# Supplementary material
Source: PubMed Central journal article supplement (PMC6697091)
Supplement: NIHMS1044961-supplement-SI.pdf [file NIHMS1044961-supplement-SI.pdf]

## SUPPORTING INFORMATION

### **High-Throughput Screening and Quantitative Chemical Ranking for Sodium Iodide Symporter (NIS) Inhibitors in ToxCast Phase I Chemical Library**

Jun Wang<sup>1,2</sup>, Daniel R. Hallinger<sup>2</sup>, Ashley S. Murr<sup>2</sup>, Angela R. Buckalew<sup>2</sup>, Steven O. Simmons<sup>3</sup>,  
Susan C. Laws<sup>2,\*</sup>, Tammy E. Stoker<sup>2,\*</sup>

<sup>1</sup>Oak Ridge Institute for Science and Education, US Department of Energy, Oak Ridge, TN 37831, USA;

<sup>2</sup>Endocrine Toxicology Branch, Toxicity Assessment Division, National Health and Environmental Effects Research Laboratory, Office of Research and Development, U.S. Environmental Protection Agency, Research Triangle Park, NC, 27711, USA.

<sup>3</sup>National Center for Computational Toxicology, Office of Research and Development, U.S. Environmental Protection Agency, Research Triangle Park, NC, 27711, USA

\*CORRESPONDING AUTHORS: [laws.susan@epa.gov](mailto:laws.susan@epa.gov) and [stoker.tammy@epa.gov](mailto:stoker.tammy@epa.gov)

#### **Environmental Science & Technology**

Number of Pages: 363

Number of Figures: 3

Number of Tables: 5

|                                                                                                             |                   |
|-------------------------------------------------------------------------------------------------------------|-------------------|
| Part I. Supplemental Materials and Methods                                                                  | Pages S2 - S6     |
| Part II. Supplemental Figure S1-S3, Table S1-S5                                                             | Pages S7 - S20    |
| Part III. Dose-response of all chemicals tested in multi-concentration with plots ordered by ranking scores | Pages S21 - S190  |
| Part IV. Dose-response of sodium perchlorate and DCNQ positive controls in multi-concentration screening    | Pages S191 – S299 |
| Part V. Dose-response of reanalyzed reference chemicals                                                     | Pages S300 – S304 |
| Part VI. Documented Data Analysis in R Markdown                                                             | Pages S305 – S363 |

## **Part I. Supplemental Materials and Methods**

### **Identification of Iodide Interference using Sandell-Kolthoff Reaction**

Sandell-Kolthoff (SK) reaction is a colorimetric method to quantify iodide concentration through measurement of the iodide-catalyzed conversion of  $Ce^{4+}$  (yellow) to  $Ce^{3+}$  (colorless) <sup>1, 2</sup>. SK reaction assay was used to detect the presence of iodide contamination or structural iodide in chemical samples that could possibly interfere with the RAIU assay and cause a false positive response. All 310 samples were tested by SK reaction following a previously developed protocol <sup>3</sup>. Briefly, 0.35 $\mu$ L of 100 $\mu$ M chemical samples were transferred to assay plate wells containing 69.7 $\mu$ L uptake buffer. Then standards (NaI, 100, 200, 300, 400, 500 nM) were added to specified duplicate wells at 70 $\mu$ L each. To initiate the reaction, 70 $\mu$ L of 24mM sodium arsenite solution and 70 $\mu$ L of 9.9mM ammonium cerium sulfate solution was added to all wells. The reaction was incubated for 20 minutes at room temperature and subsequently measured for absorbance at 420nm on a SpectraMax Plus Microplate Reader (Molecular Devices, Sunnyvale, CA). Raw  $A_{420}$  readings were log<sub>10</sub>-transformed and NaI standards readings were fitted with linear regression to interpolate iodide concentration for each chemical. All testing was performed in triplicates.

Only two chemicals (iodosulfuron-methyl-sodium and 3-iodo-2-propynyl-N-butylcarbamate) produced positive SK reactions, suggesting that overall iodide contamination was not introducing false positive results in the RAIU assay. Iodosulfuron-methyl-sodium had <20% RAIU inhibition in the single-concentration screening and therefore was not tested in the multi-concentration assay. 3-iodo-2-propynyl-N-butylcarbamate produced  $A_{420}$  readings beyond the upper range of the standard curve (> 35pmol/well). However, since 3-iodo-2-propynyl-N-butylcarbamate structurally contains iodide, it is unclear whether the strong S-K reaction was triggered by the chemical itself

or the iodide contamination in the sample. This uncertainty about iodide contamination confounds any interpretation of 3-iodo-2-propynyl-N-butylcarbamate results as an efficacious NIS inhibitor in the RAIU assay.

### **Dose-response curve fitting and plotting**

Dose-response curves were fitted using the Hill model provided in U.S. EPA's ToxCast Pipeline (tcpl v1.2.2) R package.<sup>4</sup> The Hill model contains three parameters with bottom asymptote constrained to 0 and is given by the formula:

$$f(x, (tp, ga, gw)) = \frac{tp}{1+10^{(ga-x)gw}} \quad (1)$$

Where  $x$  is the log concentration,  $tp$  is the top asymptote for the given chemical,  $ga$  is the  $AC_{50}$  (the log concentration where the modeled activity equals 50% of the top asymptote), and  $gw$  is the Hill coefficient. The Hill model provided in the tcpl R package constrains the three parameters as following:

- (1)  $0 \leq tp \leq 1.2$  times the maximum response value
- (2)  $(\text{minimum log concentration minus } 2) \leq ga \leq (\text{maximum log concentration plus } 0.5)$
- (3)  $0.3 \leq gw \leq 8$

Prior to curve fitting, the modeling function in the tcpl R package first checked for significant response by comparing the median of normalized chemical responses at each concentration to the 3bMAD value of each assay. The 3bMAD of the multi-concentration RAIU and cell viability assay (23.8% and 17.7% respectively) were calculated separately for each assay using the normalized response values collected from the two lowest concentrations of all test chemical samples. Curve fitting was only performed when a significant response was present.

Prior to curve fitting, the normalized multi-concentration response data were also inverted by subtracting normalized value from 100. This was done because the modeling function in the `tcpl` R package requires multi-concentration assay data to be conformed in the positive direction, whereas the RAIU and cell viability assay results were in the negative direction (inhibition from maximal response). Predicted response values ( $\hat{y}$ ) were calculated using the fitted Hill model parameters for each chemical. To visualize assay data and fitted dose-response curve together in the original negative direction,  $\hat{y}$  values were subtracted from 100 and used to plot the dose-response curve. The normalized RAIU and cell viability responses, along with their fitted dose-response curve were plotted together in one graph for each chemical using the R package `ggplot2` v2.2.<sup>5</sup>

## **Abbreviations**

U.S.EPA (United States Environmental Protection Agency), AOP (adverse outcome pathway), EDSP (Endocrine Disruptor Screening Program), ToxCast (Toxicity Forecaster), HTS (high-throughput screening), NIS (sodium iodide symporter), T<sub>3</sub> (triiodothyronine), T<sub>4</sub> (thyroxine), TH (thyroid hormone), RAIU (radioactive iodide uptake), RLU (relative light unit), SD (standard deviation), CV (coefficient of variation), 3bMAD (three times the baseline median absolute deviation), DMSO (dimethylsulfoxide), 2,4-D (2,4-dichlorophenoxyacetic acid), DCNQ (2,3-dichloro-1,4-naphthoquinone), HEK (human embryonic kidney), DMEM (Dulbecco's Modified Eagle Medium), CPM (counts per minute), TAA (toxicity-adjusted area), PFOS (perfluorooctanesulfonic acid), PFOA (perfluorooctanoic acid), BDE-47 (2,2',4,4'-Tetrabromodiphenyl ether)

## References

1. Waltz, F.; Pillette, L.; Ambroise, Y., A nonradioactive iodide uptake assay for sodium iodide symporter function. *Analytical biochemistry* **2010**, *396*, (1), 91-95.
2. Sandell, E. B.; Kolthoff, I. M., Chronometric catalytic method for the determination of micro quantities of iodine. *J. Am. Chem. Soc.* **1934**, *56*, (6), 1426-1426.
3. Hallinger, D. R.; Murr, A. S.; Buckalew, A. R.; Simmons, S. O.; Stoker, T. E.; Laws, S. C., Development of a screening approach to detect thyroid disrupting chemicals that inhibit the human sodium iodide symporter (NIS). *Toxicol. In Vitro* **2017**, *40*, 66-78.
4. Filer, D. L.; Kothiya, P.; Setzer, R. W.; Judson, R. S.; Martin, M. T., tcpl: the ToxCast pipeline for high-throughput screening data. *Bioinformatics* **2017**, *33*, (4), 618-620.
5. Wickham, H., *ggplot2: elegant graphics for data analysis*. Springer: 2016.

## Part II. Supplemental Figures and Tables

| Single Concentration Screen: 96-well Plate Format |             |             |                |               |              |              |             |              |               |                |             |             |
|---------------------------------------------------|-------------|-------------|----------------|---------------|--------------|--------------|-------------|--------------|---------------|----------------|-------------|-------------|
|                                                   | 1           | 2           | 3              | 4             | 5            | 6            | 7           | 8            | 9             | 10             | 11          | 12          |
| A                                                 | Sample 1    | 100uM NaNO3 | 100uM NaClO4   | 100uM NaClO4  | 100uM NaClO4 | 100uM NaClO4 | 1uM NaClO4  | 0.1uM NaClO4 | 0.01uM NaClO4 | 0.001uM NaClO4 | 100uM 2,4-D | 100uM NaSCN |
| B                                                 | Sample 2    | Sample 3    | Sample 4       | Sample 5      | Sample 6     | 0.5% DMSO    | Sample 7    | Sample 8     | Sample 9      | Sample 10      | Sample 11   | 0.5% DMSO   |
| C                                                 | Sample 12   | Sample 13   | Sample 14      | Sample 15     | Sample 16    | 0.5% DMSO    | Sample 17   | Sample 18    | Sample 19     | Sample 20      | Sample 21   | 0.5% DMSO   |
| D                                                 | Sample 22   | Sample 23   | Sample 24      | Sample 25     | Sample 26    | 0.5% DMSO    | Sample 27   | Sample 28    | Sample 29     | Sample 30      | Sample 31   | 0.5% DMSO   |
| E                                                 | Sample 32   | Sample 33   | Sample 34      | Sample 35     | Sample 36    | 0.5% DMSO    | Sample 37   | Sample 38    | Sample 39     | Sample 40      | Sample 41   | 0.5% DMSO   |
| F                                                 | Sample 42   | Sample 43   | Sample 44      | Sample 45     | Sample 46    | 0.5% DMSO    | Sample 47   | Sample 48    | Sample 49     | Sample 50      | Sample 51   | 0.5% DMSO   |
| G                                                 | Sample 52   | Sample 53   | Sample 54      | Sample 55     | Sample 56    | 0.5% DMSO    | Sample 57   | Sample 58    | Sample 59     | Sample 60      | Sample 61   | 0.5% DMSO   |
| H                                                 | 100uM NaSCN | 100uM 2,4-D | 0.001uM NaClO4 | 0.01uM NaClO4 | 0.1uM NaClO4 | 1uM NaClO4   | 10uM NaClO4 | 100uM NaClO4 | 100uM NaClO4  | 100uM NaClO4   | 100uM NaNO3 | Sample 62   |

  

| Concentration Resposne: 96-well Plate Format |              |             |                |               |              |             |             |              |               |                |              |             |
|----------------------------------------------|--------------|-------------|----------------|---------------|--------------|-------------|-------------|--------------|---------------|----------------|--------------|-------------|
|                                              | 1            | 2           | 3              | 4             | 5            | 6           | 7           | 8            | 9             | 10             | 11           | 12          |
| A                                            | 0.5% DMSO    | 100uM NaNO3 | 100uM NaClO4   | 100uM NaClO4  | 100uM NaClO4 | 10uM NaClO4 | 1uM NaClO4  | 0.1uM NaClO4 | 0.01uM NaClO4 | 0.001uM NaClO4 | 100uM 2,4-D  | 100uM NaSCN |
| B                                            | 0.001uM DCNQ | 0.001uM TC1 | 0.001uM TC2    | 0.001uM TC3   | 0.001uM TC4  | 0.001uM TC5 | 0.001uM TC6 | 0.001uM TC7  | 0.001uM TC8   | 0.001uM TC9    | 0.001uM TC10 | 0.5% DMSO   |
| C                                            | 0.01uM DCNQ  | 0.01uM TC1  | 0.01uM TC2     | 0.01uM TC3    | 0.01uM TC4   | 0.01uM TC5  | 0.01uM TC6  | 0.01uM TC7   | 0.01uM TC8    | 0.01uM TC9     | 0.01uM TC10  | 0.5% DMSO   |
| D                                            | 0.1uM DCNQ   | 0.1uM TC1   | 0.1uM TC2      | 0.1uM TC3     | 0.1uM TC4    | 0.1uM TC5   | 0.1uM TC6   | 0.1uM TC7    | 0.1uM TC8     | 0.1uM TC9      | 0.1uM TC10   | 0.5% DMSO   |
| E                                            | 1uM DCNQ     | 1uM TC1     | 1uM TC2        | 1uM TC3       | 1uM TC4      | 1uM TC5     | 1uM TC6     | 1uM TC7      | 1uM TC8       | 1uM TC9        | 1uM TC10     | 0.5% DMSO   |
| F                                            | 10uM DCNQ    | 10uM TC1    | 10uM TC2       | 10uM TC3      | 10uM TC4     | 10uM TC5    | 10uM TC6    | 10uM TC7     | 10uM TC8      | 10uM TC9       | 10uM TC10    | 0.5% DMSO   |
| G                                            | 100uM DCNQ   | 100uM TC1   | 100uM TC2      | 100uM TC3     | 100uM TC4    | 100uM TC5   | 100uM TC6   | 100uM TC7    | 100uM TC8     | 100uM TC9      | 100uM TC10   | 0.5% DMSO   |
| H                                            | 100uM NaSCN  | 100uM 2,4-D | 0.001uM NaClO4 | 0.01uM NaClO4 | 0.1uM NaClO4 | 1uM NaClO4  | 10uM NaClO4 | 100uM NaClO4 | 100uM NaClO4  | 100uM NaClO4   | 100uM NaNO3  | 0.5% DMSO   |

**Figure S1. Chemical assay plate map for single-concentration and multi-concentration screening.** For single-concentration screening, each plate can test 62 samples. For multiple-concentration screening, ten test chemicals (TC), each in six dilutions, can be tested on each assay plate.

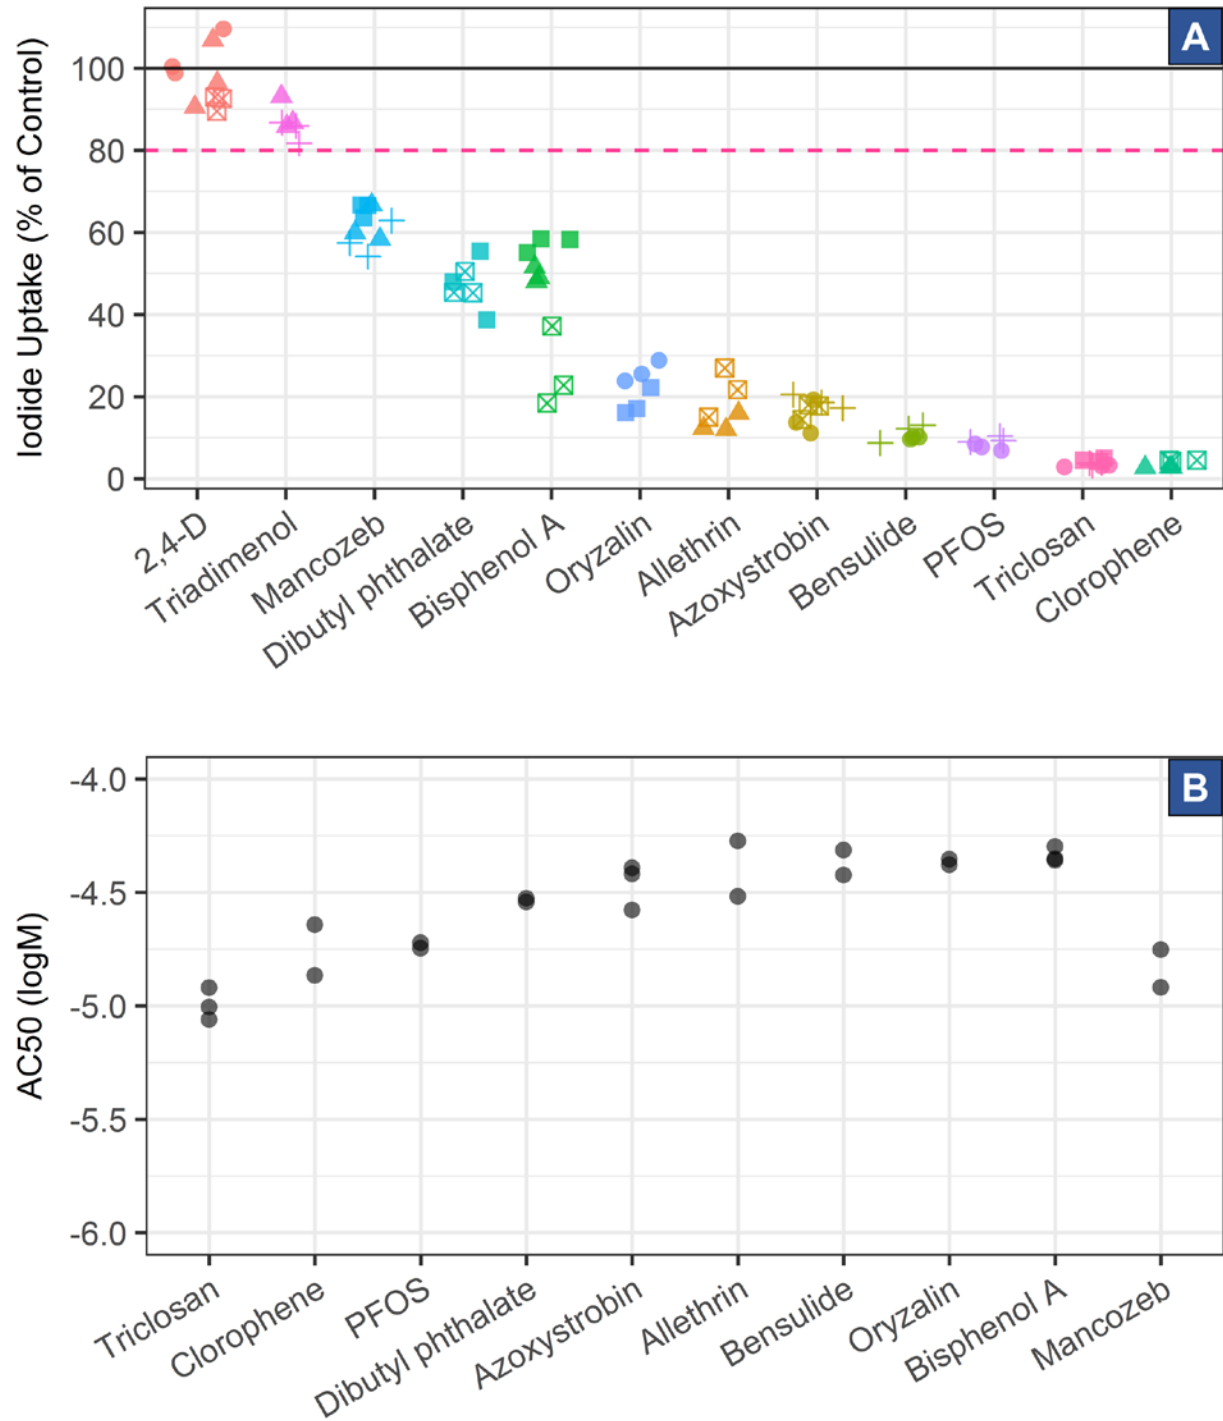

**Figure S2. (A) Responses of internal replicates in single-concentration screening.** 12 chemicals in the ToxCast phase1\_v2 library were replicated 2 or 3 times (supplied in 2 or 3 blinded



chemical samples). Colors represent different chemicals, while shapes indicate different internally replicated samples for a given chemical. Since each sample was tested in three bioreplicates, each shape for a given chemical has three data points. Ten of the 12 replicated chemicals that gave >20% inhibition (pink horizontal line) in this single-concentration test were subsequently tested in multi-concentration format (Fig. S3B). **(B) AC<sub>50</sub> of internal replicates in multi-concentration screening.** Each symbol represents one AC<sub>50</sub> value obtained from one sample of the chemical tested in three bioreplicates in multi-concentration.

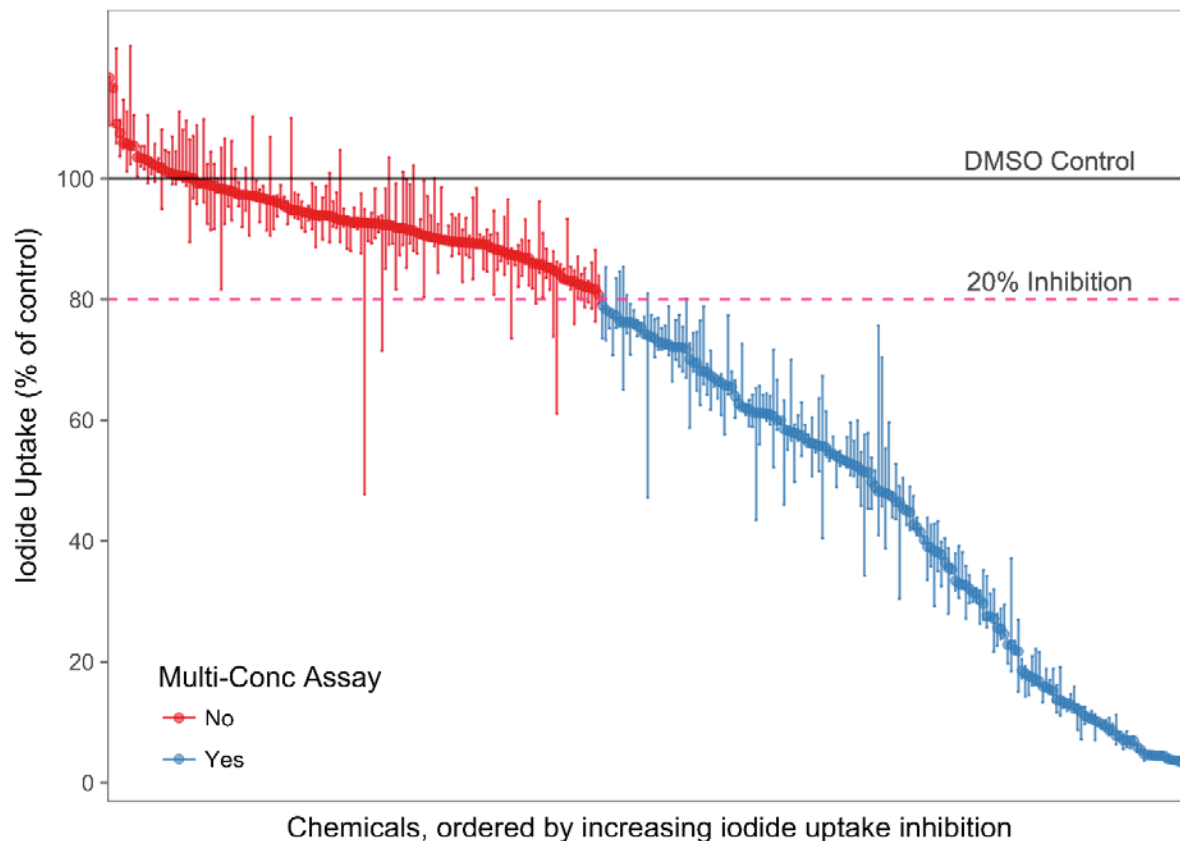

**Figure S3. Median and range of test chemical responses in single-concentration RAIU screening.** Median response of each chemical is represented by the dot and vertical bar shows the maximal iodide uptake (top of the bar) and the minimum iodide uptake (bottom of the bar). The pink horizontal line represents the 20% inhibition threshold. 310 blinded samples were tested at maximum permissible concentrations (typically 100  $\mu$ M). 169 chemicals (54.5%) were selected for further testing in multi-concentration format based on a 20% inhibition activity threshold.

**Table S1. List of test chemicals and screening results**

Max Conc: the maximum permissible concentration tested in single-concentration screening. The Max Conc was obtained by 200X dilution of the supplied stock chemicals (concentrations  $\leq$  20mM). Serial dilution of samples for multi-concentration assay started with the Max Conc. \*: precipitate visually observed in the well of stock chemical plate.

Multi-Conc Test: indicates whether a chemical was further tested in multi-concentration format. +: yes, -: no.

AC50: the AC50 value derived from multi-concentration dose-response curve.

absEC50: the absEC50 value derived from multi-concentration dose-response curve if the maximum inhibition achieved by the chemical was over 50%.

Cytotox-point: the log concentration where the chemical started to show significant toxicity (absEC82.3). NA: indicates no significant cytotoxicity.

Non-cytotoxic RAIU inhibition at 1 or 2 concentrations: show chemicals that have significant RAIU inhibition without significant cytotoxicity at one or two concentrations tested in multi-concentration screening. +: yes, -: no.

| Sample ID | Chemical     | CAS NO.                              | Max Conc (M) | Multi-Conc Test | TAA | Median Difference | AC50 Cytotox | AC50 RAIU | absEC50 Cytotox | absEC50 RAIU | Cytotox-point | Non-cytotoxic RAIU inhibition at 1 or 2 concentrations | Ranking Score |        |
|-----------|--------------|--------------------------------------|--------------|-----------------|-----|-------------------|--------------|-----------|-----------------|--------------|---------------|--------------------------------------------------------|---------------|--------|
| 1         | TP0001500G04 | Etoxazole                            | 153233-91-1  | 1.00E-04        | +   | 117.08            | 69.73        | -4.39     | -5.92           | NA           | -5.88         | -4.32                                                  | +             | 150.41 |
| 2         | TP0001502E10 | Triphenyltin hydroxide               | 76-87-9      | 1.00E-04        | +   | 78.91             | 59.75        | -4.83     | -5.39           | NA           | -5.39         | -5.17                                                  | -             | 114.70 |
| 3         | TP0001501D03 | Niclosamide                          | 50-65-7      | 5.00E-05        | +   | 111.12            | 34.25        | -6.03     | -6.95           | NA           | -6.79         | -6.91                                                  | -             | 109.38 |
| 4         | TP0001502G01 | 3-Iodo-2-propynyl-N-butylcarbamate   | 55406-53-6   | 1.00E-04        | +   | 70.75             | 58.13        | -4.43     | -5.09           | NA           | -5.30         | -4.80                                                  | +             | 107.61 |
| 5         | TP0001501E07 | PFOS                                 | 1763-23-1    | 8.00E-05        | +   | 36.81             | 67.33        | -4.44     | -4.75           | NA           | -4.78         | -4.09                                                  | +             | 94.75  |
| 6         | TP0001498G01 | PFOS                                 | 1763-23-1    | 8.00E-05        | +   | 34.34             | 67.82        | NA        | -4.72           | NA           | -4.74         | NA                                                     | +             | 93.63  |
| 7         | TP0001498B02 | Cyprodinil                           | 121552-61-2  | 1.00E-04        | +   | 22.88             | 70.76        | NA        | -4.43           | NA           | -4.43         | NA                                                     | +             | 89.12  |
| 8         | TP0001501G03 | Rotenone                             | 83-79-4      | 1.00E-04        | +   | 81.11             | 31.04        | -6.66     | -7.15           | NA           | -6.22         | -7.30                                                  | +             | 86.15  |
| 9         | TP0001501C09 | Pyridaben                            | 96489-71-3   | 1.00E-04        | +   | 97.26             | 13.18        | -6.85     | -8.64           | NA           | -7.49         | -7.60                                                  | -             | 78.17  |
| 10        | TP0001500E11 | Methoxyfenozide                      | 161050-58-4  | 1.00E-04        | +   | 37.63             | 49.80        | -4.78     | -4.78           | NA           | -4.72         | -4.68                                                  | +             | 76.97  |
| 11        | TP0001500E05 | 2-(Thiocyanomethylthio)benzothiazole | 21564-17-0   | 1.00E-04        | +   | 18.69             | 56.54        | -4.50     | -4.33           | NA           | -4.37         | -4.91                                                  | -             | 71.48  |
| 12        | TP0001500D09 | Oxyfluorfen                          | 42874-03-3   | 1.00E-04        | +   | 21.34             | 51.79        | NA        | -4.55           | NA           | -4.39         | NA                                                     | +             | 68.27  |
| 13        | TP0001499D08 | Captan                               | 133-06-2     | 9.50E-05        | +   | 22.48             | 48.69        | -4.39     | -4.49           | NA           | -4.50         | -4.81                                                  | -             | 65.79  |
| 14        | TP0001502F03 | Fipronil                             | 120068-37-3  | 1.00E-04        | +   | 26.79             | 44.56        | -4.52     | -4.57           | NA           | -4.63         | -4.92                                                  | +             | 64.32  |
| 15        | TP0001502E07 | Fluroxypyr-meptyl                    | 81406-37-3   | 1.00E-04        | +   | 34.57             | 39.42        | -4.24     | -4.77           | NA           | -4.74         | -4.74                                                  | +             | 64.10  |
| 16        | TP0001500D03 | Cyhalofop-butyl                      | 122008-85-9  | 9.50E-05        | +   | 37.45             | 32.21        | -5.13     | -5.47           | NA           | -4.75         | -5.07                                                  | -             | 58.47  |
| 17        | TP0001499A01 | Fenpyroximate (Z,E)                  | 111812-58-9  | 1.00E-04        | +   | 72.42             | 8.99         | -5.76     | -6.79           | NA           | -6.07         | -7.09                                                  | -             | 57.34  |
| 18        | TP0001498C01 | Thiobencarb                          | 28249-77-6   | 1.00E-04        | +   | 17.29             | 41.85        | -4.17     | -4.38           | NA           | -4.34         | -4.70                                                  | -             | 55.20  |
| 19        | TP0001500E07 | Emamectin benzoate                   | 155569-91-8  | 1.00E-04        | +   | 36.73             | 29.18        | -4.56     | -4.88           | -4.40        | -4.99         | -5.18                                                  | -             | 54.82  |
| 20        | TP0001499C08 | Diphenylamine                        | 122-39-4     | 1.00E-04        | +   | 20.68             | 38.57        | -6.53     | -4.74           | NA           | -4.28         | -5.59                                                  | -             | 54.01  |
| 21        | TP0001499G03 | Folpet                               | 133-07-3     | 1.00E-04        | +   | 28.94             | 29.96        | -4.76     | -4.93           | -4.17        | -4.92         | -5.65                                                  | -             | 50.48  |
| 22        | TP0001499B03 | Endosulfan                           | 115-29-7     | 1.00E-04        | +   | 6.95              | 43.17        | -4.90     | -4.35           | NA           | -4.39         | -4.92                                                  | -             | 49.72  |
| 23        | TP0001498C04 | Prometryn                            | 7287-19-6    | 1.00E-04        | +   | 8.56              | 41.19        | NA        | -4.44           | NA           | NA            | NA                                                     | +             | 48.73  |
| 24        | TP0001502F02 | Zoxamide                             | 156052-68-5  | 1.00E-04        | +   | 17.68             | 35.40        | -4.51     | -4.48           | NA           | -4.37         | -4.66                                                  | -             | 48.72  |
| 25        | TP0001499E01 | Cyazofamid                           | 120116-88-3  | 1.00E-04        | +   | 23.13             | 31.74        | -6.50     | -5.59           | NA           | NA            | NA                                                     | +             | 48.49  |
| 26        | TP0001501E01 | Parathion                            | 56-38-2      | 1.00E-04        | +   | 18.21             | 32.70        | -4.74     | -4.72           | NA           | -4.49         | -4.01                                                  | -             | 46.24  |
| 27        | TP0001498F01 | Fenthion                             | 55-38-9      | 1.00E-04        | +   | 10.98             | 36.93        | -4.29     | -4.40           | NA           | -4.18         | -3.72                                                  | -             | 45.87  |
| 28        | TP0001499G11 | Mancozeb                             | 2234562      | 5.00E-05        | +   | 11.69             | 33.73        | -8.21     | -4.92           | NA           | NA            | -4.80                                                  | -             | 43.00  |
| 29        | TP0001502F04 | Bifenazate                           | 149877-41-8  | 1.00E-04        | +   | 12.05             | 32.60        | -4.29     | -4.42           | NA           | -4.39         | -4.87                                                  | -             | 42.05  |
| 30        | TP0001502F09 | Chlorophene                          | 120-32-1     | 1.00E-04        | +   | 41.67             | 13.77        | -4.34     | -4.87           | -4.34        | -5.07         | -4.68                                                  | +             | 41.98  |
| 31        | TP0001499F10 | Trifloxystrobin                      | 141517-21-7  | 1.00E-04        | +   | 32.63             | 18.86        | -5.14     | -5.67           | NA           | -5.05         | -5.99                                                  | -             | 41.32  |
| 32        | TP0001500D07 | Triclosan                            | 3380-34-5    | 1.00E-04        | +   | 42.32             | 12.63        | -4.47     | -5.01           | -4.48        | -5.00         | -4.98                                                  | +             | 41.22  |
| 33        | TP0001502B03 | Methoxychlor                         | 72-43-5      | 9.50E-05        | +   | 8.19              | 33.80        | NA        | -4.58           | NA           | NA            | NA                                                     | +             | 40.75  |
| 34        | TP0001499F01 | Quinoxifen                           | 124495-18-7  | 1.00E-04        | +   | 15.11             | 29.11        | -4.52     | -4.47           | NA           | -4.44         | -4.85                                                  | -             | 40.43  |
| 35        | TP0001499G01 | Triflumizole                         | 68694-11-1   | 1.00E-04        | +   | 20.48             | 25.56        | -4.41     | -4.53           | -4.26        | -4.61         | -4.82                                                  | -             | 40.28  |
| 36        | TP0001501E11 | Prallethrin                          | 23031-36-9   | 9.50E-05        | +   | 10.01             | 29.52        | -4.40     | -4.38           | NA           | -4.33         | -4.66                                                  | -             | 37.48  |
| 37        | TP0001499C01 | S-Bioallethrin                       | 28434-00-6   | 1.00E-04        | +   | 12.54             | 27.83        | -4.37     | -4.42           | NA           | -4.37         | -4.62                                                  | -             | 37.39  |
| 38        | TP0001502B10 | Coumaphos                            | 56-72-4      | 1.00E-04        | +   | 29.15             | 17.16        | -4.52     | -5.00           | -4.20        | -4.79         | -4.95                                                  | -             | 37.24  |
| 39        | TP0001502F07 | Chlorpyrifos-methyl                  | 5598-13-0    | 1.00E-04        | +   | 22.77             | 20.26        | -4.58     | -5.01           | NA           | NA            | -5.16                                                  | +             | 36.26  |
| 40        | TP0001498D10 | Fluoxastrobin                        | 361377-29-9  | 1.00E-04        | +   | 24.45             | 18.81        | -4.86     | -4.95           | -4.16        | -4.84         | -5.63                                                  | -             | 35.85  |
| 41        | TP0001501C11 | Triclosan                            | 3380-34-5    | 1.00E-04        | +   | 34.50             | 12.45        | -4.58     | -5.06           | -4.57        | -5.11         | -5.13                                                  | -             | 35.85  |

|     |              |                            |             |           |   |       |       |       |       |       |       |       |   |       |
|-----|--------------|----------------------------|-------------|-----------|---|-------|-------|-------|-------|-------|-------|-------|---|-------|
| 42  | TP0001498H12 | Pyraclostrobin             | 175013-18-0 | 1.00E-04  | + | 40.06 | 8.29  | -4.93 | -6.02 | -4.05 | -5.91 | -6.27 | - | 35.19 |
| 43  | TP0001502G11 | Fenoxaprop-ethyl           | 66441-23-4  | 1.00E-04  | + | 12.00 | 25.91 | -5.04 | -4.53 | NA    | -4.09 | -5.05 | - | 35.03 |
| 44  | TP0001501D10 | Fenoxycarb                 | 72490-01-8  | 1.00E-04  | + | 12.39 | 25.23 | -4.51 | -4.47 | -4.30 | -4.51 | -4.91 | - | 34.58 |
| 45  | TP0001500G01 | Hexaconazole               | 79983-71-4  | 1.00E-04  | + | 10.02 | 26.66 | -4.39 | -4.45 | NA    | -4.13 | -4.55 | - | 34.50 |
| 46  | TP0001499E10 | Diclosulam                 | 145701-21-9 | 1.00E-04  | + | 11.50 | 25.61 | -6.14 | -4.82 | NA    | NA    | -4.92 | - | 34.38 |
| 47  | TP0001499D01 | Clorophene                 | 120-32-1    | 1.00E-04  | + | 26.21 | 16.05 | -4.34 | -4.64 | -4.32 | -4.75 | -4.69 | + | 34.14 |
| 48  | TP0001498D08 | Tebupirimfos               | 96182-53-5  | 1.00E-04  | + | 15.29 | 22.18 | -4.42 | -4.61 | NA    | -4.42 | -4.54 | - | 33.31 |
| 49  | TP0001501C02 | Abamectin                  | 71751-41-2  | 1.00E-04* | + | 5.35  | 27.70 | NA    | -4.33 | NA    | NA    | NA    | + | 32.50 |
| 50  | TP0001500E08 | Pyriproxyfen               | 95737-68-1  | 1.00E-04  | + | 17.91 | 19.65 | -4.67 | -4.70 | NA    | -4.11 | -4.90 | - | 32.40 |
| 51  | TP0001498B11 | Triclosan                  | 3380-34-5   | 1.00E-04  | + | 27.09 | 13.76 | -4.48 | -4.92 | -4.46 | -4.90 | -5.01 | + | 32.32 |
| 52  | TP0001502C11 | Carfentrazone-ethyl        | 128639-02-1 | 1.00E-04  | + | 7.37  | 25.91 | -4.36 | -4.35 | NA    | -4.03 | -4.40 | - | 31.97 |
| 53  | TP0001498A01 | Pirimiphos-methyl          | 29232-93-7  | 1.00E-04  | + | 6.69  | 26.10 | -4.80 | -4.43 | NA    | NA    | -4.18 | - | 31.71 |
| 54  | TP0001502G02 | Dibutyl phthalate          | 84-74-2     | 1.00E-04  | + | 6.83  | 25.96 | -5.04 | -4.54 | NA    | NA    | -3.98 | - | 31.65 |
| 55  | TP0001498C09 | Methylene bis(thiocyanate) | 6317-18-6   | 1.00E-04  | + | 23.33 | 14.57 | -4.41 | -4.66 | -4.40 | -4.79 | -4.86 | + | 30.68 |
| 56  | TP0001502D03 | Bisphenol A                | 80-05-7     | 1.00E-04  | + | 3.01  | 26.66 | NA    | -4.36 | NA    | NA    | NA    | + | 29.86 |
| 57  | TP0001498B08 | Dithiopyr                  | 97886-45-8  | 9.50E-05  | + | 4.55  | 24.62 | NA    | -4.65 | NA    | NA    | NA    | + | 28.75 |
| 58  | TP0001500D05 | Tebufenpyrad               | 119168-77-3 | 1.00E-04  | + | 44.54 | -0.88 | -4.94 | -5.60 | -5.01 | -5.82 | -6.21 | + | 28.57 |
| 59  | TP0001502D04 | Diclofop-methyl            | 51338-27-3  | 1.00E-04  | + | 9.36  | 21.20 | -4.33 | -4.49 | NA    | -4.12 | -4.51 | - | 28.35 |
| 60  | TP0001500G11 | Dibutyl phthalate          | 84-74-2     | 1.00E-04  | + | 8.88  | 21.21 | -5.81 | -4.53 | NA    | NA    | -4.29 | - | 28.05 |
| 61  | TP0001498G03 | Lactofen                   | 77501-63-4  | 1.00E-04  | + | 3.22  | 24.45 | NA    | -4.79 | NA    | NA    | NA    | + | 27.70 |
| 62  | TP0001500C09 | Piperonyl butoxide         | 51-03-6     | 1.00E-04  | + | 6.04  | 21.84 | -6.26 | -4.22 | NA    | NA    | -4.87 | - | 26.83 |
| 63  | TP0001500B08 | Buprofezin                 | 69327-76-0  | 1.00E-04  | + | 1.80  | 24.15 | -4.89 | -4.55 | -4.80 | -4.61 | -4.95 | + | 26.43 |
| 64  | TP0001502G03 | Cloprop                    | 101-10-0    | 1.00E-04  | + | 5.86  | 21.41 | -5.57 | -4.49 | NA    | NA    | -3.45 | - | 26.25 |
| 65  | TP0001498C10 | Flutolanil                 | 66332-96-5  | 1.00E-04  | + | 3.56  | 22.53 | NA    | -4.50 | NA    | NA    | NA    | + | 25.91 |
| 66  | TP0001500G03 | Cinmethylin                | 87818-31-3  | 1.00E-04  | + | 6.94  | 18.92 | -4.52 | -4.23 | NA    | NA    | -4.43 | - | 24.38 |
| 67  | TP0001502D09 | Chlorpropham               | 101-21-3    | 1.00E-04  | + | 2.02  | 21.99 | NA    | -4.42 | NA    | NA    | NA    | + | 24.33 |
| 68  | TP0001499C09 | Clodinafop-propargyl       | 105512-06-9 | 1.00E-04  | + | 4.96  | 20.06 | NA    | -5.70 | NA    | NA    | NA    | + | 24.25 |
| 69  | TP0001501G11 | Phosalone                  | 2310-17-0   | 1.00E-04  | + | 11.28 | 15.74 | -4.35 | -4.46 | -4.04 | -4.35 | -4.59 | - | 23.91 |
| 70  | TP0001502F05 | Allethrin                  | 584-79-2    | 1.00E-04  | + | 11.84 | 14.16 | -4.40 | -4.52 | -4.25 | -4.49 | -4.82 | - | 22.64 |
| 71  | TP0001501G10 | Disulfoton                 | 298-04-4    | 1.00E-04  | + | 7.02  | 16.53 | -4.41 | -4.27 | NA    | NA    | -4.44 | - | 21.93 |
| 72  | TP0001502B05 | Flumiclorac-pentyl         | 87546-18-7  | 1.00E-04  | + | 7.21  | 16.35 | -4.79 | -4.50 | NA    | -4.16 | -5.26 | - | 21.87 |
| 73  | TP0001502D11 | Forchlorfenuron            | 68157-60-8  | 1.00E-04  | + | 7.16  | 16.17 | -4.46 | -4.44 | -4.40 | -4.50 | -4.94 | - | 21.64 |
| 74  | TP0001500F07 | Flumetralin                | 62924-70-3  | 1.00E-04  | + | 3.23  | 18.36 | NA    | -4.33 | NA    | NA    | NA    | + | 21.33 |
| 75  | TP0001501E03 | Ethalfuralin               | 55283-68-6  | 1.00E-04  | + | 20.37 | 6.86  | -4.93 | -5.16 | -4.44 | -4.93 | -5.93 | - | 20.66 |
| 76  | TP0001500B09 | Lindane                    | 58-89-9     | 1.00E-04  | + | 0.09  | 19.55 | NA    | -4.32 | NA    | NA    | NA    | + | 20.50 |
| 77  | TP0001500G08 | Fluazinam                  | 79622-59-6  | 9.00E-05  | + | 23.08 | 4.58  | -4.72 | -5.16 | -4.75 | -5.13 | -5.40 | - | 20.06 |
| 78  | TP0001501D02 | Cyfluthrin                 | 68359-37-5  | 1.00E-04  | + | 1.04  | 18.35 | NA    | -4.57 | NA    | NA    | NA    | + | 19.87 |
| 79  | TP0001499D02 | Tri-allate                 | 2303-17-5   | 1.00E-04  | + | 12.78 | 10.27 | -4.42 | -4.61 | -4.32 | -4.57 | -4.84 | + | 19.20 |
| 80  | TP0001502G07 | Imazalil                   | 35554-44-0  | 1.00E-04  | + | 6.53  | 14.20 | -4.56 | -4.50 | NA    | NA    | -4.94 | - | 19.16 |
| 81  | TP0001502E08 | Cypermethrin               | 52315-07-8  | 1.00E-04  | + | 0.76  | 17.20 | NA    | -4.96 | NA    | NA    | NA    | + | 18.48 |
| 82  | TP0001500F09 | Amitraz                    | 33089-61-1  | 1.00E-04  | + | 6.97  | 12.95 | -4.18 | -4.22 | NA    | NA    | -4.94 | - | 18.15 |
| 83  | TP0001499E11 | Tetraconazole              | 112281-77-3 | 9.50E-05  | + | 13.62 | 8.60  | -4.41 | -4.65 | -4.17 | -4.33 | -4.86 | - | 18.01 |
| 84  | TP0001502C07 | Thiazopyr                  | 117718-60-2 | 1.00E-04  | + | 0.05  | 17.07 | NA    | -4.62 | NA    | NA    | NA    | + | 17.88 |
| 85  | TP0001502E02 | Trifluralin                | 1582-09-8   | 1.00E-04  | + | 16.64 | 6.45  | -4.26 | -4.95 | NA    | NA    | -5.61 | + | 17.76 |
| 86  | TP0001500F11 | Tebufenozide               | 112410-23-8 | 1.00E-04  | + | 4.74  | 13.98 | NA    | -4.68 | NA    | NA    | NA    | + | 17.75 |
| 87  | TP0001502B07 | Azoxystrobin               | 131860-33-8 | 1.00E-04  | + | 9.69  | 10.74 | -4.52 | -4.58 | -4.42 | -4.59 | -5.04 | + | 17.64 |
| 88  | TP0001501B01 | Mancozeb                   | 2234562     | 5.00E-05  | + | 0.01  | 16.75 | NA    | -4.75 | NA    | NA    | NA    | + | 17.52 |
| 89  | TP0001500F01 | Fluazifop-butyl            | 69806-50-4  | 1.00E-04  | + | 3.60  | 14.37 | -4.45 | -4.36 | NA    | NA    | -4.26 | - | 17.41 |
| 90  | TP0001502F10 | Fenarimol                  | 60168-88-9  | 1.00E-04  | + | 2.31  | 14.65 | -6.18 | -5.11 | NA    | NA    | -1.70 | - | 16.84 |
| 91  | TP0001499B11 | Allethrin                  | 584-79-2    | 1.00E-04  | + | 1.36  | 14.88 | -4.37 | -4.27 | -4.18 | -4.24 | -4.69 | - | 16.46 |
| 92  | TP0001498E08 | Maneb                      | 12427-38-2  | 1.00E-04  | + | 1.46  | 14.75 | NA    | -4.37 | NA    | NA    | NA    | + | 16.39 |
| 93  | TP0001498D07 | Flusilazole                | 85509-19-9  | 1.00E-04  | + | 1.30  | 14.68 | -4.33 | -4.25 | -4.04 | -4.16 | -4.66 | - | 16.20 |
| 94  | TP0001499B01 | Bisphenol A                | 80-05-7     | 1.00E-04  | + | 0.54  | 14.20 | NA    | -4.35 | NA    | NA    | NA    | + | 15.20 |
| 95  | TP0001498G05 | Ametryn                    | 834-12-8    | 1.00E-04  | + | 0.18  | 14.02 | NA    | -4.26 | NA    | NA    | NA    | + | 14.78 |
| 96  | TP0001499G10 | Fluazifop-P-butyl          | 79241-46-6  | 1.00E-04  | + | 2.17  | 12.47 | -5.72 | -4.41 | NA    | NA    | -4.84 | - | 14.47 |
| 97  | TP0001500E10 | Dimiconazole               | 83657-24-3  | 1.00E-04  | + | 10.00 | 7.26  | -4.38 | -4.50 | -4.40 | -4.56 | -4.79 | - | 14.21 |
| 98  | TP0001501G09 | Pendimethalin              | 40487-42-1  | 1.00E-04  | + | 3.21  | 11.06 | -4.46 | -4.32 | NA    | NA    | -4.36 | - | 13.68 |
| 99  | TP0001501F07 | Fenitrothion               | 122-14-5    | 1.00E-04  | + | 0.11  | 12.82 | NA    | -4.49 | NA    | NA    | NA    | + | 13.48 |
| 100 | TP0001502B04 | Isazofos                   | 42509-80-8  | 1.00E-04  | + | 0.02  | 12.85 | NA    | -4.26 | NA    | NA    | NA    | + | 13.45 |
| 101 | TP0001502B01 | Oxadiazon                  | 19666-30-9  | 1.00E-04  | + | 3.82  | 9.10  | -4.36 | -4.30 | NA    | NA    | -4.43 | - | 12.04 |
| 102 | TP0001498D11 | Hexythiazox                | 78587-05-0  | 1.00E-04  | + | 0.28  | 10.69 | NA    | -4.46 | NA    | NA    | NA    | + | 11.36 |
| 103 | TP0001500E09 | Fenamidon                  | 161326-34-7 | 1.00E-04  | + | 1.21  | 9.99  | -4.83 | -4.29 | NA    | NA    | -4.09 | - | 11.25 |
| 104 | TP0001498F05 | Difenoconazole             | 119446-68-3 | 1.00E-04  | + | 17.47 | -0.50 | -4.52 | -4.75 | -4.57 | -4.90 | -5.09 | - | 11.04 |
| 105 | TP0001502C04 | Fluthiacet-methyl          | 117337-19-6 | 1.00E-04  | + | 1.26  | 9.42  | -4.52 | -4.72 | NA    | NA    | -3.59 | - | 10.68 |
| 106 | TP0001501F01 | Azoxystrobin               | 131860-33-8 | 1.00E-04  | + | -0.60 | 10.18 | -4.54 | -4.42 | -4.51 | -4.47 | -5.06 | - | 10.24 |
| 107 | TP0001498E01 | Oryzalin                   | 19044-88-3  | 1.00E-04  | + | 3.52  | 6.81  | -4.35 | -4.38 | -4.03 | -4.17 | -4.63 | - | 9.45  |
| 108 | TP0001501E05 | Thidiazuron                | 51707-55-2  | 1.00E-04  | + | 1.43  | 8.12  | -5.12 | -4.44 | NA    | NA    | -4.23 | - | 9.43  |

Part II. Supplemental Figure S1-S3, Table S1-S5

|     |              |                                                              |             |          |   |       |        |       |       |       |       |       |   |        |
|-----|--------------|--------------------------------------------------------------|-------------|----------|---|-------|--------|-------|-------|-------|-------|-------|---|--------|
| 109 | TP0001500B05 | Famoxadone                                                   | 131807-57-3 | 1.00E-04 | + | 12.44 | 0.72   | -5.16 | -5.69 | -4.49 | -4.81 | -6.04 | - | 8.99   |
| 110 | TP0001502E04 | Dicofol                                                      | 115-32-2    | 1.00E-04 | + | 11.70 | 1.10   | -4.35 | -4.54 | -4.39 | -4.61 | -4.72 | + | 8.89   |
| 111 | TP0001500F02 | Propargite                                                   | 2312-35-8   | 1.00E-04 | + | 3.84  | 5.99   | -4.41 | -4.40 | NA    | NA    | -4.64 | - | 8.80   |
| 112 | TP0001501E02 | 2,2-Bis(4-hydroxyphenyl)-1,1,1-trichloroethane               | 2971-36-0   | 1.00E-04 | + | 2.22  | 6.91   | -4.44 | -4.39 | -4.44 | -4.46 | -4.90 | - | 8.69   |
| 113 | TP0001502G09 | Propiconazole                                                | 60207-90-1  | 1.00E-04 | + | 2.04  | 6.27   | -4.89 | -4.39 | NA    | NA    | -4.75 | - | 7.91   |
| 114 | TP0001498E11 | Chlorethoxyfos                                               | 54593-83-8  | 1.00E-04 | + | 0.06  | 7.17   | NA    | -4.41 | NA    | NA    | NA    | + | 7.53   |
| 115 | TP0001502G04 | Thiodicarb                                                   | 59669-26-0  | 1.00E-04 | + | 1.93  | 4.68   | -4.24 | -4.91 | NA    | NA    | -4.83 | - | 6.17   |
| 116 | TP0001500D04 | Ethofumesate                                                 | 26225-79-6  | 1.00E-04 | + | 2.29  | 4.30   | -4.42 | -4.52 | NA    | NA    | -4.56 | - | 6.01   |
| 117 | TP0001498F07 | Bensulide                                                    | 741-58-2    | 1.00E-04 | + | 2.19  | 3.96   | -4.41 | -4.42 | -4.40 | -4.43 | -4.83 | - | 5.59   |
| 118 | TP0001500G09 | Prodiamine                                                   | 29091-21-2  | 1.00E-04 | + | 7.18  | 0.65   | -4.38 | -4.49 | -4.39 | -4.52 | -4.80 | - | 5.44   |
| 119 | TP0001501D04 | Bensulide                                                    | 741-58-2    | 1.00E-04 | + | -0.55 | 5.55   | -4.36 | -4.31 | -4.36 | -4.34 | -4.72 | - | 5.44   |
| 120 | TP0001500C04 | Bisphenol A                                                  | 80-05-7     | 1.00E-04 | + | 0.26  | 4.15   | -4.62 | -4.30 | NA    | NA    | -3.77 | - | 4.51   |
| 121 | TP0001500G05 | Flumioxazin                                                  | 103361-09-7 | 1.00E-04 | + | 0.71  | 2.45   | -4.41 | -4.38 | -4.40 | -4.40 | -4.84 | - | 3.04   |
| 122 | TP0001502A01 | Methidathion                                                 | 950-37-8    | 1.00E-04 | + | 0.10  | 2.62   | -4.38 | -4.42 | NA    | NA    | -4.22 | - | 2.81   |
| 123 | TP0001498B05 | Azoxystrobin                                                 | 131860-33-8 | 1.00E-04 | + | -2.89 | 3.89   | -4.52 | -4.39 | -4.46 | -4.39 | -5.02 | - | 2.15   |
| 124 | TP0001498B09 | Butralin                                                     | 33629-47-9  | 1.00E-04 | + | -0.12 | 1.08   | -4.40 | -4.35 | NA    | NA    | -4.67 | - | 1.05   |
| 125 | TP0001498D01 | Dicloran                                                     | 99-30-9     | 1.00E-04 | + | -4.51 | 3.13   | -5.02 | -4.63 | NA    | NA    | -5.03 | - | 0.28   |
| 126 | TP0001500D11 | Oryzalin                                                     | 19044-88-3  | 1.00E-04 | + | 0.33  | -0.83  | -4.36 | -4.35 | NA    | NA    | -4.60 | - | -0.65  |
| 127 | TP0001501B10 | Fenbuconazole                                                | 114369-43-6 | 1.00E-04 | + | -4.70 | 1.61   | -4.36 | -4.27 | -4.39 | -4.30 | -4.72 | - | -1.43  |
| 128 | TP0001499E09 | Thiram                                                       | 137-26-8    | 1.00E-04 | + | -6.47 | 2.16   | -4.38 | -4.18 | -4.05 | -4.04 | -4.88 | - | -2.03  |
| 129 | TP0001500B02 | Tetramethrin                                                 | 7696-12-0   | 1.00E-04 | + | 0.15  | -2.88  | -4.42 | -4.41 | -4.32 | -4.32 | -4.88 | - | -2.91  |
| 130 | TP0001498D05 | Profenofos                                                   | 41198-08-7  | 5.00E-05 | + | -2.71 | -2.74  | -4.60 | -4.55 | NA    | NA    | -4.90 | - | -4.66  |
| 131 | TP0001501D01 | Quizalofop-ethyl                                             | 76578-14-8  | 8.50E-05 | + | -1.00 | -6.27  | -4.46 | -4.42 | NA    | NA    | -4.65 | - | -7.22  |
| 132 | TP0001498D03 | Prochloraz                                                   | 67747-09-5  | 1.00E-04 | + | -7.11 | -3.20  | -4.36 | -4.18 | -4.24 | -4.12 | -4.69 | - | -8.05  |
| 133 | TP0001501C04 | Milbemectin (mixture of 70% Milbemcin A4, 30% Milbemycin A3) | NOCAS_34742 | 9.50E-05 | + | 0.01  | -8.55  | -4.86 | -4.22 | NA    | NA    | -5.04 | - | -8.94  |
| 134 | TP0001498B07 | Captafol                                                     | 191906      | 1.00E-04 | + | -5.19 | -7.60  | -4.49 | -4.45 | -4.56 | -4.49 | -5.06 | - | -11.37 |
| 135 | TP0001499G02 | Tribufos                                                     | 78-48-8     | 1.00E-04 | + | -2.26 | -9.57  | -4.63 | -4.94 | NA    | NA    | -5.22 | - | -11.50 |
| 136 | TP0001499C07 | Benfluralin                                                  | 1861-40-1   | 1.00E-04 | + | -3.73 | -10.75 | -4.49 | -4.62 | NA    | NA    | -4.78 | - | -13.71 |
| 137 | TP0001500E01 | MGK-264                                                      | 113-48-4    | 1.00E-04 | + | -8.36 | -22.95 | -4.37 | -4.28 | -4.13 | NA    | -4.73 | - | -29.52 |
| 138 | TP0001498D02 | Chlorothalonil                                               | 1897-45-6   | 1.00E-04 | + | NA    | -6.23  | -4.56 | NA    | NA    | NA    | -4.03 | - | NA     |
| 139 | TP0001498G02 | Propanil                                                     | 709-98-8    | 1.00E-04 | + | NA    | -4.01  | -4.75 | NA    | NA    | NA    | -3.88 | - | NA     |
| 140 | TP0001498C03 | Bromoxynil                                                   | 1689-84-5   | 8.00E-05 | + | NA    | -14.76 | -4.62 | NA    | NA    | NA    | -5.22 | - | NA     |
| 141 | TP0001498F03 | Napropamide                                                  | 15299-99-7  | 1.00E-04 | + | NA    | 0.69   | -8.71 | NA    | NA    | NA    | NA    | - | NA     |
| 142 | TP0001498E04 | Nitrapyrin                                                   | 1929-82-4   | 1.00E-04 | + | NA    | 6.98   | NA    | NA    | NA    | NA    | NA    | - | NA     |
| 143 | TP0001498G08 | Propetamphos                                                 | 31218-83-4  | 1.00E-04 | + | NA    | 7.17   | NA    | NA    | NA    | NA    | NA    | - | NA     |
| 144 | TP0001498G09 | Myclobutanil                                                 | 88671-89-0  | 1.00E-04 | + | NA    | -1.80  | NA    | NA    | NA    | NA    | NA    | - | NA     |
| 145 | TP0001498C11 | Malathion                                                    | 121-75-5    | 1.00E-04 | + | NA    | -1.12  | -4.36 | NA    | NA    | NA    | -4.32 | - | NA     |
| 146 | TP0001499E02 | Resmethrin                                                   | 10453-86-8  | 1.00E-04 | + | NA    | -1.96  | -4.65 | NA    | NA    | NA    | -4.41 | - | NA     |
| 147 | TP0001499E03 | Fenpropathrin                                                | 39515-41-8  | 1.00E-04 | + | NA    | 3.23   | NA    | NA    | NA    | NA    | NA    | - | NA     |
| 148 | TP0001499B05 | Picloram                                                     | 6607        | 1.00E-04 | + | NA    | -13.00 | NA    | NA    | NA    | NA    | NA    | - | NA     |
| 149 | TP0001499B07 | Fludioxonil                                                  | 131341-86-1 | 1.00E-04 | + | NA    | 2.36   | -4.31 | NA    | NA    | NA    | -4.17 | - | NA     |
| 150 | TP0001500A01 | Acibenzolar-S-methyl                                         | 135158-54-2 | 1.00E-04 | + | NA    | 9.07   | NA    | NA    | NA    | NA    | NA    | - | NA     |
| 151 | TP0001500G02 | Azinphos-methyl                                              | 86-50-0     | 1.00E-04 | + | NA    | -2.63  | -4.50 | NA    | NA    | NA    | -3.99 | - | NA     |
| 152 | TP0001500F03 | Mancozeb                                                     | 2234562     | 5.00E-05 | + | NA    | 11.54  | NA    | NA    | NA    | NA    | NA    | - | NA     |
| 153 | TP0001500F04 | Boscalid                                                     | 188425-85-6 | 1.00E-04 | + | NA    | -3.30  | -4.81 | NA    | NA    | NA    | -3.30 | - | NA     |
| 154 | TP0001500C05 | Butachlor                                                    | 23184-66-9  | 1.00E-04 | + | NA    | -8.98  | -5.46 | NA    | NA    | NA    | -4.37 | - | NA     |
| 155 | TP0001500B07 | Tefluthrin                                                   | 79538-32-2  | 1.00E-04 | + | NA    | 6.59   | NA    | NA    | NA    | NA    | NA    | - | NA     |
| 156 | TP0001500G07 | Butafenacil                                                  | 134605-64-4 | 1.00E-04 | + | NA    | -3.64  | -4.58 | NA    | NA    | NA    | -4.04 | - | NA     |
| 157 | TP0001501A01 | Tralkoxydim                                                  | 87820-88-0  | 1.00E-04 | + | NA    | 10.76  | NA    | NA    | NA    | NA    | NA    | - | NA     |
| 158 | TP0001501C01 | Pyraflufen-ethyl                                             | 129630-19-9 | 1.00E-04 | + | NA    | -20.38 | -3.50 | NA    | NA    | NA    | -4.33 | - | NA     |
| 159 | TP0001501G02 | Prometon                                                     | 1610-18-0   | 1.00E-04 | + | NA    | -3.53  | NA    | NA    | NA    | NA    | NA    | - | NA     |
| 160 | TP0001501C03 | Vinclozolin                                                  | 50471-44-8  | 1.00E-04 | + | NA    | -2.76  | NA    | NA    | NA    | NA    | NA    | - | NA     |
| 161 | TP0001501F04 | 2-Phenylphenol                                               | 90-43-7     | 1.00E-04 | + | NA    | 0.77   | NA    | NA    | NA    | NA    | NA    | - | NA     |
| 162 | TP0001501G04 | Clomazone                                                    | 81777-89-1  | 1.00E-04 | + | NA    | -4.36  | NA    | NA    | NA    | NA    | NA    | - | NA     |
| 163 | TP0001501B05 | Flufenpyr-ethyl                                              | 188489-07-8 | 1.00E-04 | + | NA    | -8.15  | NA    | NA    | NA    | NA    | NA    | - | NA     |
| 164 | TP0001501D05 | Chlorpyrifos oxon                                            | 5598-15-2   | 9.50E-05 | + | NA    | -7.40  | -4.57 | NA    | NA    | NA    | -4.01 | - | NA     |
| 165 | TP0001501B08 | Fenhexamid                                                   | 126833-17-8 | 1.00E-04 | + | NA    | -2.35  | -4.39 | NA    | NA    | NA    | -4.15 | - | NA     |
| 166 | TP0001501B11 | Cycloate                                                     | 1134-23-2   | 1.00E-04 | + | NA    | 7.20   | NA    | NA    | NA    | NA    | NA    | - | NA     |
| 167 | TP0001502E01 | Naled                                                        | 300-76-5    | 1.00E-04 | + | NA    | -10.21 | -8.70 | NA    | NA    | NA    | NA    | - | NA     |
| 168 | TP0001502E03 | Linuron                                                      | 330-55-2    | 1.00E-04 | + | NA    | -3.50  | -8.92 | NA    | NA    | NA    | NA    | - | NA     |
| 169 | TP0001502C09 | EPTC                                                         | 759-94-4    | 1.00E-04 | + | NA    | -6.40  | NA    | NA    | NA    | NA    | NA    | - | NA     |
| 170 | TP0001498B01 | Bifenthrin                                                   | 82657-04-3  | 1.00E-04 | - | NA    | NA     | NA    | NA    | NA    | NA    | NA    | - | NA     |
| 171 | TP0001498C02 | Bentazone                                                    | 25057-89-0  | 1.00E-04 | - | NA    | NA     | NA    | NA    | NA    | NA    | NA    | - | NA     |
| 172 | TP0001498E02 | Mesotrione                                                   | 104206-82-8 | 1.00E-04 | - | NA    | NA     | NA    | NA    | NA    | NA    | NA    | - | NA     |
| 173 | TP0001498F02 | Esfenvalerate                                                | 66230-04-4  | 1.00E-04 | - | NA    | NA     | NA    | NA    | NA    | NA    | NA    | - | NA     |

|     |              |                                |             |           |   |    |    |    |    |    |    |    |    |
|-----|--------------|--------------------------------|-------------|-----------|---|----|----|----|----|----|----|----|----|
| 174 | TP0001498B03 | Thiophanate-methyl             | 23564-05-8  | 1.00E-04  | - | NA |
| 175 | TP0001498E03 | Trichlorfon                    | 52-68-6     | 1.00E-04  | - | NA |
| 176 | TP0001498B04 | Carbaryl                       | 63-25-2     | 1.00E-04  | - | NA |
| 177 | TP0001498D04 | 2,4-Dichlorophenoxyacetic acid | 94-75-7     | 1.00E-04  | - | NA |
| 178 | TP0001498F04 | Boric acid                     | 10043-35-3  | 1.00E-04  | - | NA |
| 179 | TP0001498G04 | Dichlorprop                    | 120-36-5    | 1.00E-04  | - | NA |
| 180 | TP0001498C05 | Dicrctophos                    | 141-66-2    | 1.00E-04  | - | NA |
| 181 | TP0001498E05 | Butylate                       | 2008-41-5   | 1.00E-04  | - | NA |
| 182 | TP0001498C07 | Dimethylarsinic acid           | 75-60-5     | 1.00E-04  | - | NA |
| 183 | TP0001498E07 | Dichlorvos                     | 62-73-7     | 5.00E-05  | - | NA |
| 184 | TP0001498G07 | Malaaxon                       | 1634-78-2   | 1.00E-04  | - | NA |
| 185 | TP0001498C08 | Cyanazine                      | 21725-46-2  | 1.00E-04  | - | NA |
| 186 | TP0001498F08 | Methomyl                       | 16752-77-5  | 1.00E-04  | - | NA |
| 187 | TP0001498D09 | PFOA                           | 335-67-1    | 1.00E-04  | - | NA |
| 188 | TP0001498E09 | Propoxur                       | 114-26-1    | 1.00E-04  | - | NA |
| 189 | TP0001498F09 | Imazethapyr                    | 81335-77-5  | 1.00E-04  | - | NA |
| 190 | TP0001498B10 | Imidacloprid                   | 138261-41-3 | 1.00E-04  | - | NA |
| 191 | TP0001498E10 | Fenamiphos                     | 22224-92-6  | 1.00E-04  | - | NA |
| 192 | TP0001498F10 | Clopyralid                     | 1702-17-6   | 1.00E-04  | - | NA |
| 193 | TP0001498G10 | Metalaxyl                      | 57837-19-1  | 1.00E-04  | - | NA |
| 194 | TP0001498F11 | Monocrotophos                  | 6923-22-4   | 1.00E-04  | - | NA |
| 195 | TP0001498G11 | Indoxacarb                     | 173584-44-6 | 8.00E-05  | - | NA |
| 196 | TP0001499B02 | Acephate                       | 30560-19-1  | 1.00E-04  | - | NA |
| 197 | TP0001499C02 | Anilazine                      | 101-05-3    | 1.00E-04* | - | NA |
| 198 | TP0001499F02 | Diuron                         | 330-54-1    | 1.00E-04  | - | NA |
| 199 | TP0001499C03 | Clofentezine                   | 74115-24-5  | 1.00E-04* | - | NA |
| 200 | TP0001499D03 | Methamidophos                  | 10265-92-6  | 1.00E-04  | - | NA |
| 201 | TP0001499F03 | Thiamethoxam                   | 153719-23-4 | 1.00E-04  | - | NA |
| 202 | TP0001499B04 | Formetanate hydrochloride      | 23422-53-9  | 1.00E-04  | - | NA |
| 203 | TP0001499C04 | Fluometuron                    | 2164-17-2   | 1.00E-04  | - | NA |
| 204 | TP0001499D04 | Difenzoquat metilsulfate       | 43222-48-6  | 1.00E-04  | - | NA |
| 205 | TP0001499E04 | Bendiocarb                     | 22781-23-3  | 1.00E-04  | - | NA |
| 206 | TP0001499F04 | Alachlor                       | 15972-60-8  | 1.00E-04  | - | NA |
| 207 | TP0001499G04 | Dimethenamid                   | 87674-68-8  | 1.00E-04  | - | NA |
| 208 | TP0001499C05 | 2,4-Dichlorophenoxyacetic acid | 94-75-7     | 1.00E-04  | - | NA |
| 209 | TP0001499D05 | Ethylene thiourea              | 96-45-7     | 1.00E-04  | - | NA |
| 210 | TP0001499E05 | Azamethiphos                   | 35575-96-3  | 1.00E-04  | - | NA |
| 211 | TP0001499F05 | Dazomet                        | 533-74-4    | 1.00E-04  | - | NA |
| 212 | TP0001499G05 | Pyrimethanil                   | 53112-28-0  | 1.00E-04  | - | NA |
| 213 | TP0001499D07 | Propyzamide                    | 23950-58-5  | 1.00E-04  | - | NA |
| 214 | TP0001499E07 | Triadimenol                    | 55219-65-3  | 1.00E-04  | - | NA |
| 215 | TP0001499F07 | Pirimicarb                     | 23103-98-2  | 1.00E-04  | - | NA |
| 216 | TP0001499G07 | Isoxaben                       | 82558-50-7  | 1.00E-04  | - | NA |
| 217 | TP0001499B08 | Acetochlor                     | 34256-82-1  | 1.00E-04  | - | NA |
| 218 | TP0001499E08 | Acifluorfen                    | 50594-66-6  | 1.00E-04  | - | NA |
| 219 | TP0001499F08 | Tepraloxydim                   | 149979-41-9 | 1.00E-04  | - | NA |
| 220 | TP0001499G08 | Clopyralid-olamine             | 57754-85-5  | 1.00E-04  | - | NA |
| 221 | TP0001499B09 | 2,4-DB                         | 94-82-6     | 1.00E-04  | - | NA |
| 222 | TP0001499D09 | Hexazinone                     | 51235-04-2  | 1.00E-04  | - | NA |
| 223 | TP0001499F09 | Tebuthiuron                    | 34014-18-1  | 1.00E-04  | - | NA |
| 224 | TP0001499G09 | Iprodione                      | 36734-19-7  | 1.00E-04  | - | NA |
| 225 | TP0001499B10 | Dicamba                        | 1918-00-9   | 1.00E-04  | - | NA |
| 226 | TP0001499C10 | Methyl parathion               | 298-00-0    | 1.00E-04  | - | NA |
| 227 | TP0001499D10 | Fluroxypyr                     | 69377-81-7  | 1.00E-04  | - | NA |
| 228 | TP0001499C11 | Dimethomorph                   | 110488-70-5 | 1.00E-04  | - | NA |
| 229 | TP0001499D11 | Benomyl                        | 17804-35-2  | 1.00E-04  | - | NA |
| 230 | TP0001499F11 | Monomethyl phthalate           | 4376-18-5   | 1.00E-04  | - | NA |
| 231 | TP0001499H12 | Diazinon                       | 333-41-5    | 1.00E-04  | - | NA |
| 232 | TP0001500B01 | Cyclanilide                    | 113136-77-9 | 1.00E-04  | - | NA |
| 233 | TP0001500C01 | Cyanamide                      | 420-04-2    | 1.00E-04  | - | NA |
| 234 | TP0001500D01 | Ethoprop                       | 13194-48-4  | 1.00E-04  | - | NA |
| 235 | TP0001500C02 | Penoxsulam                     | 219714-96-2 | 1.00E-04* | - | NA |
| 236 | TP0001500D02 | Clothianidin                   | 210880-92-5 | 1.00E-04  | - | NA |
| 237 | TP0001500E02 | Di(2-ethylhexyl) phthalate     | 117-81-7    | 1.00E-04  | - | NA |
| 238 | TP0001500B03 | Acetamidprid                   | 135410-20-7 | 1.00E-04  | - | NA |
| 239 | TP0001500C03 | Novaluron                      | 116714-46-6 | 1.00E-04* | - | NA |
| 240 | TP0001500E03 | Isoxaflutole                   | 141112-29-0 | 1.00E-04  | - | NA |

|     |              |                                    |             |           |   |    |    |    |    |    |    |    |    |
|-----|--------------|------------------------------------|-------------|-----------|---|----|----|----|----|----|----|----|----|
| 241 | TP0001500B04 | Imazamox                           | 114311-32-9 | 1.00E-04  | - | NA |
| 242 | TP0001500E04 | Sulfentrazone                      | 122836-35-5 | 1.00E-04  | - | NA |
| 243 | TP0001500F05 | Cyproconazole                      | 94361-06-5  | 9.50E-05  | - | NA |
| 244 | TP0001500C07 | Pymetrozine                        | 123312-89-0 | 1.00E-04  | - | NA |
| 245 | TP0001500C08 | Spiroxamine                        | 118134-30-8 | 1.00E-04  | - | NA |
| 246 | TP0001500D08 | Quinclorac                         | 84087-01-4  | 1.00E-04  | - | NA |
| 247 | TP0001500F08 | Triclopyr                          | 55335-06-3  | 1.00E-04  | - | NA |
| 248 | TP0001500B10 | Propamocarb hydrochloride          | 25606-41-1  | 1.00E-04  | - | NA |
| 249 | TP0001500C10 | Monobutyl phthalate                | 131-70-4    | 1.00E-04  | - | NA |
| 250 | TP0001500D10 | Pentachloronitrobenzene            | 82-68-8     | 1.00E-04  | - | NA |
| 251 | TP0001500F10 | Flufenacet                         | 142459-58-3 | 1.00E-04  | - | NA |
| 252 | TP0001500G10 | Imazapyr                           | 81334-34-1  | 1.00E-04  | - | NA |
| 253 | TP0001500B11 | Trifloxysulfuron-sodium            | 199119-58-9 | 1.00E-04* | - | NA |
| 254 | TP0001500C11 | Propazine                          | 139-40-2    | 1.00E-04  | - | NA |
| 255 | TP0001500H12 | Thiacloprid                        | 111988-49-9 | 1.00E-04  | - | NA |
| 256 | TP0001501G01 | 2-Methoxyethanol                   | 109-86-4    | 1.00E-04  | - | NA |
| 257 | TP0001501B02 | Chloridazon                        | 1698-60-8   | 1.00E-04  | - | NA |
| 258 | TP0001501F02 | Asulam                             | 3337-71-1   | 1.00E-04  | - | NA |
| 259 | TP0001501B03 | Pyriithiobac-sodium                | 123343-16-8 | 1.00E-04  | - | NA |
| 260 | TP0001501F03 | Deisopropylatrazine                | 1007-28-9   | 1.00E-04  | - | NA |
| 261 | TP0001501B04 | Molinate                           | 2212-67-1   | 1.00E-04  | - | NA |
| 262 | TP0001501E04 | Oxytetracycline dihydrate          | 6153-64-6   | 1.00E-04  | - | NA |
| 263 | TP0001501C05 | Spirodiclofen                      | 148477-71-8 | 1.00E-04  | - | NA |
| 264 | TP0001501F05 | Carboxin                           | 5234-68-4   | 1.00E-04  | - | NA |
| 265 | TP0001501G05 | Oxamyl                             | 23135-22-0  | 1.00E-04  | - | NA |
| 266 | TP0001501B07 | Symclosene                         | 87-90-1     | 1.00E-04  | - | NA |
| 267 | TP0001501C07 | Fosthiazate                        | 98886-44-3  | 1.00E-04  | - | NA |
| 268 | TP0001501D07 | Sethoxydim                         | 74051-80-2  | 1.00E-04  | - | NA |
| 269 | TP0001501G07 | Dimethoate                         | 60-51-5     | 1.00E-04  | - | NA |
| 270 | TP0001501C08 | MCPA                               | 94-74-6     | 1.00E-04  | - | NA |
| 271 | TP0001501D08 | Paclobutrazol                      | 76738-62-0  | 1.00E-04  | - | NA |
| 272 | TP0001501E08 | Dipropyl 2,5-pyridinedicarboxylate | 136-45-8    | 1.00E-04  | - | NA |
| 273 | TP0001501F08 | Methyl isothiocyanate              | 556-61-6    | 1.00E-04  | - | NA |
| 274 | TP0001501G08 | DEET                               | 134-62-3    | 1.00E-04  | - | NA |
| 275 | TP0001501B09 | Cyromazine                         | 66215-27-8  | 1.00E-04  | - | NA |
| 276 | TP0001501D09 | Imazaquin                          | 81335-37-7  | 1.00E-04  | - | NA |
| 277 | TP0001501E09 | Metribuzin                         | 21087-64-9  | 1.00E-04  | - | NA |
| 278 | TP0001501F09 | Flumetsulam                        | 98967-40-9  | 1.00E-04  | - | NA |
| 279 | TP0001501C10 | Triadimefon                        | 43121-43-3  | 1.00E-04  | - | NA |
| 280 | TP0001501E10 | Metolachlor                        | 51218-45-2  | 1.00E-04  | - | NA |
| 281 | TP0001501F10 | Permethrin                         | 52645-53-1  | 1.00E-04  | - | NA |
| 282 | TP0001501D11 | Terbacil                           | 5902-51-2   | 1.00E-04  | - | NA |
| 283 | TP0001501F11 | Triadimenol                        | 55219-65-3  | 1.00E-04  | - | NA |
| 284 | TP0001501H12 | Etridiazole                        | 2593-15-9   | 1.00E-04  | - | NA |
| 285 | TP0001502C01 | Propoxycarbazone-sodium            | 181274-15-7 | 1.00E-04  | - | NA |
| 286 | TP0001502D01 | Mevinphos                          | 7786-34-7   | 1.00E-04  | - | NA |
| 287 | TP0001502F01 | Bromacil                           | 314-40-9    | 1.00E-04  | - | NA |
| 288 | TP0001502B02 | Metam-sodium hydrate               | 6734-80-1   | 1.00E-04  | - | NA |
| 289 | TP0001502C02 | 2,4-Dichlorophenoxyacetic acid     | 94-75-7     | 1.00E-04  | - | NA |
| 290 | TP0001502D02 | Thiabendazole                      | 148-79-8    | 1.00E-04  | - | NA |
| 291 | TP0001502C03 | Atrazine                           | 1912-24-9   | 1.00E-04  | - | NA |
| 292 | TP0001502C05 | 2-Phenoxyethanol                   | 122-99-6    | 1.00E-04  | - | NA |
| 293 | TP0001502D05 | Icaridin                           | 119515-38-7 | 1.00E-04  | - | NA |
| 294 | TP0001502E05 | Imazapic                           | 104098-48-8 | 1.00E-04  | - | NA |
| 295 | TP0001502G05 | Aldicarb                           | 116-06-3    | 1.00E-04  | - | NA |
| 296 | TP0001502D07 | Triticonazole                      | 131983-72-7 | 9.50E-05  | - | NA |
| 297 | TP0001502B08 | Diazoxon                           | 962-58-3    | 1.00E-04  | - | NA |
| 298 | TP0001502C08 | Maleic hydrazide                   | 123-33-1    | 1.00E-04  | - | NA |
| 299 | TP0001502D08 | Daminozide                         | 1596-84-5   | 1.00E-04  | - | NA |
| 300 | TP0001502F08 | Mepiquat chloride                  | 24307-26-4  | 1.00E-04  | - | NA |
| 301 | TP0001502G08 | Norflurazon                        | 27314-13-2  | 1.00E-04  | - | NA |
| 302 | TP0001502B09 | Chloroneb                          | 2675-77-6   | 1.00E-04  | - | NA |
| 303 | TP0001502E09 | Ethephon                           | 16672-87-0  | 1.00E-04  | - | NA |
| 304 | TP0001502C10 | Iodosulfuron-methyl-sodium         | 144550-36-7 | 1.00E-04  | - | NA |
| 305 | TP0001502D10 | Simazine                           | 122-34-9    | 1.00E-04  | - | NA |
| 306 | TP0001502G10 | MEHP                               | 4376-20-9   | 1.00E-04  | - | NA |
| 307 | TP0001502B11 | Cymoxanil                          | 57966-95-7  | 1.00E-04  | - | NA |

*Part II. Supplemental Figure S1-S3, Table S1-S5*

|     |              |                              |           |          |   |    |    |    |    |    |    |    |    |
|-----|--------------|------------------------------|-----------|----------|---|----|----|----|----|----|----|----|----|
| 308 | TP0001502E11 | Diquat dibromide monohydrate | 6385-62-2 | 5.00E-05 | - | NA |
| 309 | TP0001502F11 | Dimethyl phthalate           | 131-11-3  | 1.00E-04 | - | NA |
| 310 | TP0001502H12 | Dichlobenil                  | 1194-65-6 | 1.00E-04 | - | NA |

---



**Table S2. Control chemicals included on each assay plate**

| Control Chemical                    | DMSO            | 2,4-D            | DCNQ                                   | NaClO <sub>4</sub>                 | NaNO <sub>3</sub>                             | NaSCN                                         |
|-------------------------------------|-----------------|------------------|----------------------------------------|------------------------------------|-----------------------------------------------|-----------------------------------------------|
| CAS No.                             | 67-68-5         | 94-75-7          | 117-80-6                               | 7601-89-0                          | 7631-99-4                                     | 540-72-7                                      |
| Purity (%)                          | 99.9            | 98               | 98                                     | 98                                 | 99                                            | 98                                            |
| Purpose                             | Vehicle control | Negative control | Cell viability assay, positive control | RAIU assay, positive control       | RAIU assay, positive control (20% inhibition) | RAIU assay, positive control (80% inhibition) |
| Concentration (% or M)              | 0.5%            | 1E-4             | 1E-9, 1E-8, 1E-7, 1E-6, 1E-5, 1E-4     | 1E-9, 1E-8, 1E-7, 1E-6, 1E-5, 1E-4 | 1E-4                                          | 1E-4                                          |
| Reps*/plate in Single-Con Screening | 12              | 2                | 3 for 1E-4M, 1 for the rest            | 6 for 1E-4M, 2 for the rest        | 2                                             | 2                                             |
| Reps*/plate in Multi-Con Screening  | 8               | 2                | 3 for 1E-4M, 1 for the rest            | 6 for 1E-4M, 2 for the rest        | 2                                             | 2                                             |

\*Number of wells

**Table S3. Summary of assay performance metrics for single-concentration and multi-concentration screening**

| Assay <sup>1</sup>       | CV of DMSO    |                | Z' Score    |             | AC50 of positive control <sup>2</sup> |               |
|--------------------------|---------------|----------------|-------------|-------------|---------------------------------------|---------------|
|                          | mean±SD       | range          | mean±SD     | range       | mean±SD                               | range         |
| Single-con RAIU          | 7.14% ± 1.56% | 4.91% - 11.04% | 0.77 ± 0.05 | 0.65 - 0.84 | -6.44 ± 0.11                          | -6.56 - -6.06 |
| Multi-con RAIU           | 8.61% ± 1.01% | 6.70% - 11.50% | 0.72 ± 0.03 | 0.64 - 0.78 | -6.38 ± 0.13                          | -6.57 - -6.04 |
| Multi-con Cell Viability | 5.42% ± 1.47% | 2.80% - 9.53%  | n.a.        | n.a.        | -4.83 ± 0.12                          | -4.92 - -4.47 |

1: All metrics were calculated per assay plate (single-con: n=15, multi-con: n=54) and summarized separately for single-concentration and multi-concentration screenings.

2: AC50 of positive controls were calculated from the dose-responses of NaClO<sub>4</sub> and DCNQ for RAIU and cell viability assay respectively. Unit: logM.

n.a.: unable to calculate.

**Table S4. Summary of normalized responses of control chemicals across all plates**

| Assay <sup>1</sup>              | DMSO          | 2,4-D        | DCNQ <sup>2</sup><br>(1E-4M) | NaClO <sub>4</sub> <sup>2</sup><br>(1E-4M) | NaNO <sub>3</sub> | NaSCN        |
|---------------------------------|---------------|--------------|------------------------------|--------------------------------------------|-------------------|--------------|
| <b>single-con RAIU</b>          | 100.63 ± 7.11 | 92.41 ± 4.24 | n.a.                         | 2.85 ± 0.36                                | 81.25 ± 7.56      | 20.64 ± 1.12 |
| <b>multi-con RAIU</b>           | 99.5 ± 8.28   | 90.86 ± 4.49 | 3.92 ± 3.37                  | 3.28 ± 0.38                                | 83.08 ± 7.17      | 24.69 ± 2.71 |
| <b>multi-con Cell Viability</b> | 100.92 ± 5.41 | 99.34 ± 3.21 | 3.72 ± 0.38                  | 99.19 ± 4.69                               | 98.95 ± 5.43      | 104.3 ± 3.98 |

Mean ± S.D.

n.a.: not available as DCNQ was not included in the single-concentration screening.

1. Data were calculated by collecting normalized response for each chemical from all assay plates. Values represent the percent of control activity. 2,4-D, NaNO<sub>3</sub>, and NaSCN were at a concentration of 100 μM.

2. For DCNQ and NaClO<sub>4</sub>, though they were included on each assay plate in six concentrations, only the responses from 100 μM concentration are summarized in this table.

**Table S5. Range of AC50 for 10 internal replicated chemicals in ToxCast phase I\_v2 library**

| Name              | Min   | Max   | Range |
|-------------------|-------|-------|-------|
| Dibutyl phthalate | -4.54 | -4.53 | -0.02 |
| PFOS              | -4.75 | -4.72 | -0.02 |
| Oryzalin          | -4.38 | -4.35 | -0.03 |
| Bisphenol A       | -4.36 | -4.30 | -0.06 |
| Bensulide         | -4.42 | -4.31 | -0.11 |
| Triclosan         | -5.06 | -4.92 | -0.14 |
| Mancozeb          | -4.92 | -4.75 | -0.17 |
| Azoxystrobin      | -4.58 | -4.39 | -0.19 |
| Clorophene        | -4.87 | -4.64 | -0.22 |
| Allethrin         | -4.52 | -4.27 | -0.24 |

**Part III. Dose-response of all chemicals tested in multi-concentration  
with plots ordered by ranking scores**

1. SPID: TP0001500G04

NAME: Etoxazole

CAS NO: 153233-91-1

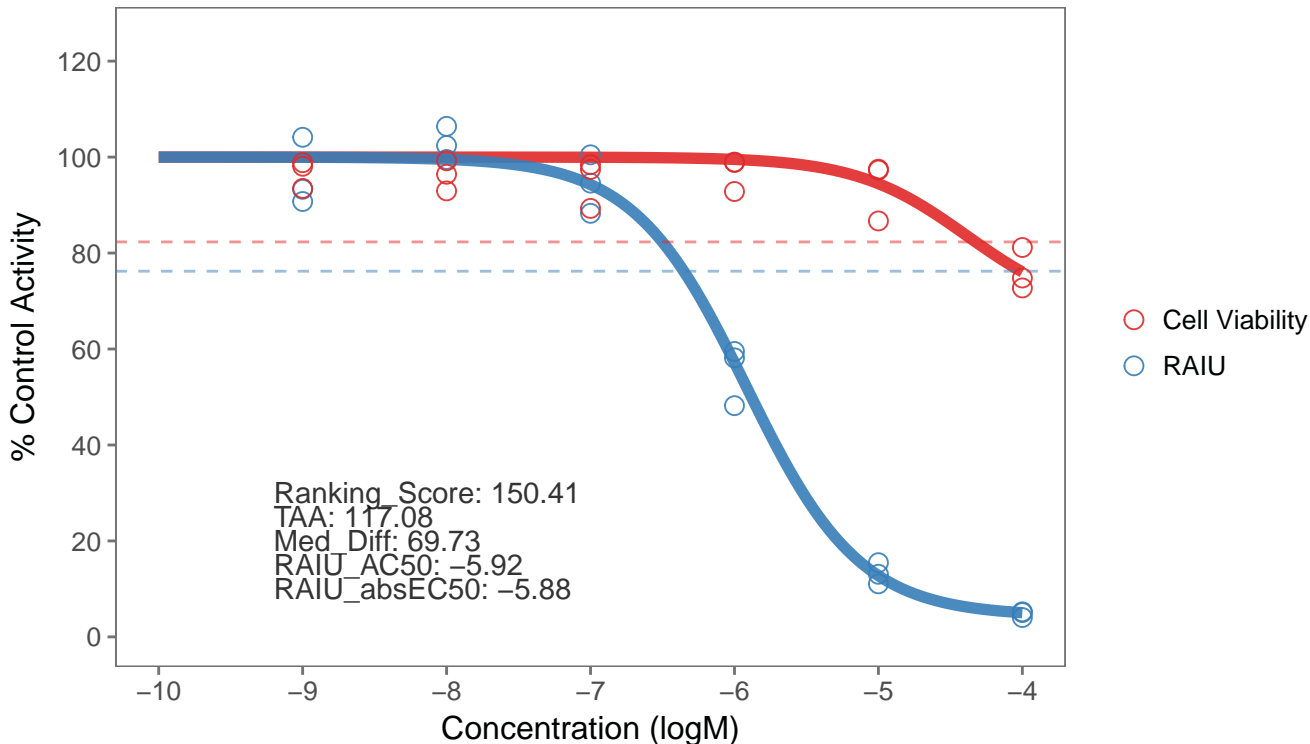

2. SPID: TP0001502E10  
NAME: Triphenyltin hydroxide  
CAS NO: 76-87-9

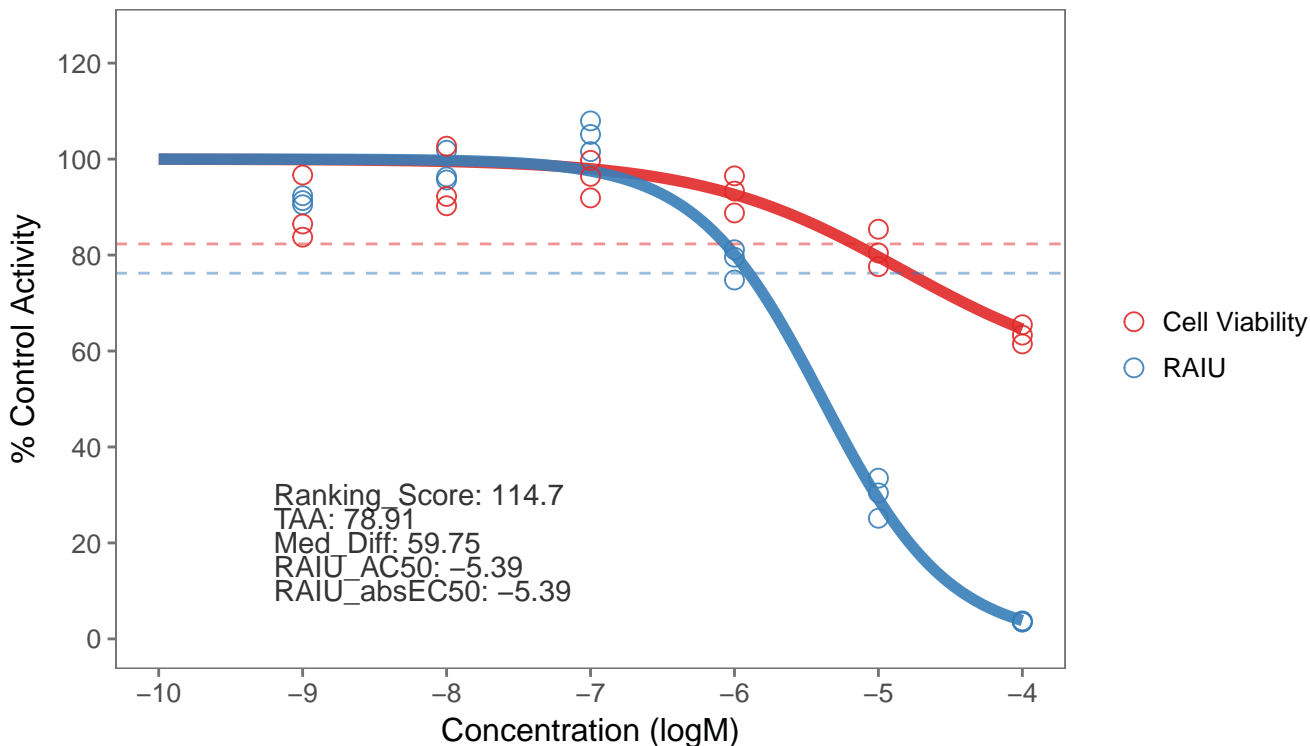

3. SPID: TP0001501D03  
NAME: Niclosamide  
CAS NO: 50-65-7

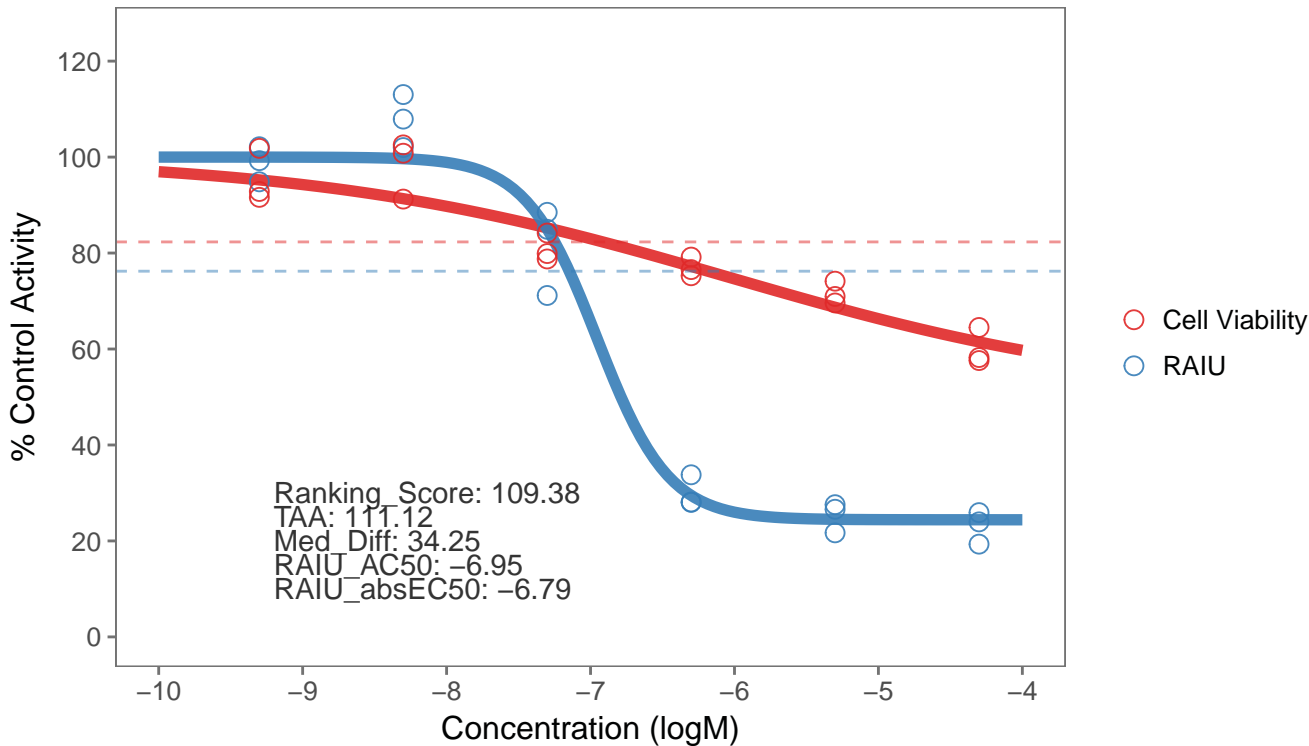



4. SPID: TP0001502G01

NAME: 3-Iodo-2-propynyl-N-butylcarbamate

CAS NO: 55406-53-6

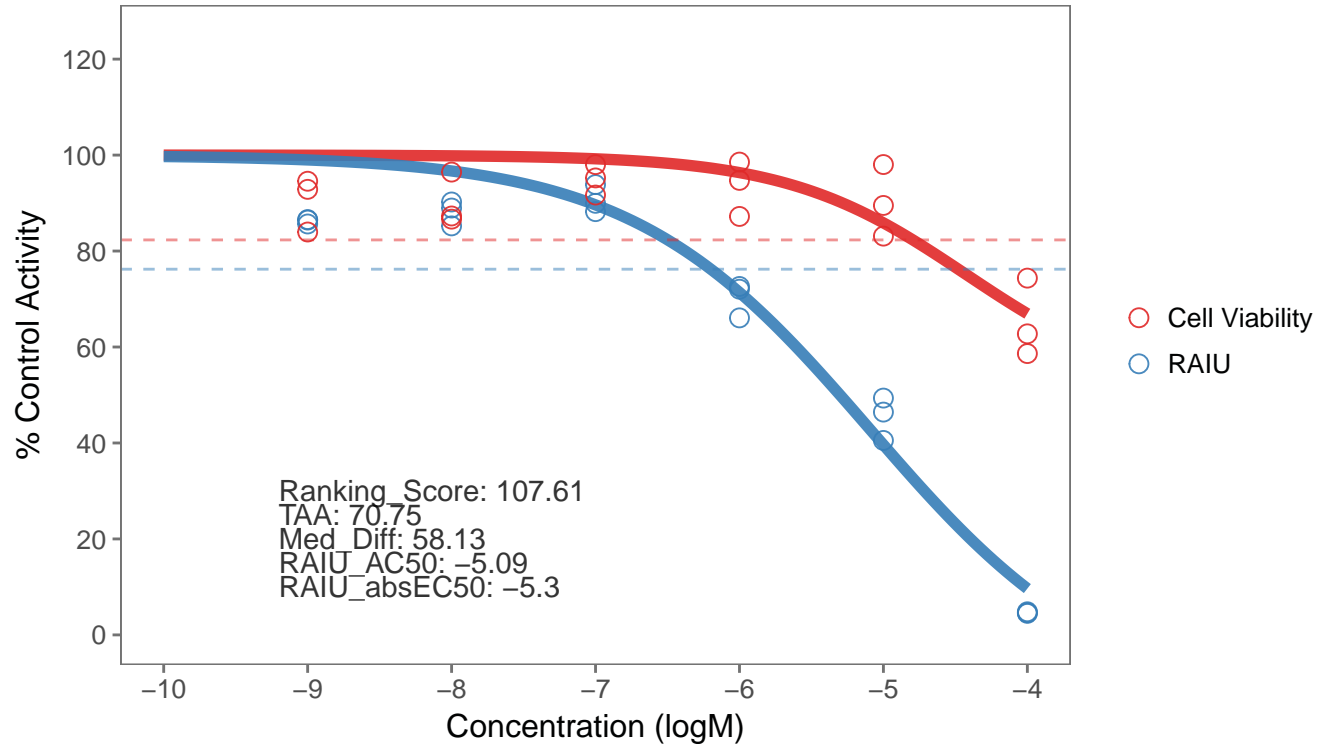

5. SPID: TP0001501E07  
NAME: PFOS  
CAS NO: 1763-23-1

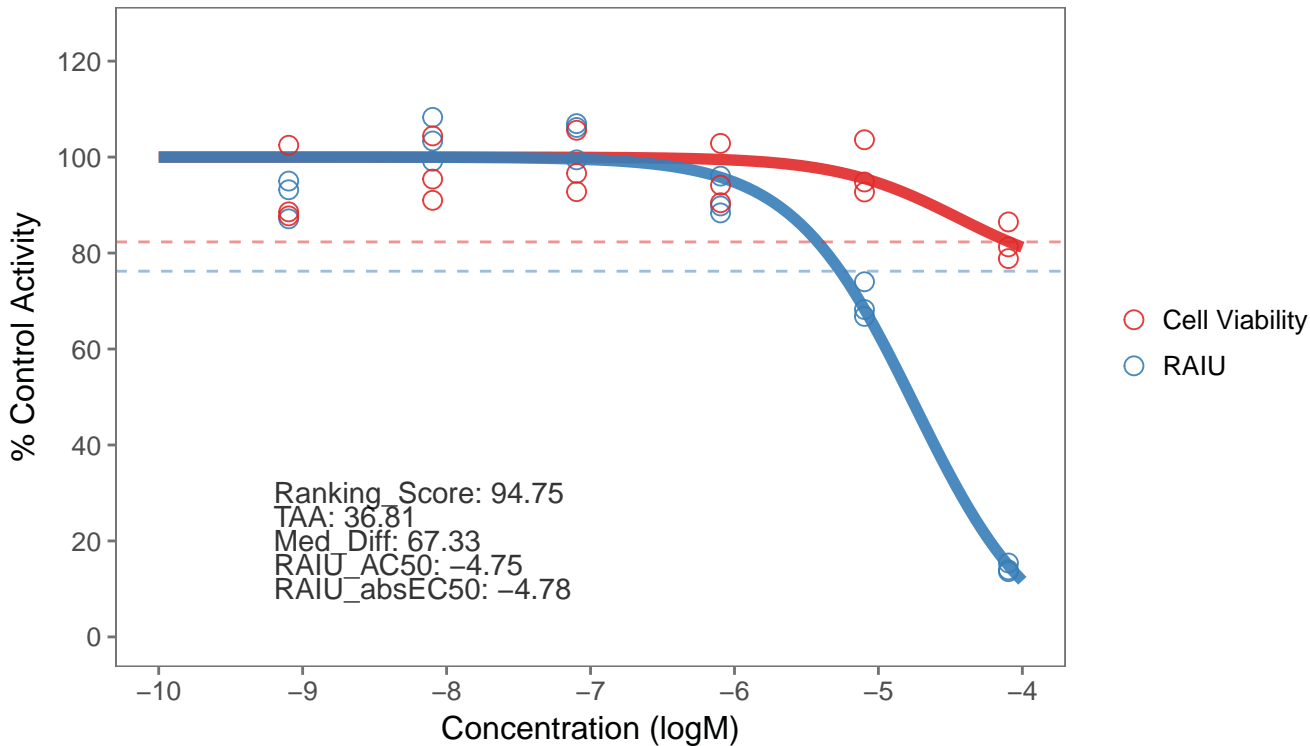

6. SPID: TP0001498G01

NAME: PFOS

CAS NO: 1763-23-1

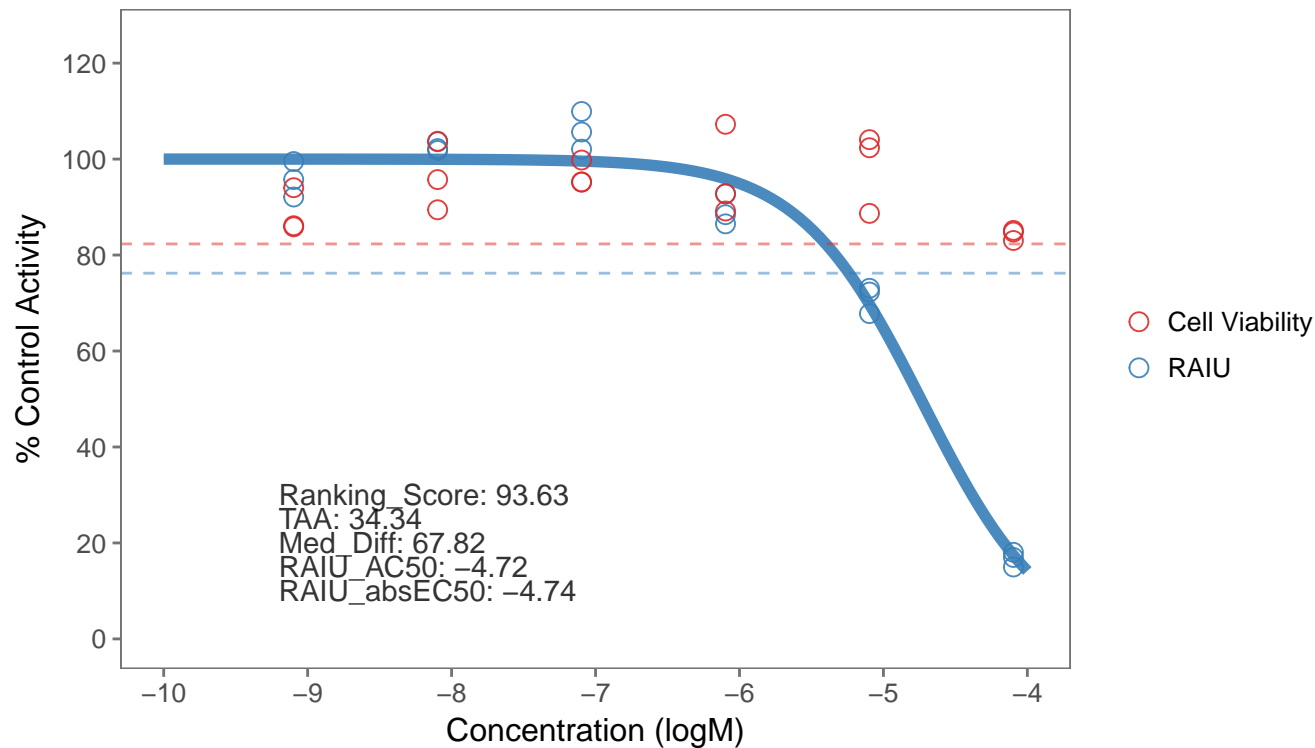

7. SPID: TP0001498B02

NAME: Cyprodinil

CAS NO: 121552-61-2

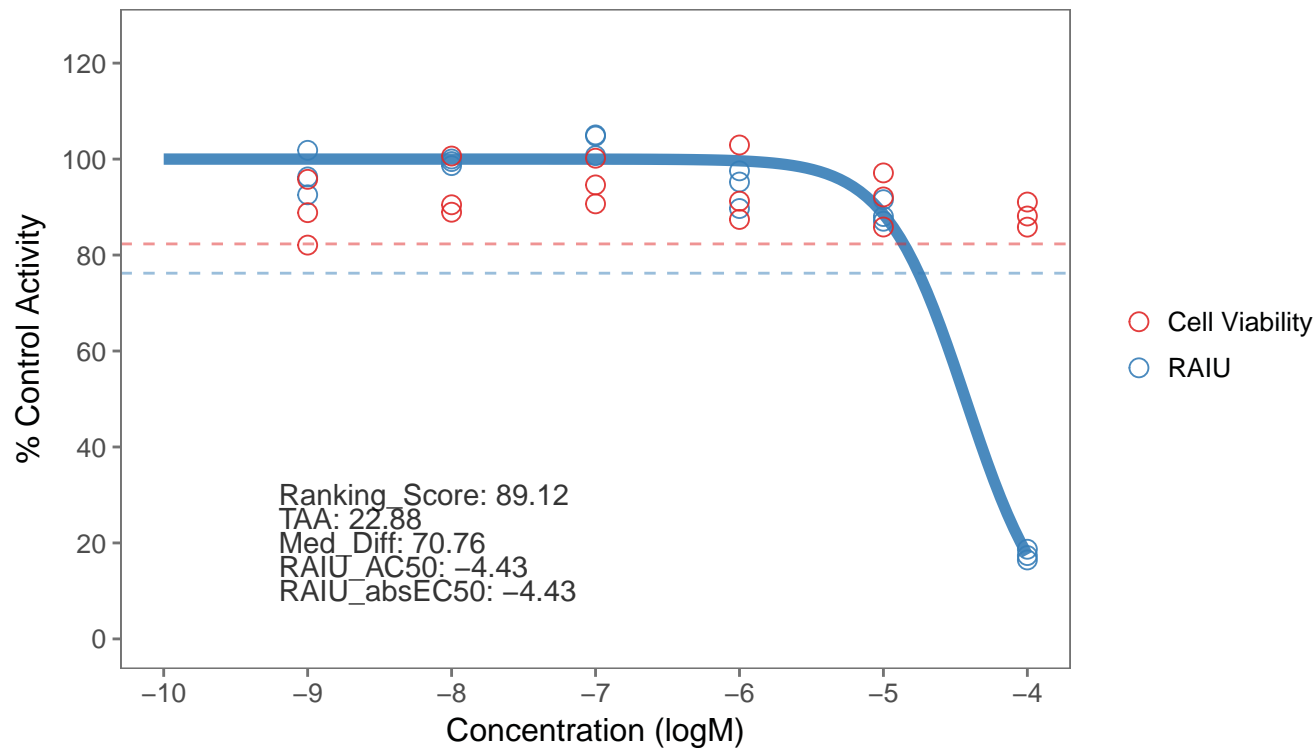

8. SPID: TP0001501G03

NAME: Rotenone

CAS NO: 83-79-4

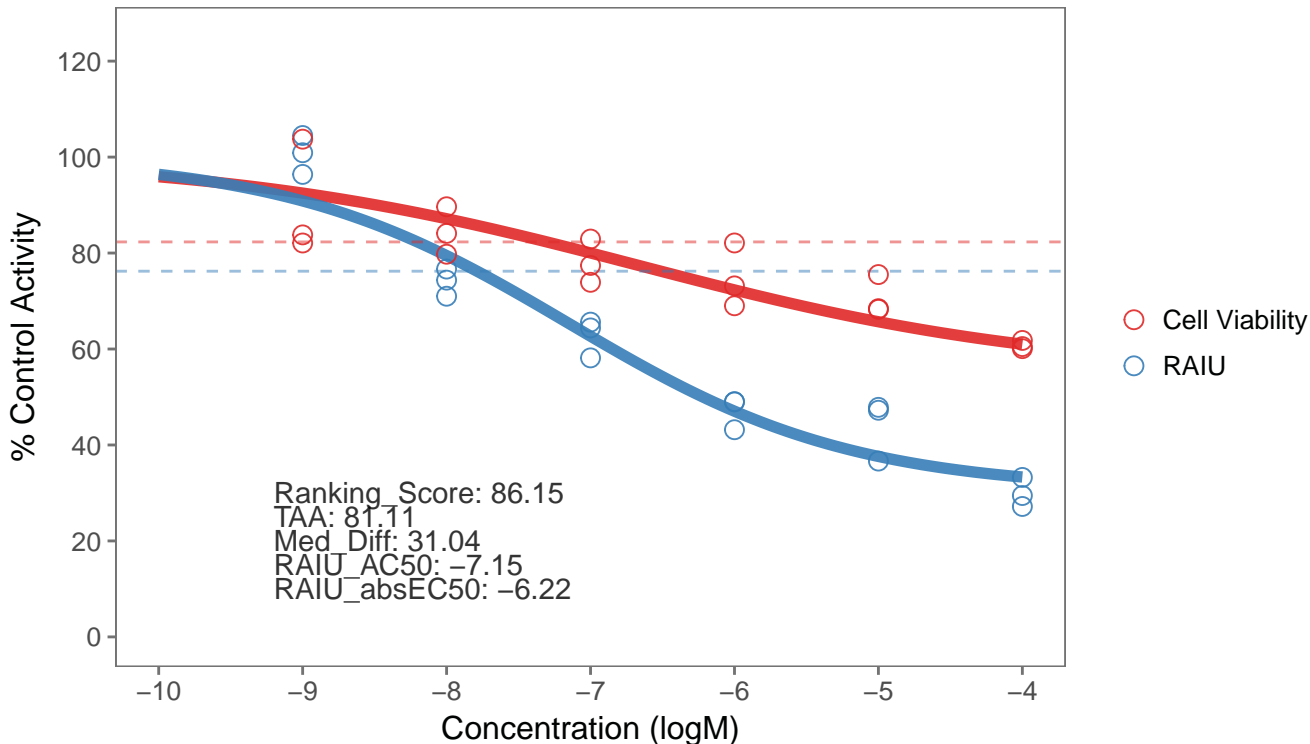

9. SPID: TP0001501C09

NAME: Pyridaben

CAS NO: 96489-71-3

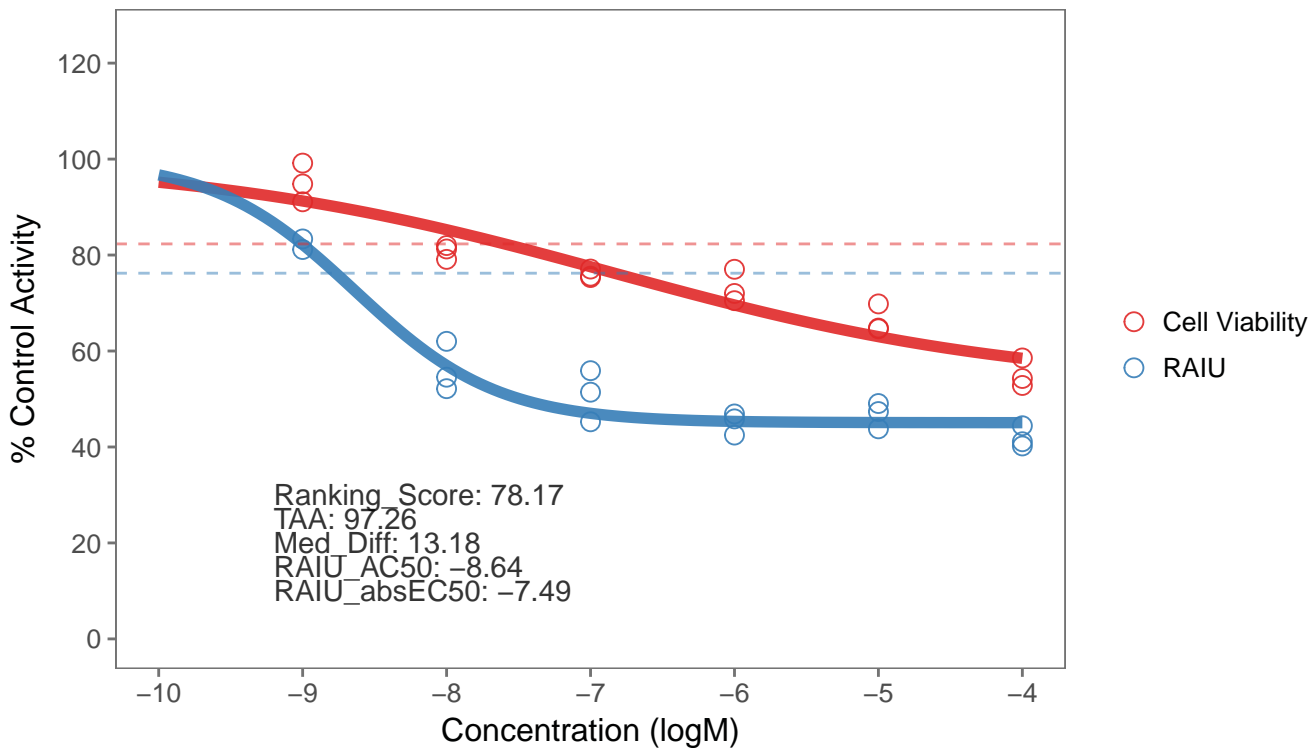

10. SPID: TP0001500E11  
NAME: Methoxyfenozide  
CAS NO: 161050-58-4

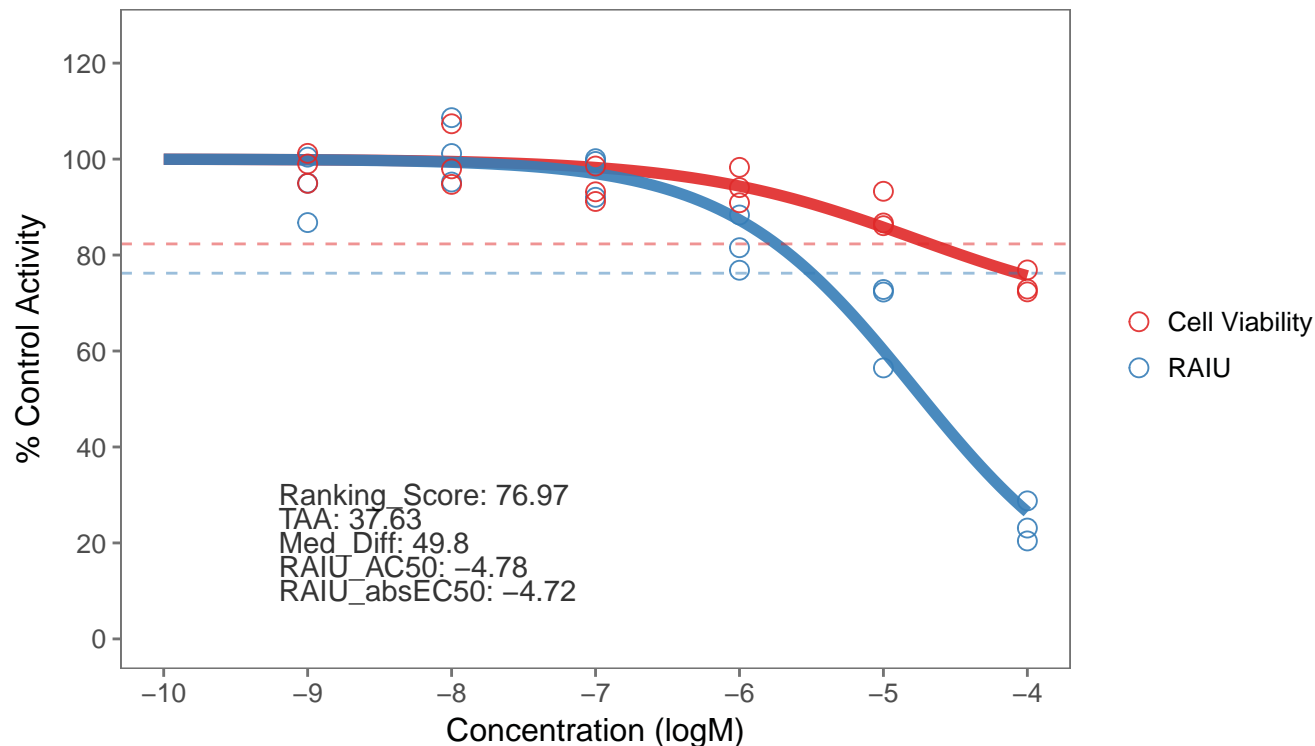

11. SPID: TP0001500E05  
NAME: 2-(Thiocyanomethylthio)benzothiazole  
CAS NO: 21564-17-0

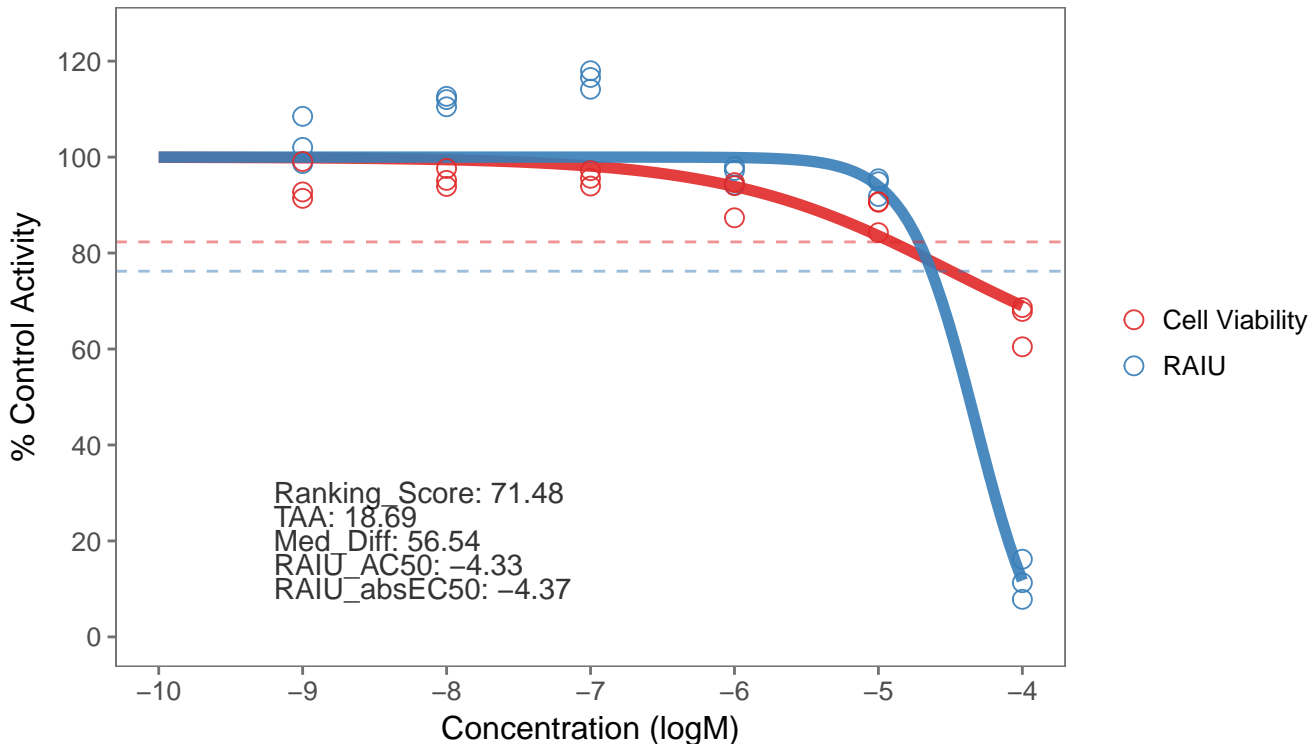



12. SPID: TP0001500D09

NAME: Oxyfluorfen

CAS NO: 42874-03-3

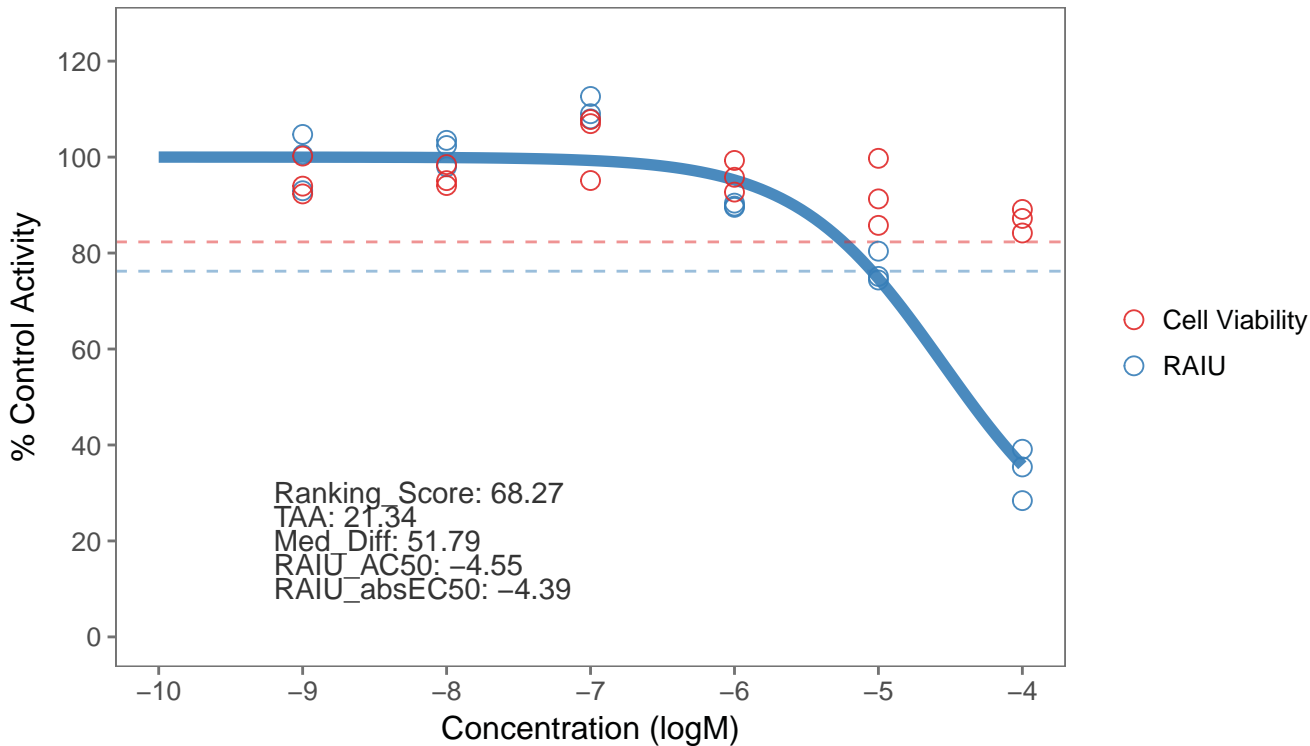

13. SPID: TP0001499D08

NAME: Captan

CAS NO: 133-06-2

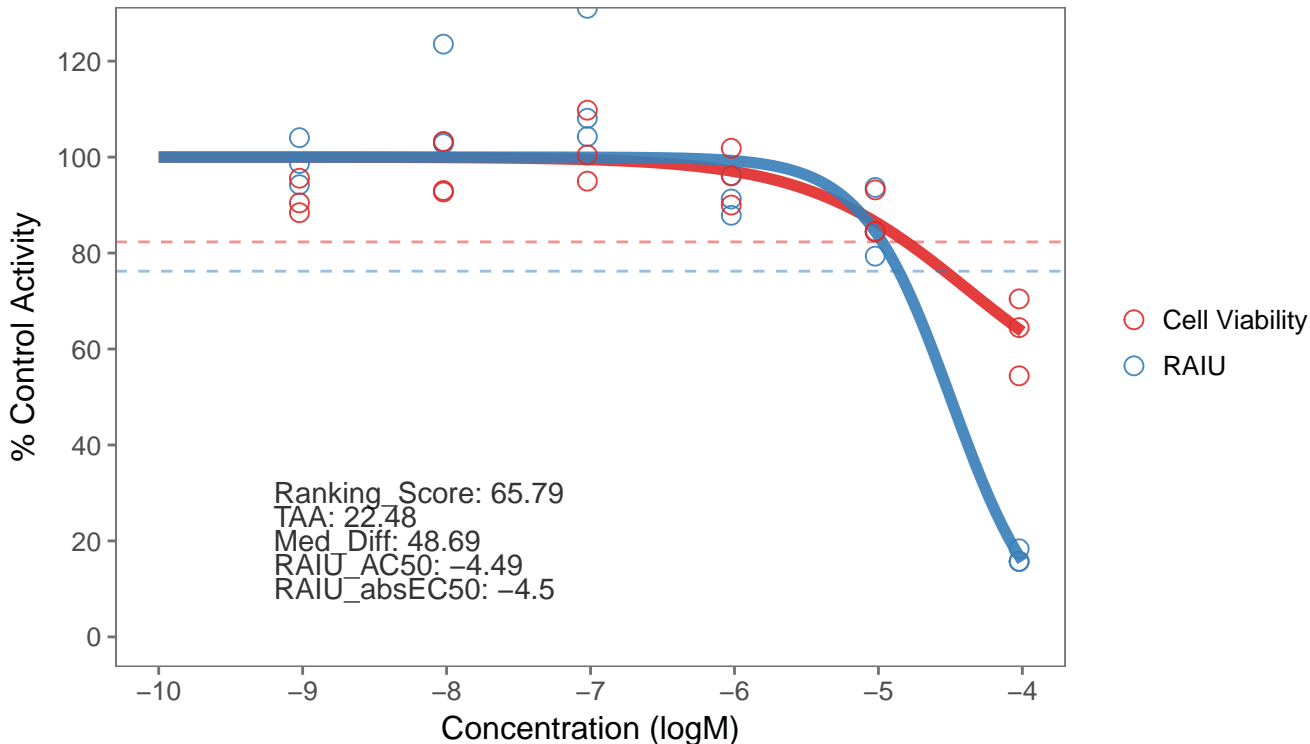

14. SPID: TP0001502F03  
NAME: Fipronil  
CAS NO: 120068-37-3

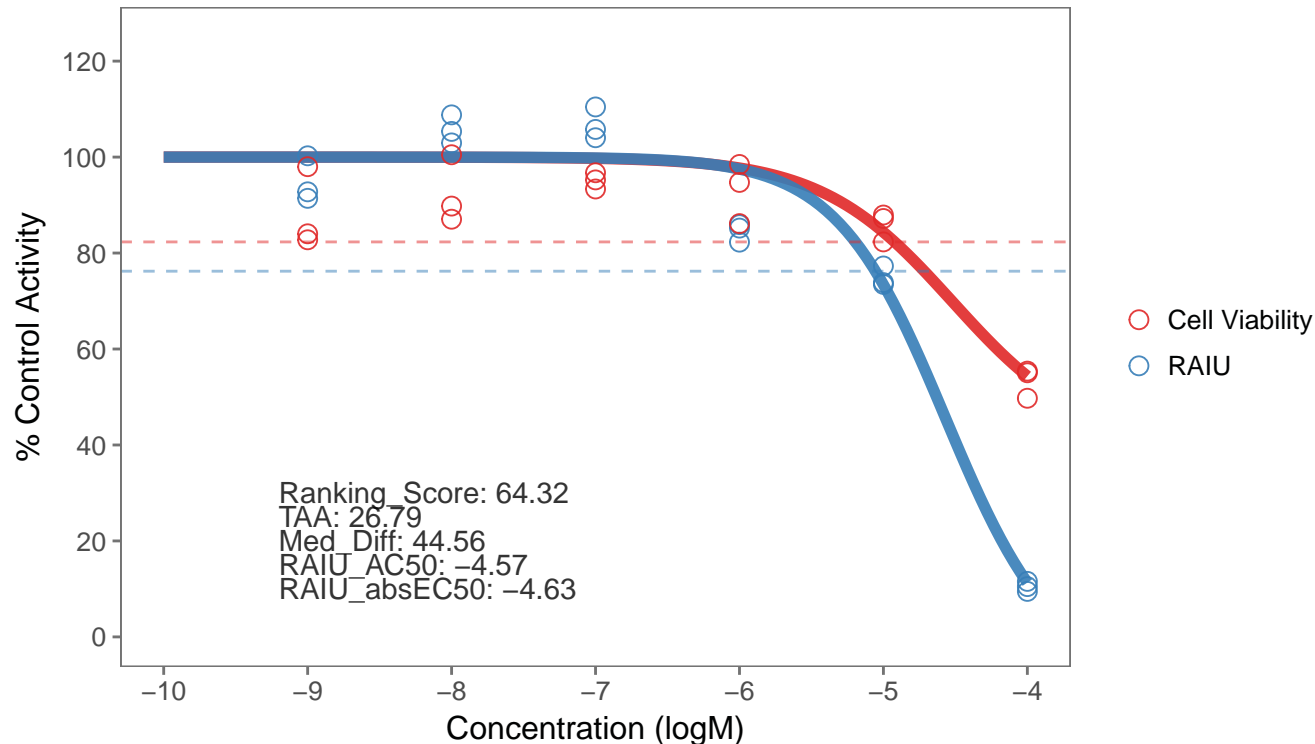

15. SPID: TP0001502E07  
NAME: Fluroxypyr-meptyl  
CAS NO: 81406-37-3

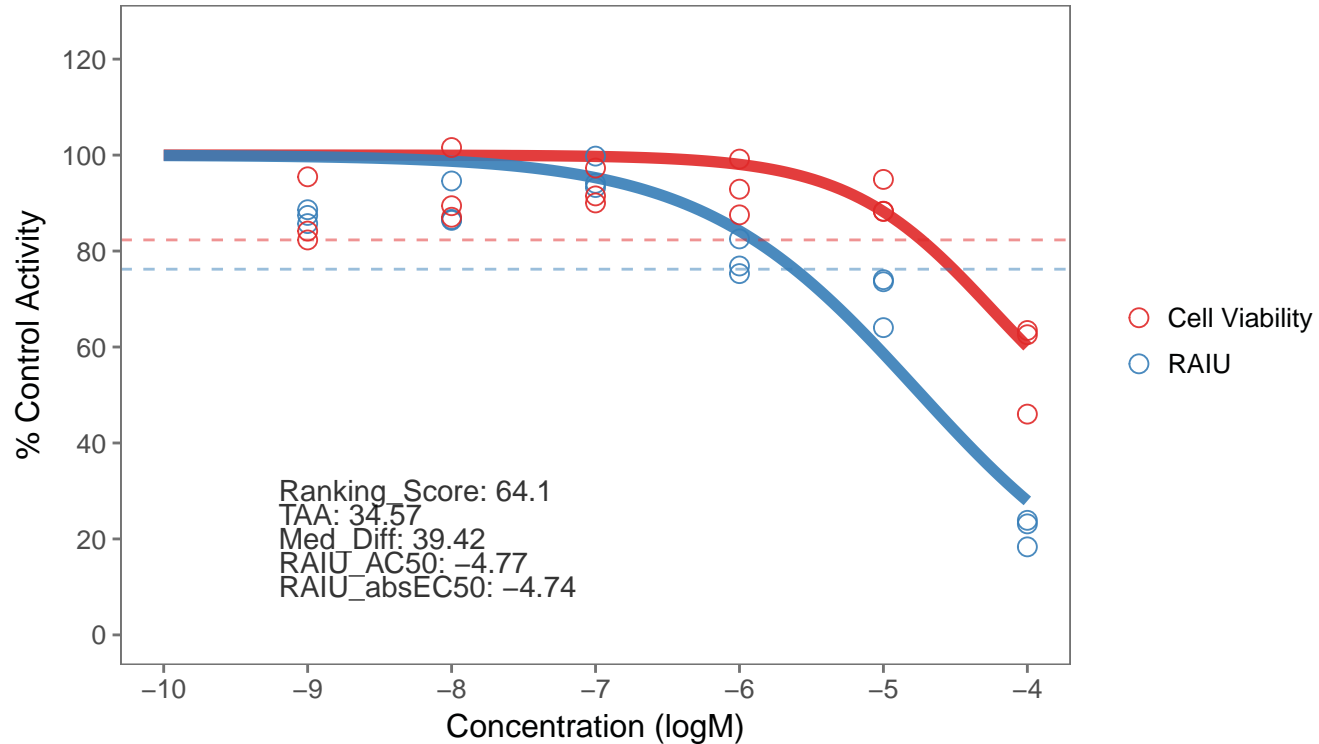

16. SPID: TP0001500D03  
NAME: Cyhalofop-butyl  
CAS NO: 122008-85-9

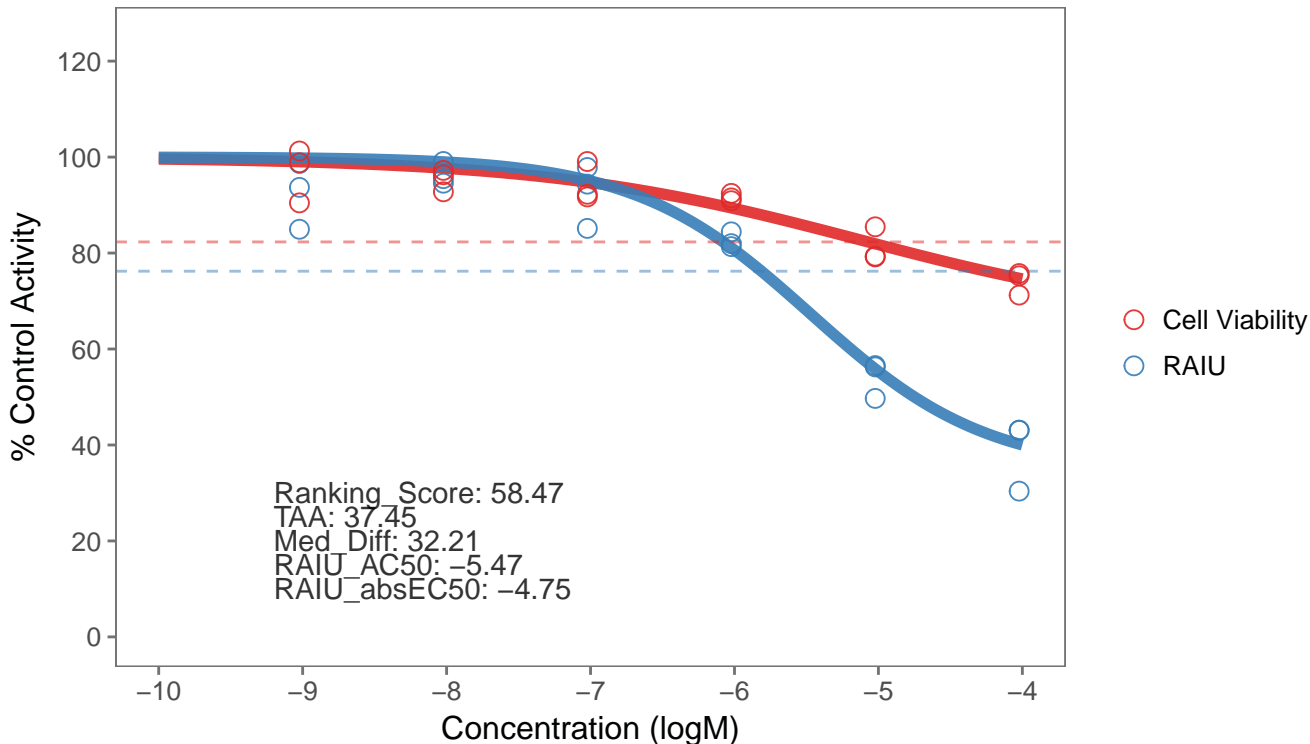

17. SPID: TP0001499A01  
NAME: Fenpyroximate (Z,E)  
CAS NO: 111812-58-9

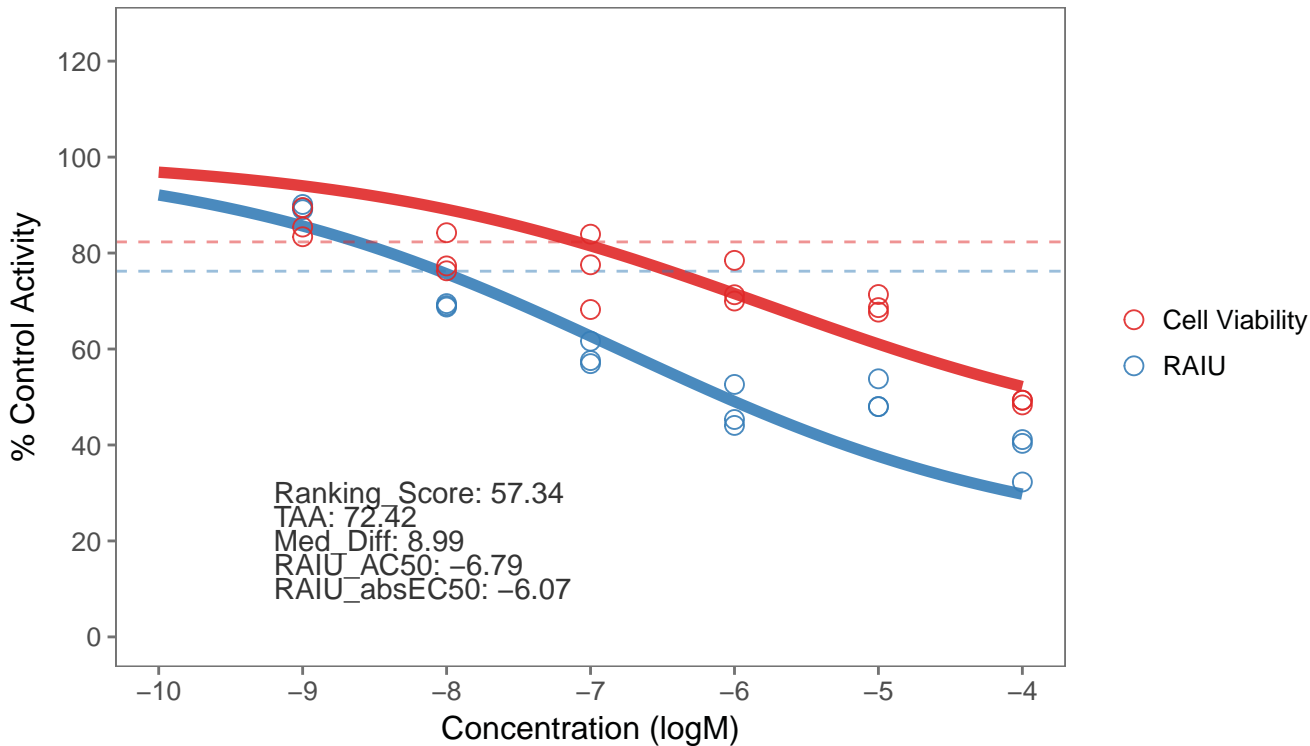

18. SPID: TP0001498C01  
NAME: Thiobencarb  
CAS NO: 28249-77-6

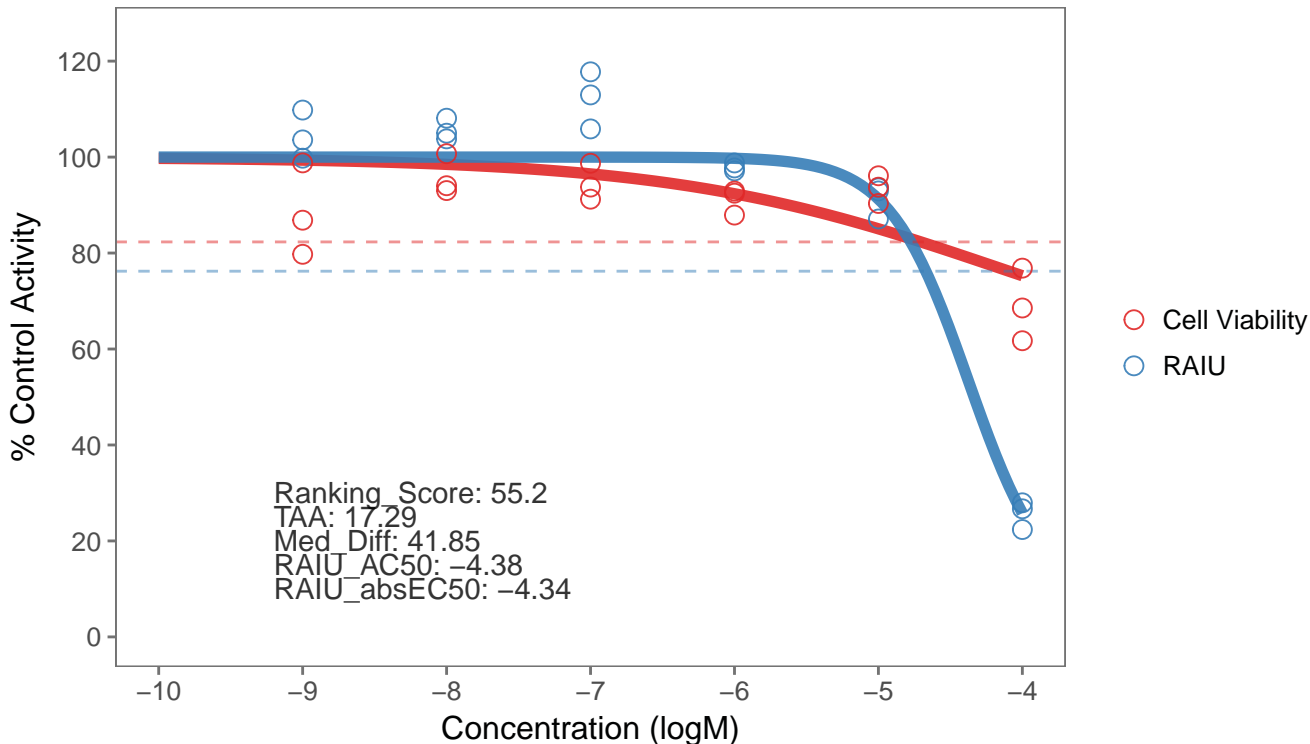

19. SPID: TP0001500E07  
NAME: Emamectin benzoate  
CAS NO: 155569-91-8

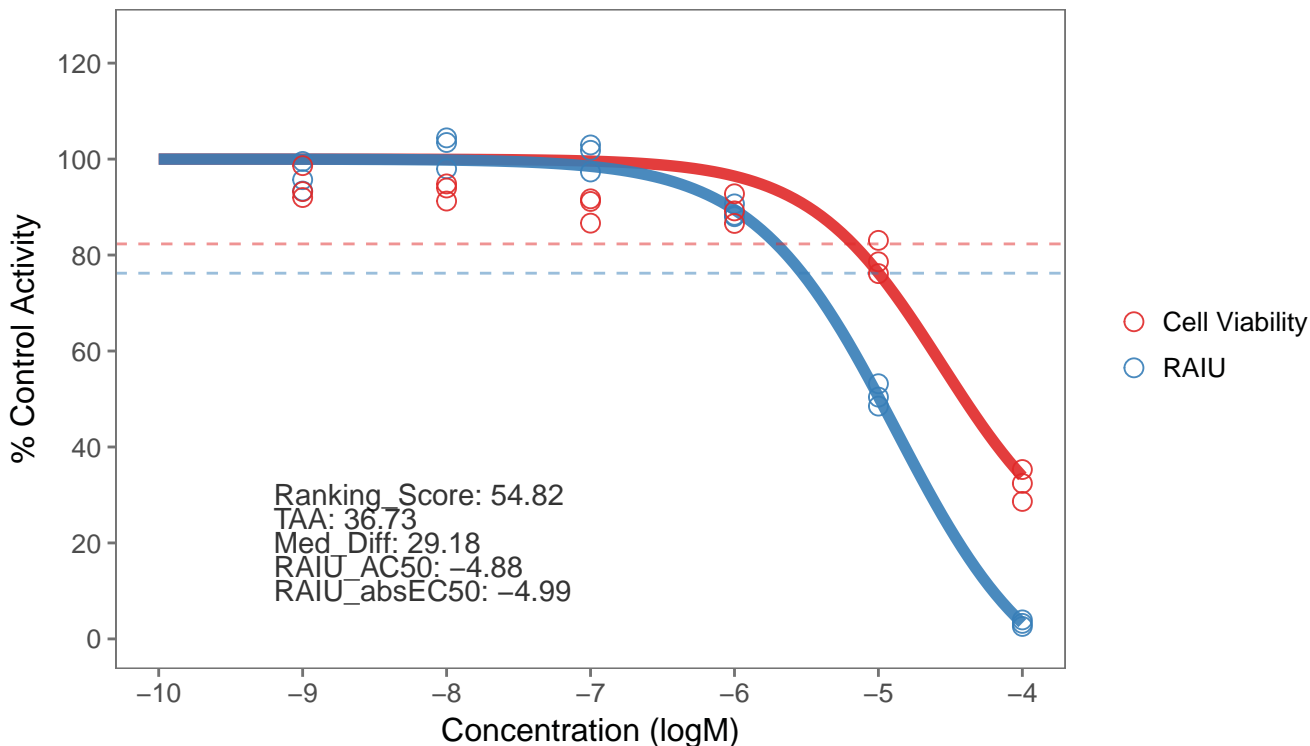



20. SPID: TP0001499C08

NAME: Diphenylamine

CAS NO: 122-39-4

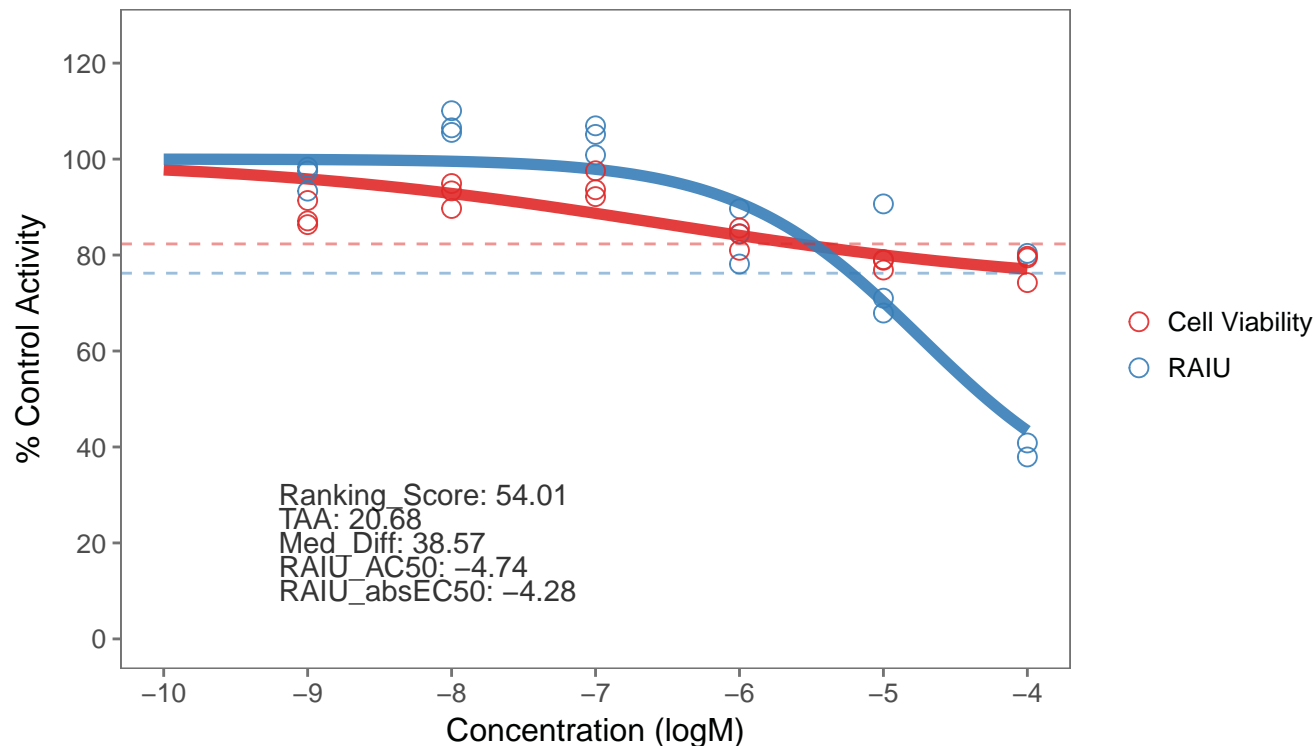

21. SPID: TP0001499G03

NAME: Folpet

CAS NO: 133-07-3

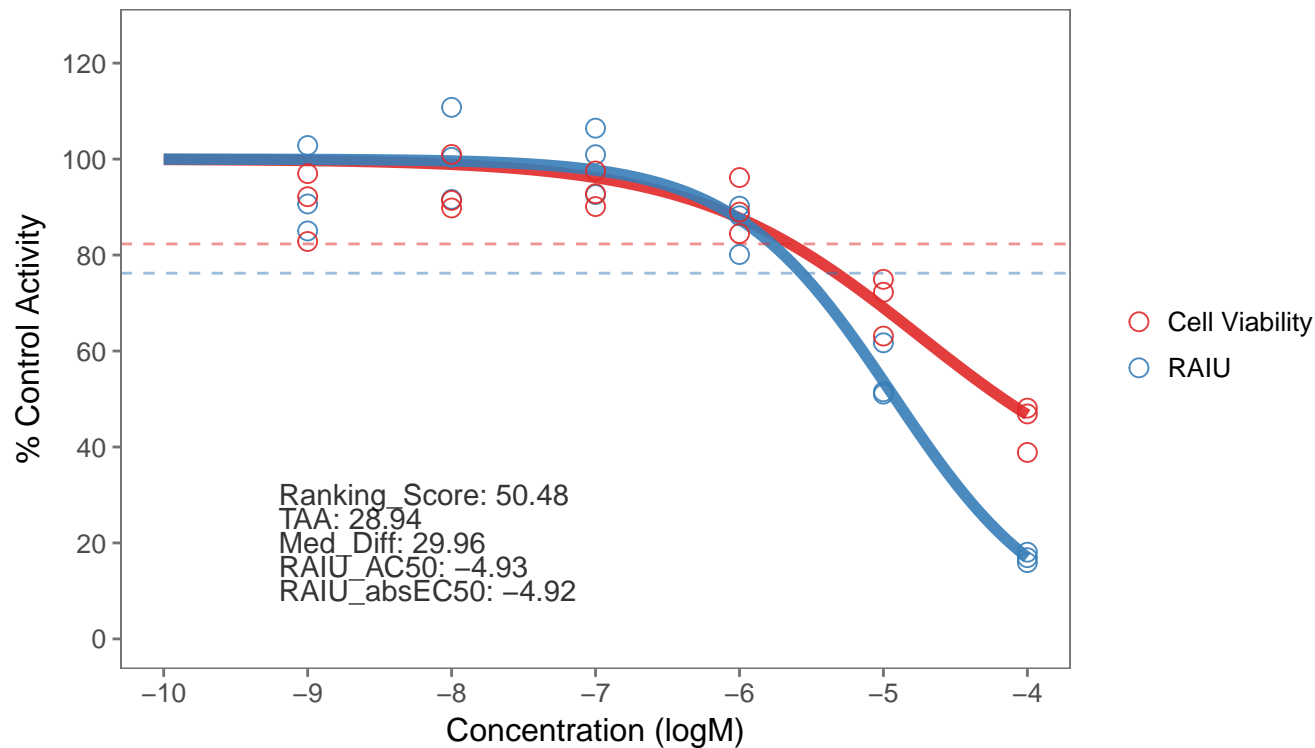

22. SPID: TP0001499B03

NAME: Endosulfan

CAS NO: 115-29-7

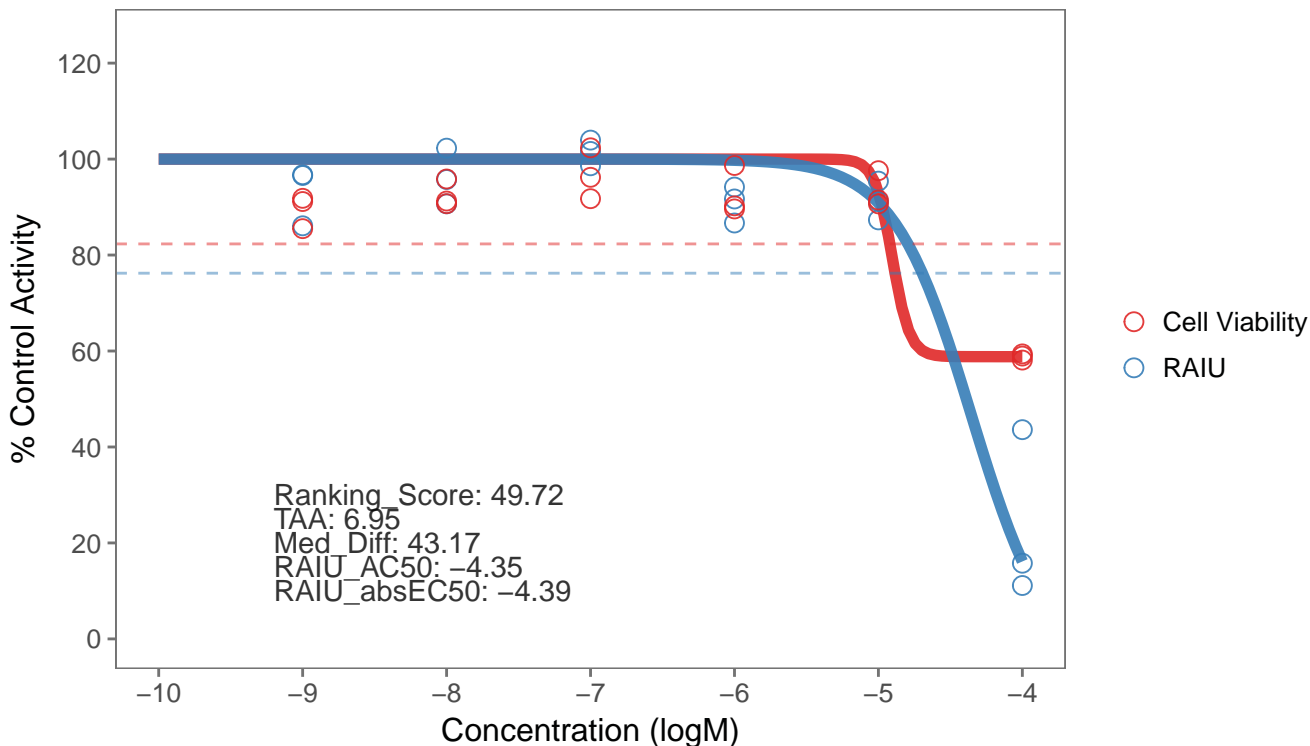

23. SPID: TP0001498C04

NAME: Prometryn

CAS NO: 7287-19-6

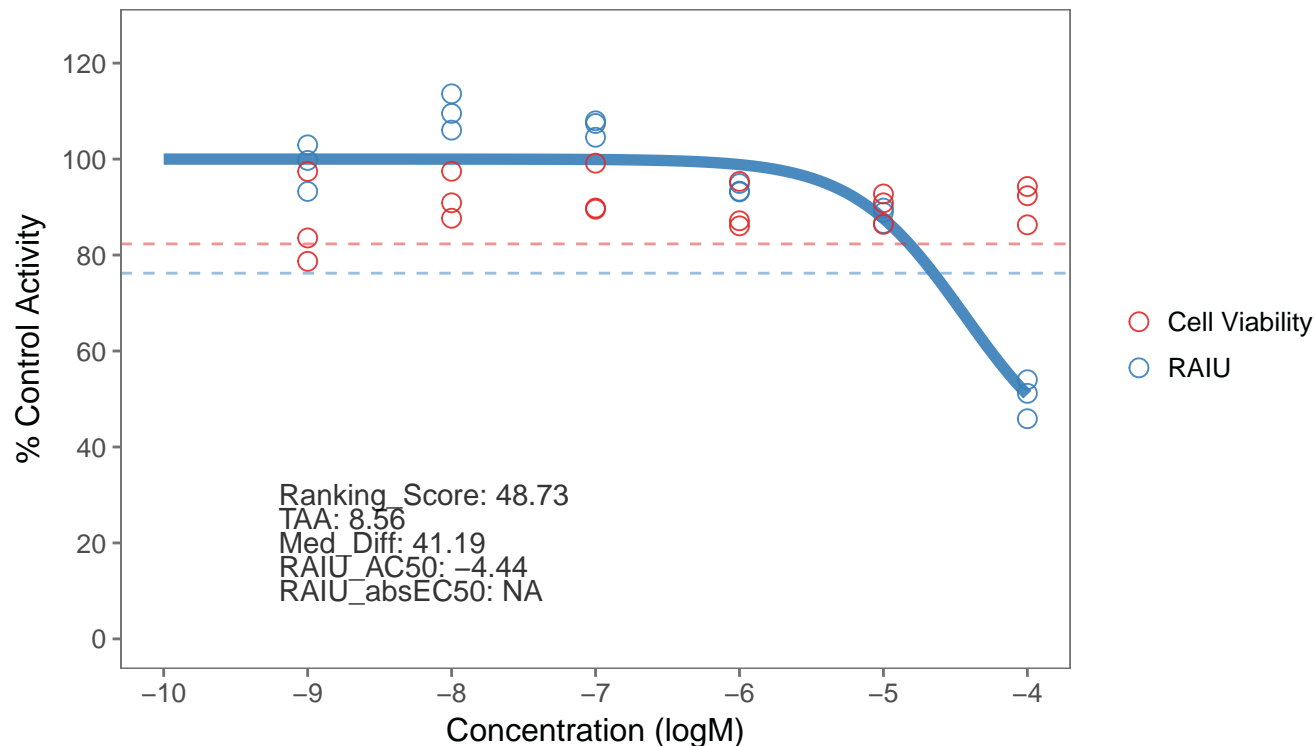

24. SPID: TP0001502F02  
NAME: Zoxamide  
CAS NO: 156052-68-5

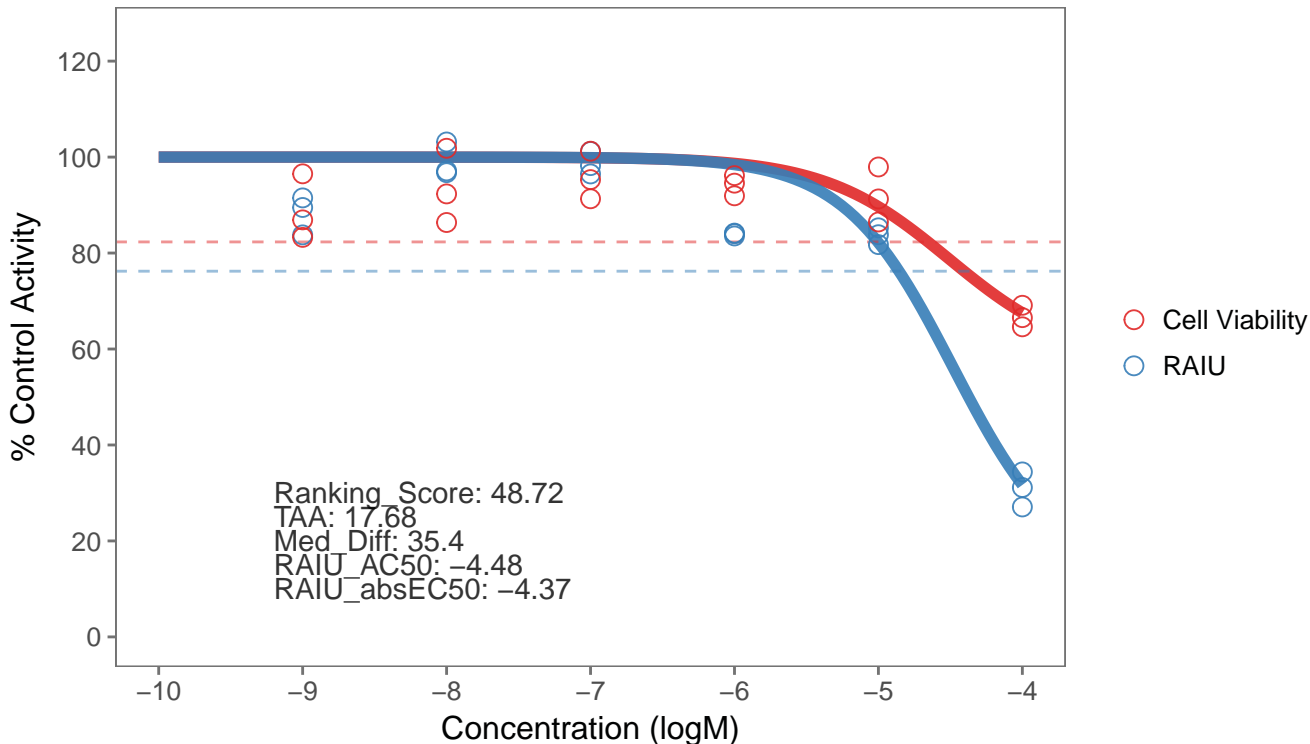

25. SPID: TP0001499E01  
NAME: Cyazofamid  
CAS NO: 120116-88-3

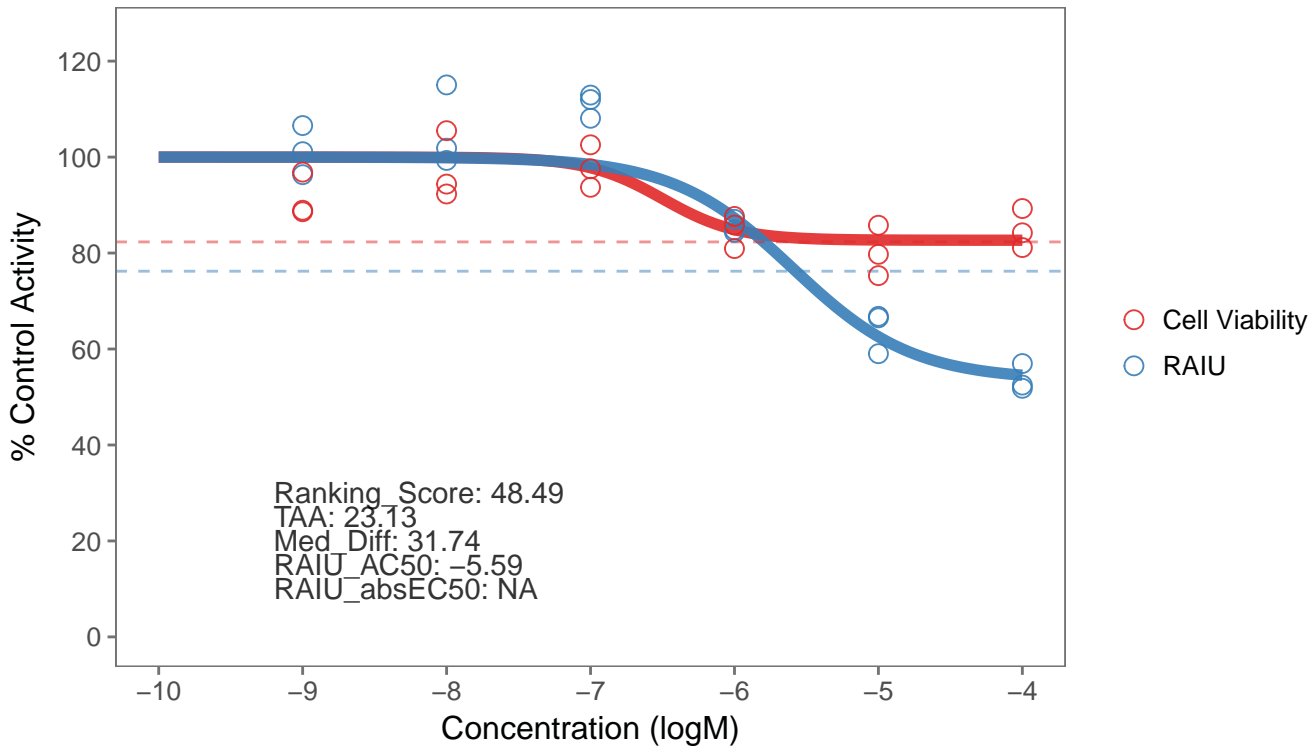

26. SPID: TP0001501E01  
NAME: Parathion  
CAS NO: 56-38-2

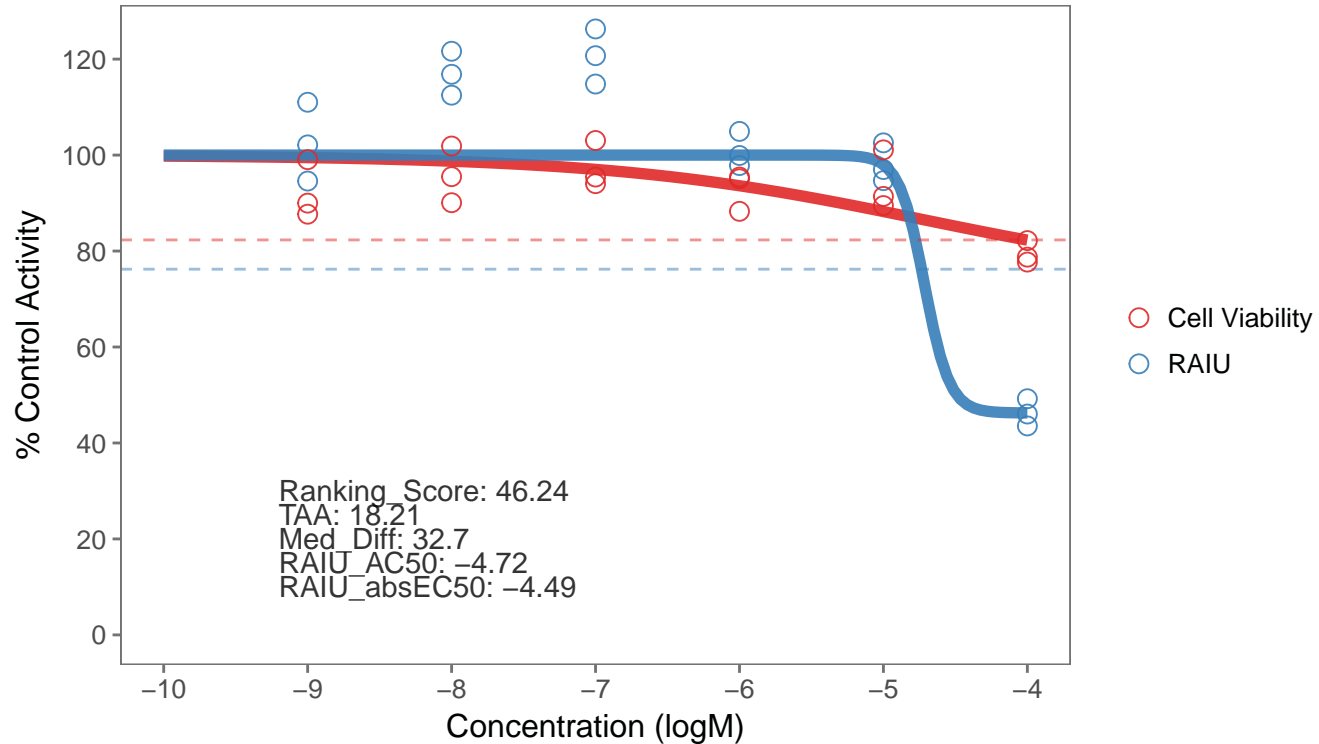

27. SPID: TP0001498F01  
NAME: Fenthion  
CAS NO: 55-38-9

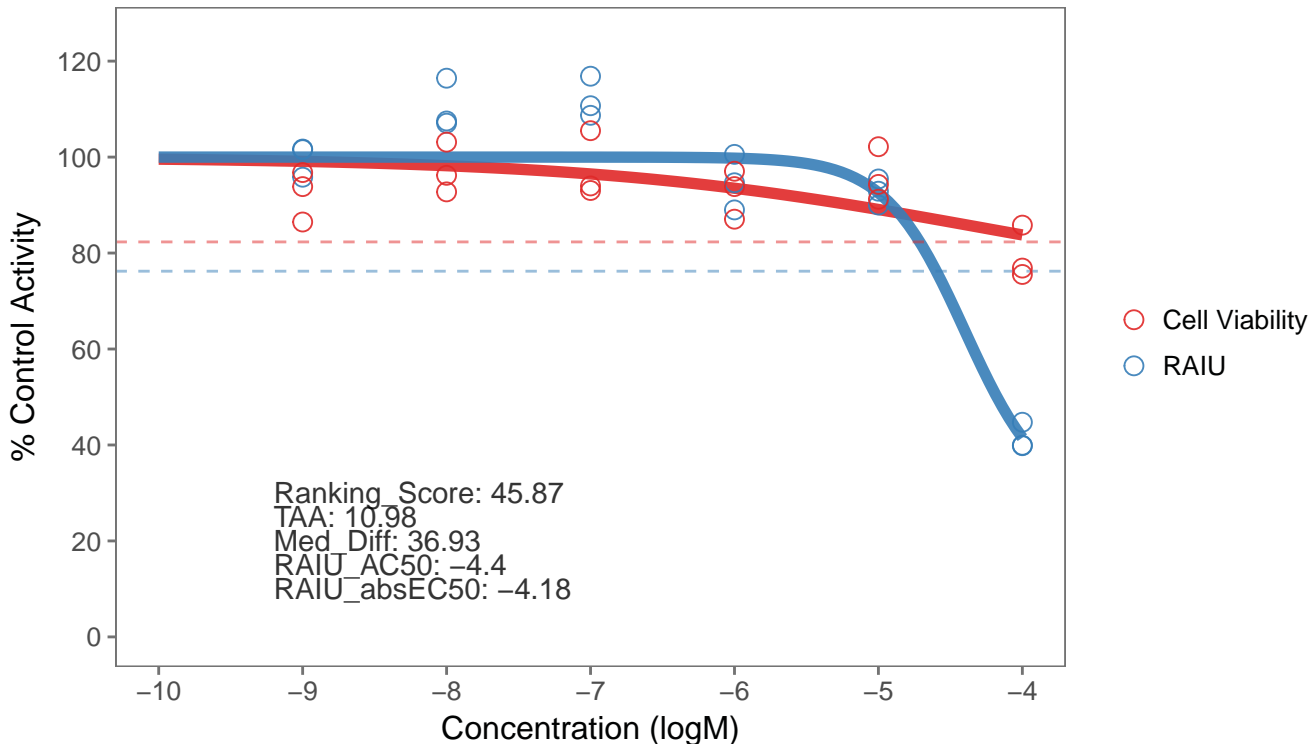



28. SPID: TP0001499G11

NAME: Mancozeb

CAS NO: 8018-01-7

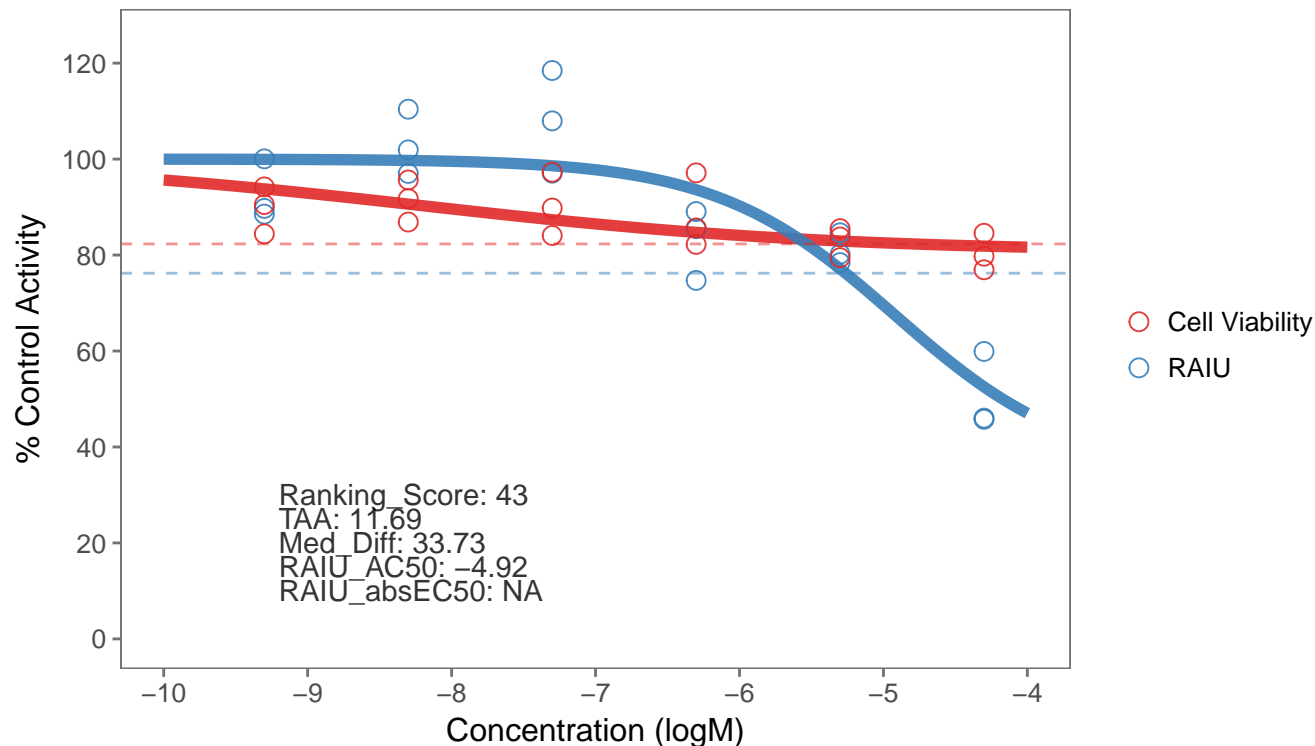

29. SPID: TP0001502F04

NAME: Bifenazate

CAS NO: 149877-41-8

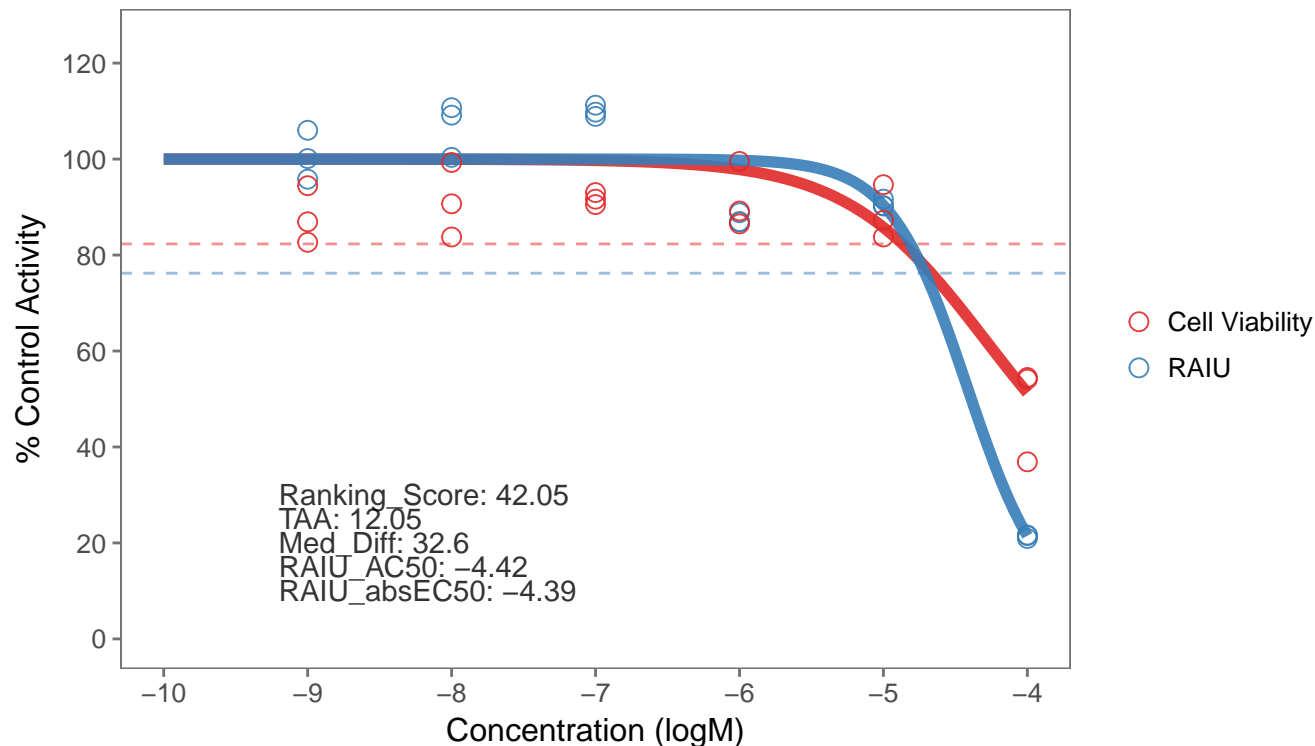

30. SPID: TP0001502F09

NAME: Clorophene

CAS NO: 120-32-1

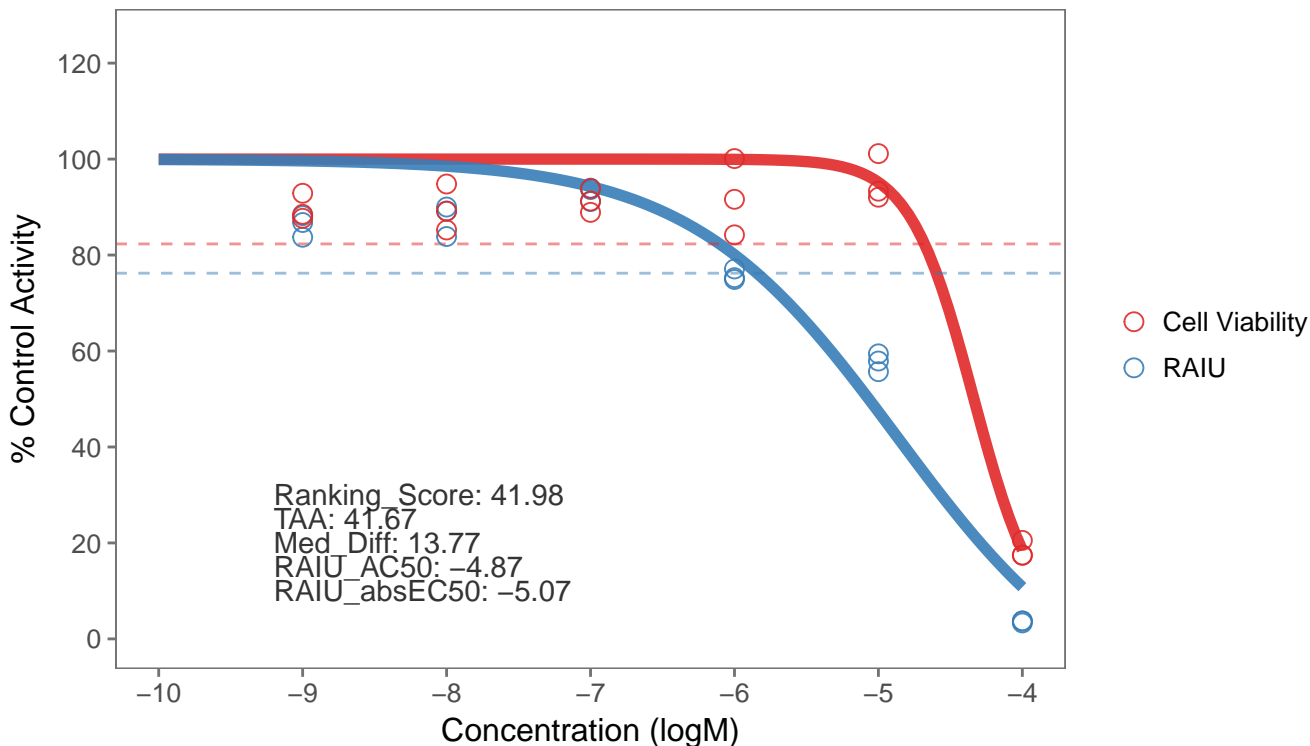

31. SPID: TP0001499F10  
NAME: Trifloxystrobin  
CAS NO: 141517-21-7

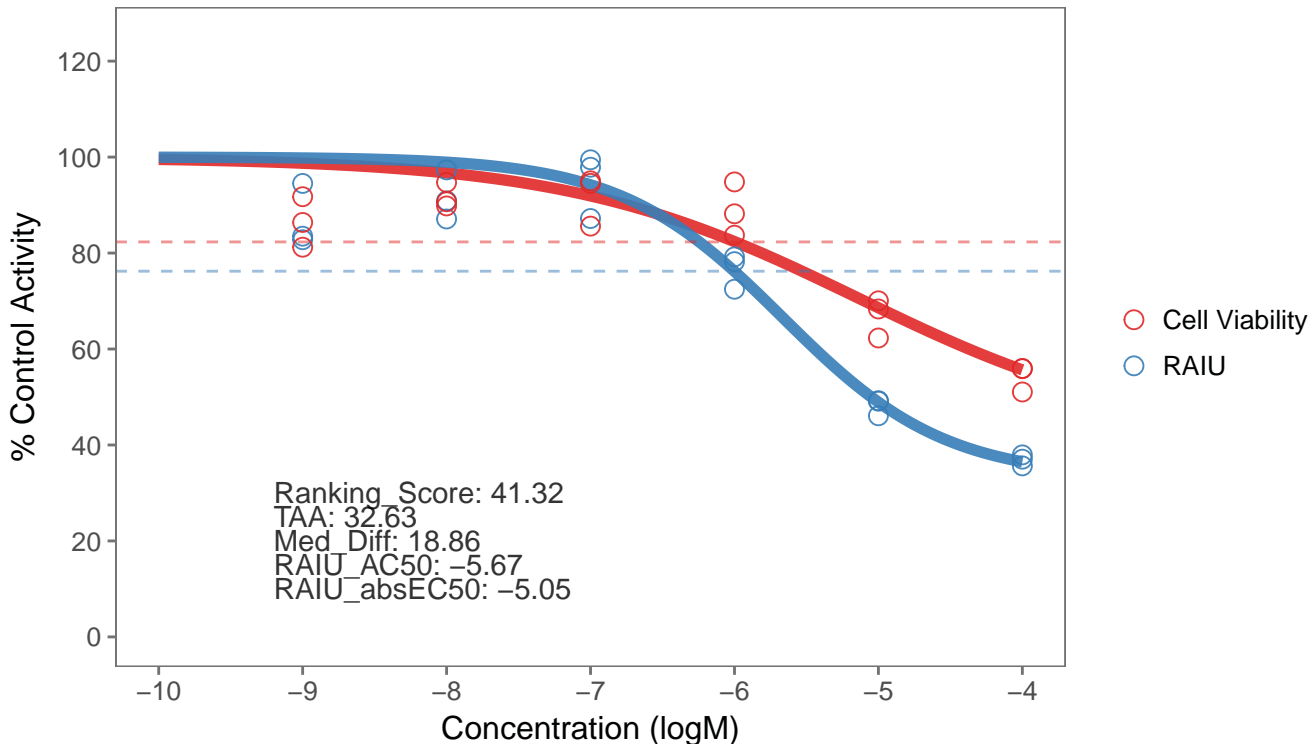

32. SPID: TP0001500D07  
NAME: Triclosan  
CAS NO: 3380-34-5

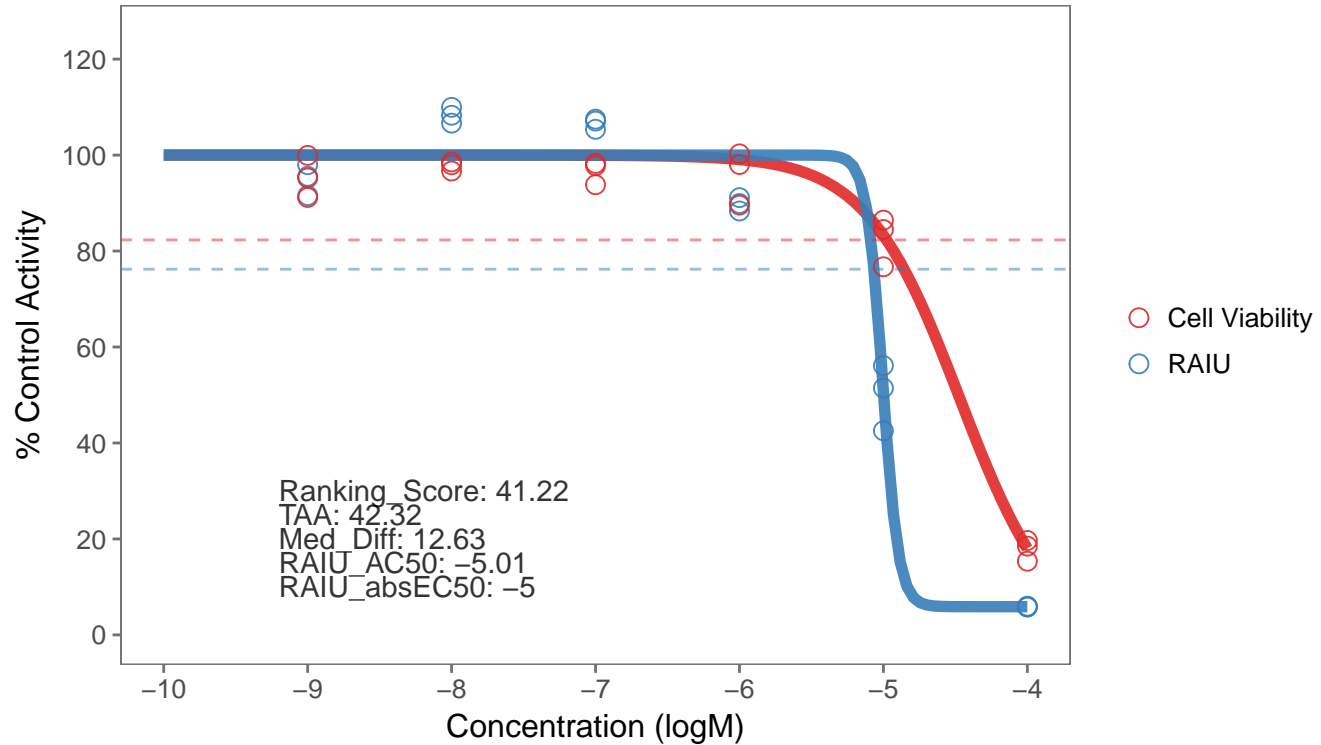

33. SPID: TP0001502B03  
NAME: Methoxychlor  
CAS NO: 72-43-5

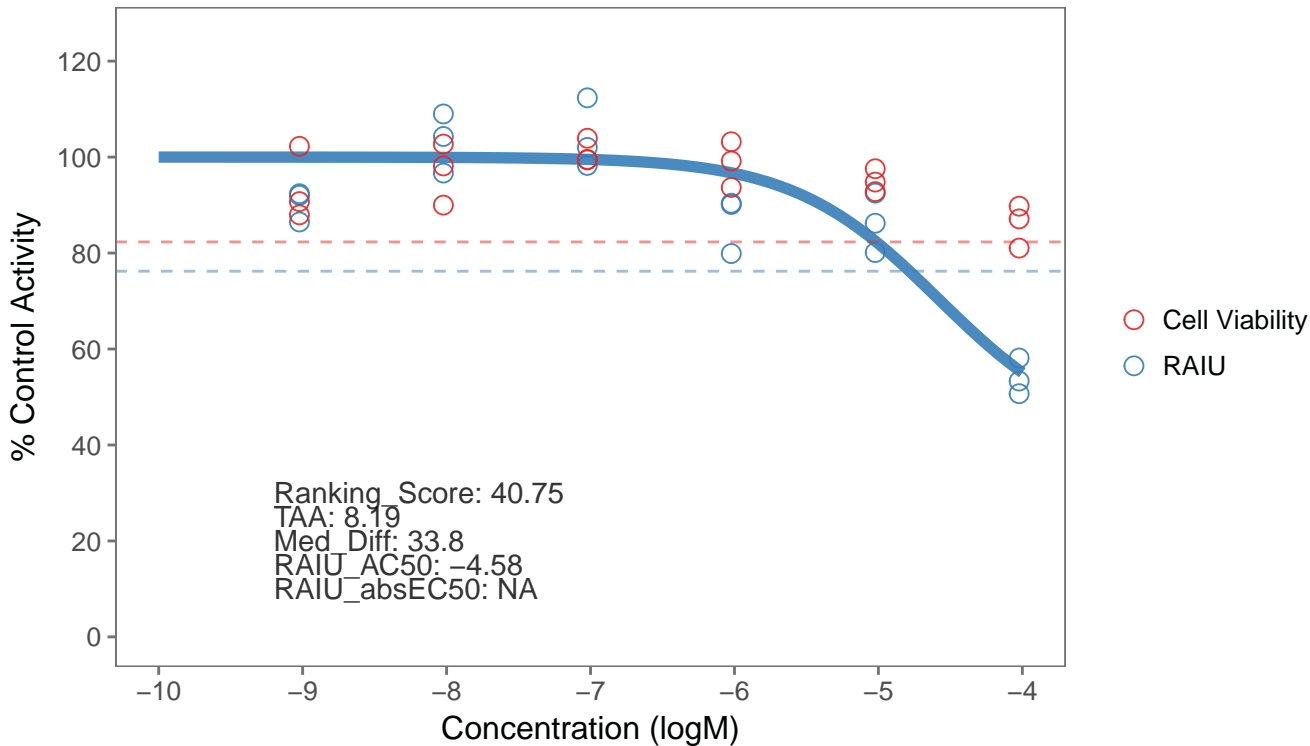

34. SPID: TP0001499F01  
NAME: Quinoxifen  
CAS NO: 124495-18-7

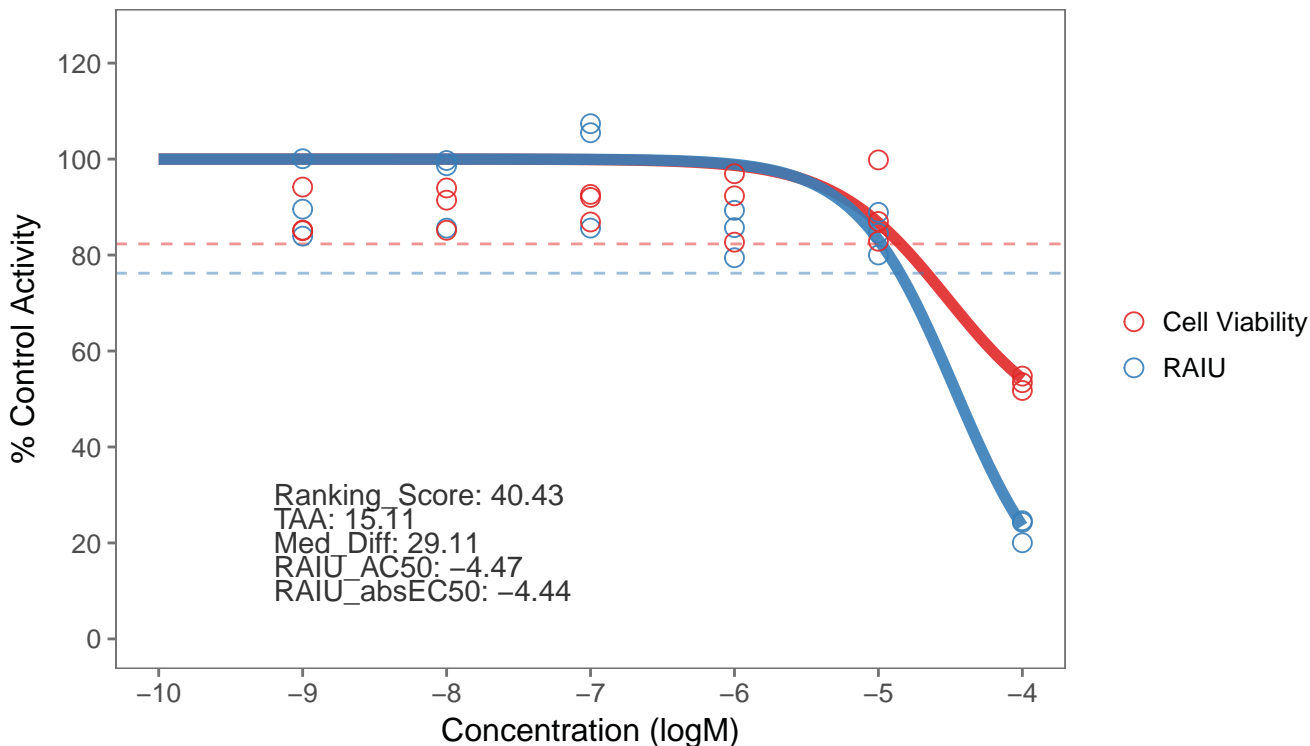

35. SPID: TP0001499G01

NAME: Triflumizole

CAS NO: 68694-11-1

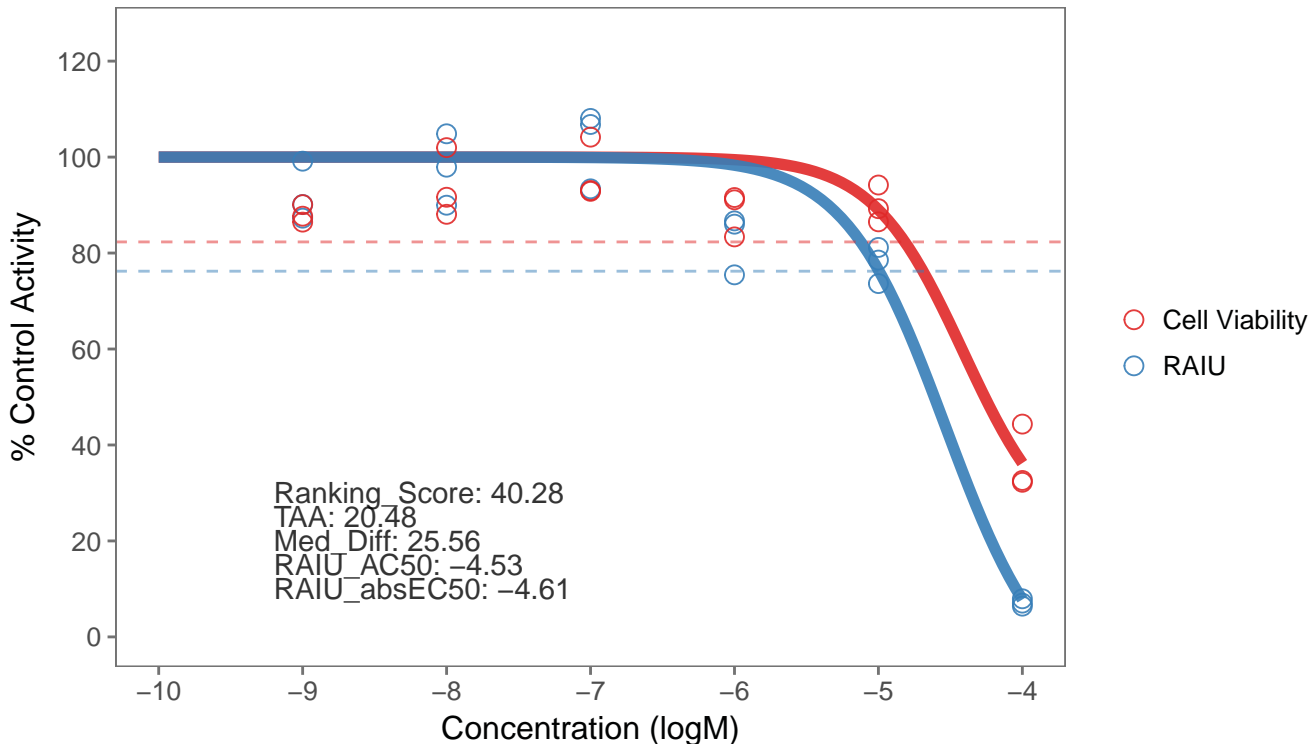



36. SPID: TP0001501E11

NAME: Prallethrin

CAS NO: 23031-36-9

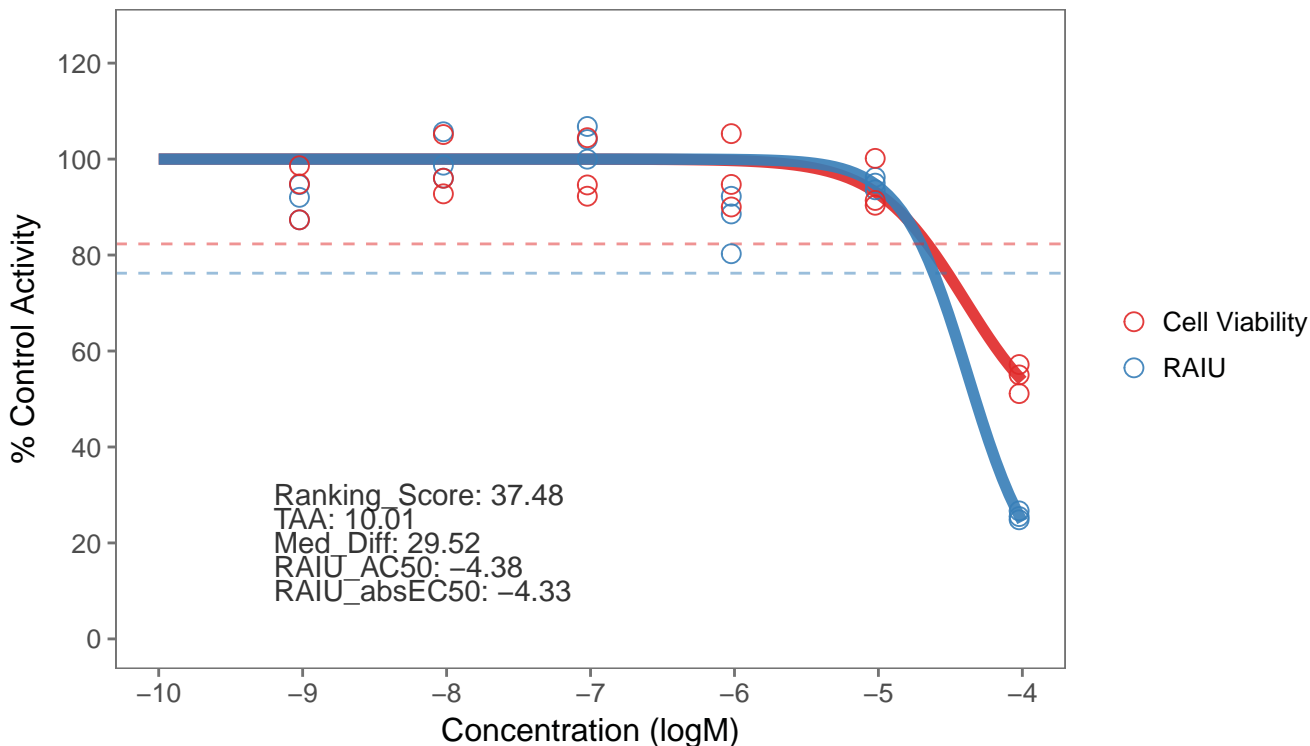

37. SPID: TP0001499C01  
NAME: S-Bioallethrin  
CAS NO: 28434-00-6

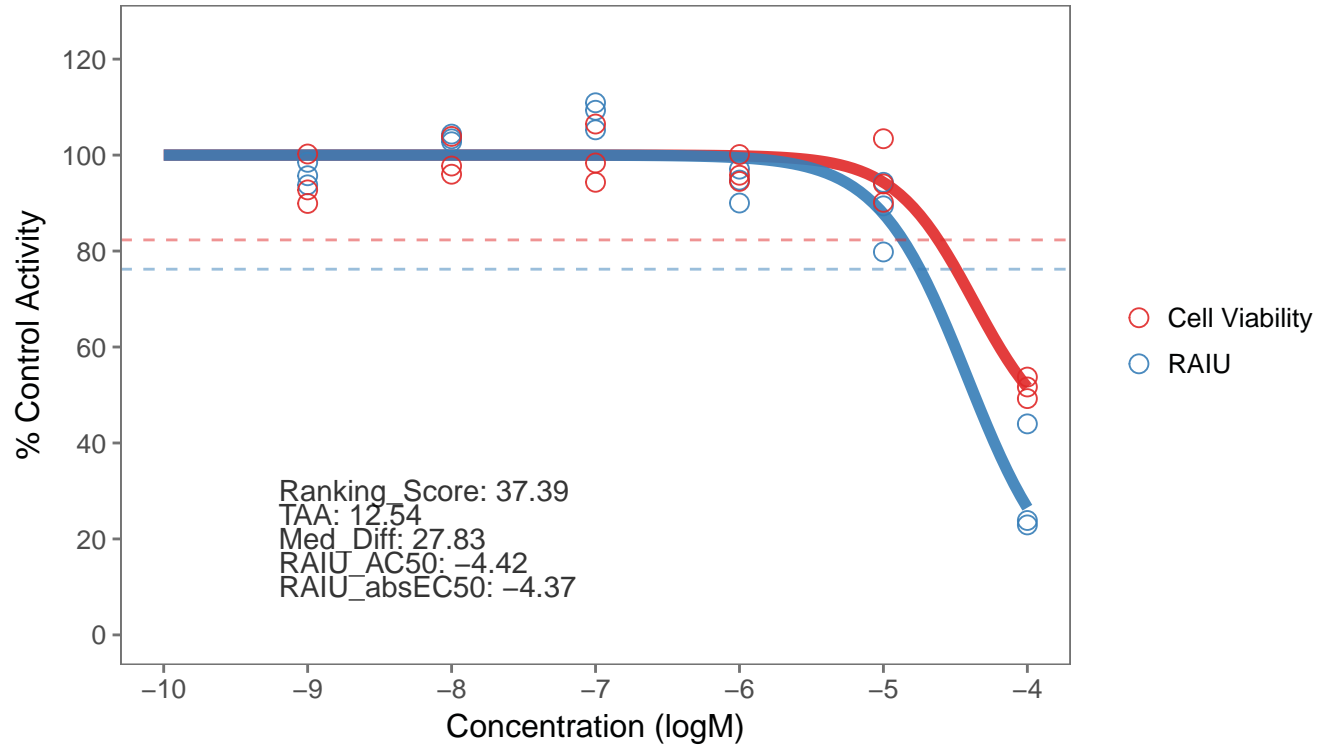

38. SPID: TP0001502B10  
NAME: Coumaphos  
CAS NO: 56-72-4

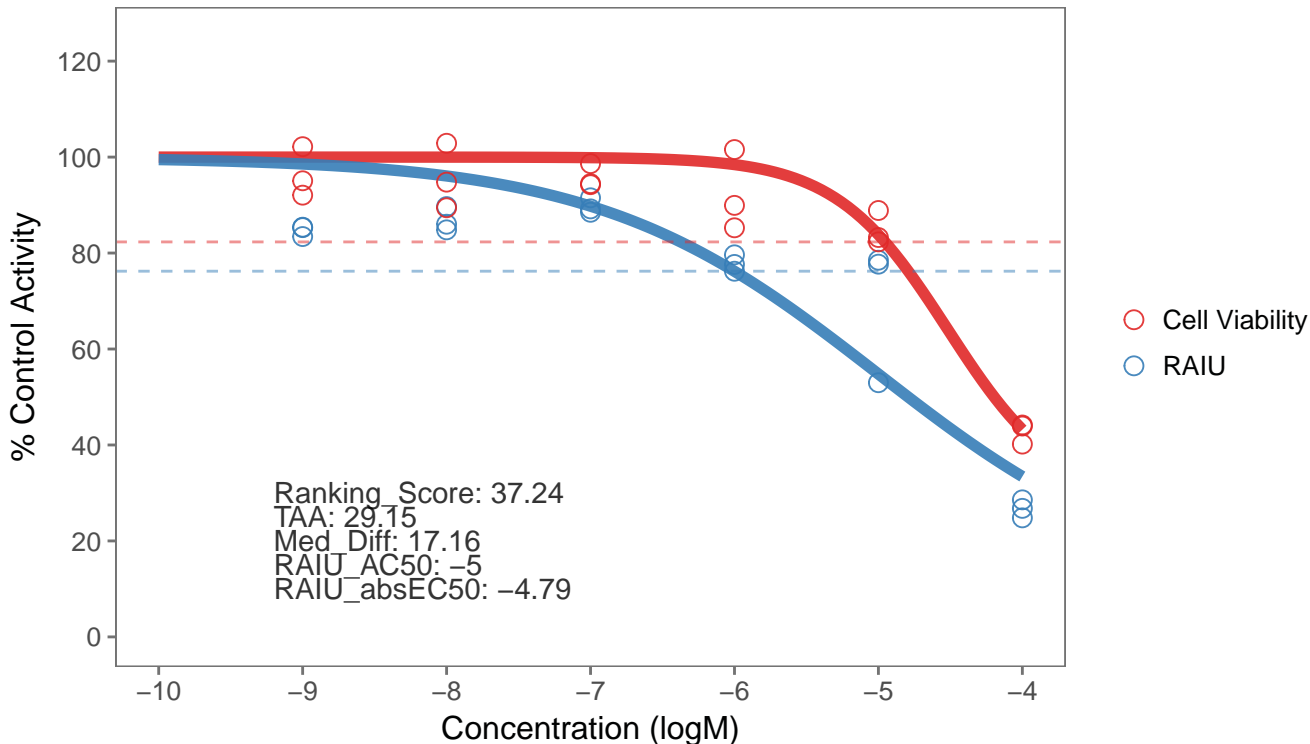

39. SPID: TP0001502F07  
NAME: Chlorpyrifos-methyl  
CAS NO: 5598-13-0

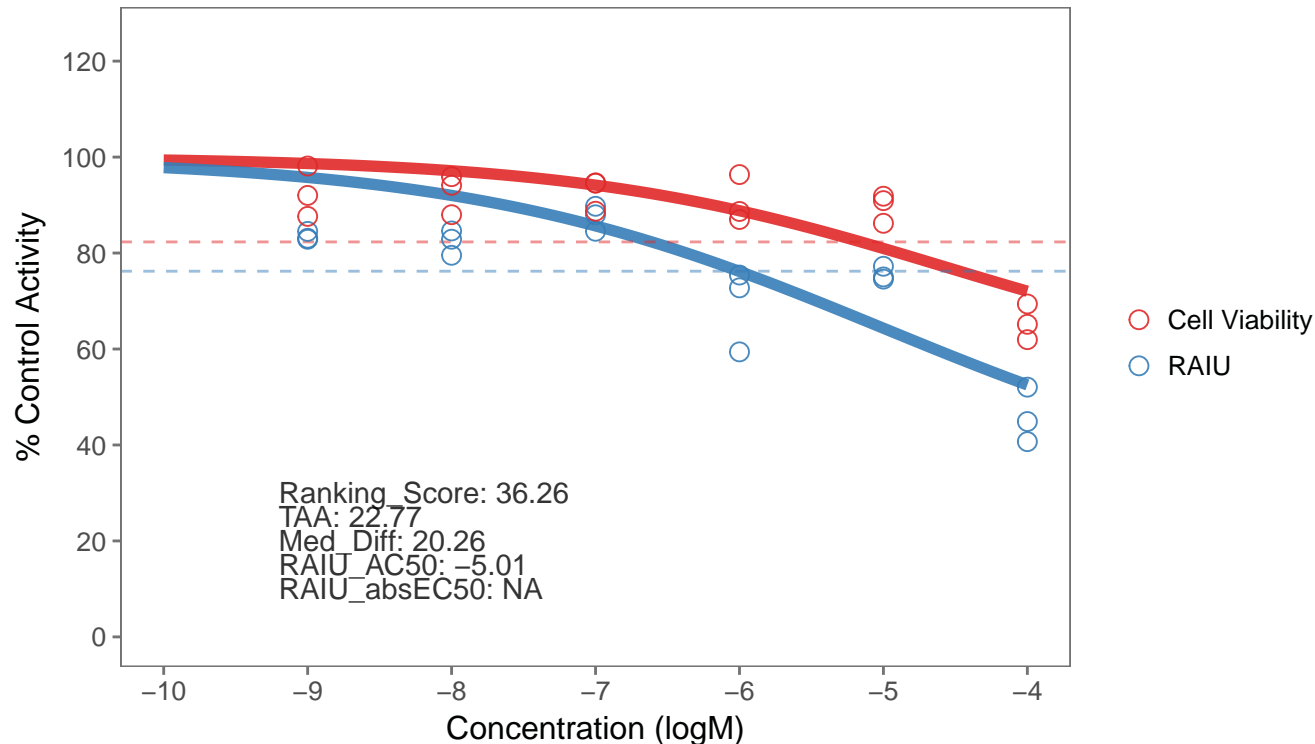

40. SPID: TP0001498D10  
NAME: Fluoxastrobin  
CAS NO: 361377-29-9

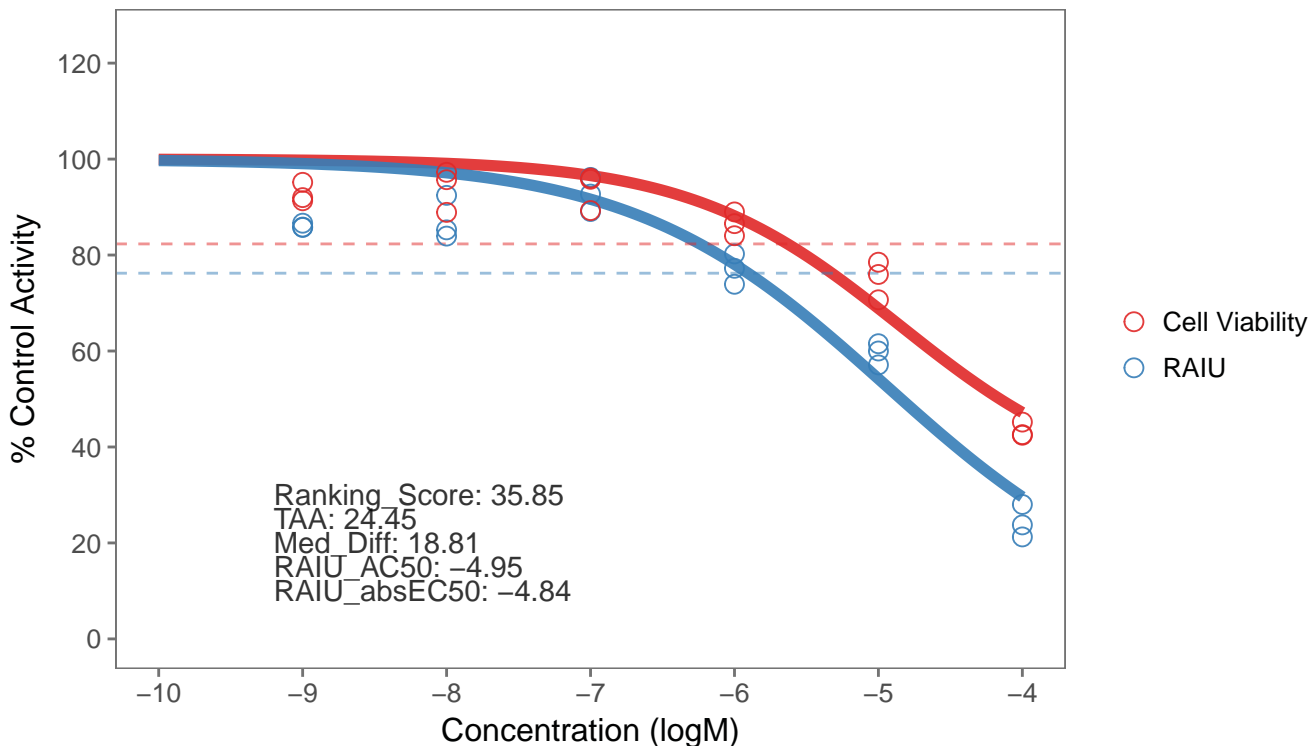

41. SPID: TP0001501C11

NAME: Triclosan

CAS NO: 3380-34-5

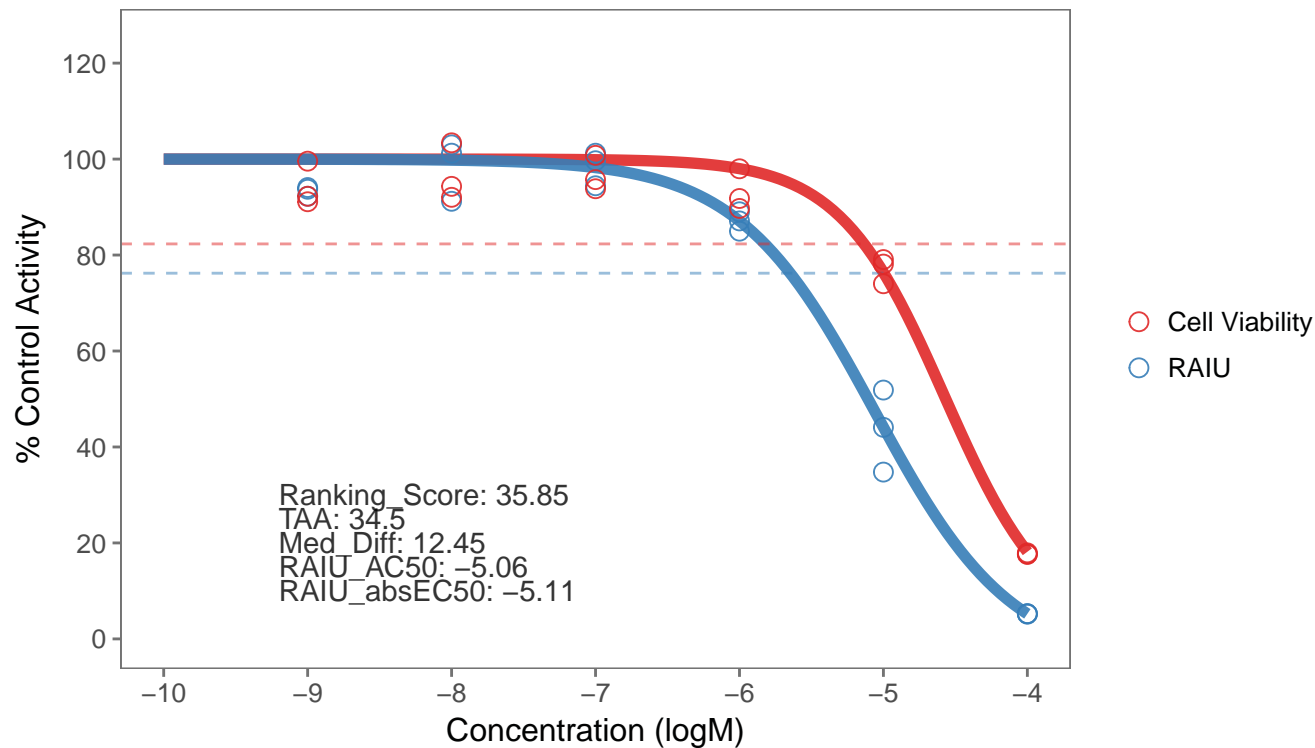

42. SPID: TP0001498H12

NAME: Pyraclostrobin

CAS NO: 175013-18-0

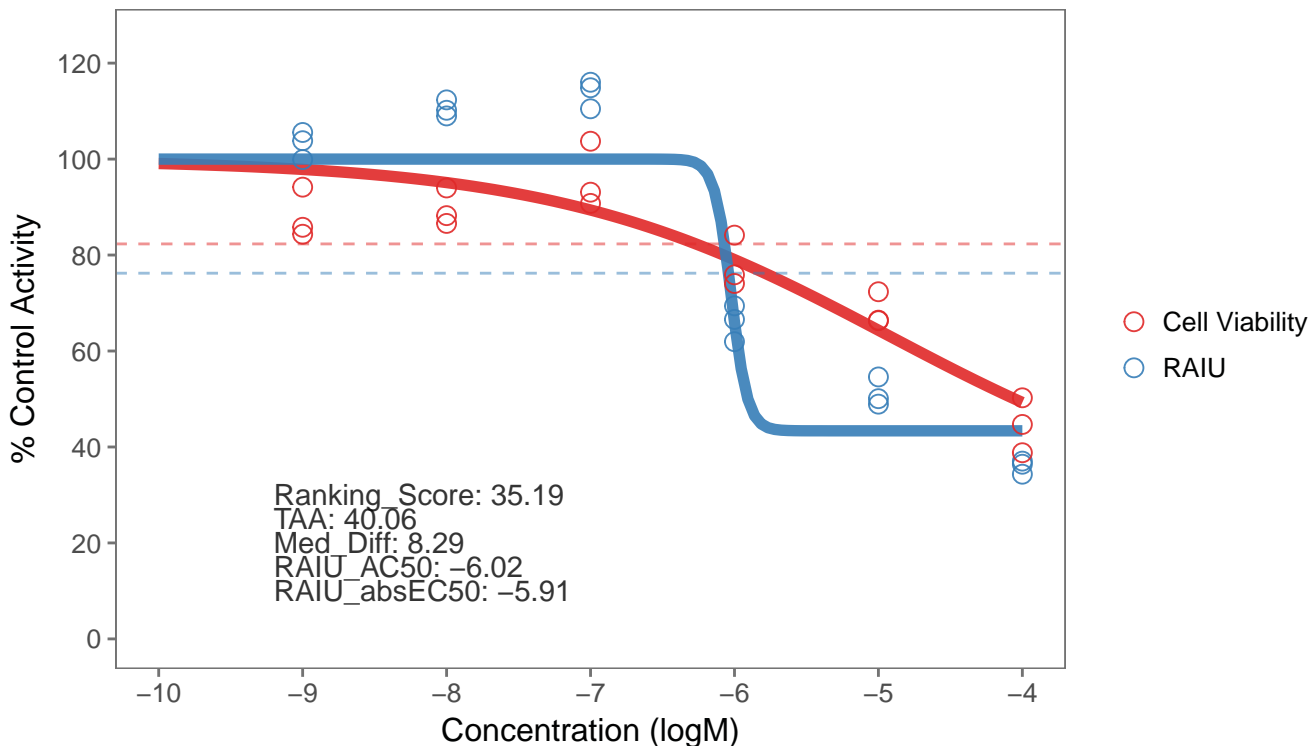

43. SPID: TP0001502G11  
NAME: Fenoxaprop-ethyl  
CAS NO: 66441-23-4

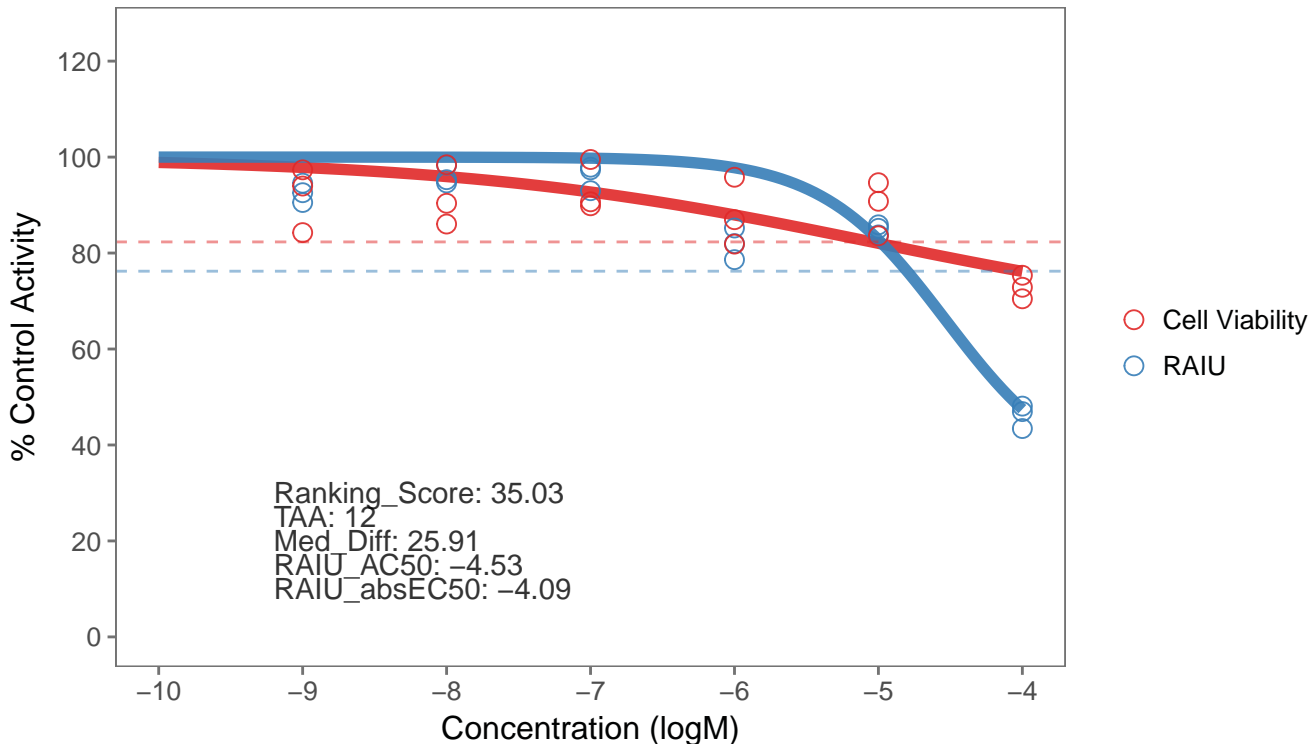



44. SPID: TP0001501D10  
NAME: Fenoxycarb  
CAS NO: 72490-01-8

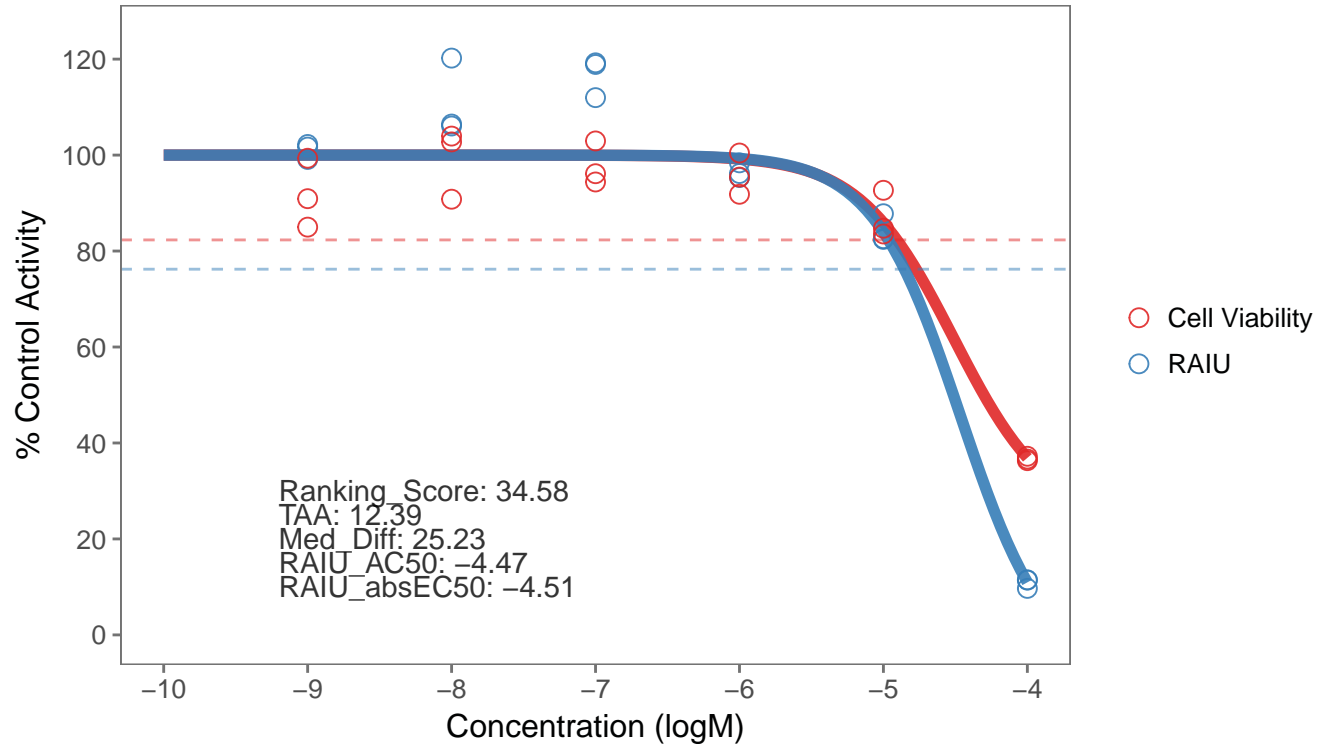

45. SPID: TP0001500G01  
NAME: Hexaconazole  
CAS NO: 79983-71-4

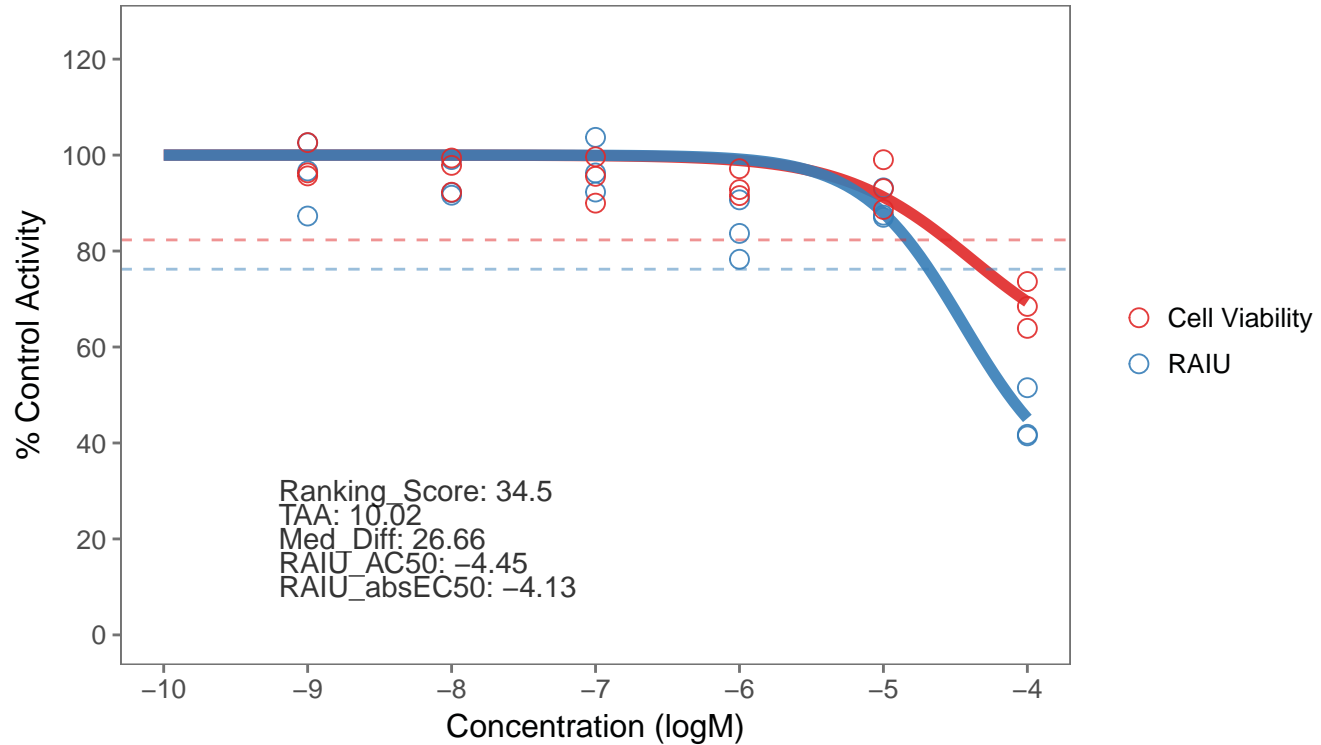

46. SPID: TP0001499E10  
NAME: Diclosulam  
CAS NO: 145701-21-9

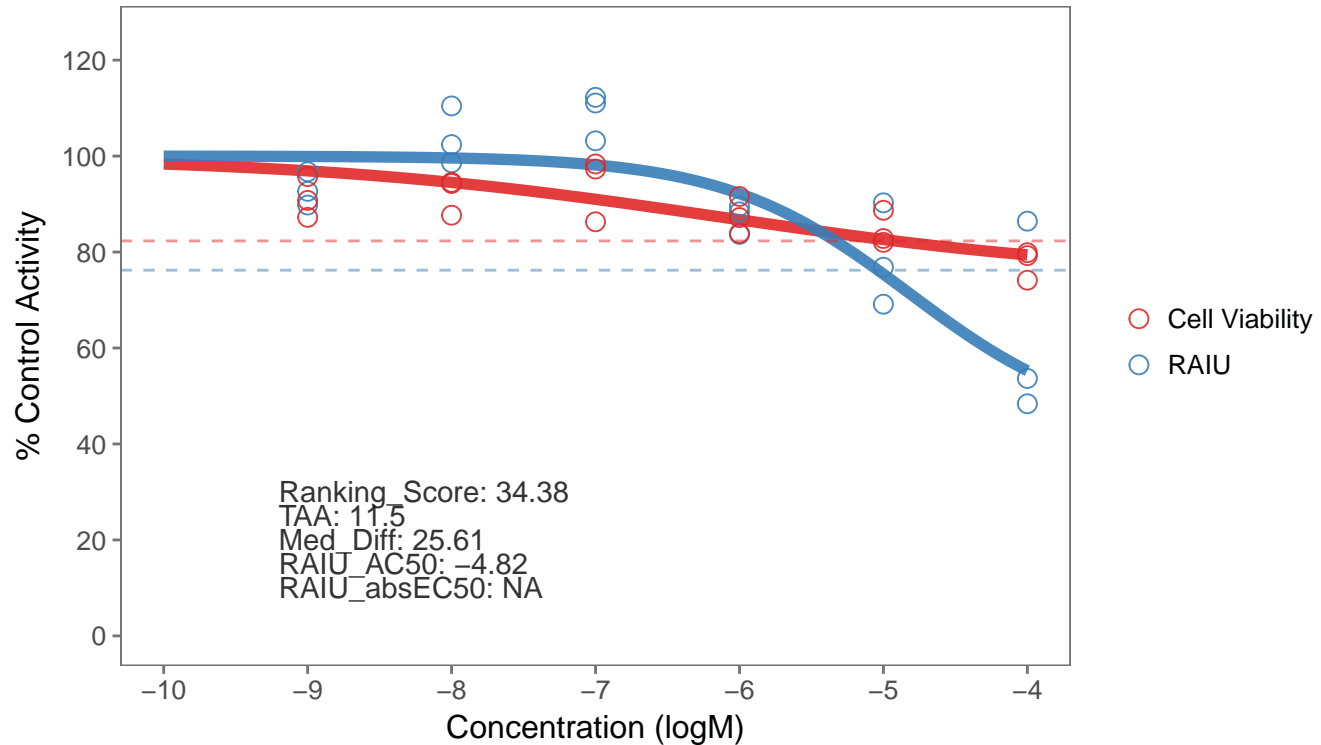

47. SPID: TP0001499D01  
NAME: Clorophene  
CAS NO: 120-32-1

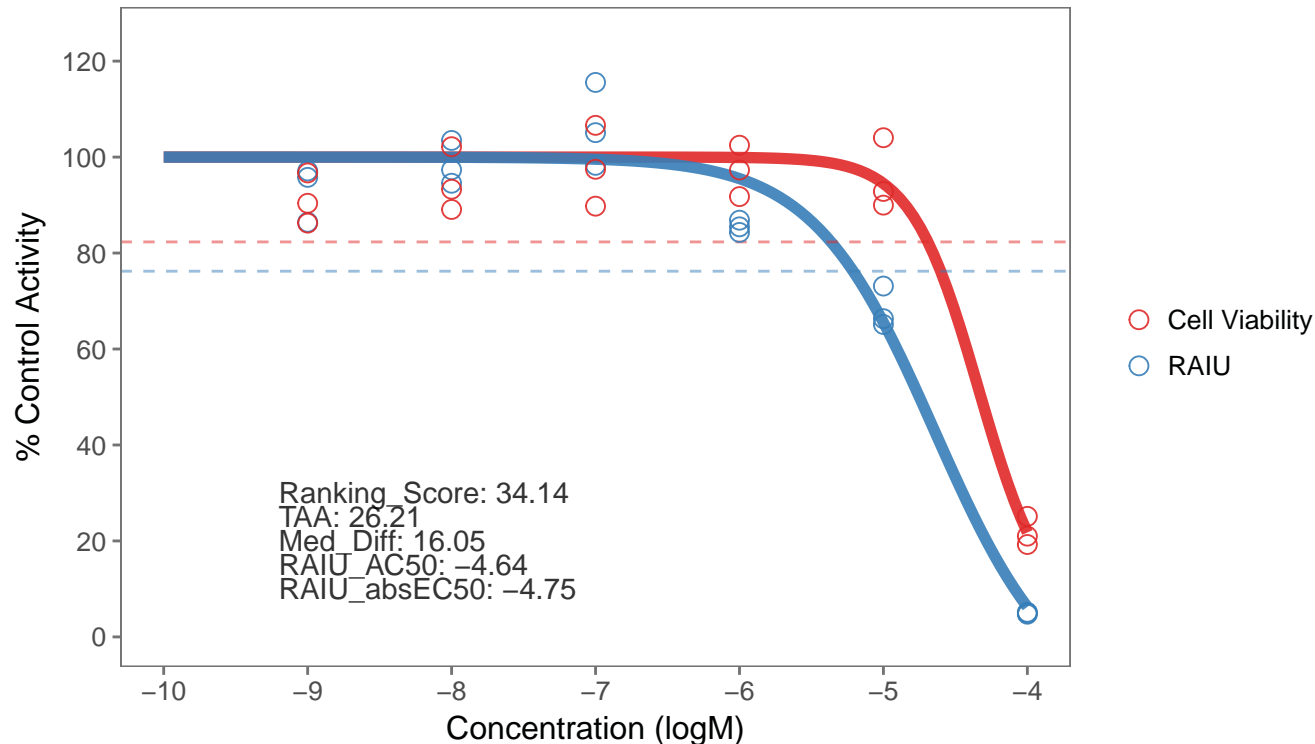

48. SPID: TP0001498D08  
NAME: Tebupirimfos  
CAS NO: 96182-53-5

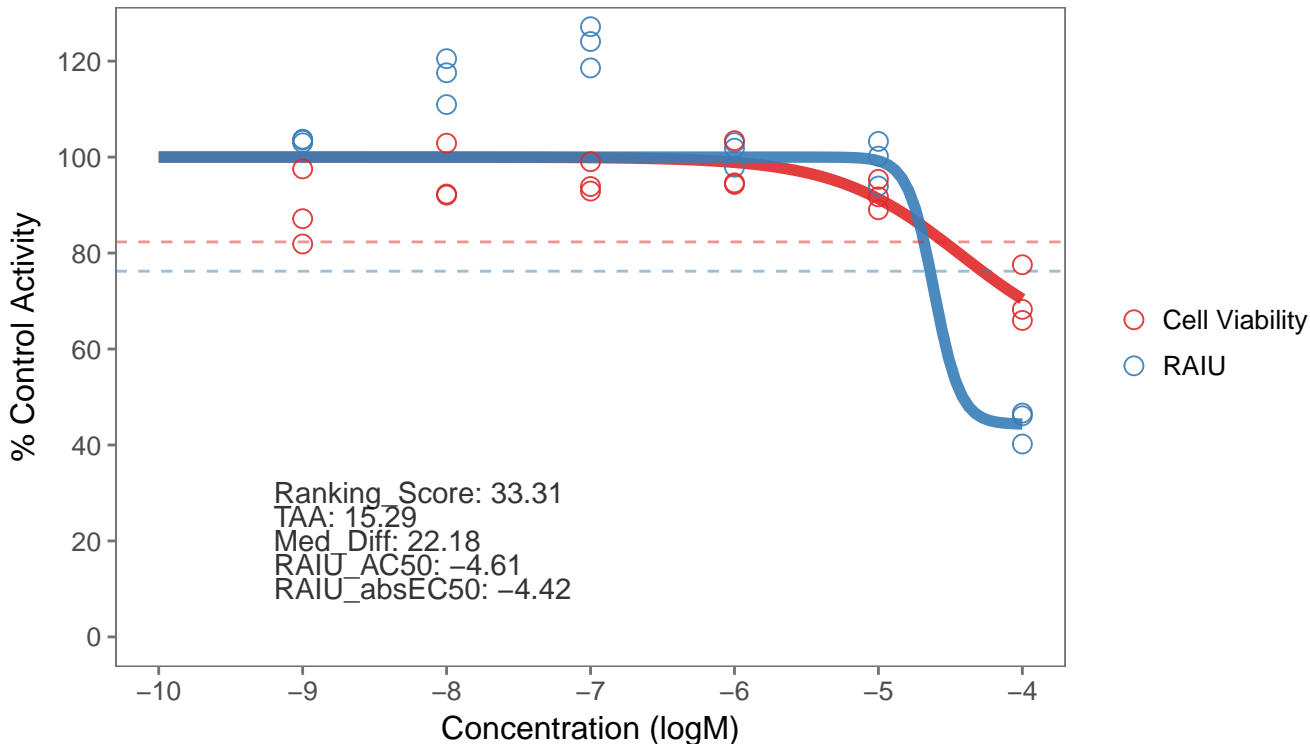

49. SPID: TP0001501C02

NAME: Abamectin

CAS NO: 71751-41-2

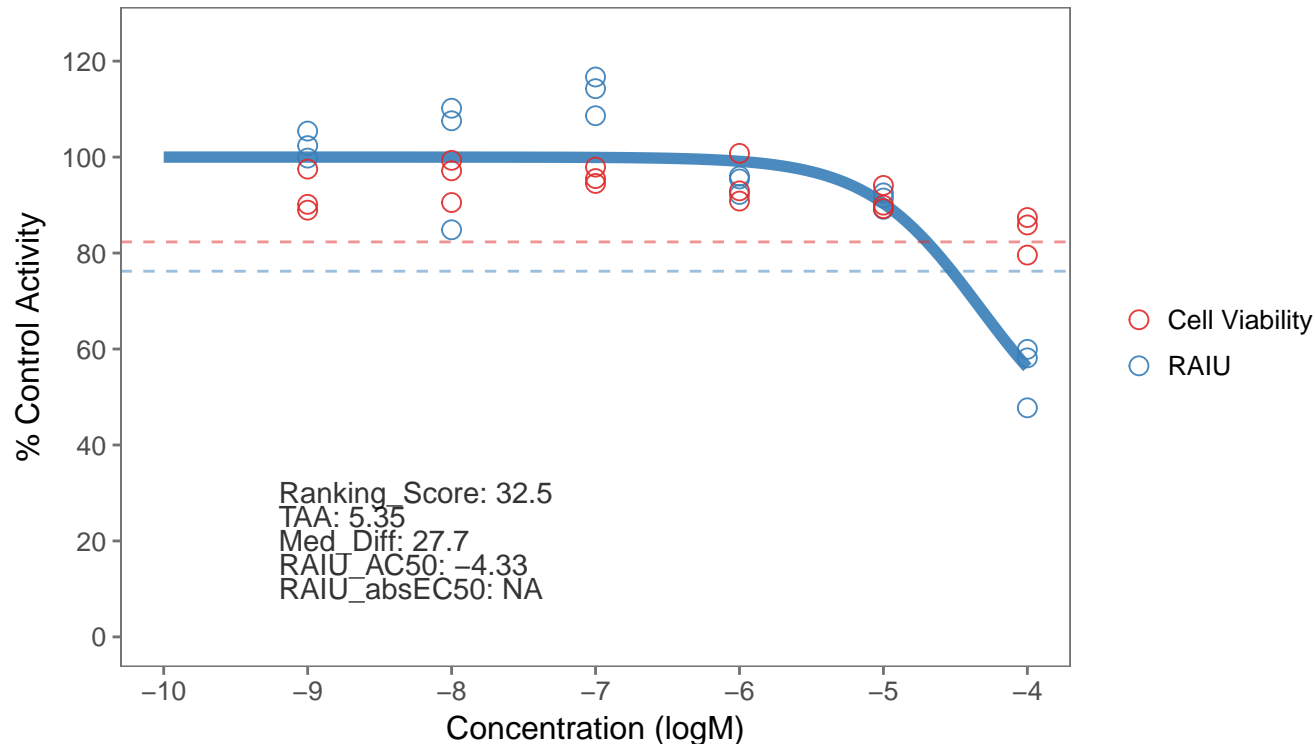

50. SPID: TP0001500E08

NAME: Pyriproxyfen

CAS NO: 95737-68-1

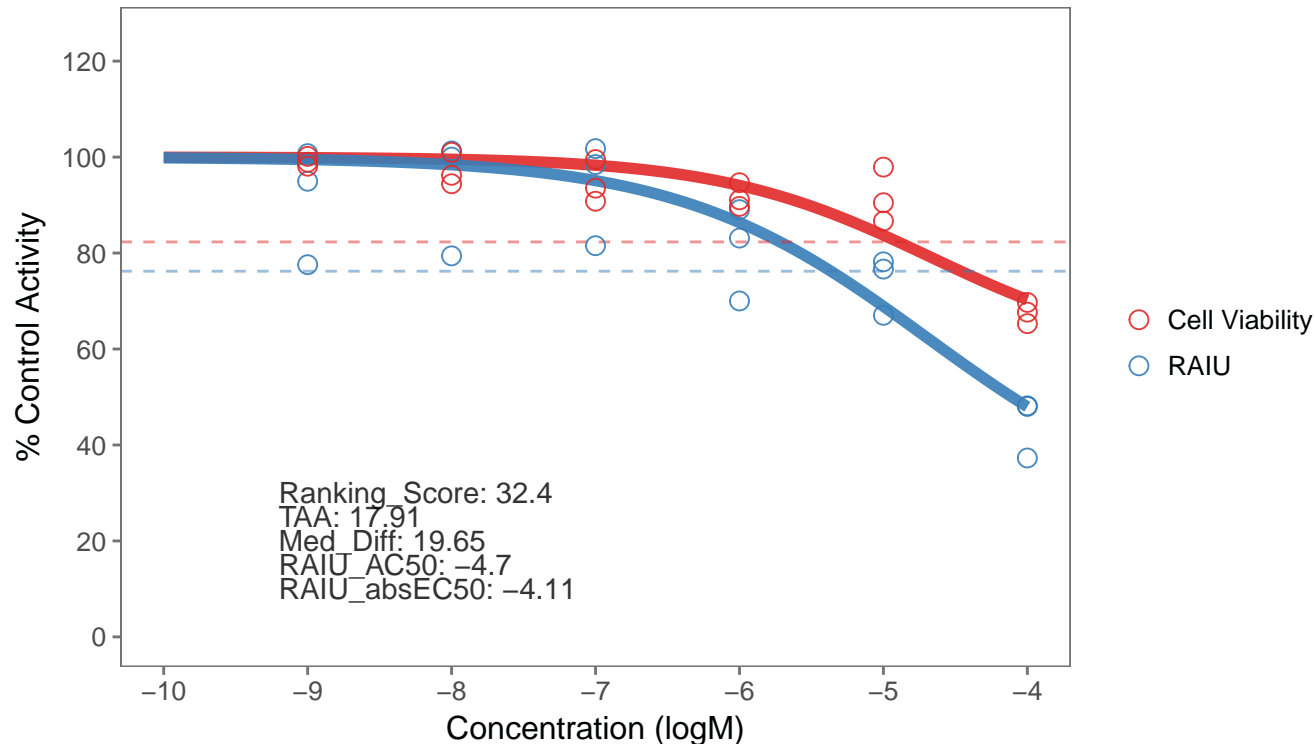

51. SPID: TP0001498B11

NAME: Triclosan

CAS NO: 3380-34-5

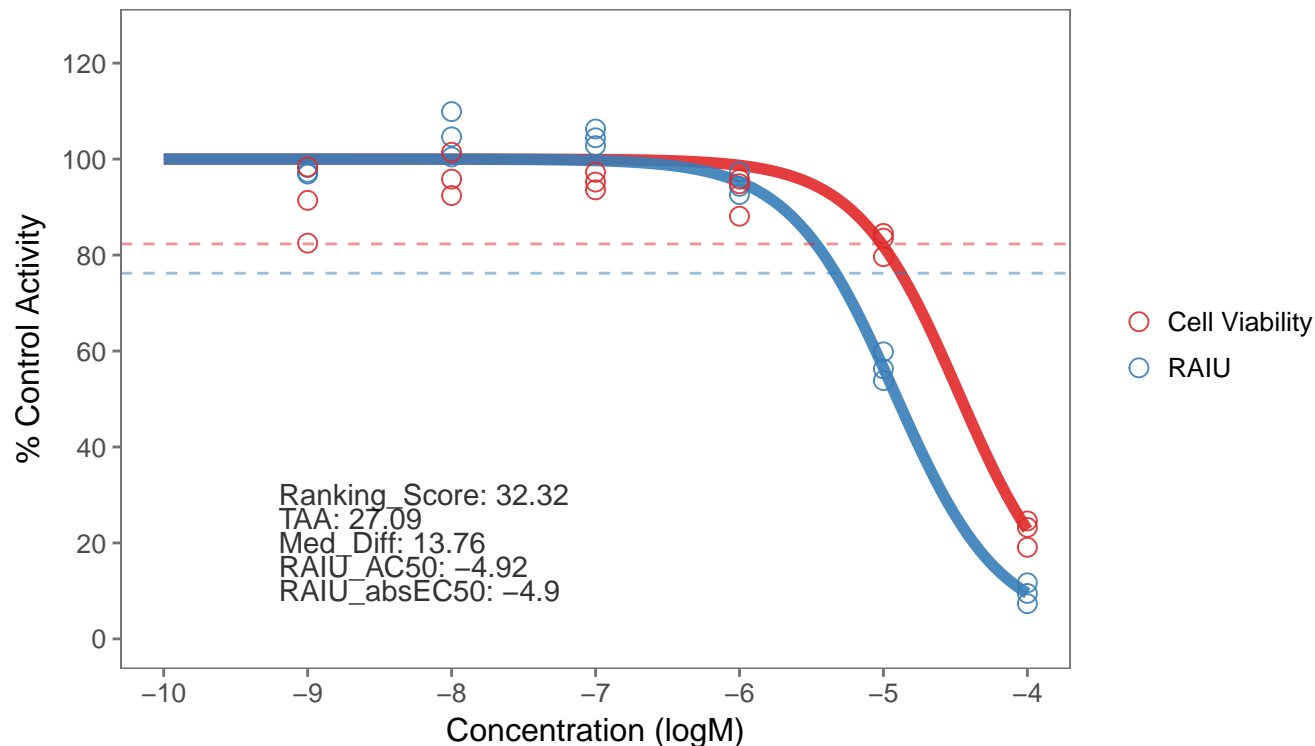



52. SPID: TP0001502C11  
NAME: Carfentrazone-ethyl  
CAS NO: 128639-02-1

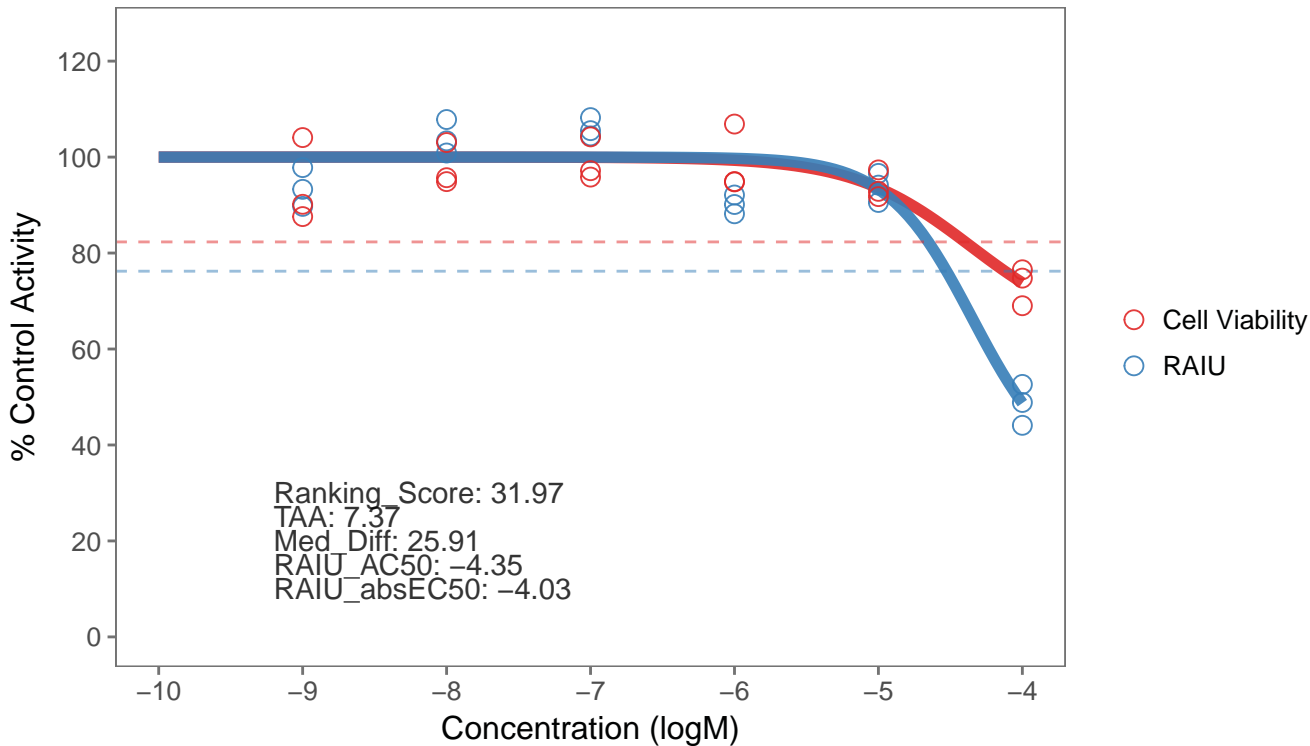

53. SPID: TP0001498A01  
NAME: Pirimiphos-methyl  
CAS NO: 29232-93-7

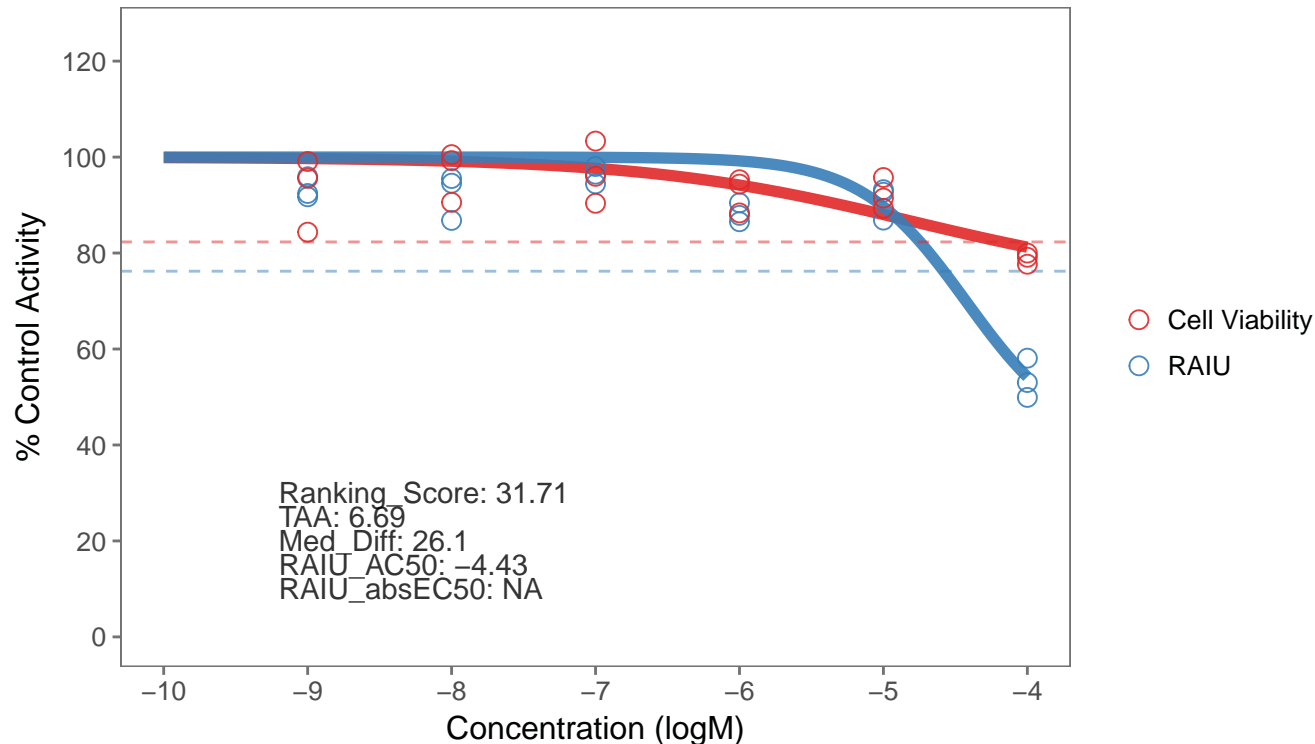

54. SPID: TP0001502G02  
NAME: Dibutyl phthalate  
CAS NO: 84-74-2

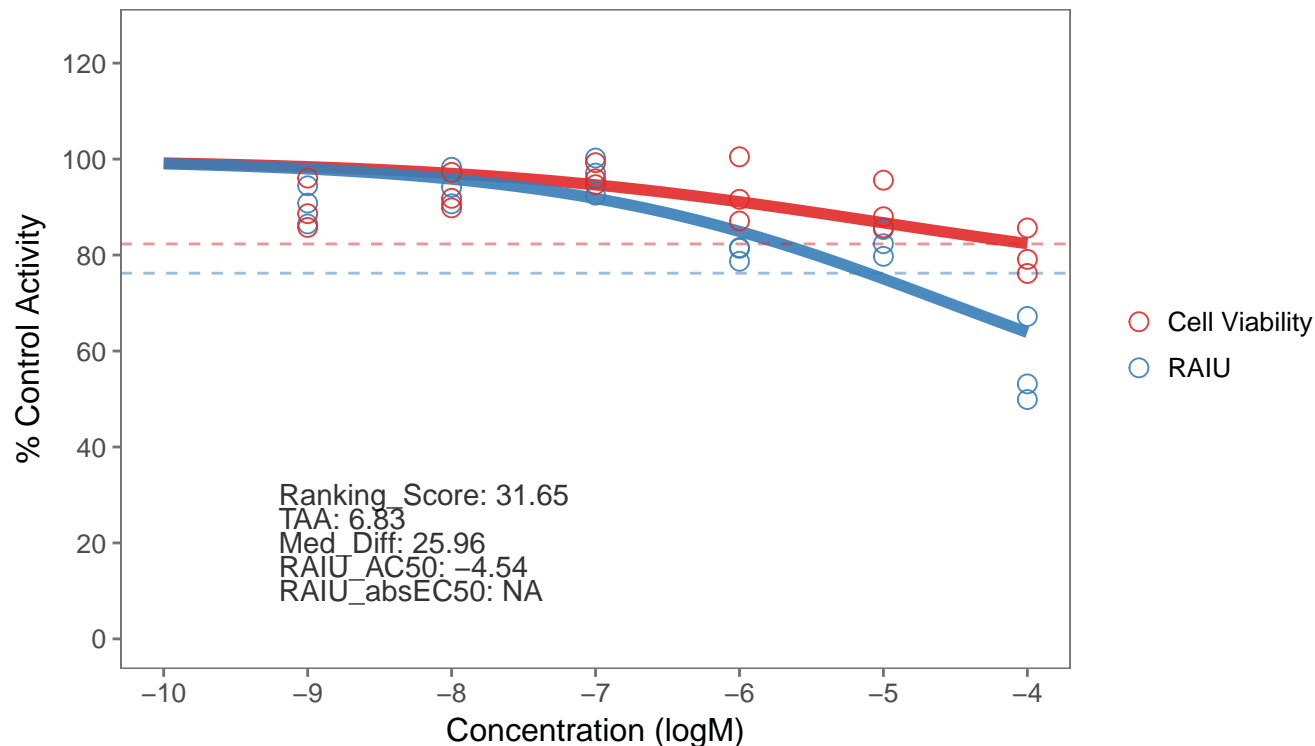

55. SPID: TP0001498C09  
NAME: Methylene bis(thiocyanate)  
CAS NO: 6317-18-6

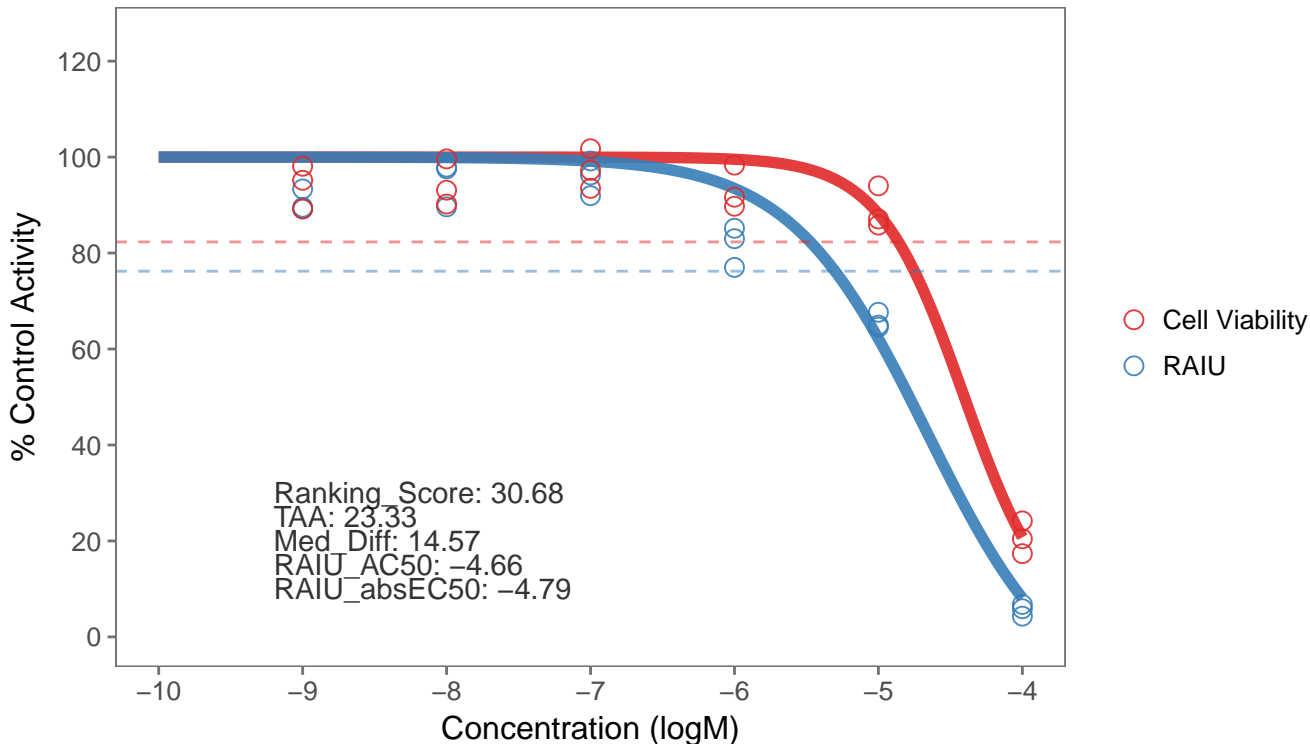

56. SPID: TP0001502D03

NAME: Bisphenol A

CAS NO: 80-05-7

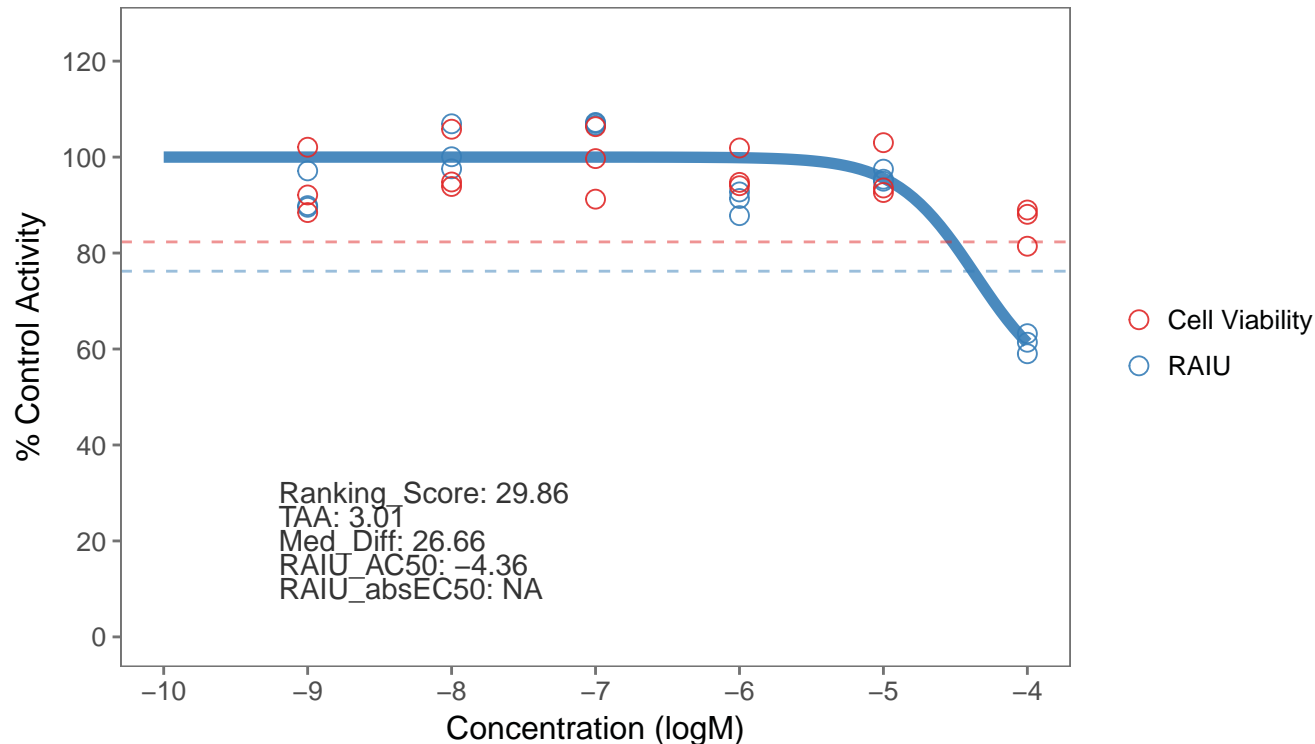

57. SPID: TP0001498B08

NAME: Dithiopyr

CAS NO: 97886-45-8

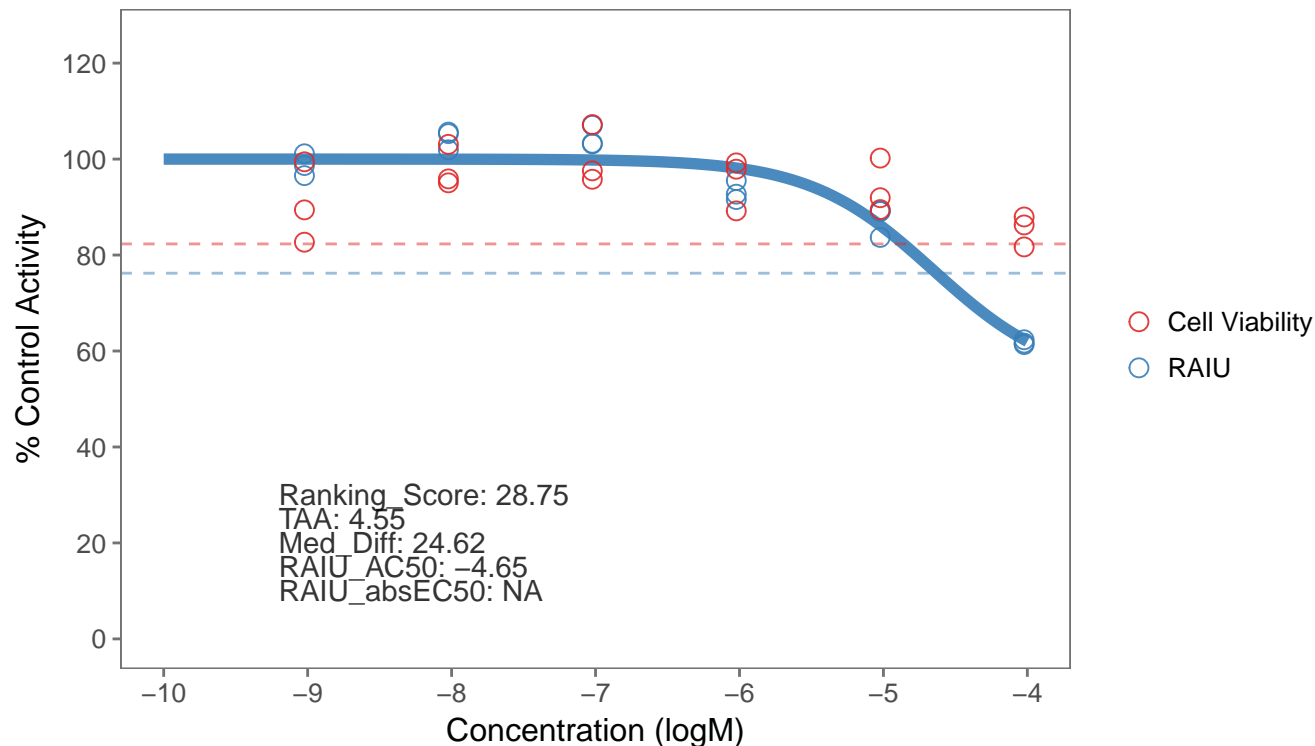

58. SPID: TP0001500D05  
NAME: Tebufenpyrad  
CAS NO: 119168-77-3

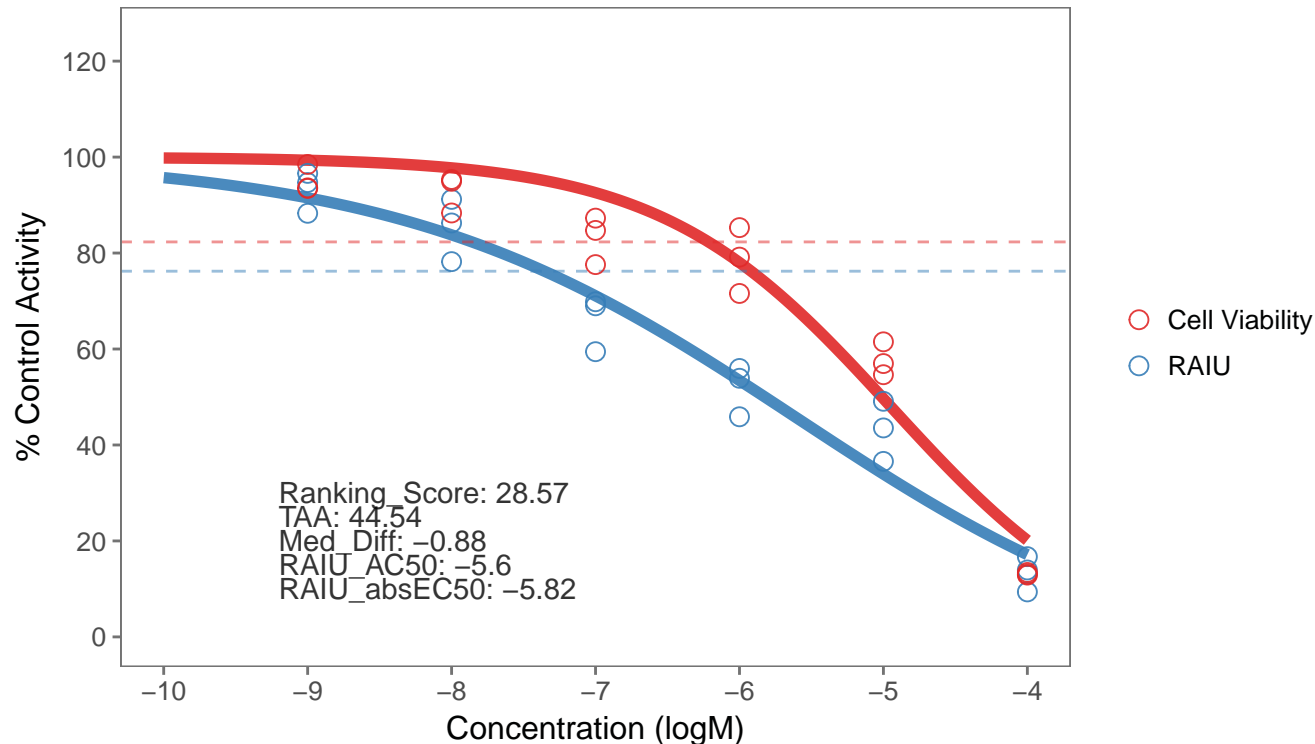

59. SPID: TP0001502D04

NAME: Diclofop-methyl

CAS NO: 51338-27-3

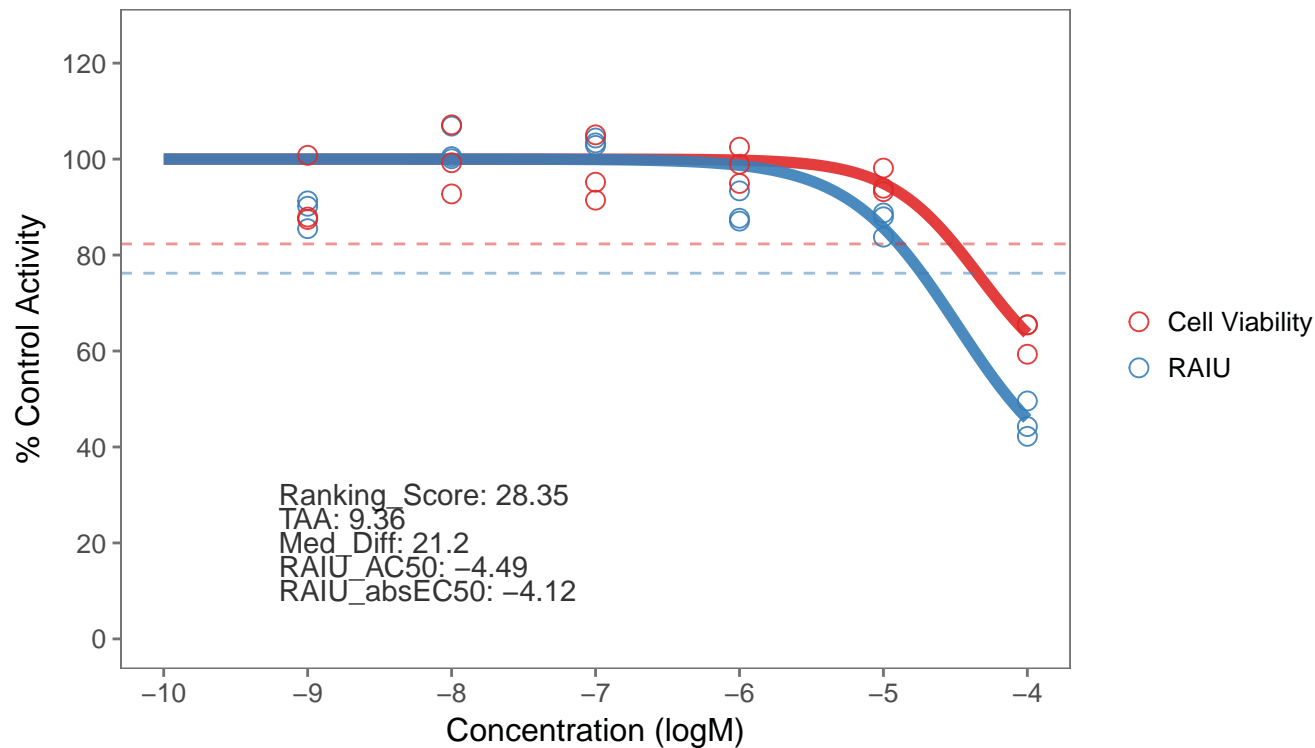



60. SPID: TP0001500G11  
NAME: Dibutyl phthalate  
CAS NO: 84-74-2

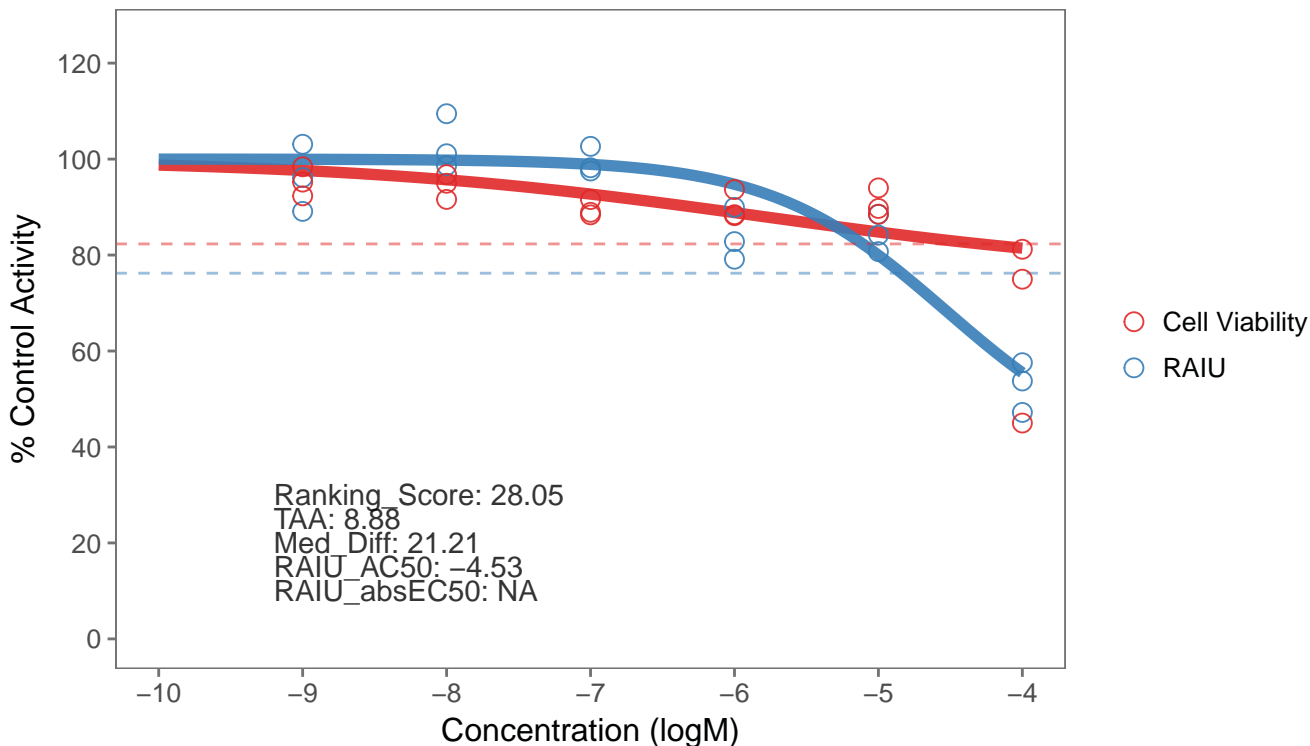

61. SPID: TP0001498G03

NAME: Lactofen

CAS NO: 77501-63-4

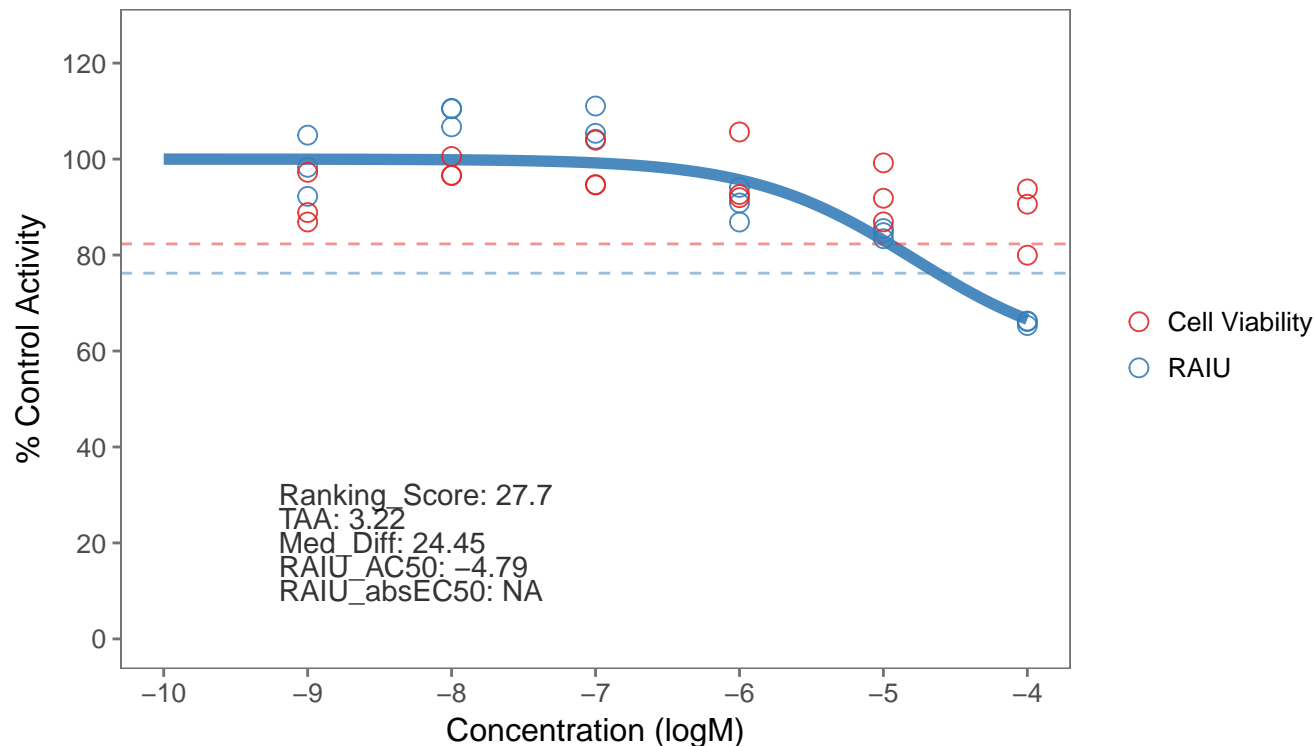

62. SPID: TP0001500C09  
NAME: Piperonyl butoxide  
CAS NO: 51-03-6

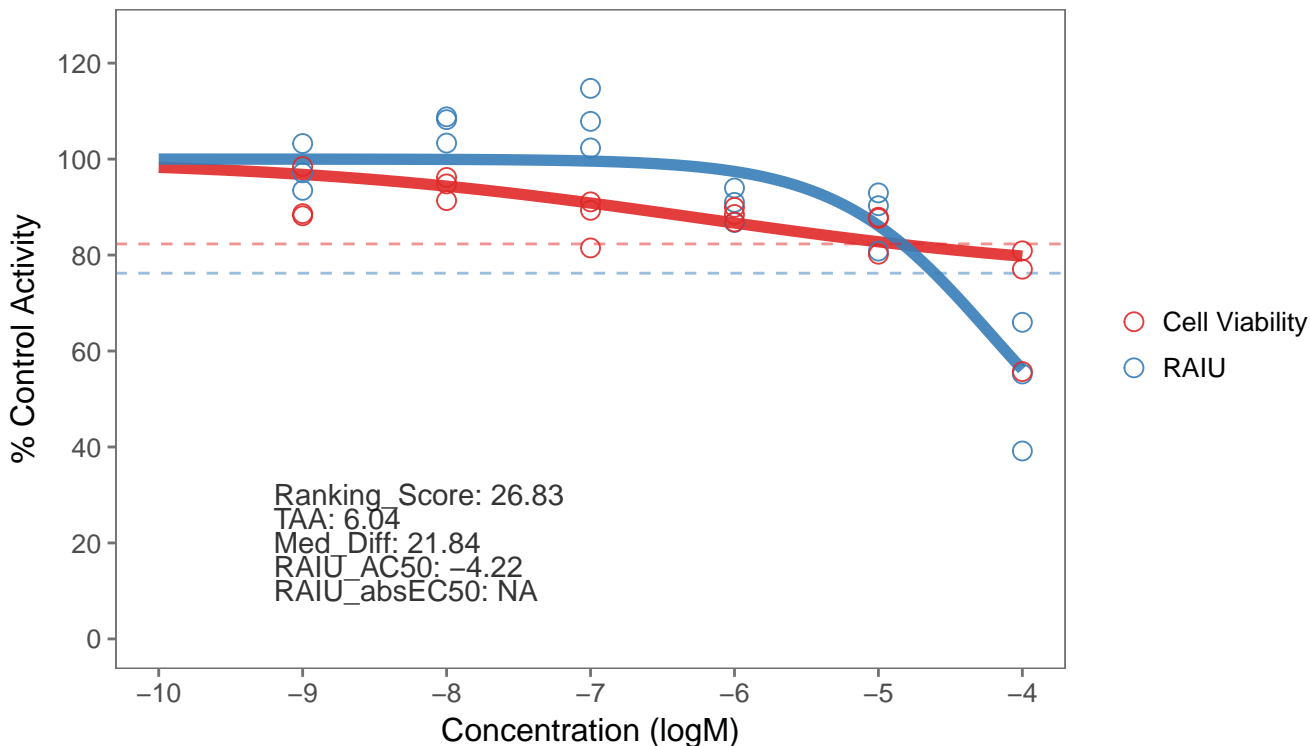

63. SPID: TP0001500B08

NAME: Buprofezin

CAS NO: 69327-76-0

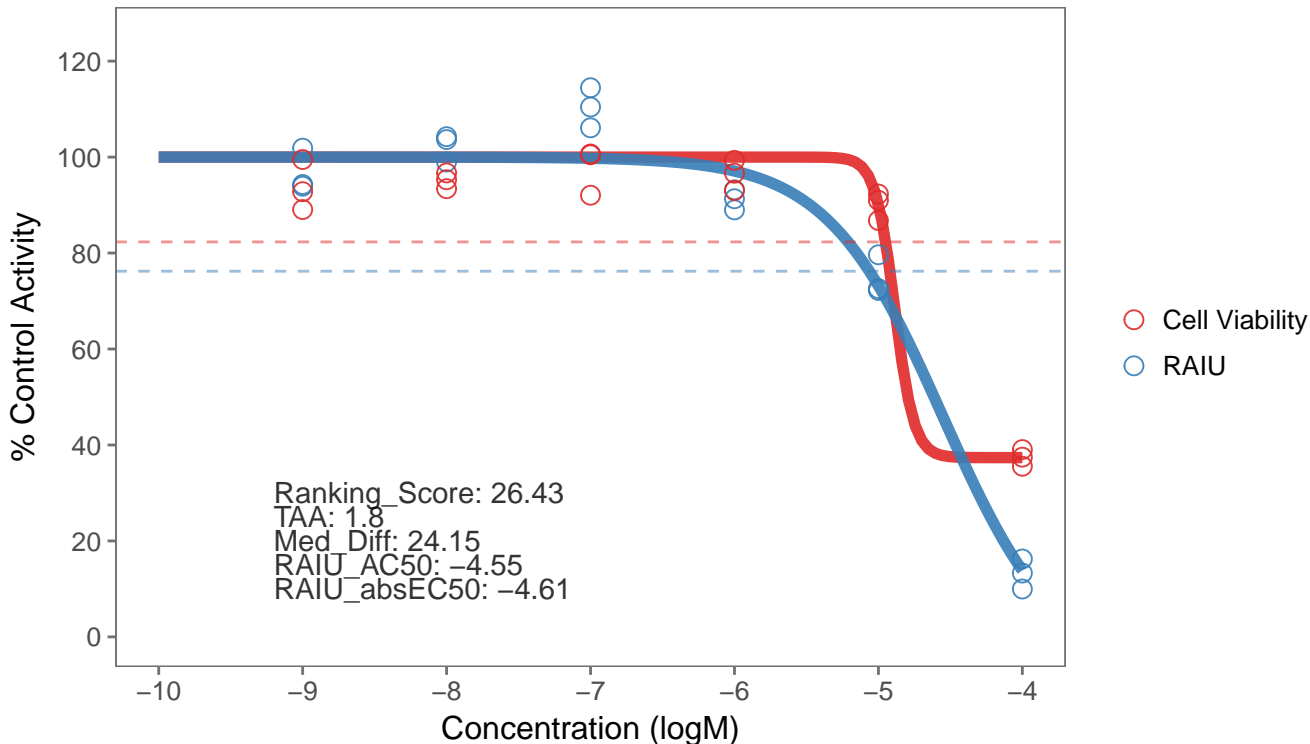

64. SPID: TP0001502G03

NAME: Cloprop

CAS NO: 101-10-0

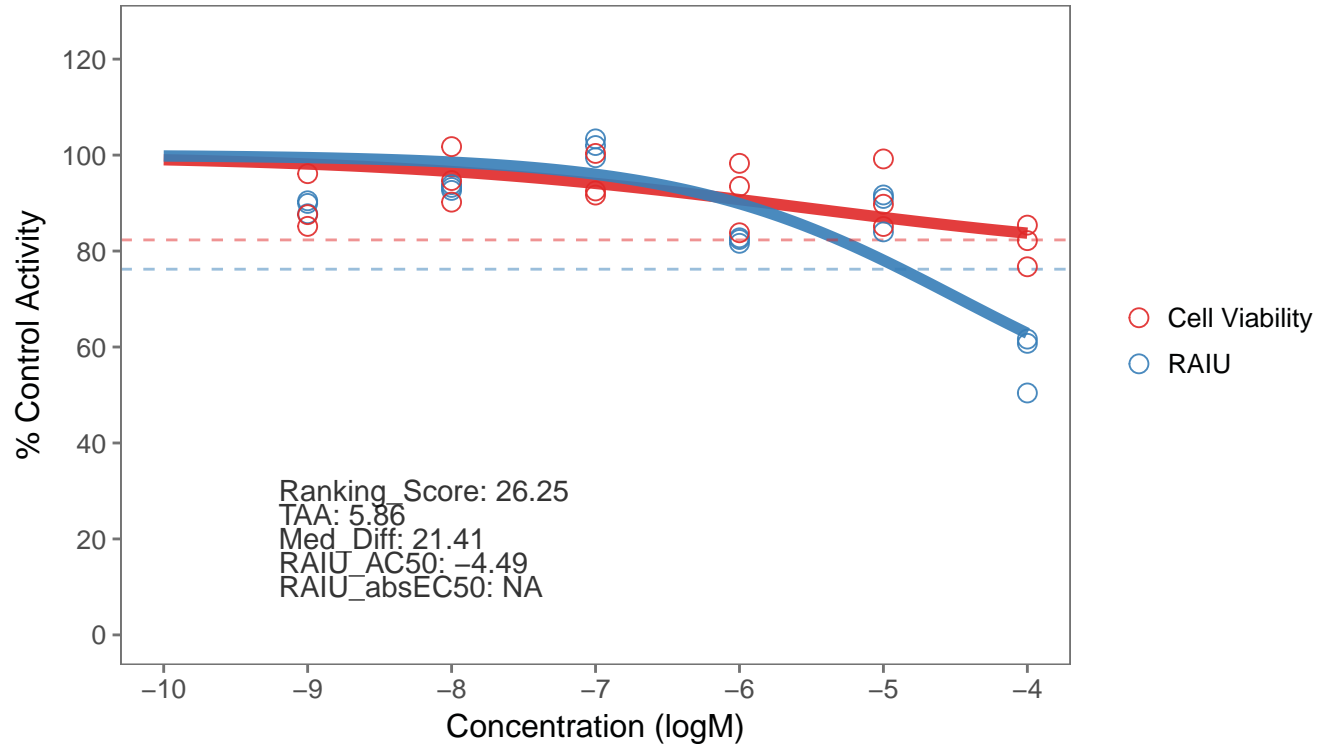

65. SPID: TP0001498C10

NAME: Flutolanil

CAS NO: 66332-96-5

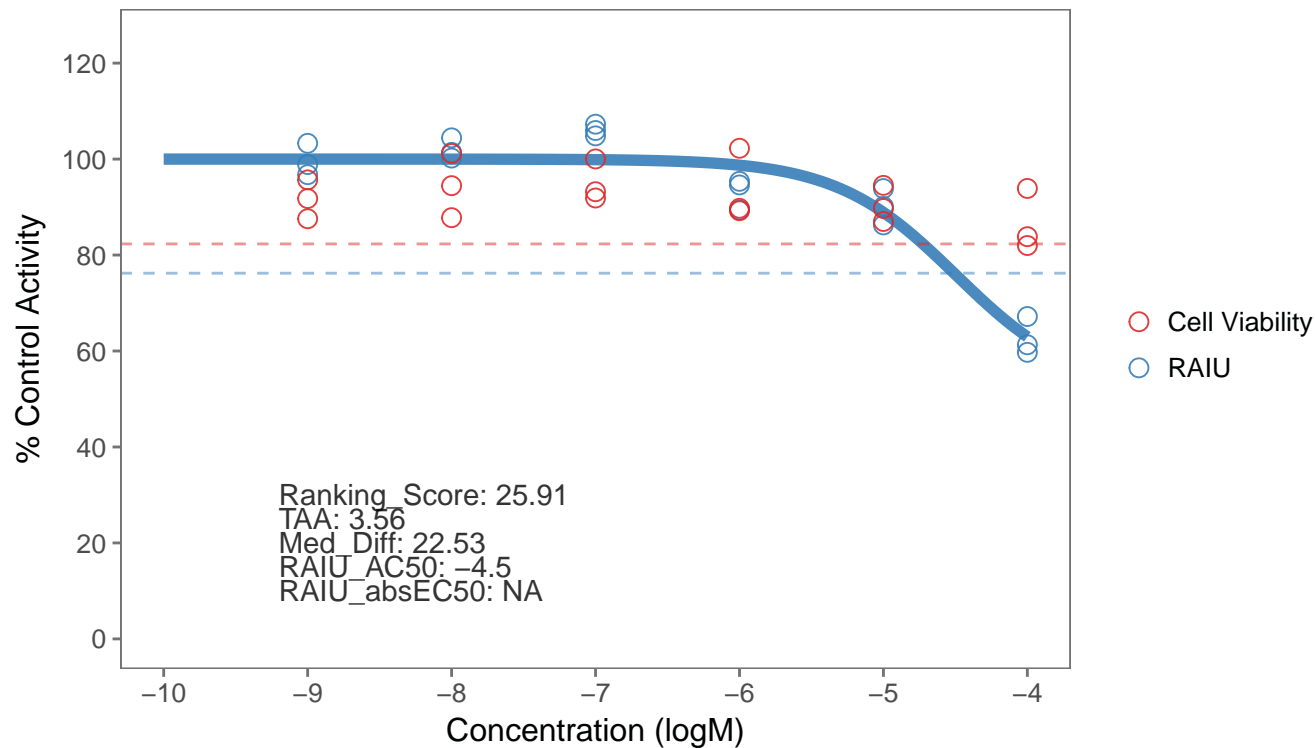

66. SPID: TP0001500G03

NAME: Cinmethylin

CAS NO: 87818-31-3

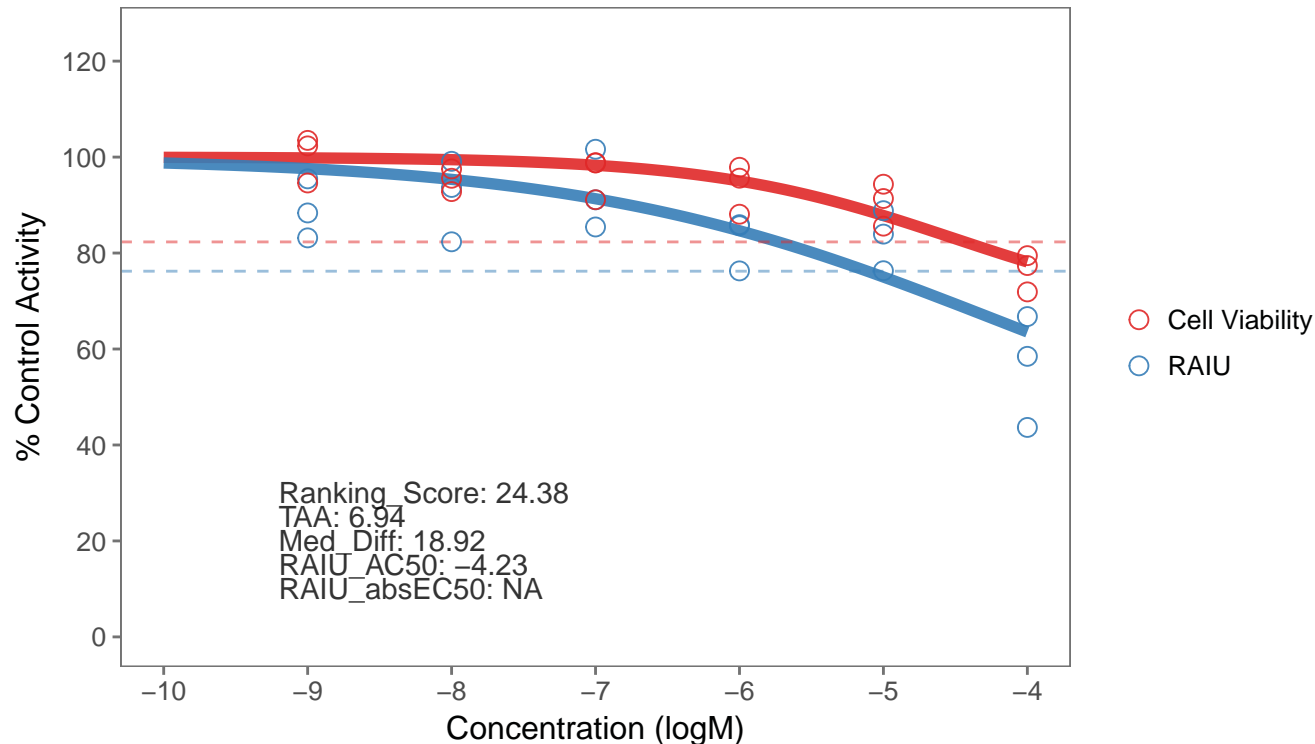

67. SPID: TP0001502D09

NAME: Chlorpropham

CAS NO: 101-21-3

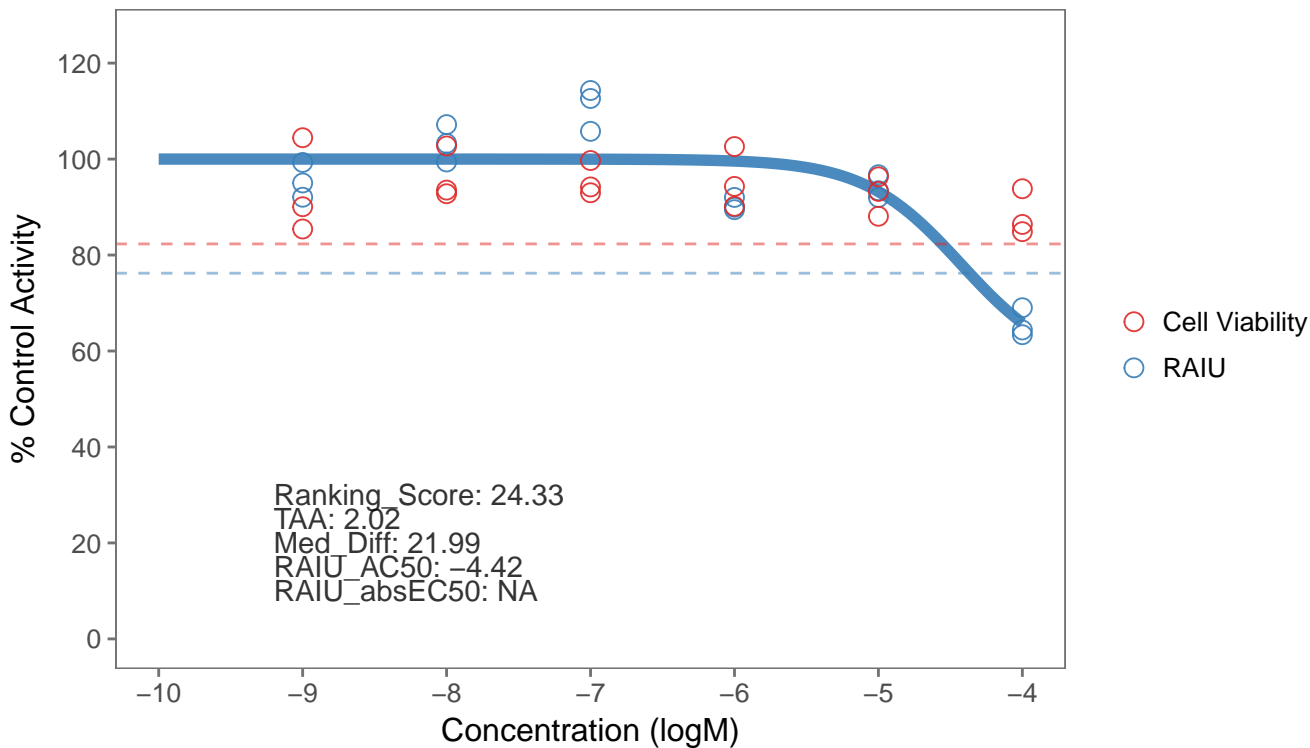



68. SPID: TP0001499C09  
NAME: Clodinafop-propargyl  
CAS NO: 105512-06-9

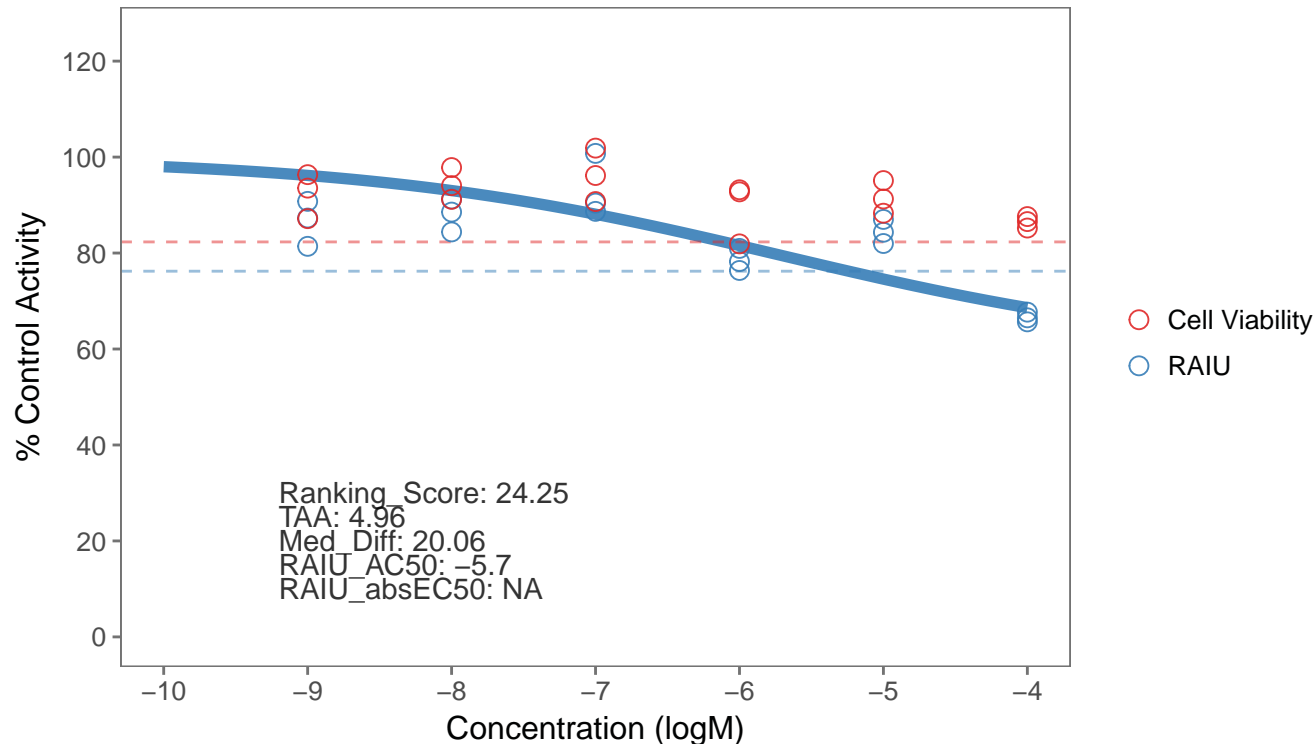

69. SPID: TP0001501G11

NAME: Phosalone

CAS NO: 2310-17-0

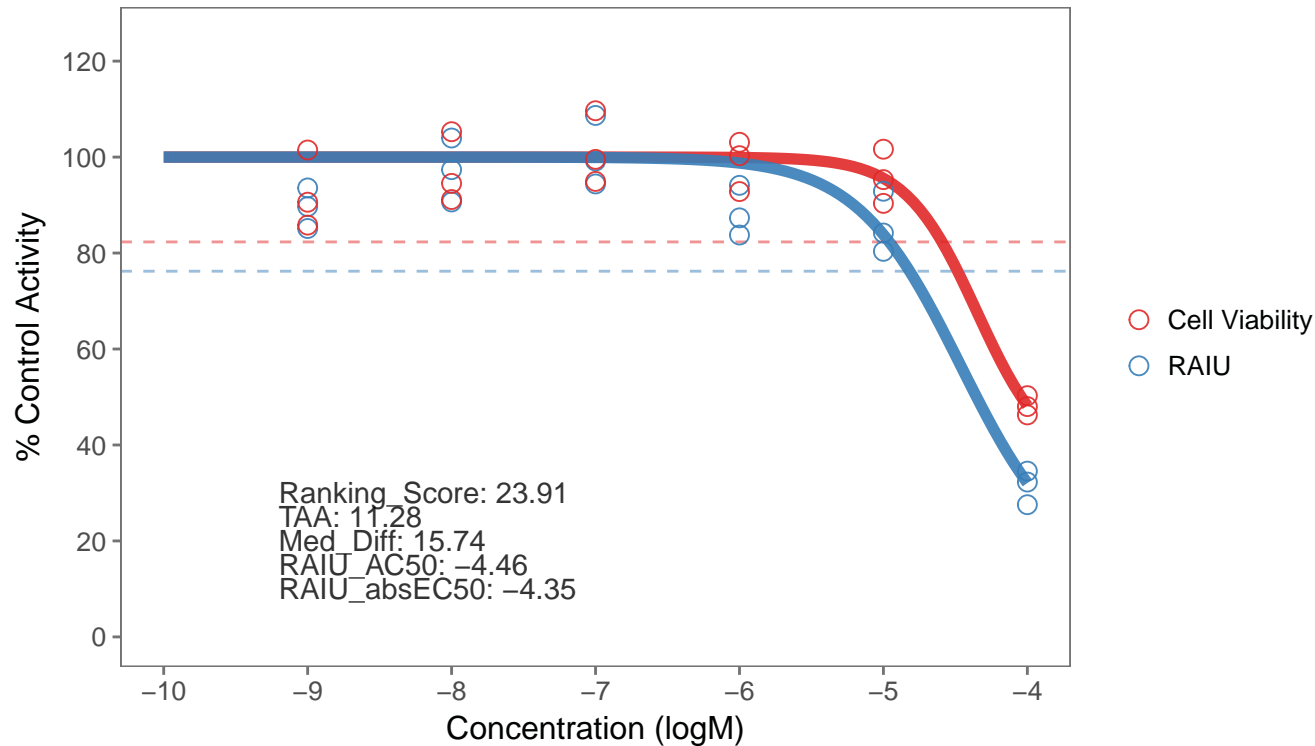

70. SPID: TP0001502F05  
NAME: Allethrin  
CAS NO: 584-79-2

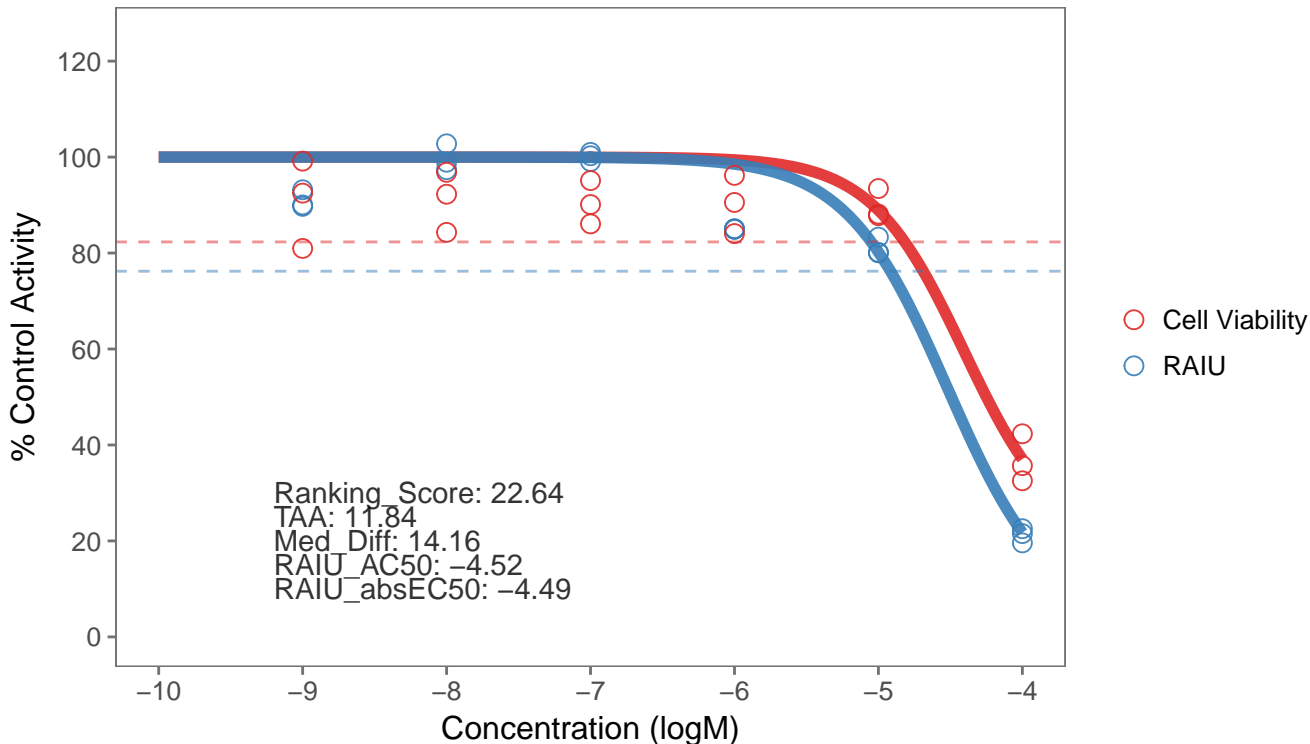

71. SPID: TP0001501G10

NAME: Disulfoton

CAS NO: 298-04-4

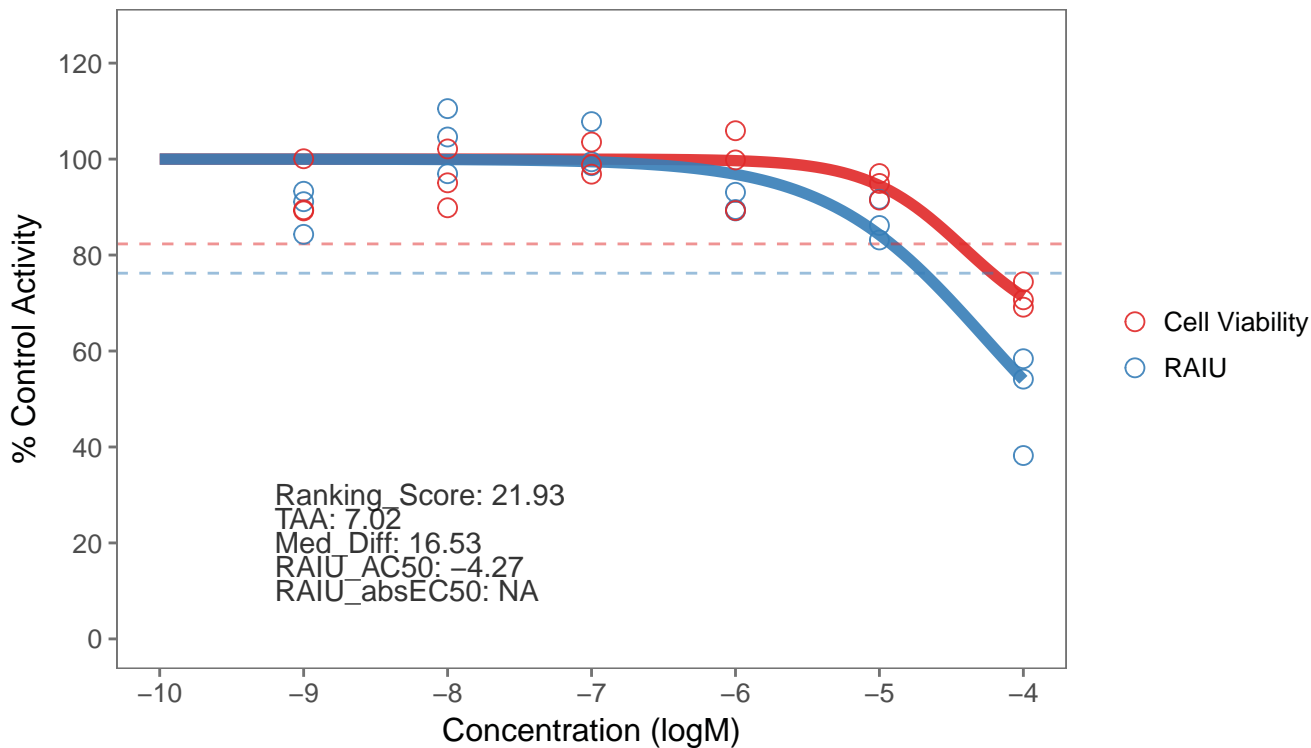

72. SPID: TP0001502B05  
NAME: Flumiclorac-pentyl  
CAS NO: 87546-18-7

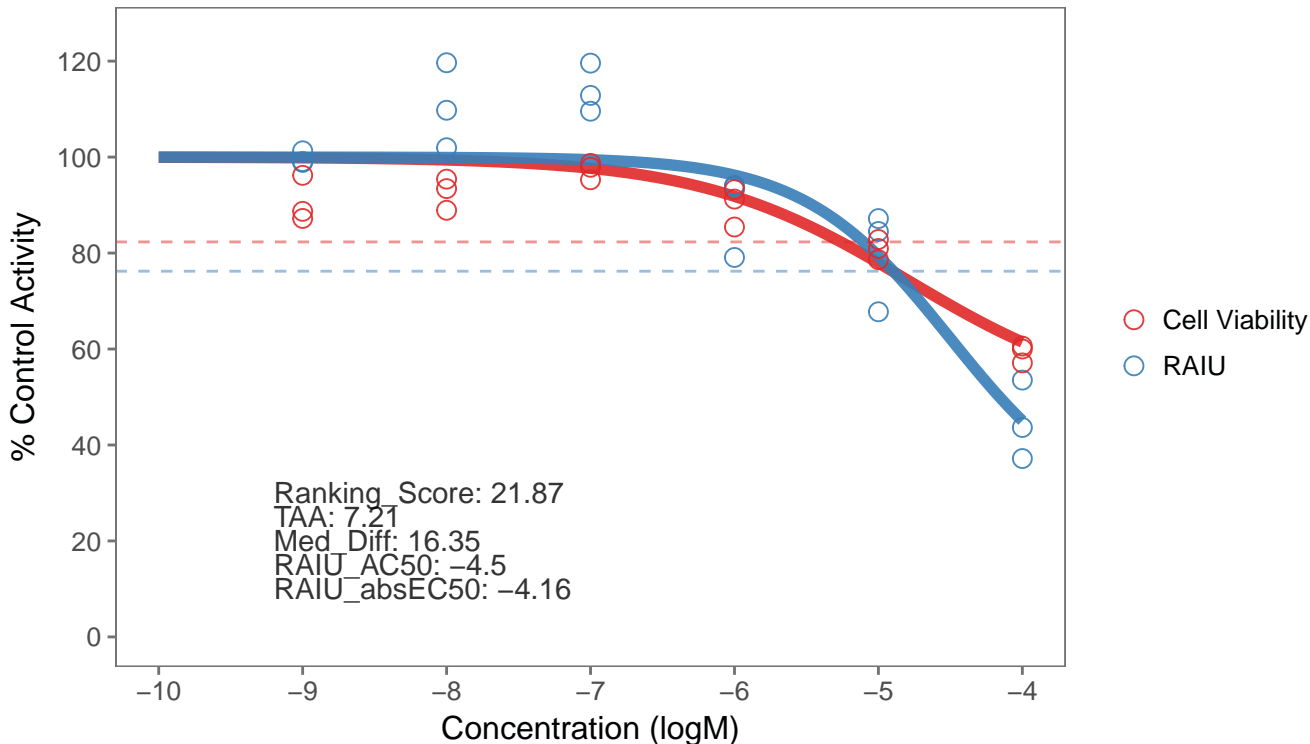

73. SPID: TP0001502D11  
NAME: Forchlorfenuron  
CAS NO: 68157-60-8

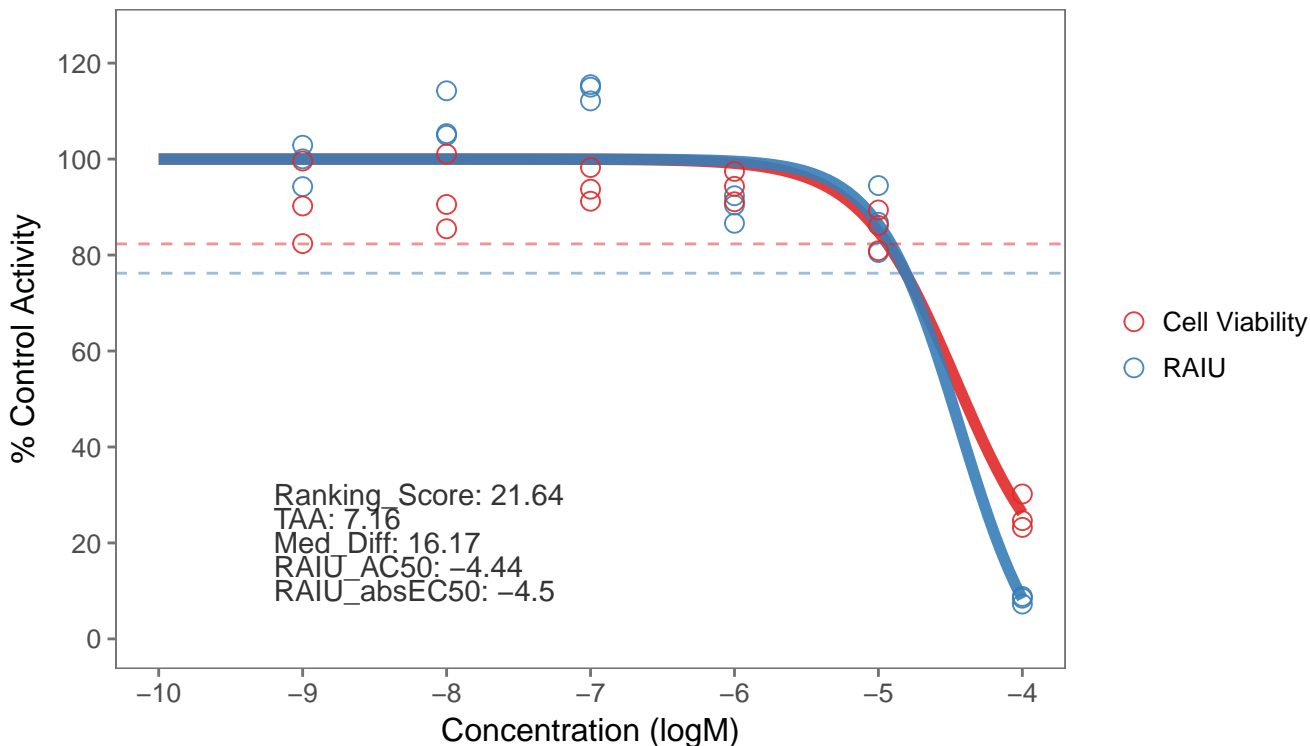

74. SPID: TP0001500F07

NAME: Flumetralin

CAS NO: 62924-70-3

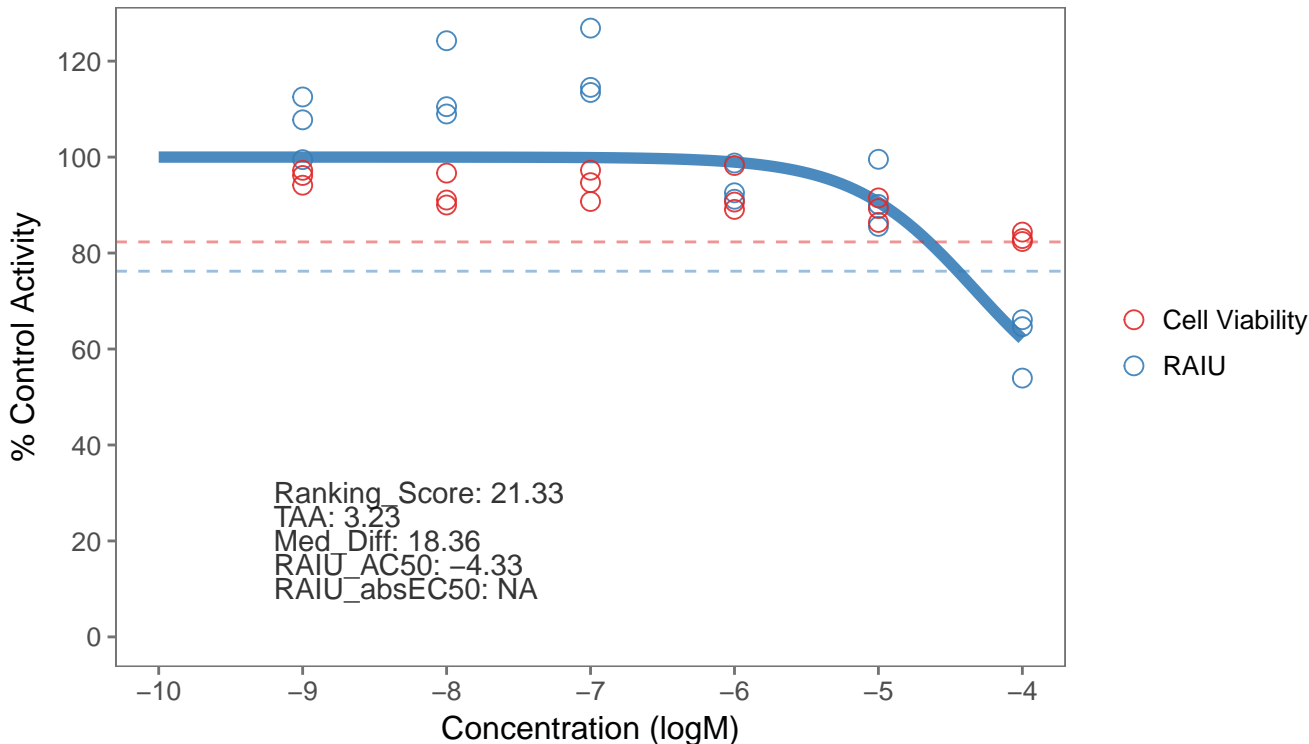

75. SPID: TP0001501E03

NAME: Ethalfluralin

CAS NO: 55283-68-6

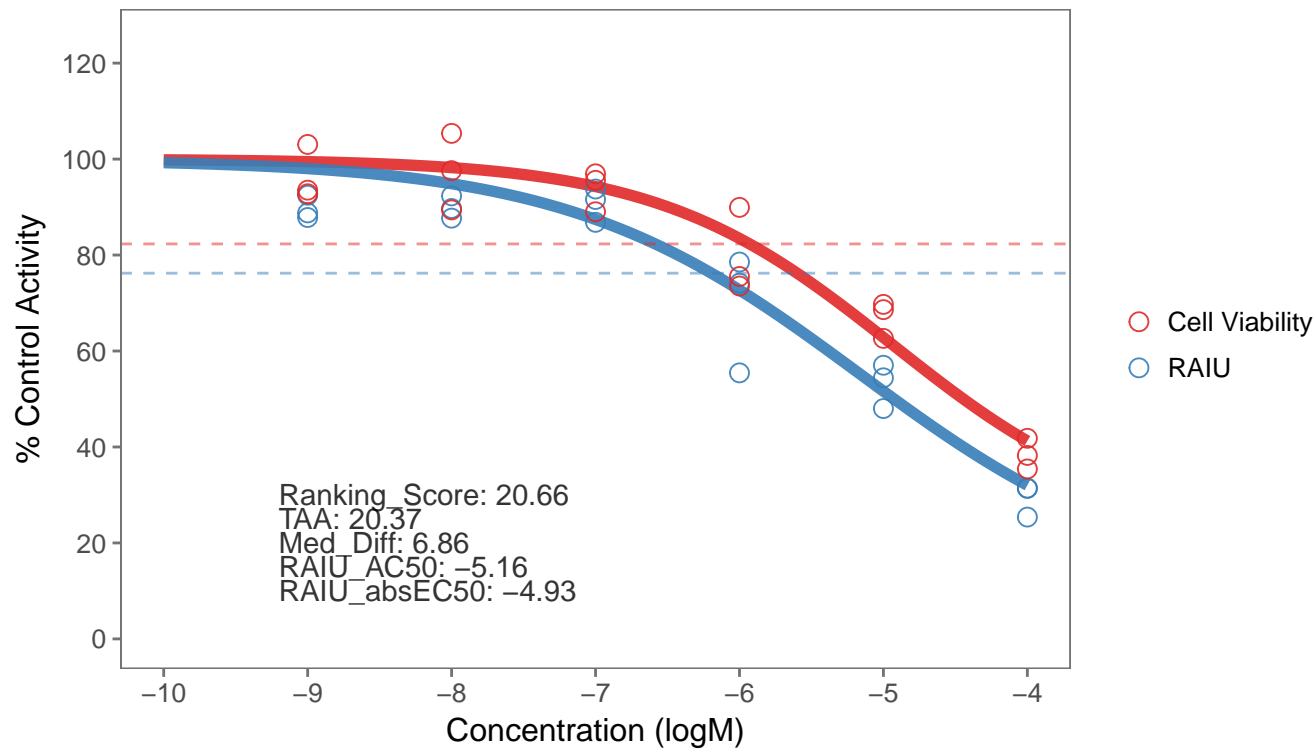



76. SPID: TP0001500B09

NAME: Lindane

CAS NO: 58-89-9

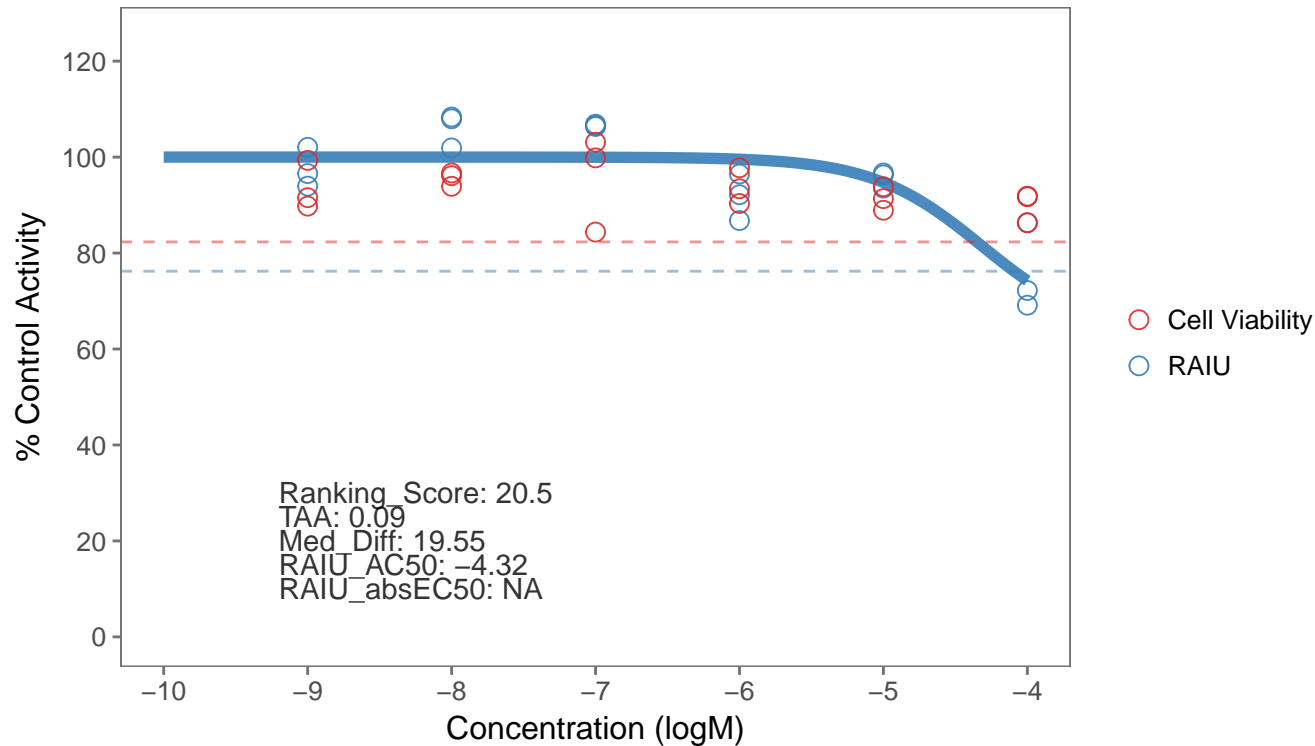

77. SPID: TP0001500G08

NAME: Fluazinam

CAS NO: 79622-59-6

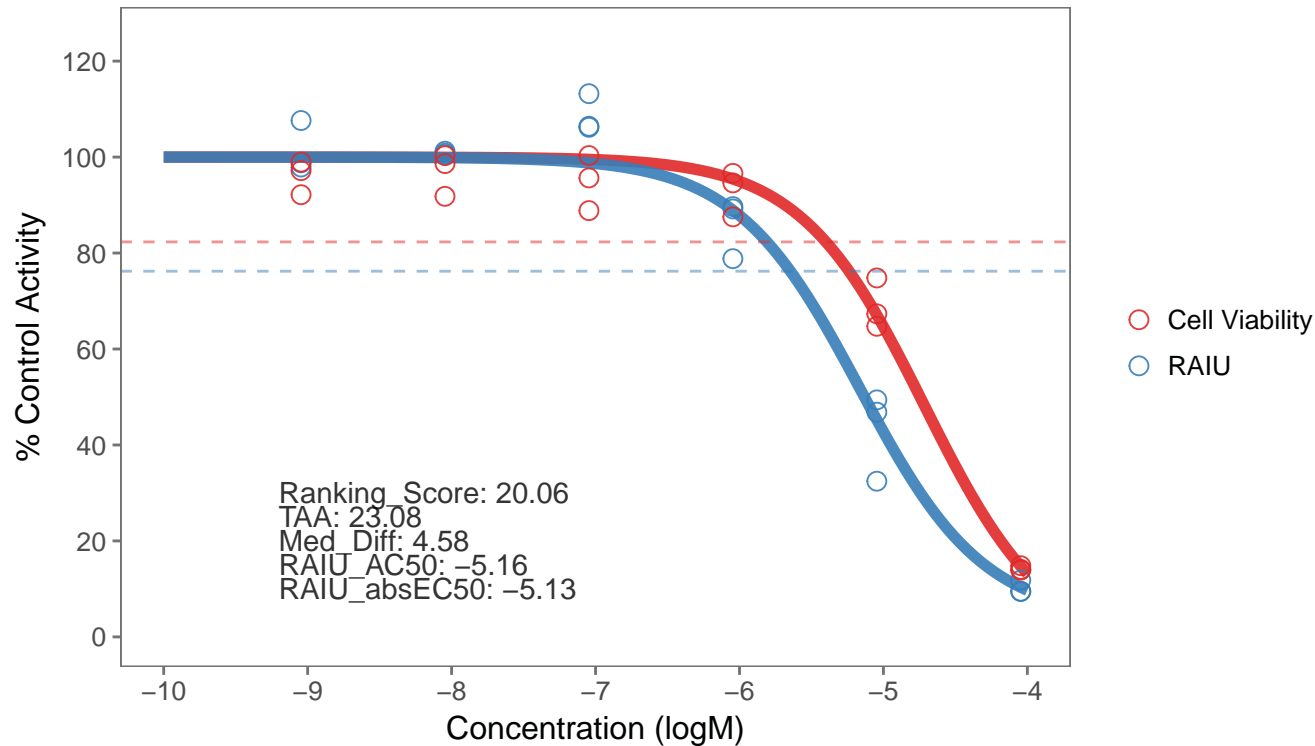

78. SPID: TP0001501D02  
NAME: Cyfluthrin  
CAS NO: 68359-37-5

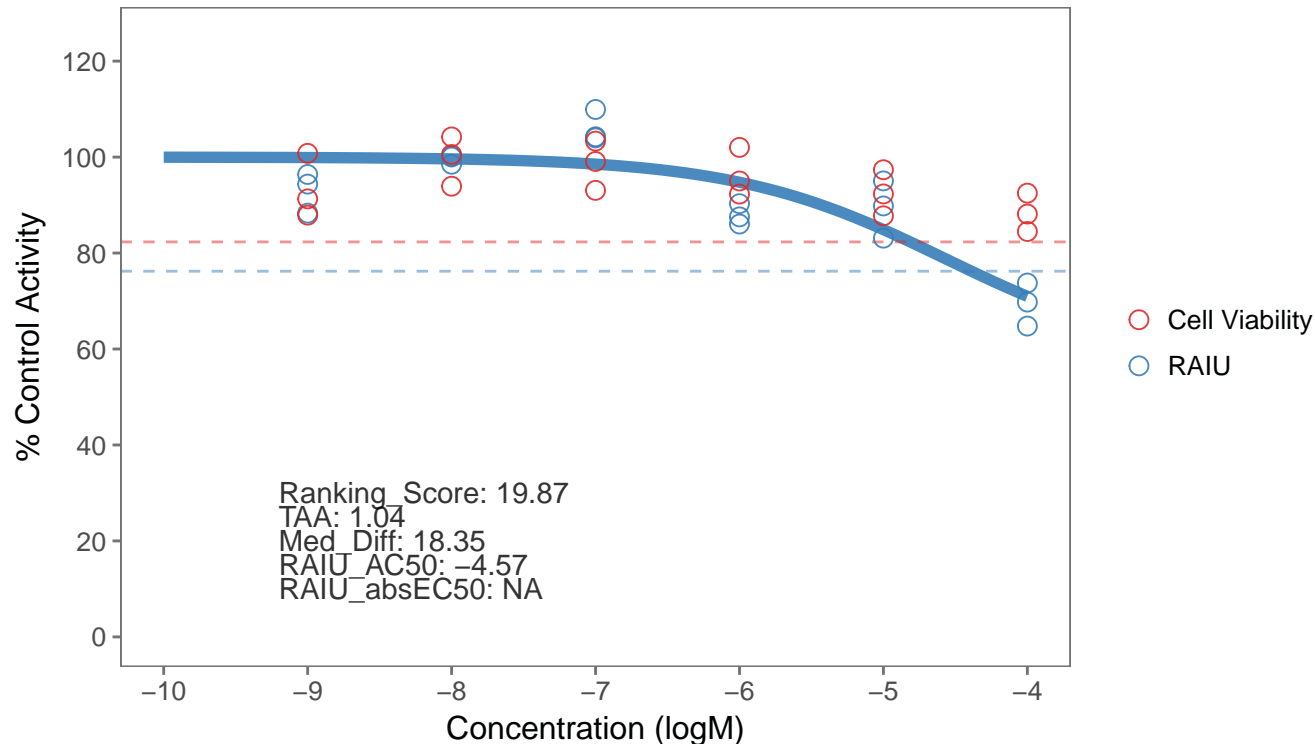

79. SPID: TP0001499D02

NAME: Tri-allate

CAS NO: 2303-17-5

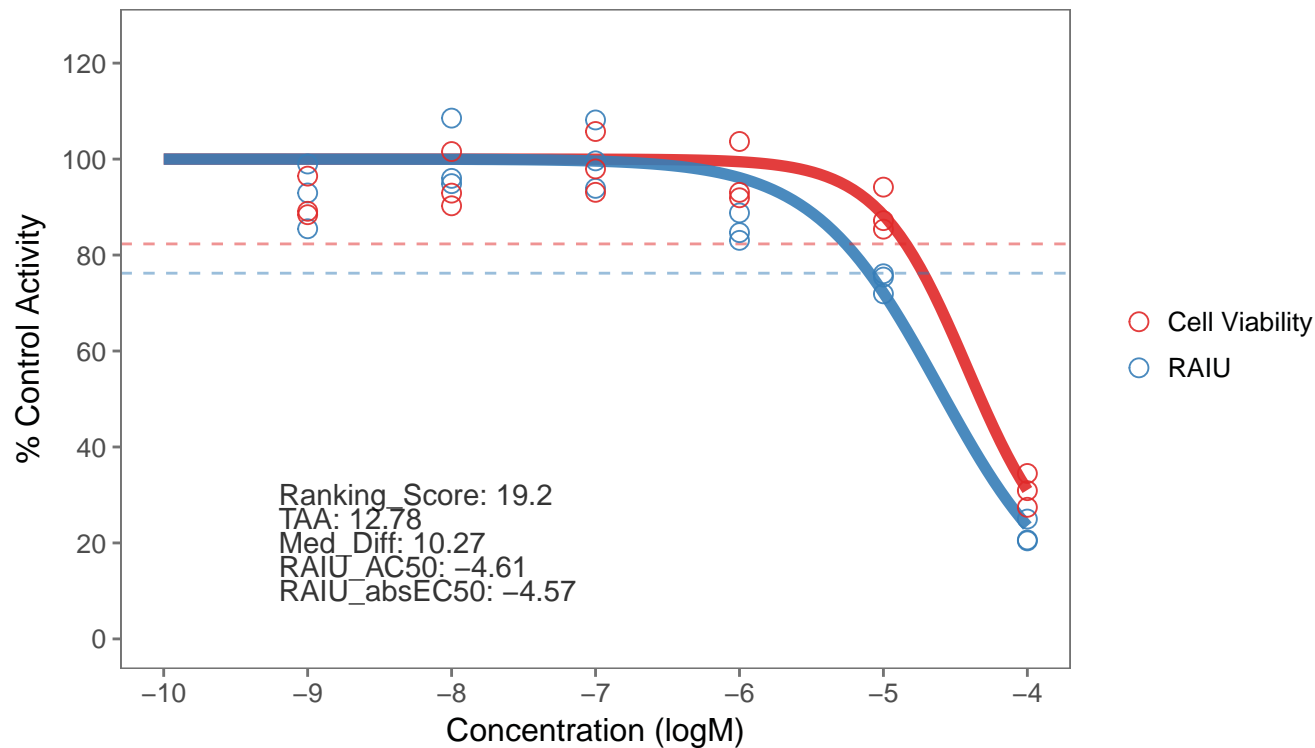

80. SPID: TP0001502G07

NAME: Imazalil

CAS NO: 35554-44-0

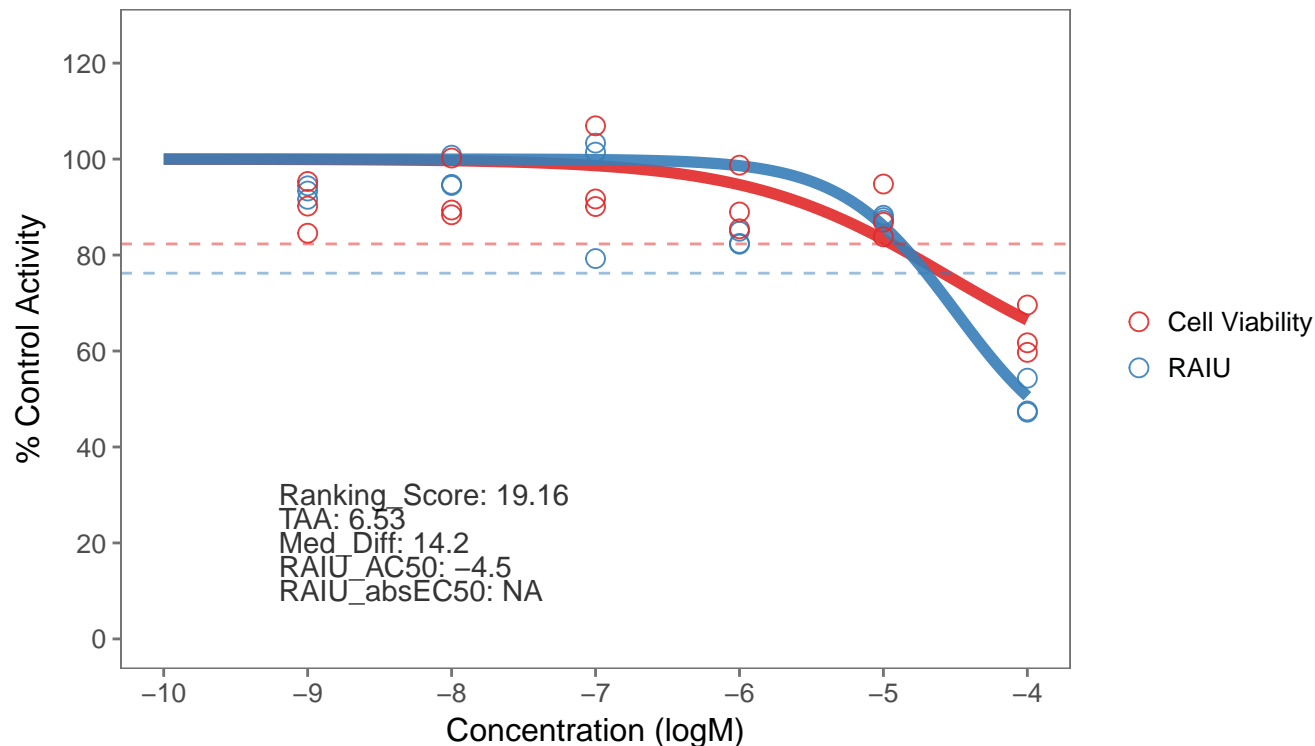

81. SPID: TP0001502E08

NAME: Cypermethrin

CAS NO: 52315-07-8

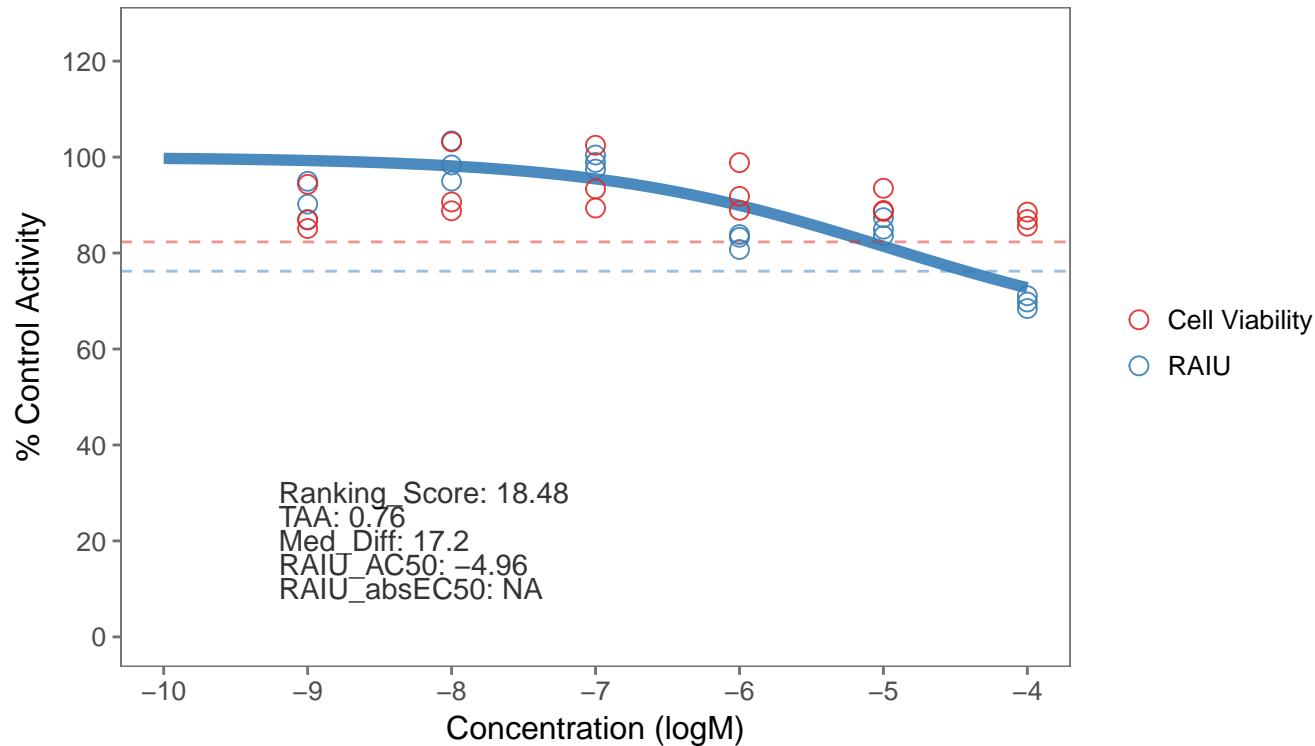

82. SPID: TP0001500F09

NAME: Amitraz

CAS NO: 33089-61-1

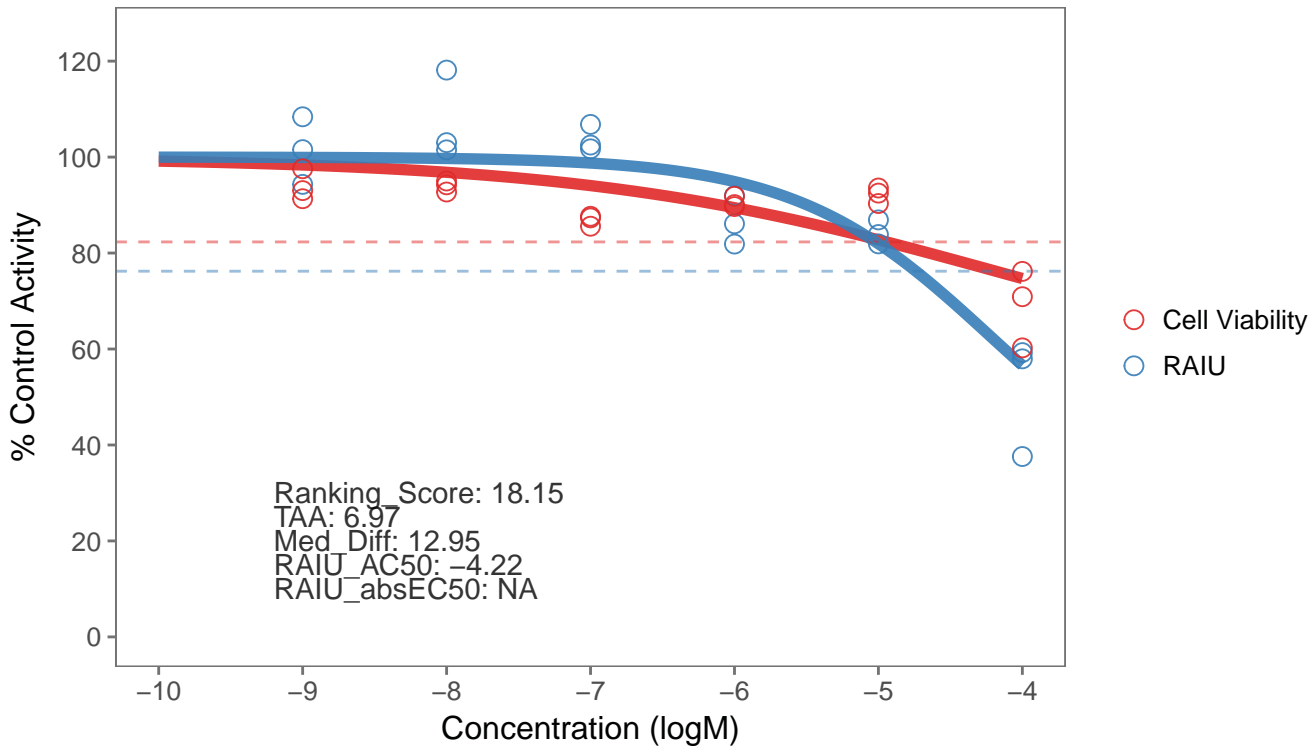

83. SPID: TP0001499E11  
NAME: Tetraconazole  
CAS NO: 112281-77-3

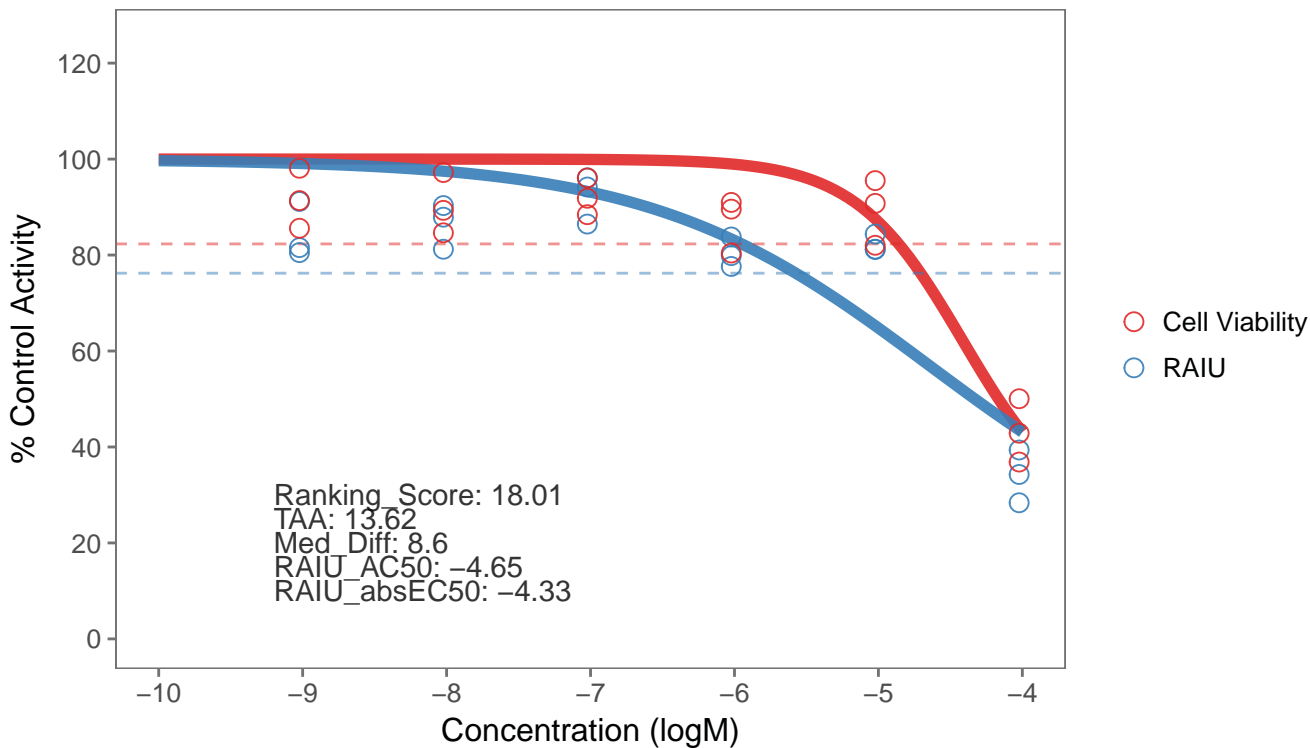



84. SPID: TP0001502C07

NAME: Thiazopyr

CAS NO: 117718-60-2

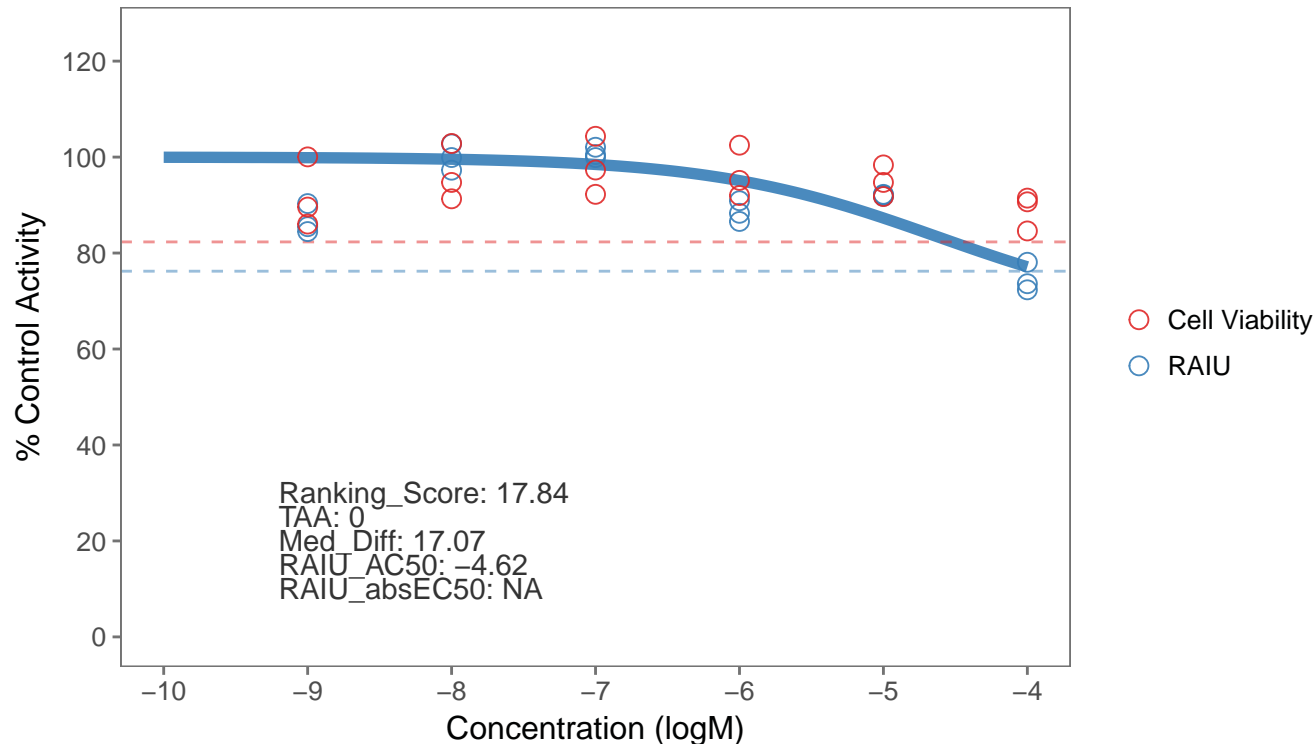

85. SPID: TP0001502E02

NAME: Trifluralin

CAS NO: 1582-09-8

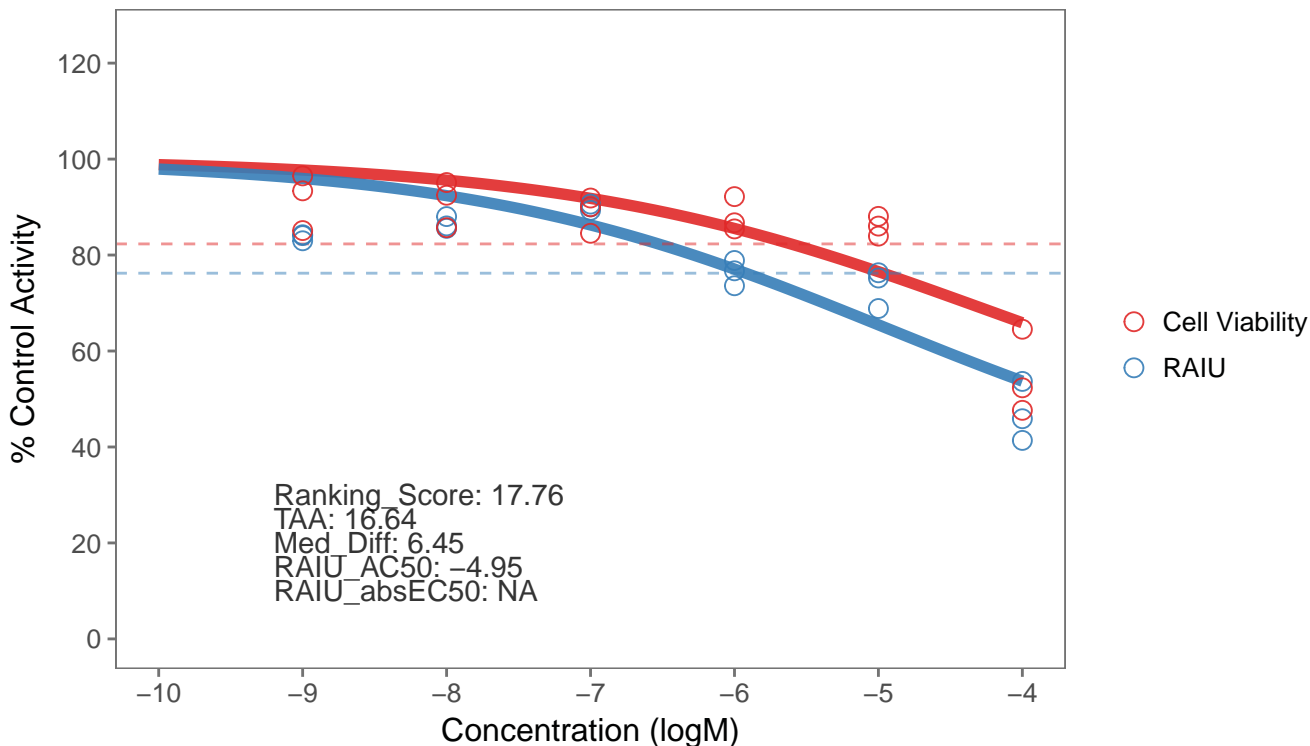

86. SPID: TP0001500F11  
NAME: Tebufenozide  
CAS NO: 112410-23-8

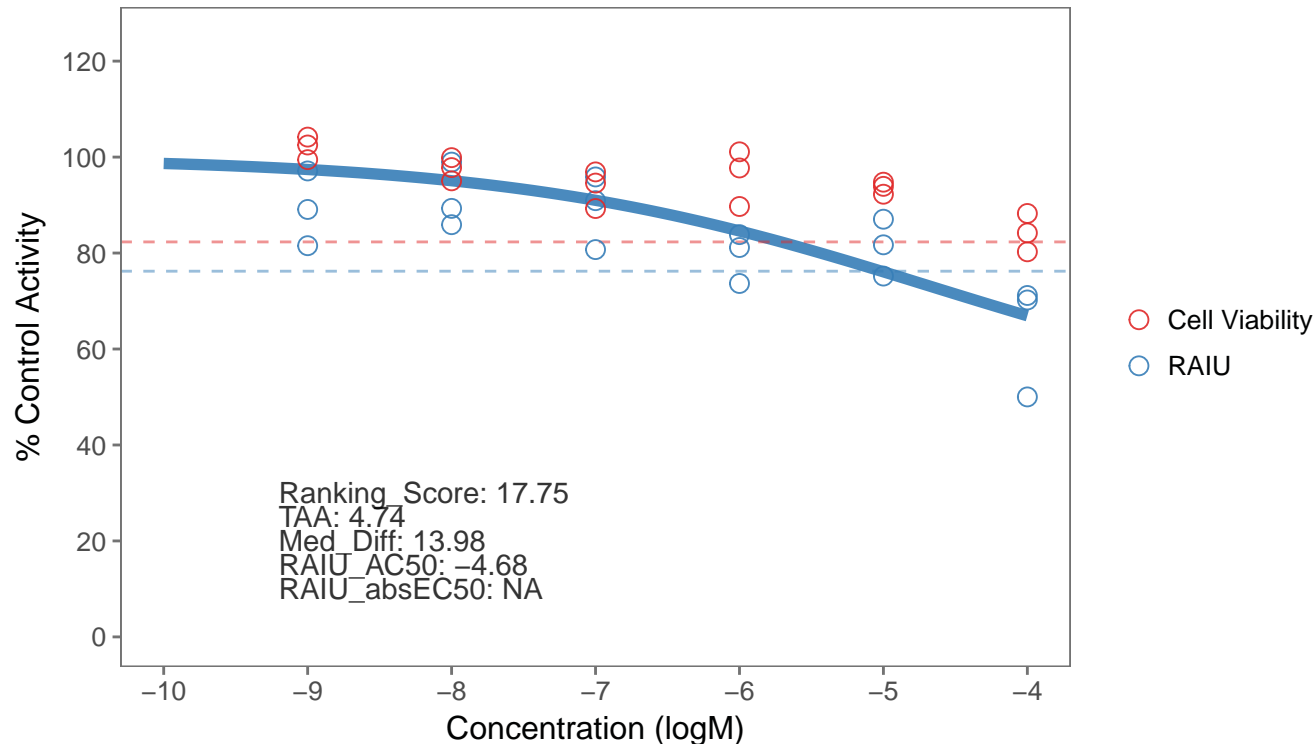

87. SPID: TP0001502B07  
NAME: Azoxystrobin  
CAS NO: 131860-33-8

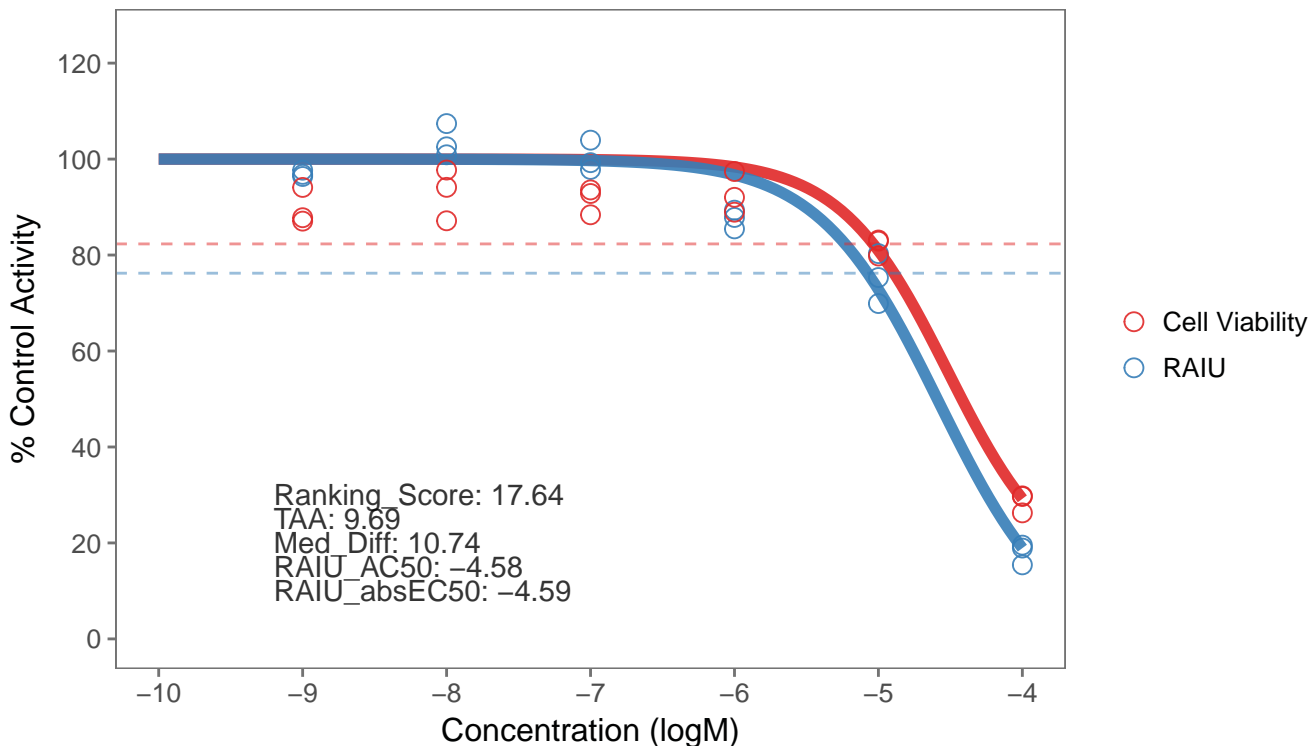

88. SPID: TP0001501B01

NAME: Mancozeb

CAS NO: 8018-01-7

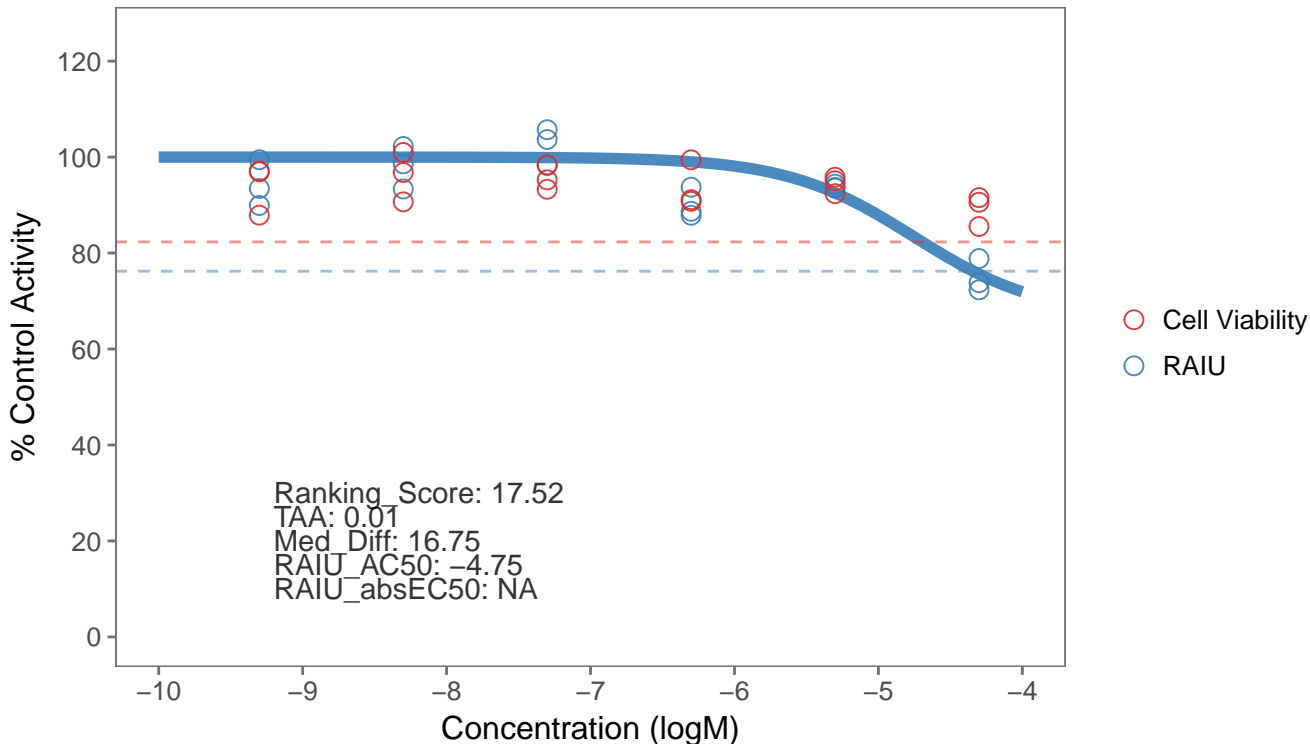

89. SPID: TP0001500F01

NAME: Fluazifop-butyl

CAS NO: 69806-50-4

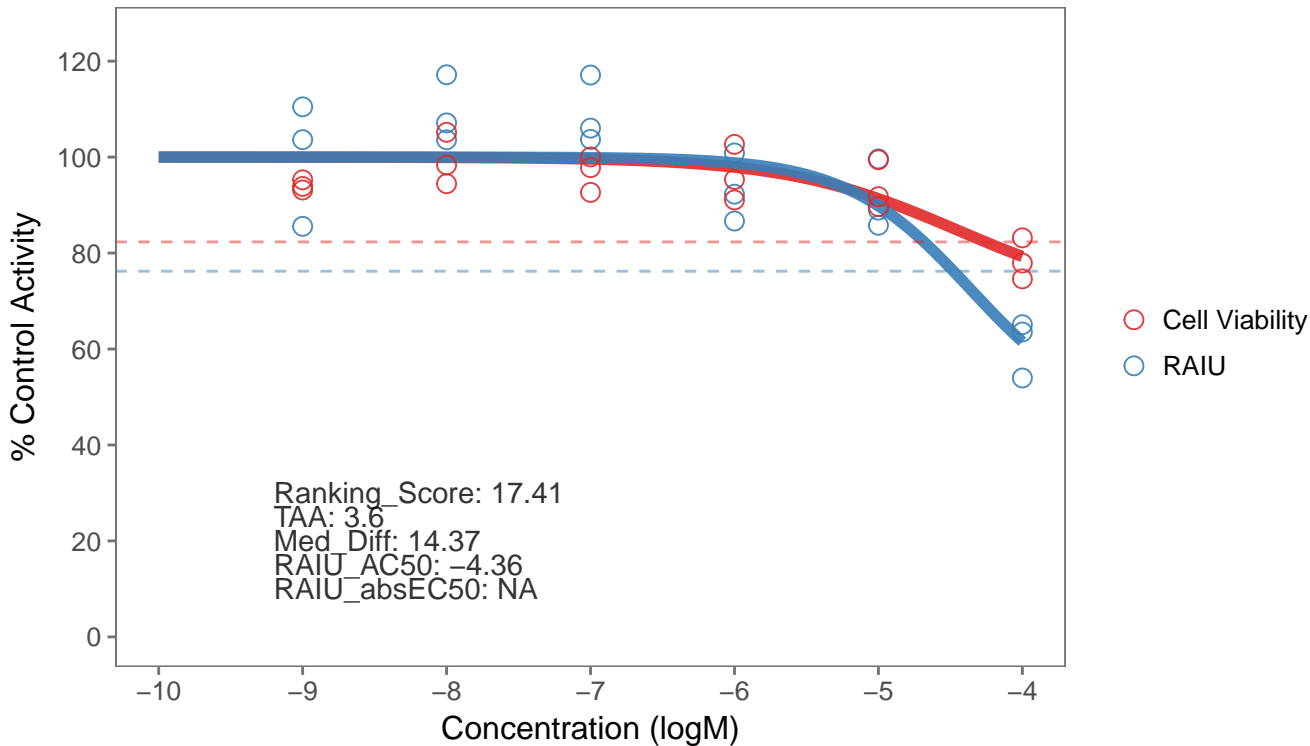

90. SPID: TP0001502F10

NAME: Fenarimol

CAS NO: 60168-88-9

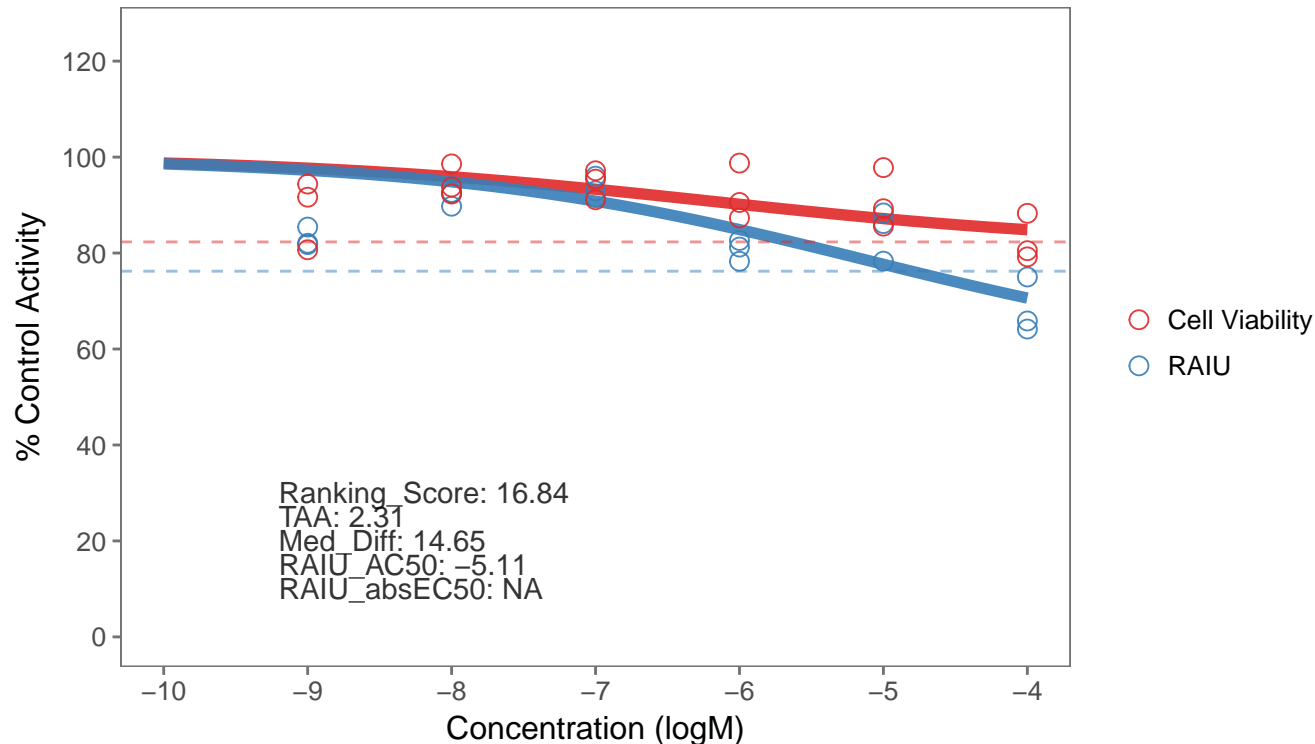

91. SPID: TP0001499B11

NAME: Allethrin

CAS NO: 584-79-2

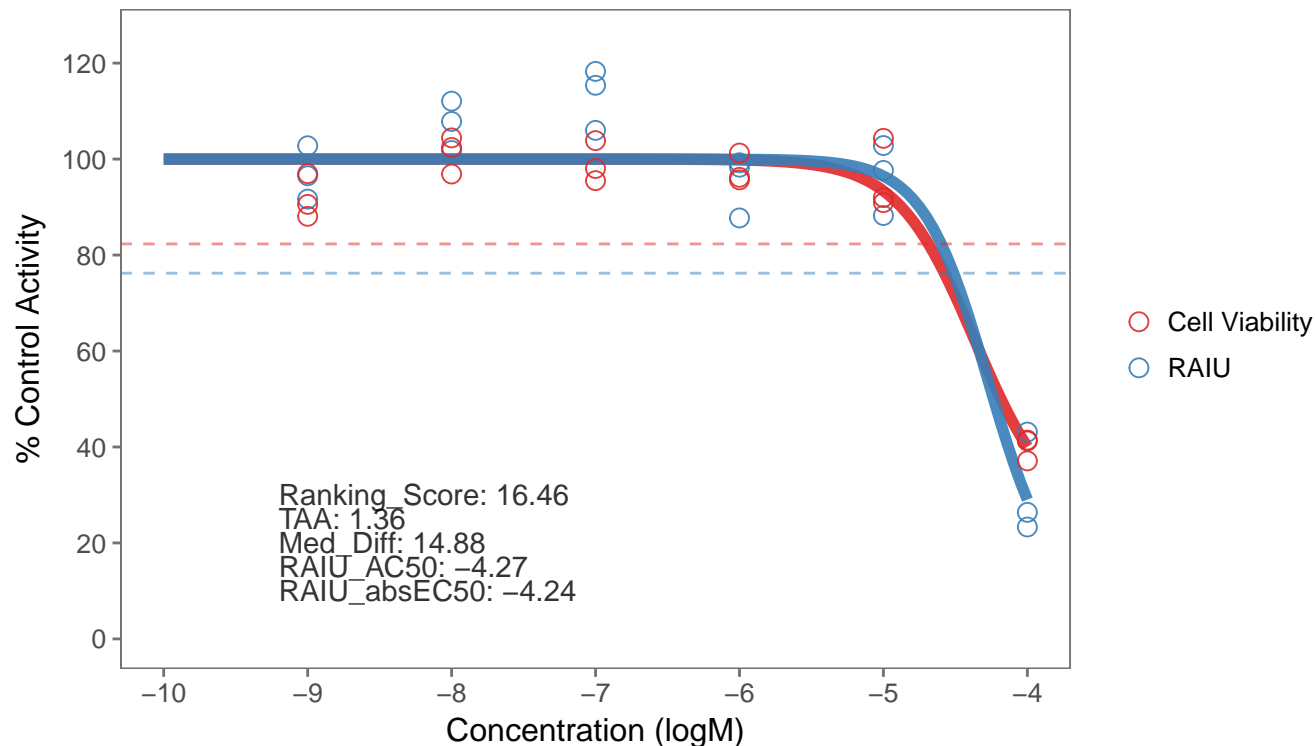



92. SPID: TP0001498E08

NAME: Maneb

CAS NO: 12427-38-2

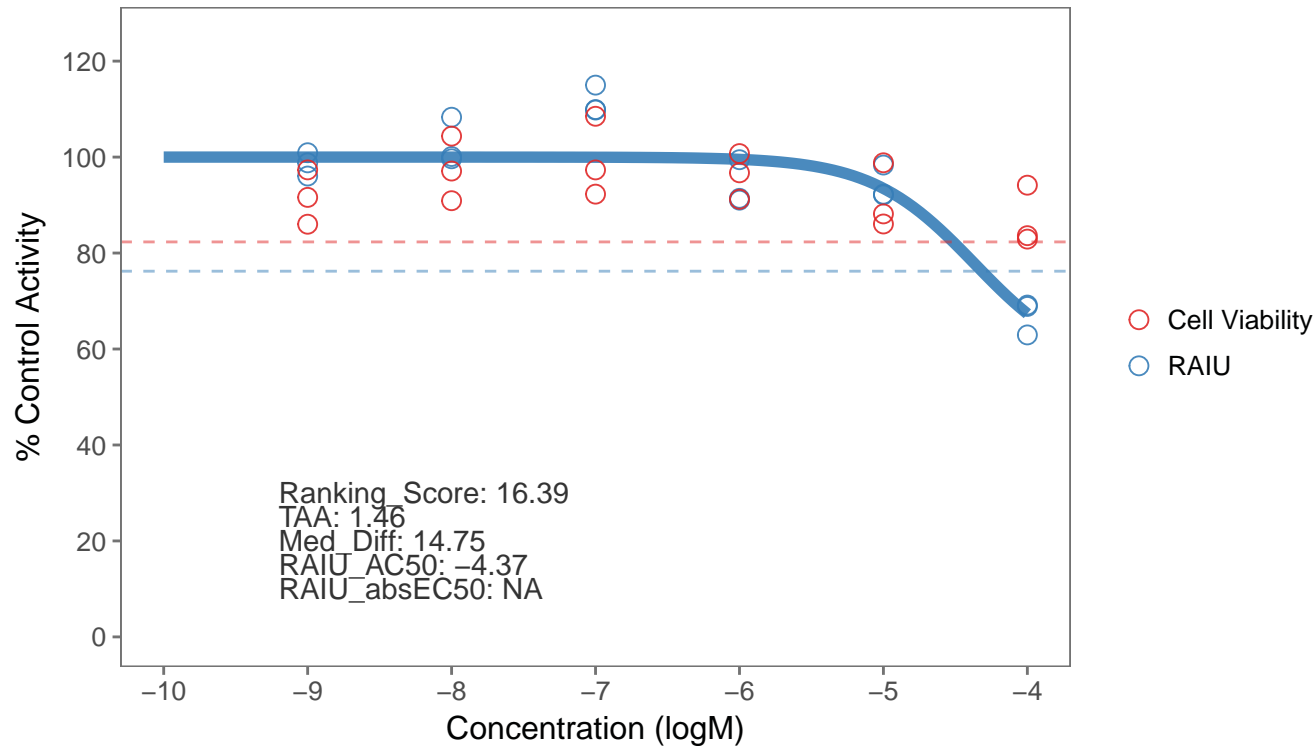

93. SPID: TP0001498D07

NAME: Flusilazole

CAS NO: 85509-19-9

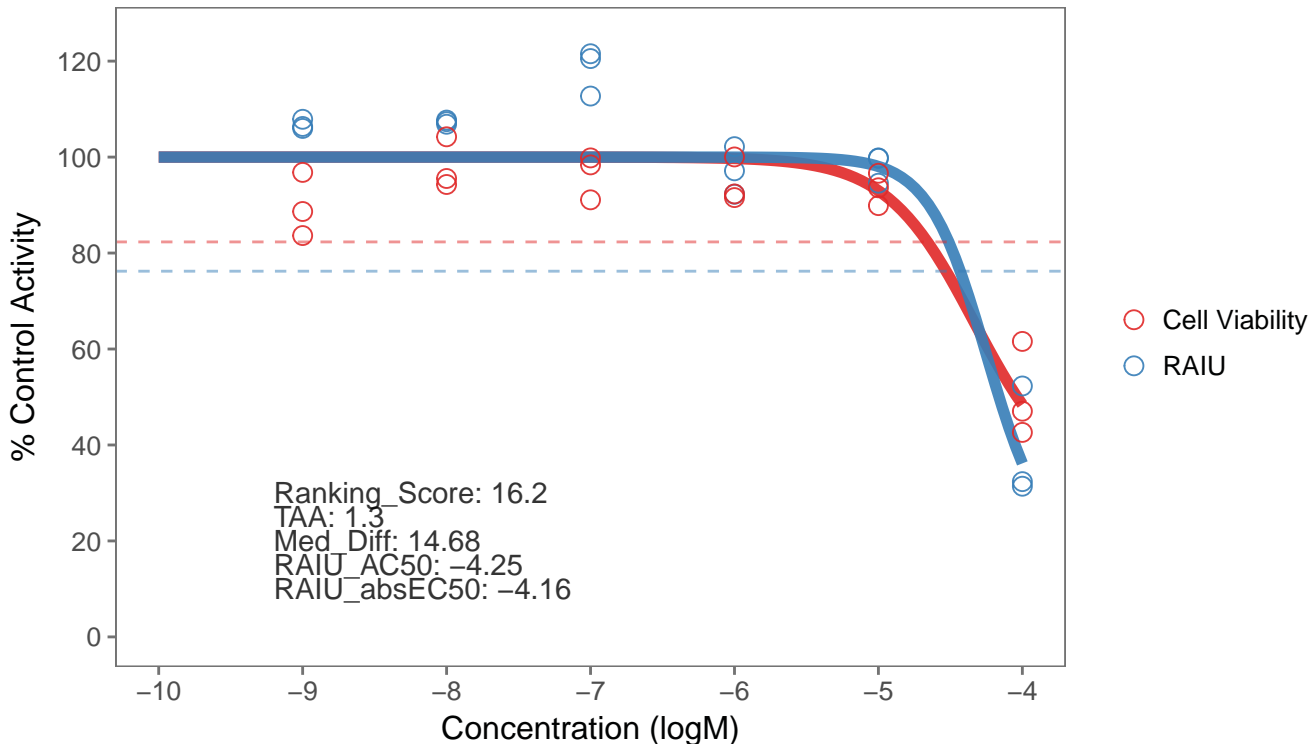

94. SPID: TP0001499B01  
NAME: Bisphenol A  
CAS NO: 80-05-7

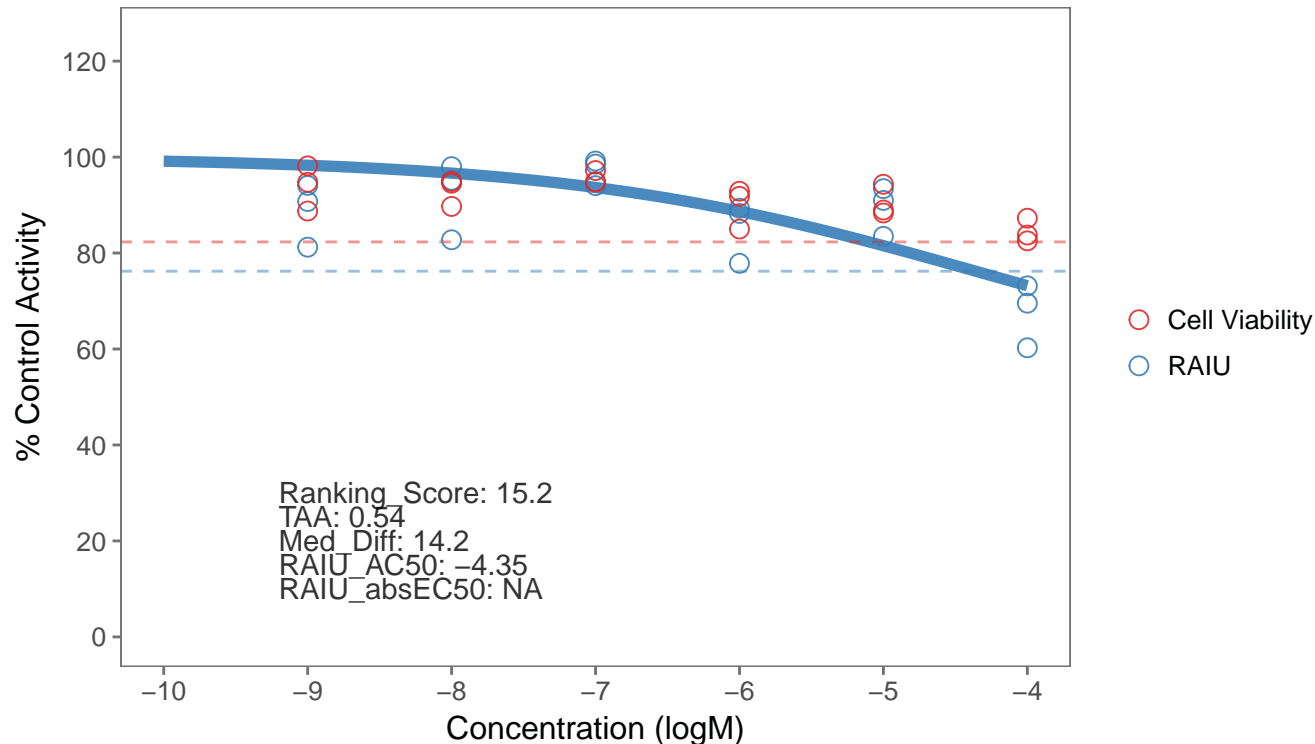

95. SPID: TP0001498G05

NAME: Ametryn

CAS NO: 834-12-8

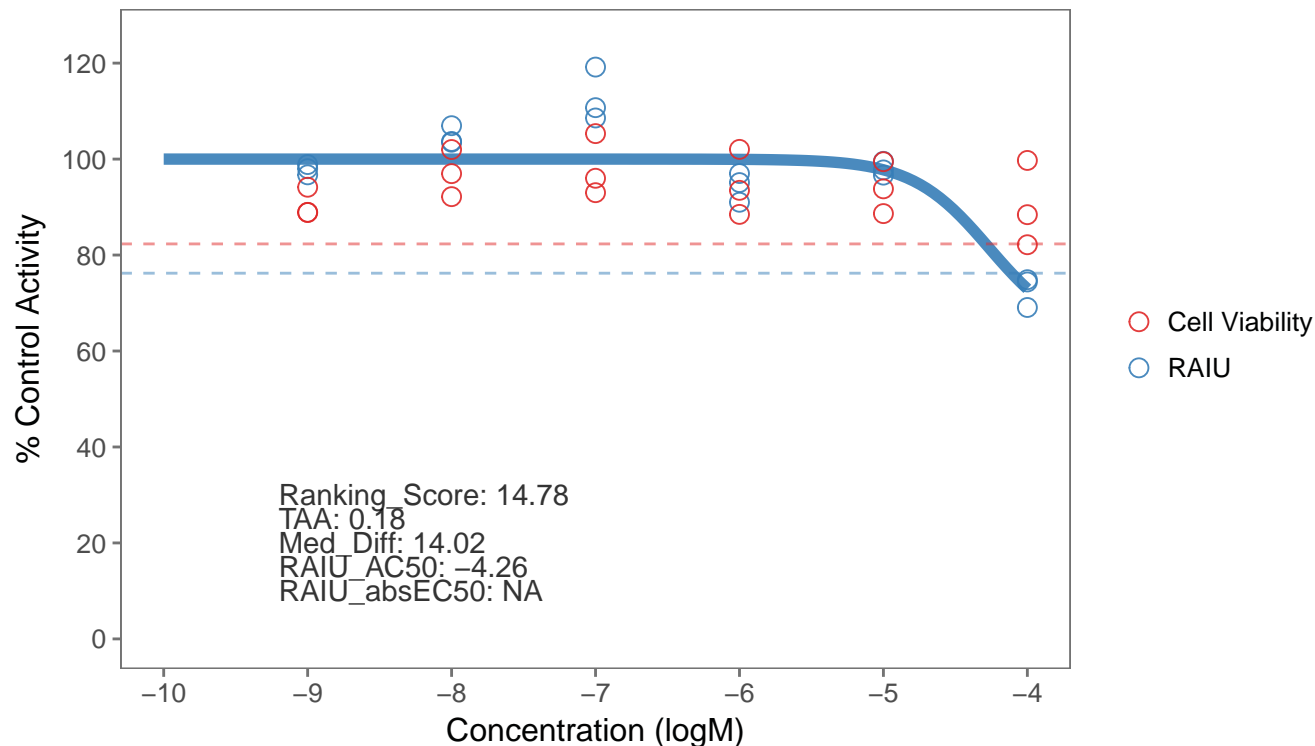

96. SPID: TP0001499G10  
NAME: Fluazifop-P-butyl  
CAS NO: 79241-46-6

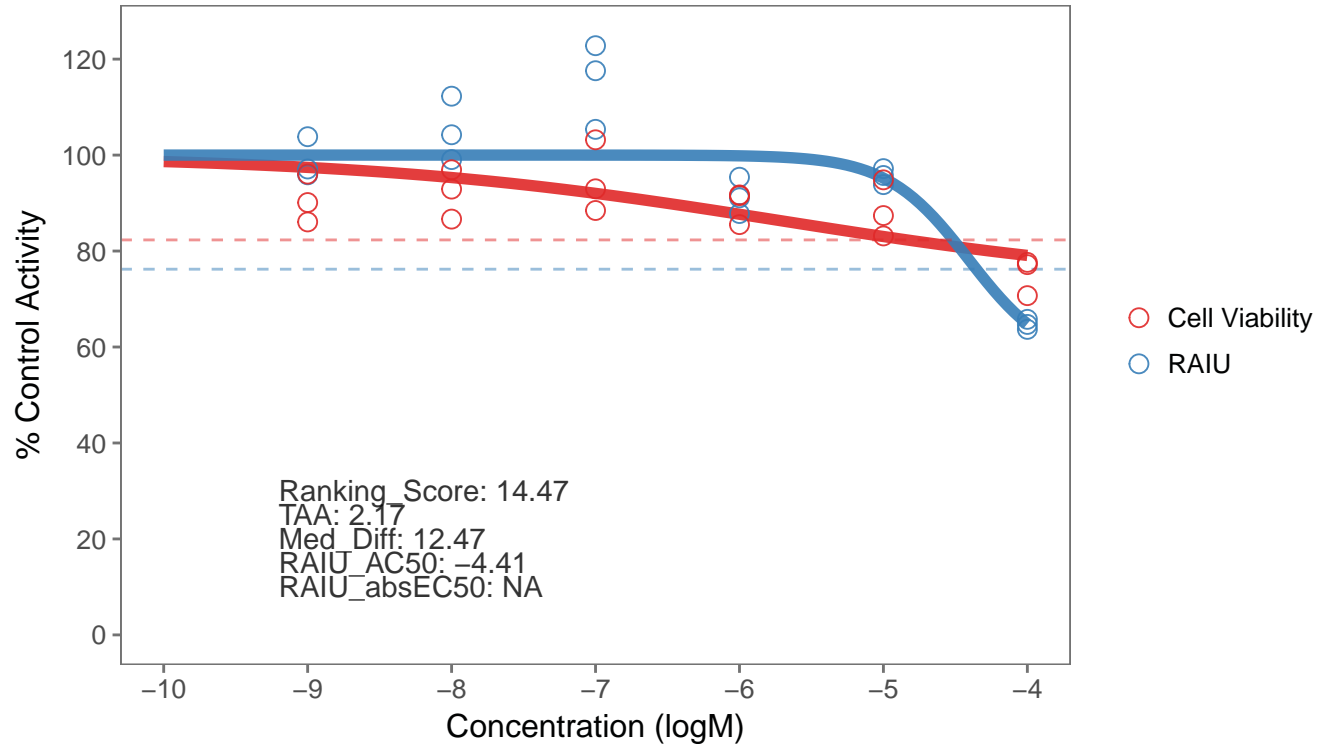

97. SPID: TP0001500E10

NAME: Diniconazole

CAS NO: 83657-24-3

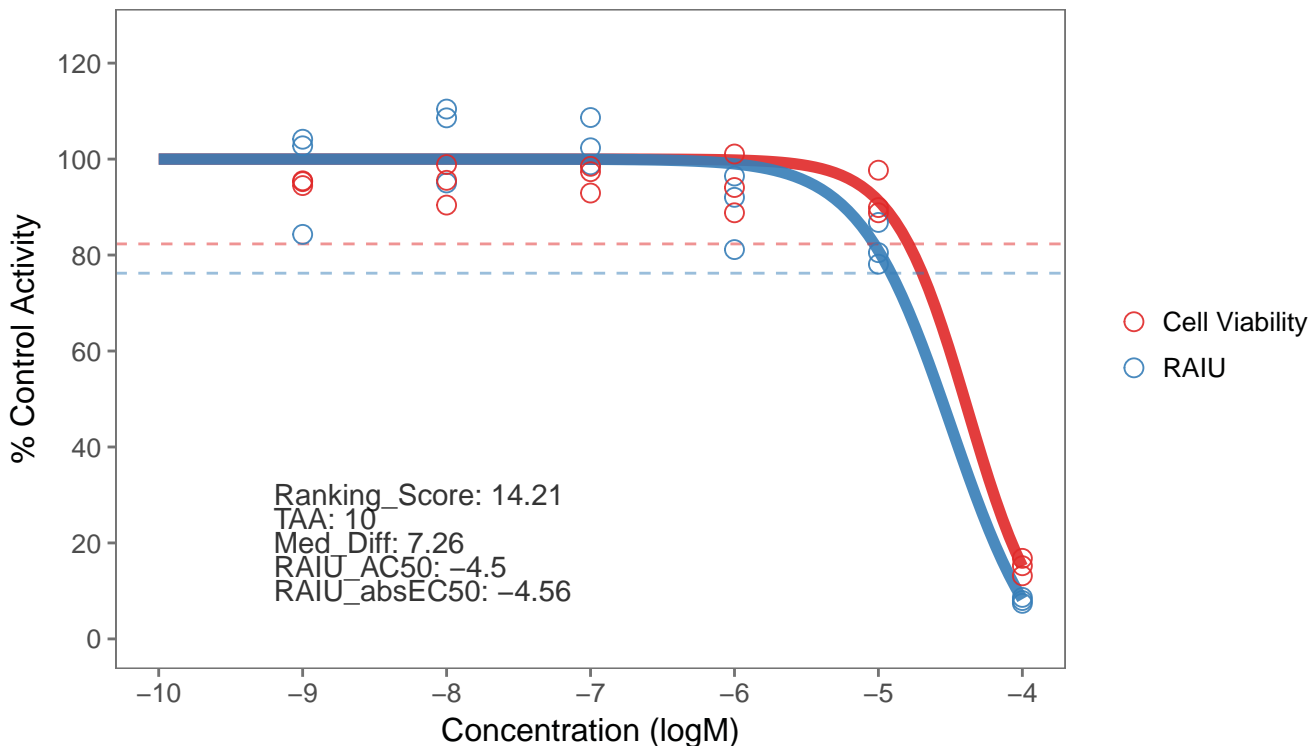

98. SPID: TP0001501G09  
NAME: Pendimethalin  
CAS NO: 40487-42-1

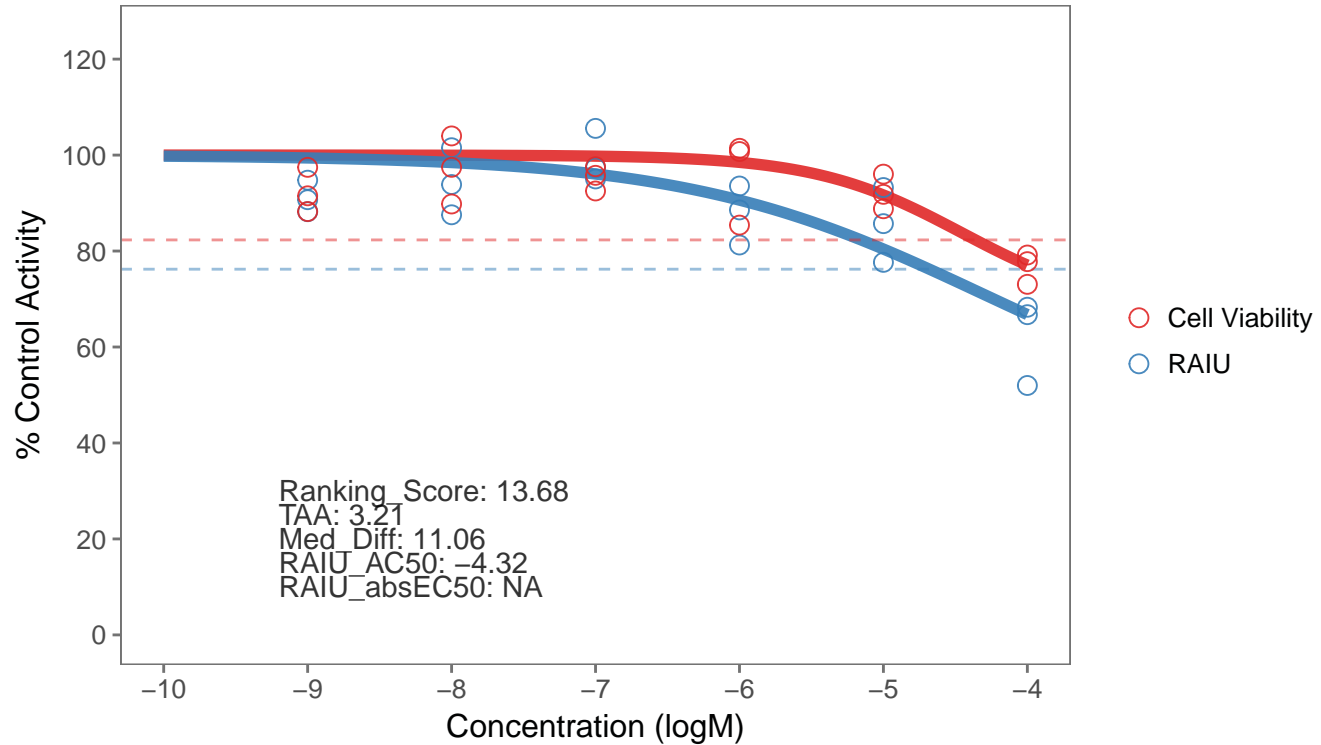

99. SPID: TP0001501F07  
NAME: Fenitrothion  
CAS NO: 122-14-5

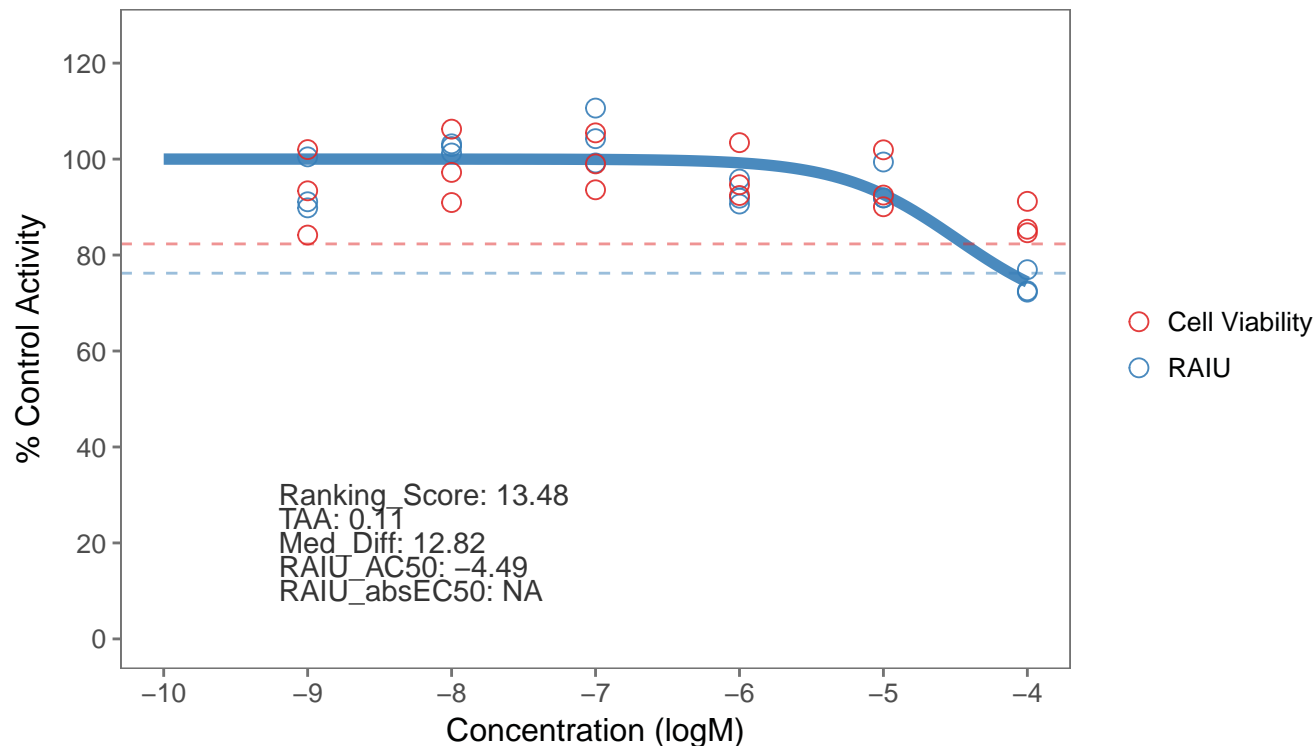



100. SPID: TP0001502B04

NAME: Isazofos

CAS NO: 42509-80-8

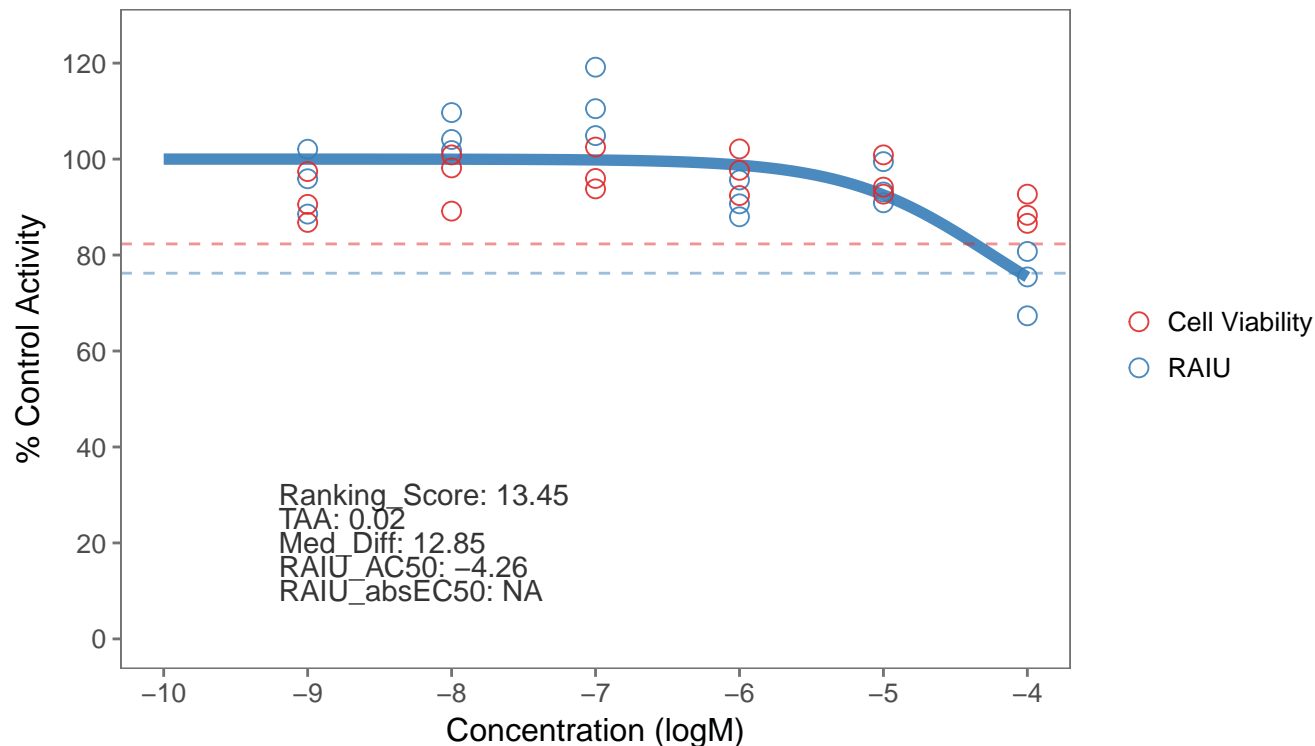

101. SPID: TP0001502B01

NAME: Oxadiazon

CAS NO: 19666-30-9

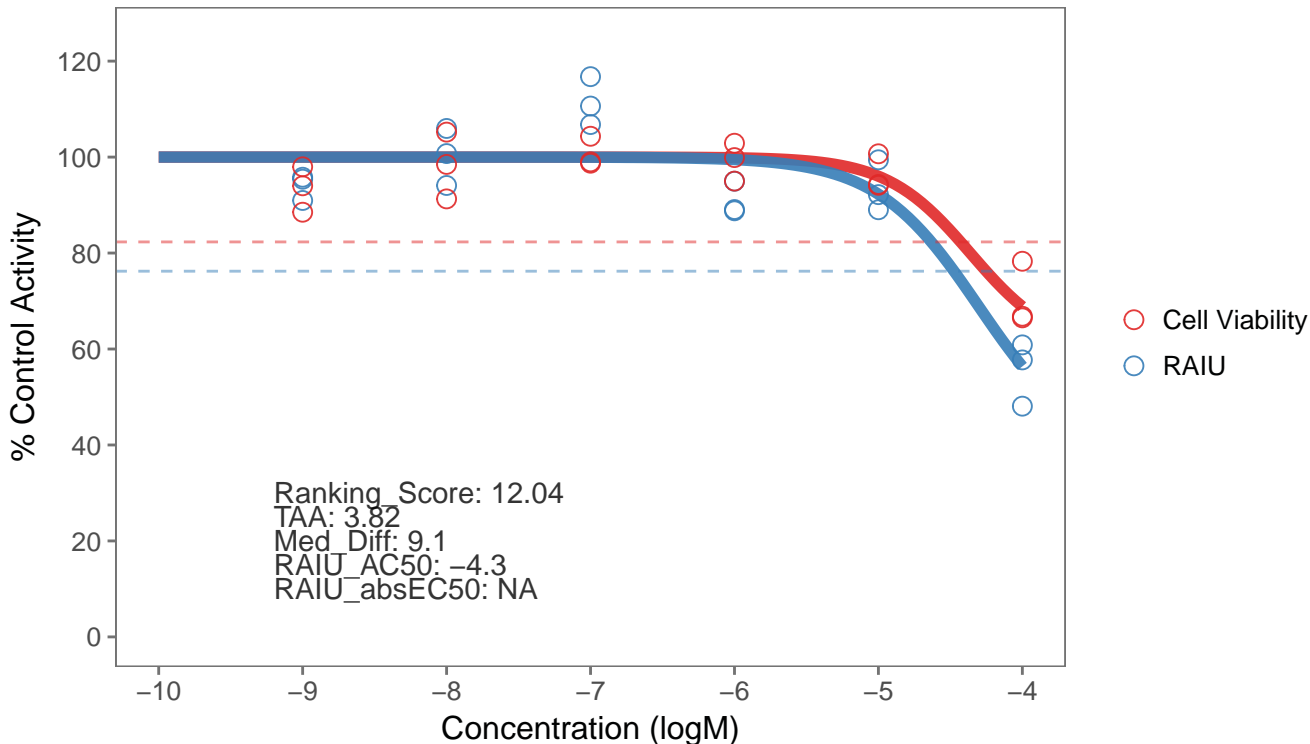

102. SPID: TP0001498D11

NAME: Hexythiazox

CAS NO: 78587-05-0

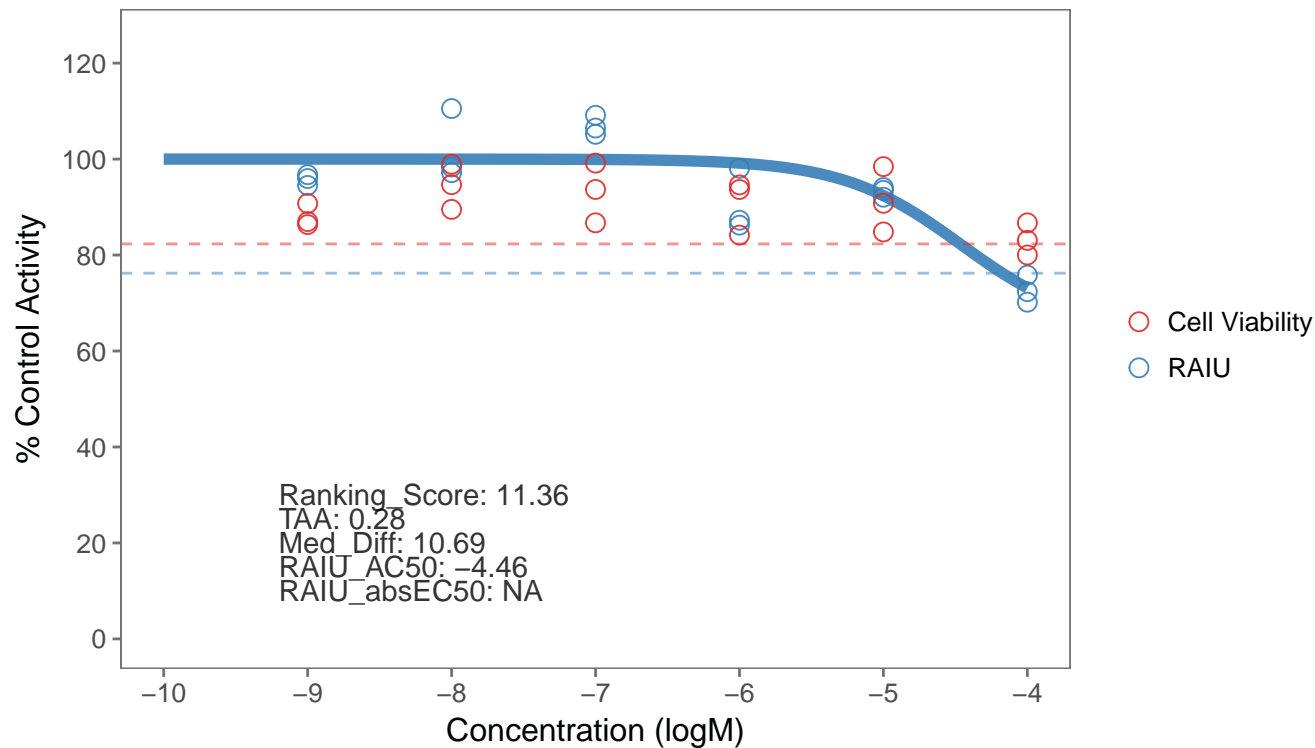

103. SPID: TP0001500E09

NAME: Fenamidone

CAS NO: 161326-34-7

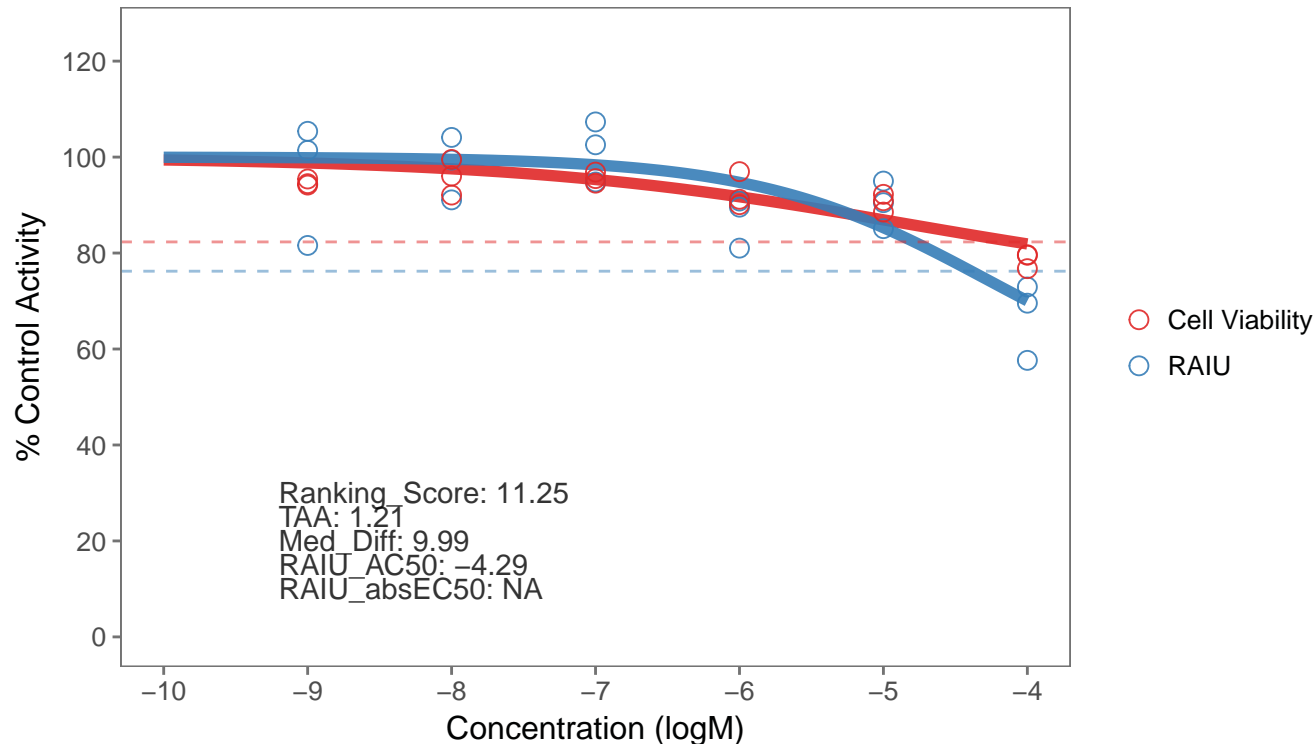

104. SPID: TP0001498F05

NAME: Difenoconazole

CAS NO: 119446-68-3

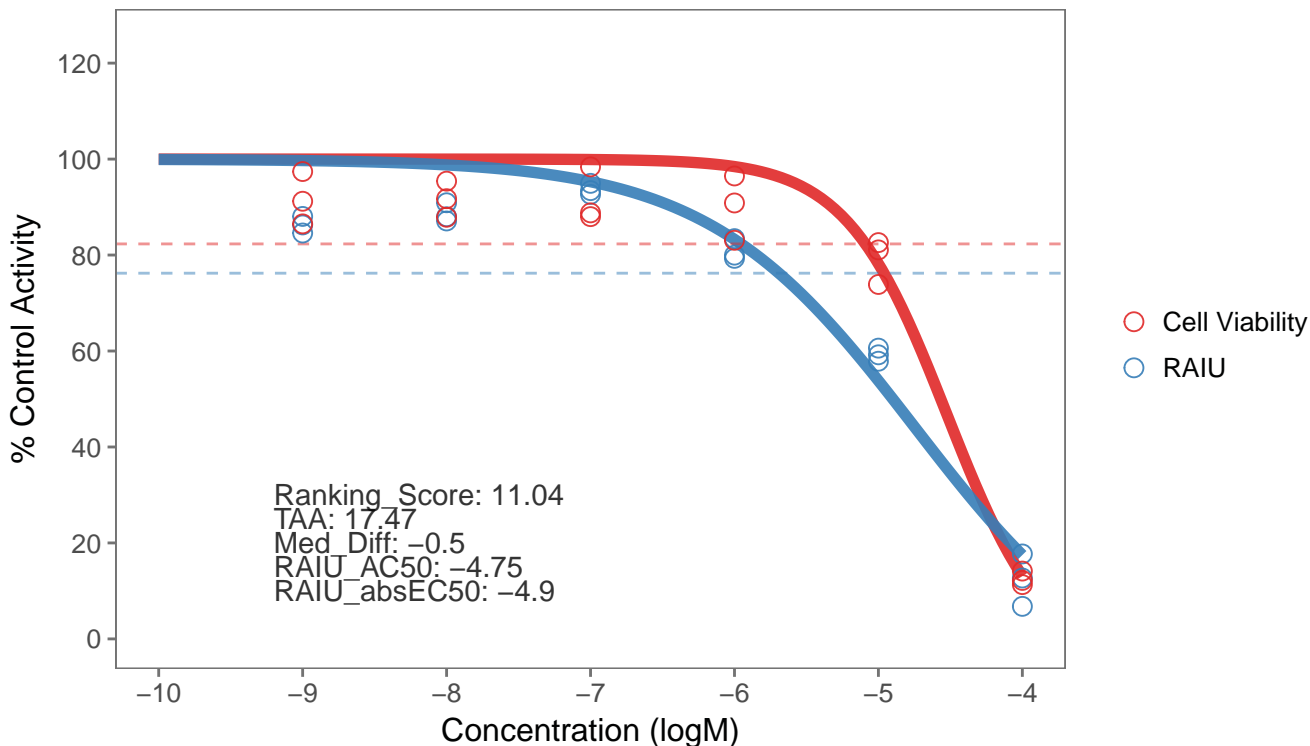

105. SPID: TP0001501F01  
NAME: Azoxystrobin  
CAS NO: 131860-33-8

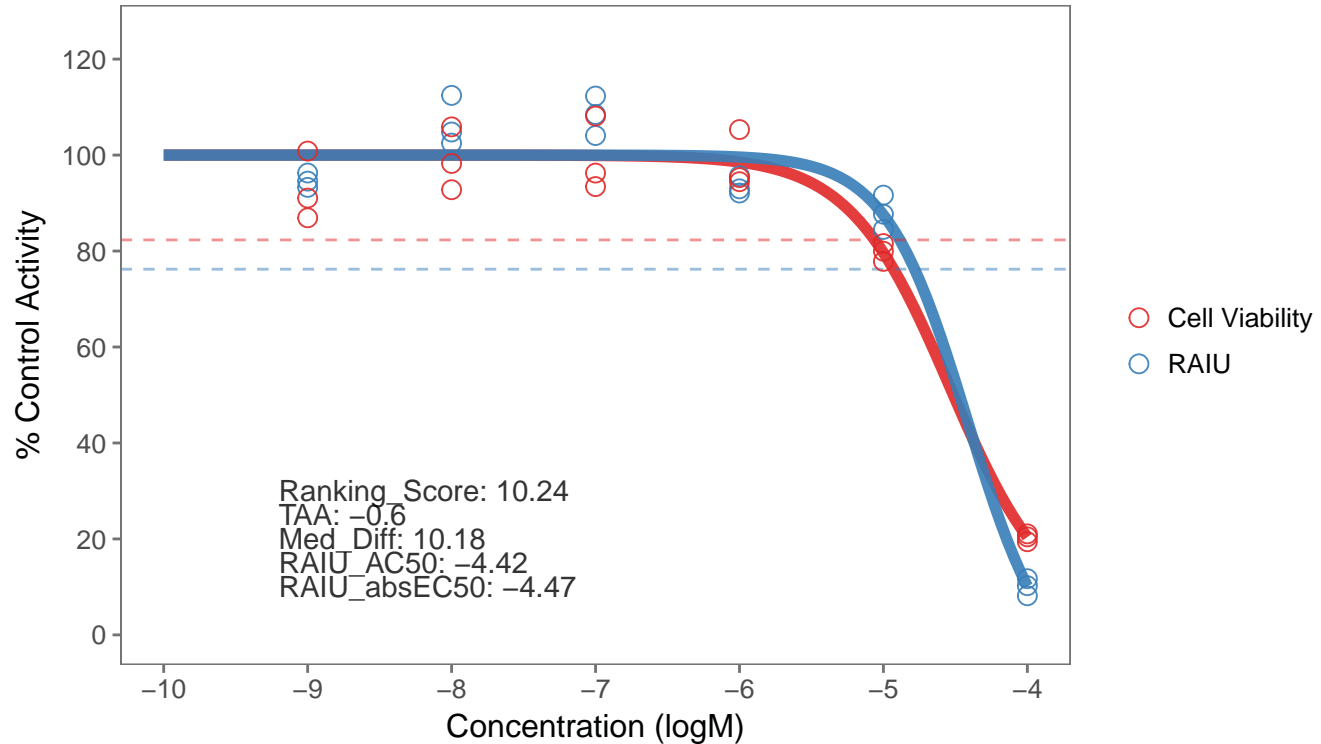

106. SPID: TP0001502C04  
NAME: Fluthiacet-methyl  
CAS NO: 117337-19-6

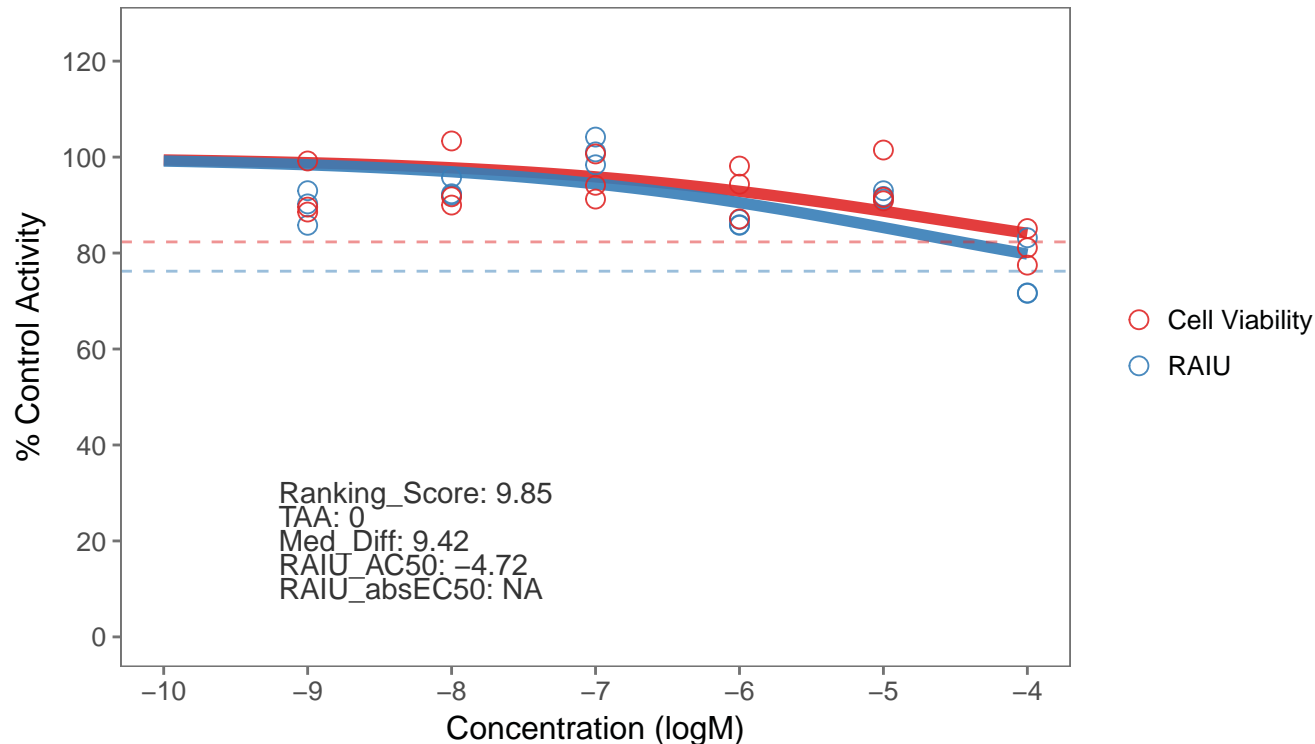

107. SPID: TP0001498E01

NAME: Oryzalin

CAS NO: 19044-88-3

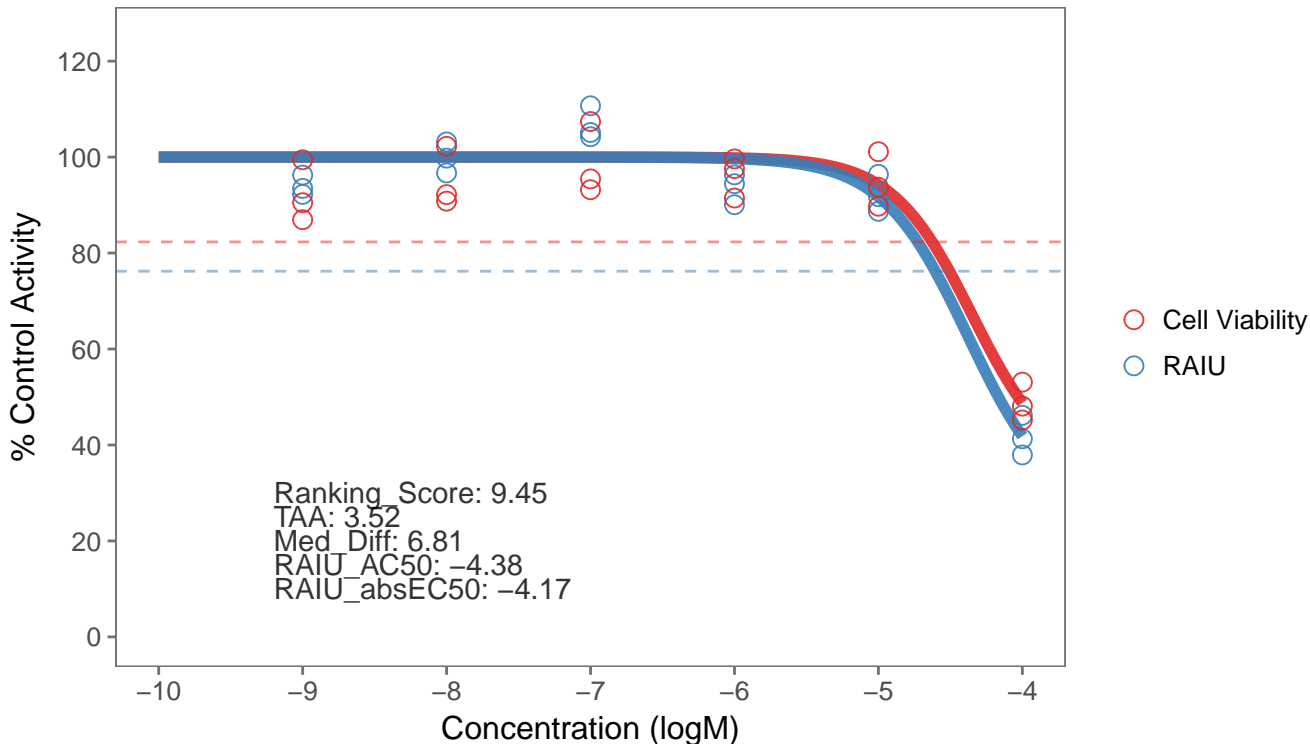



108. SPID: TP0001501E05

NAME: Thidiazuron

CAS NO: 51707-55-2

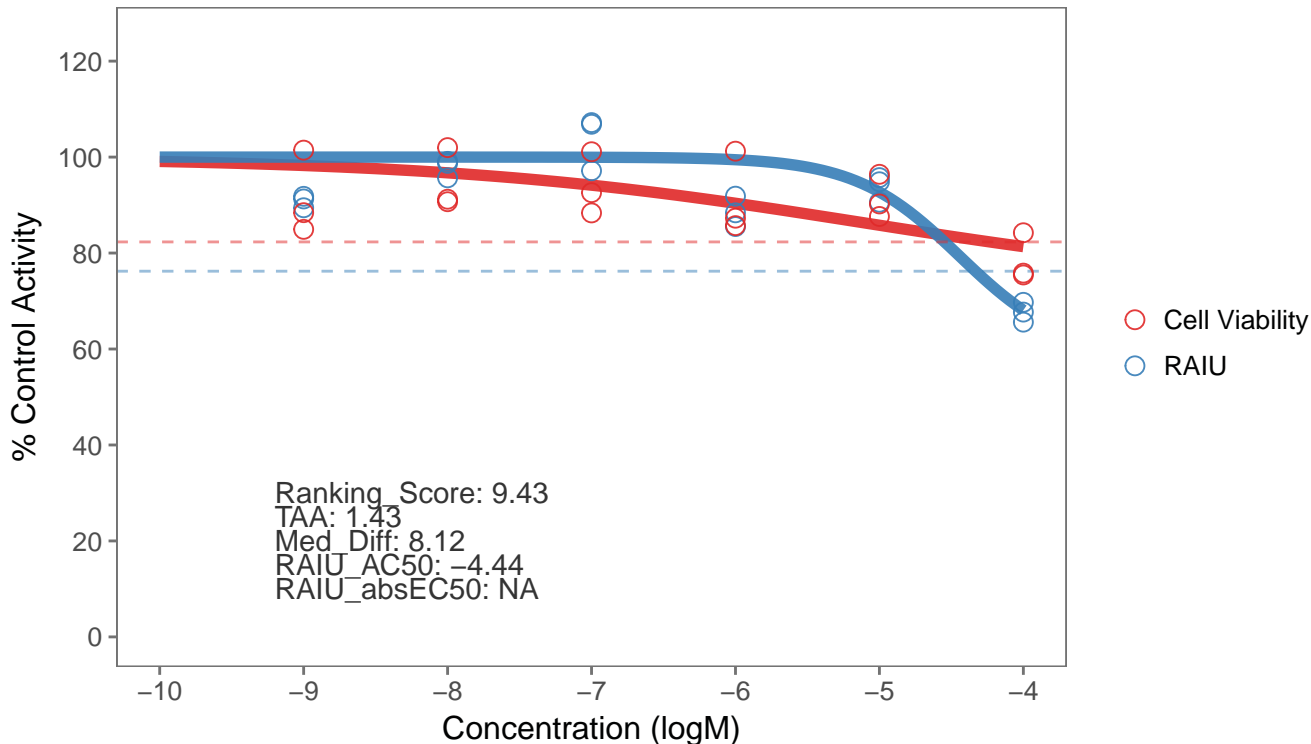

109. SPID: TP0001500B05  
NAME: Famoxadone  
CAS NO: 131807-57-3

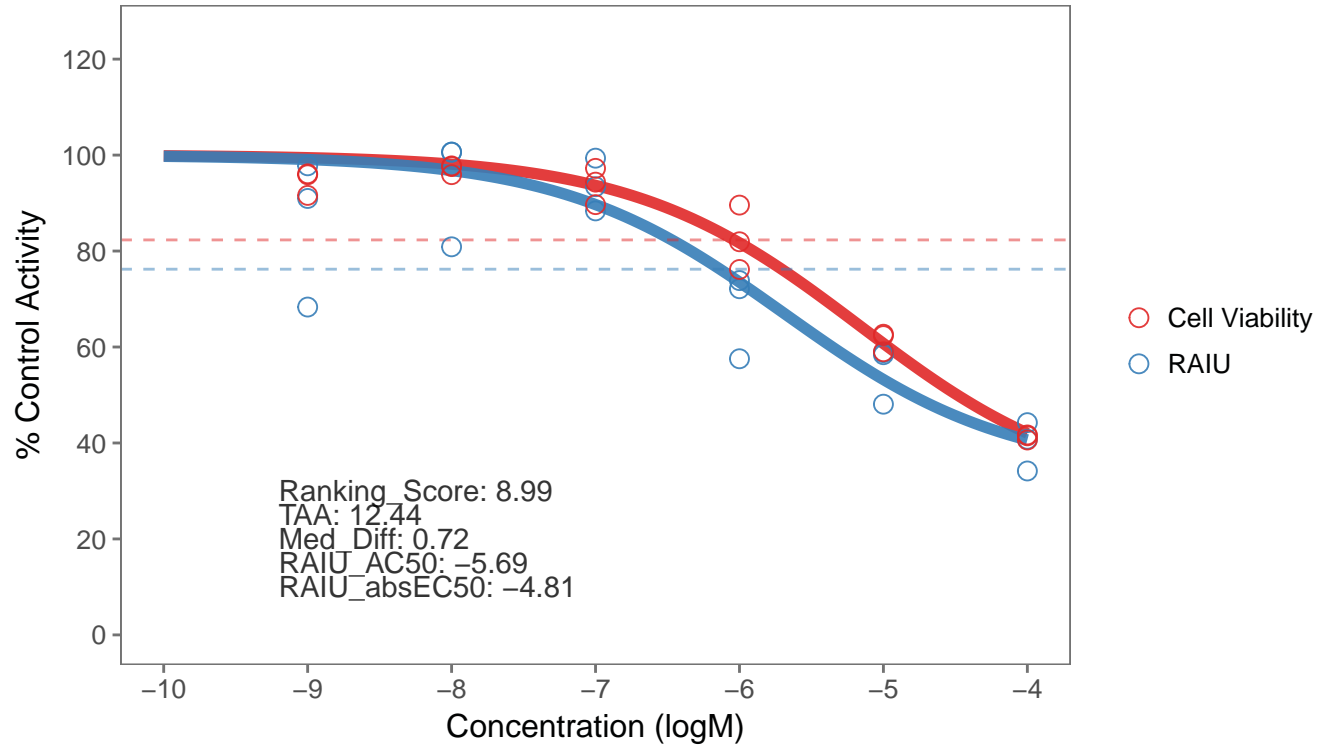

110. SPID: TP0001502E04

NAME: Dicofol

CAS NO: 115-32-2

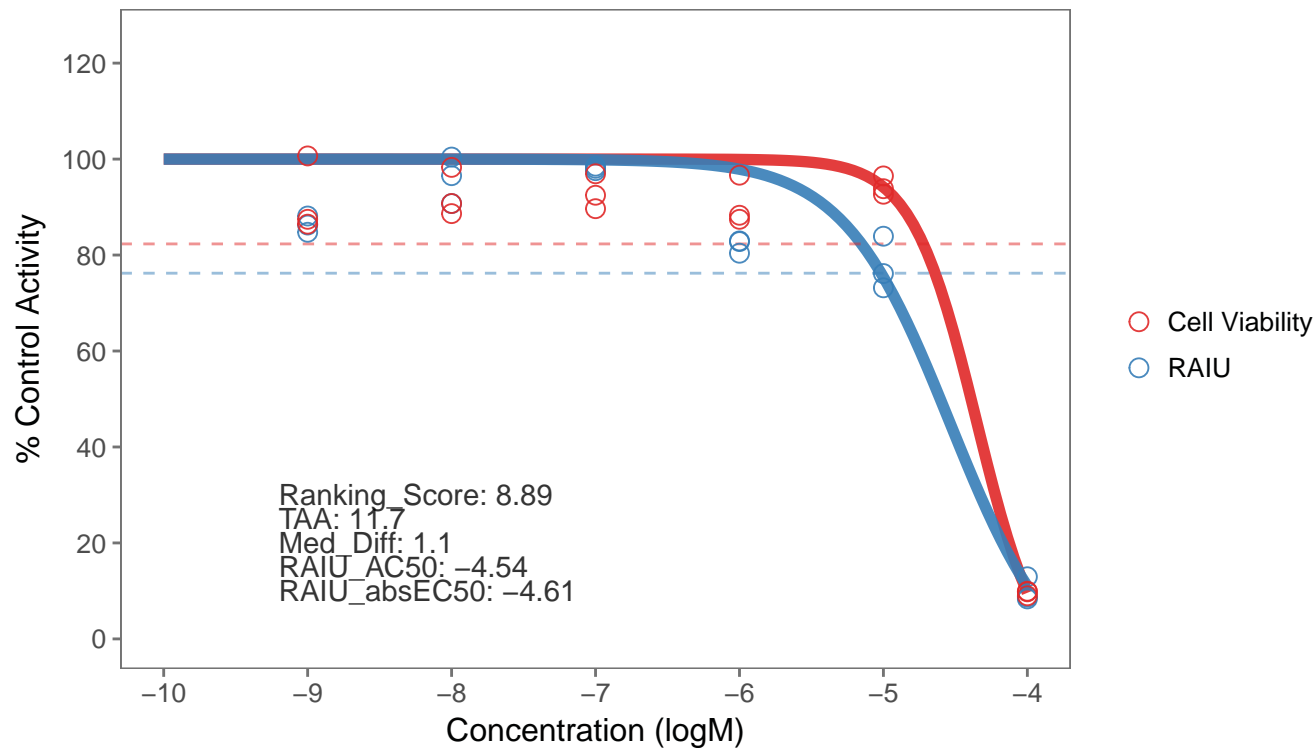

111. SPID: TP0001500F02

NAME: Propargite

CAS NO: 2312-35-8

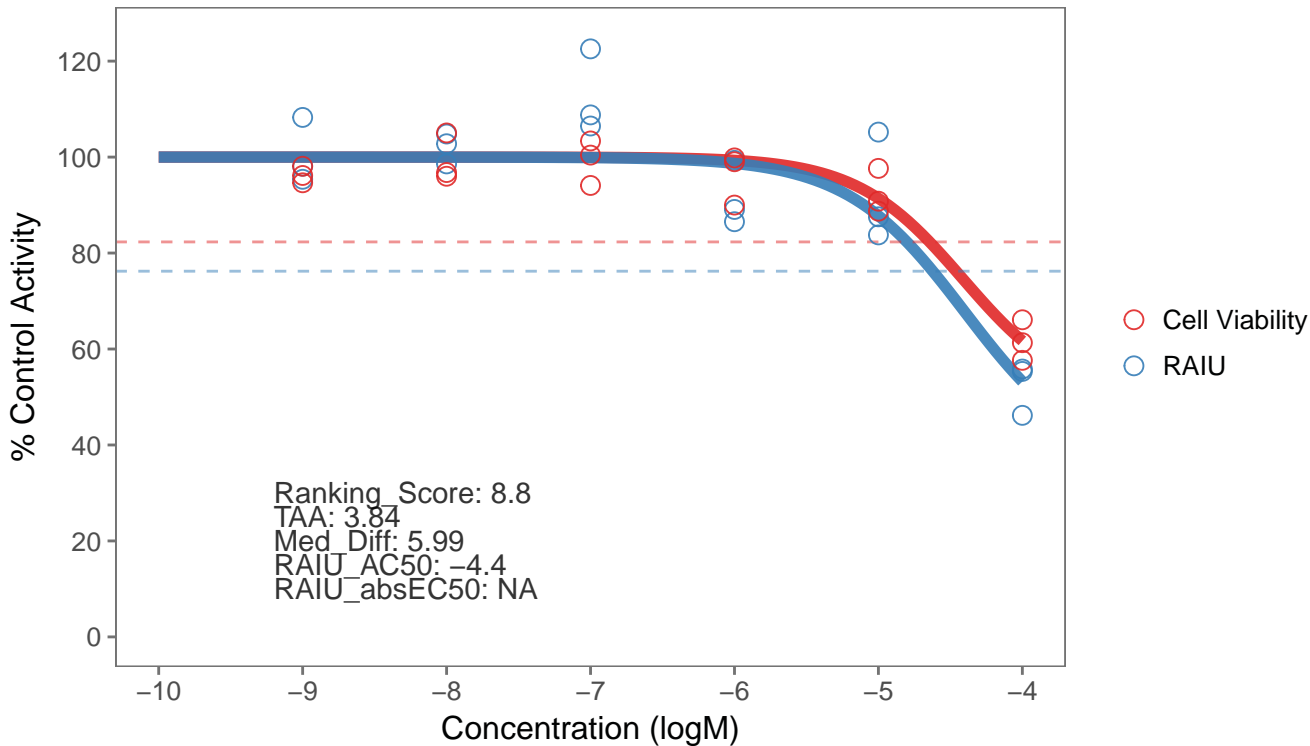

112. SPID: TP0001501E02

NAME: 2,2-Bis(4-hydroxyphenyl)-1,1,1-trichloroethane

CAS NO: 2971-36-0

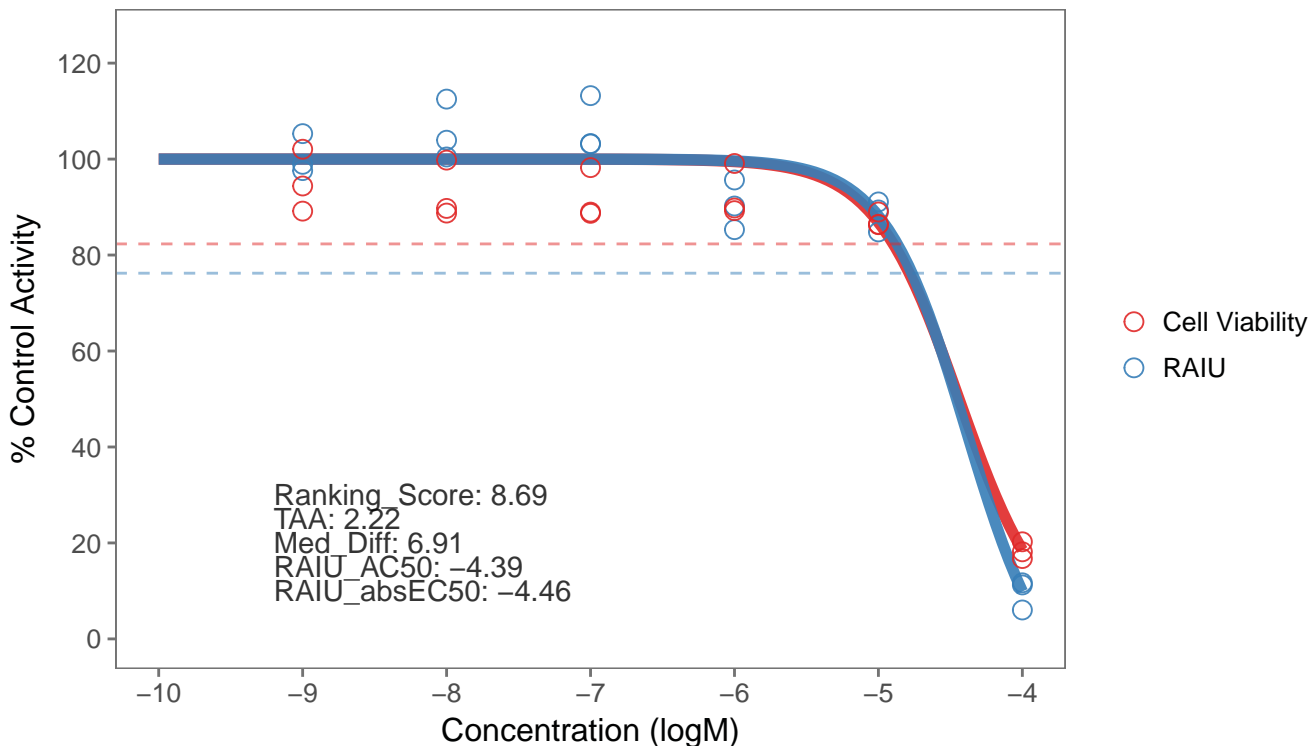

113. SPID: TP0001502G09

NAME: Propiconazole

CAS NO: 60207-90-1

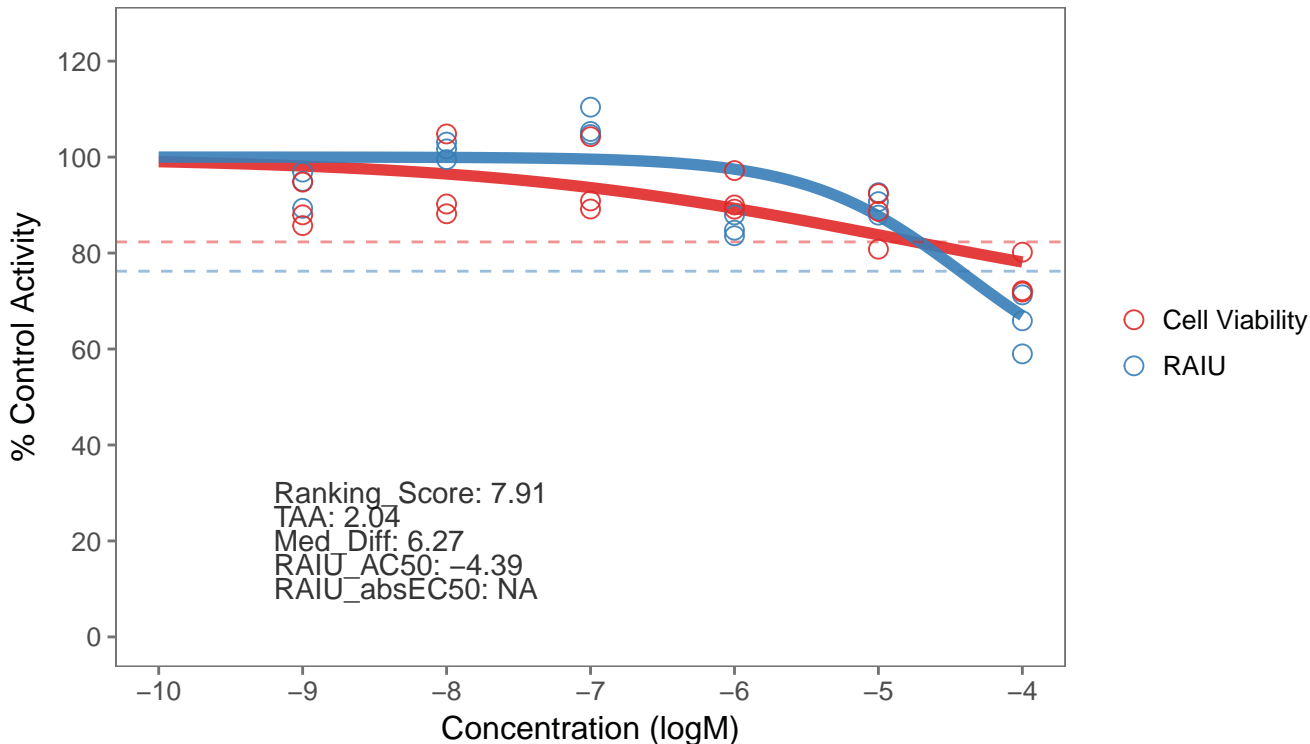

114. SPID: TP0001498E11

NAME: Chlorethoxyfos

CAS NO: 54593-83-8

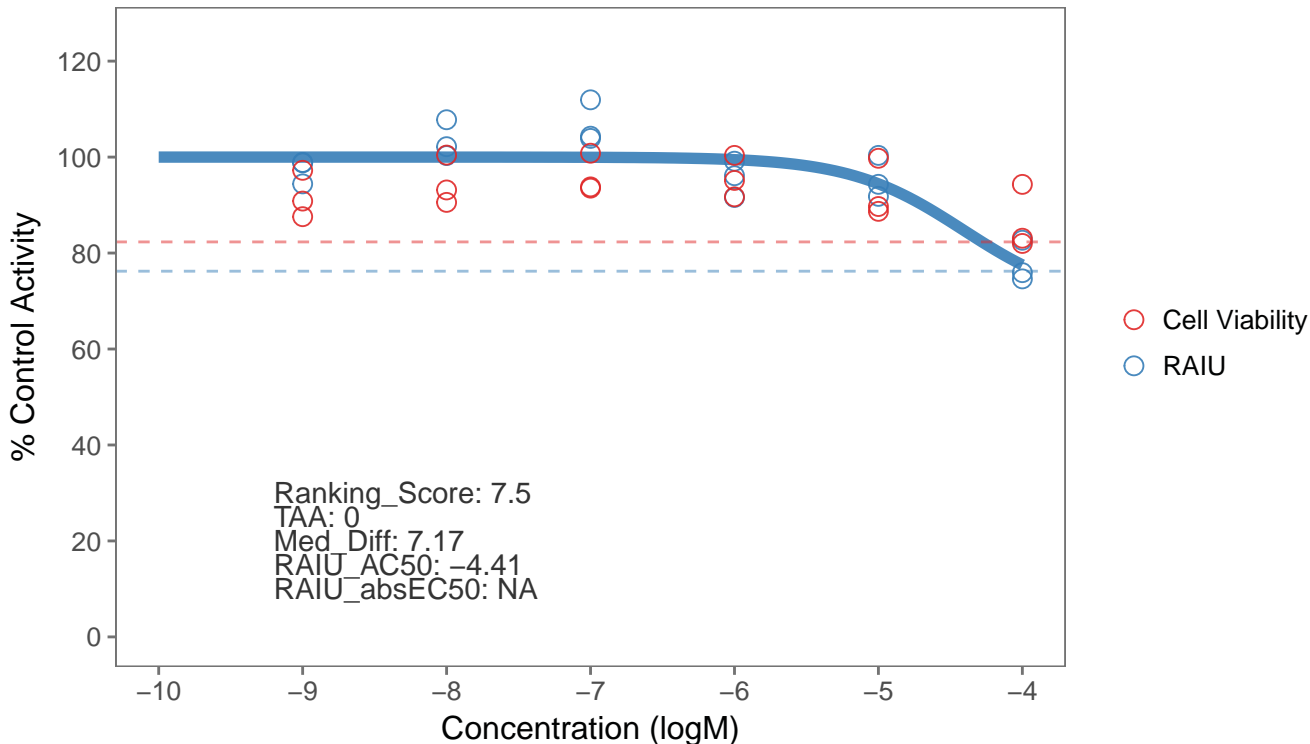

115. SPID: TP0001502G04  
NAME: Thiodicarb  
CAS NO: 59669-26-0

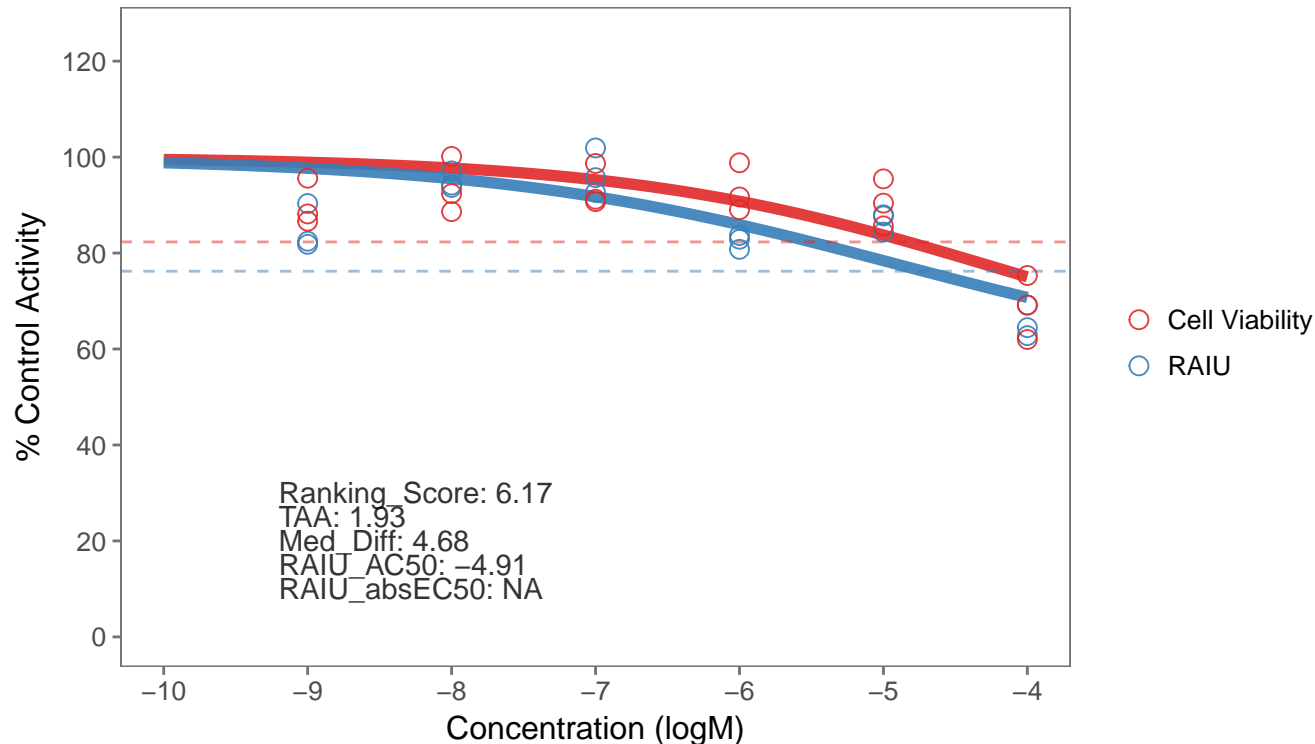



116. SPID: TP0001500D04  
NAME: Ethofumesate  
CAS NO: 26225-79-6

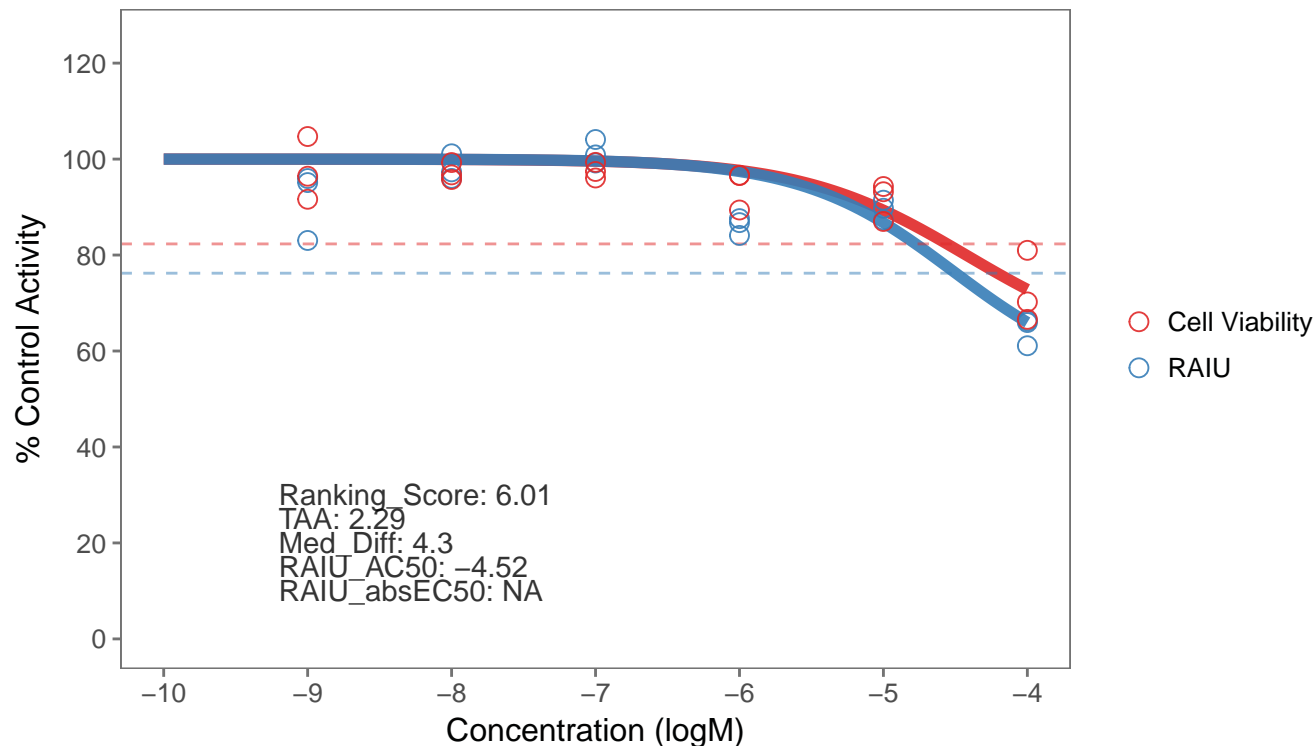

117. SPID: TP0001498F07

NAME: Bensulide

CAS NO: 741-58-2

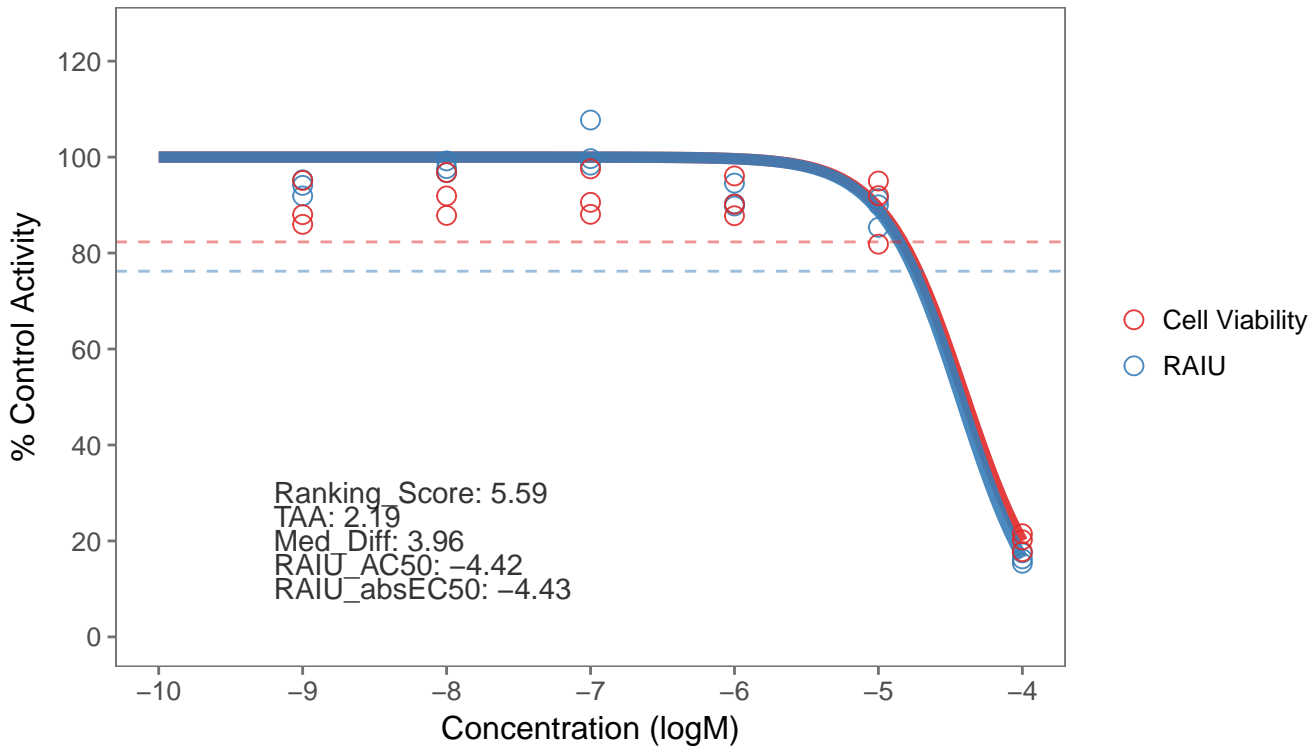

118. SPID: TP0001500G09

NAME: Prodiamine

CAS NO: 29091-21-2

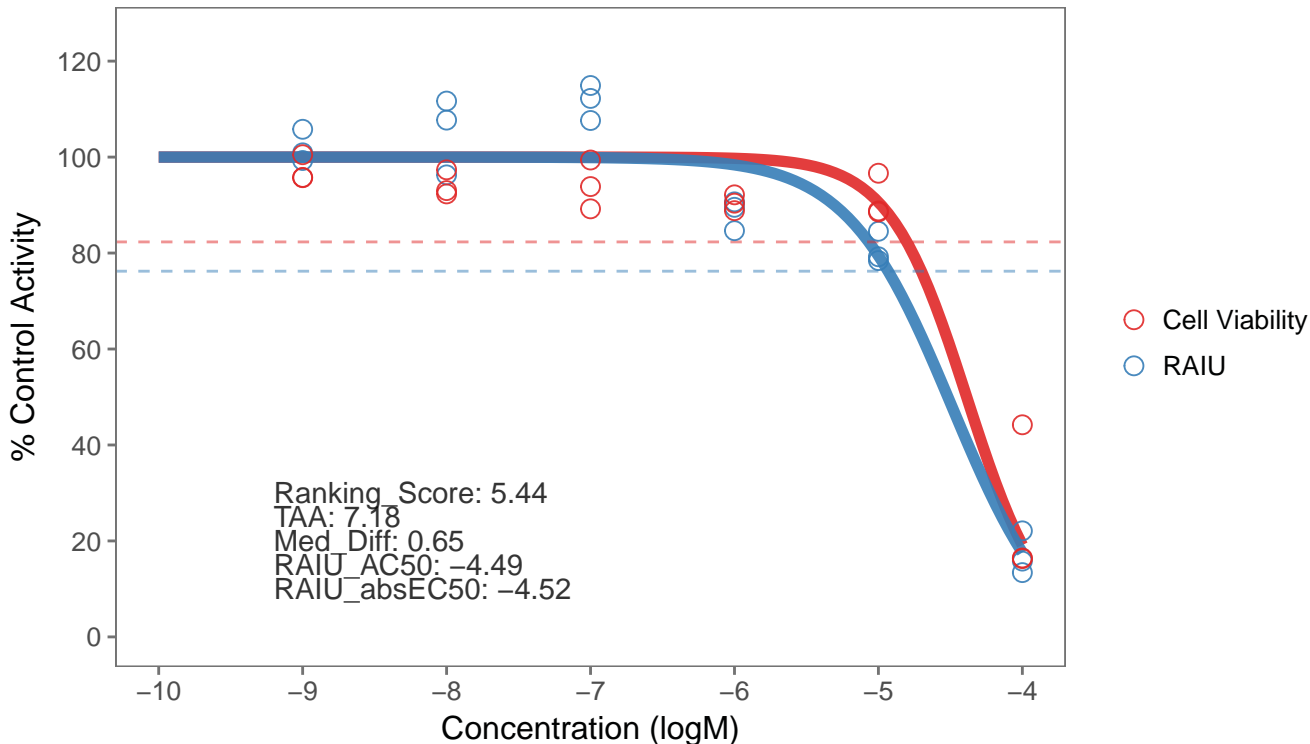

119. SPID: TP0001501D04

NAME: Bensulide

CAS NO: 741-58-2

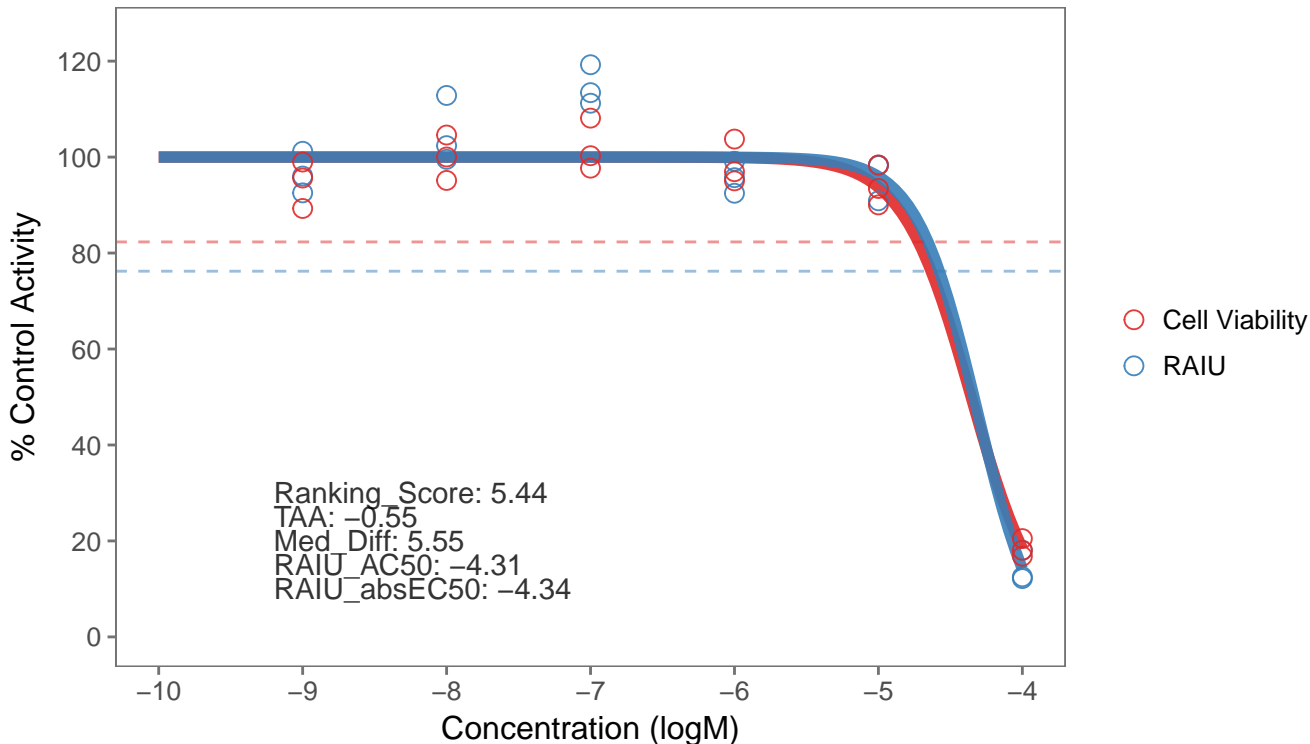

120. SPID: TP0001500C04  
NAME: Bisphenol A  
CAS NO: 80-05-7

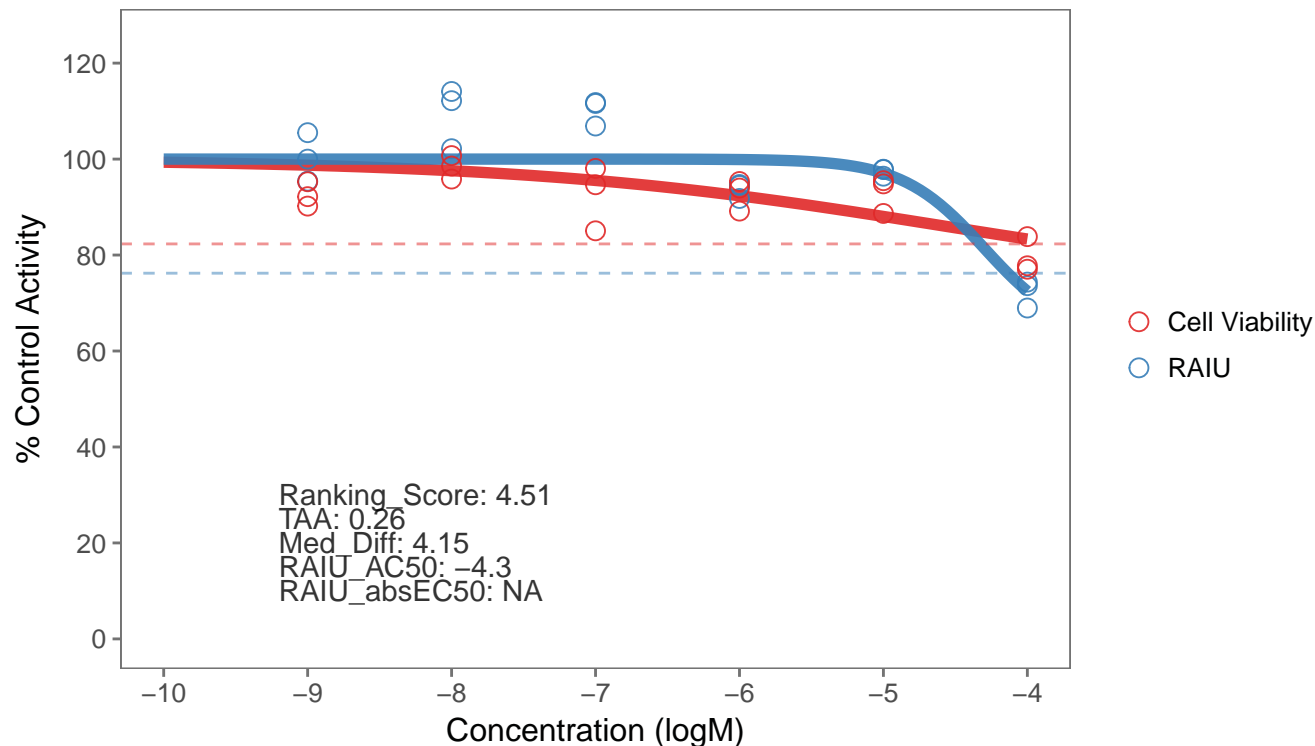

121. SPID: TP0001500G05  
NAME: Flumioxazin  
CAS NO: 103361-09-7

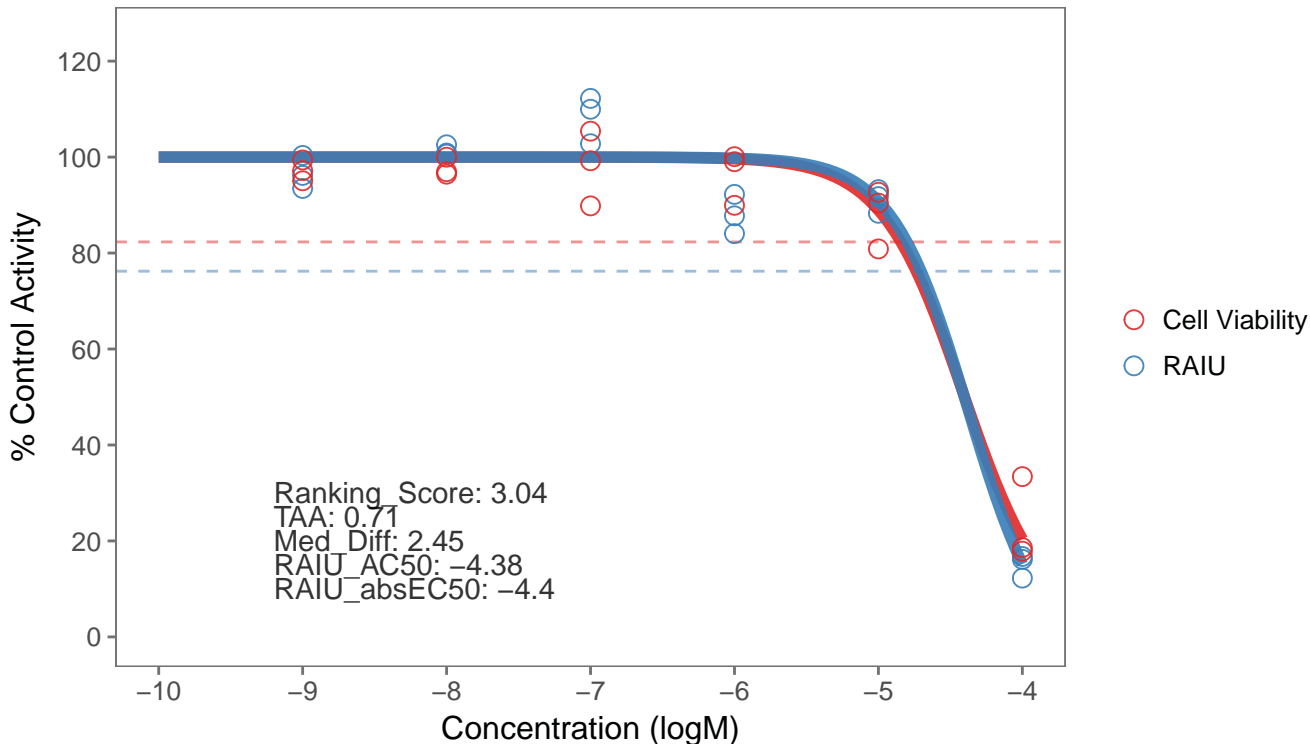

122. SPID: TP0001502A01

NAME: Methidathion

CAS NO: 950-37-8

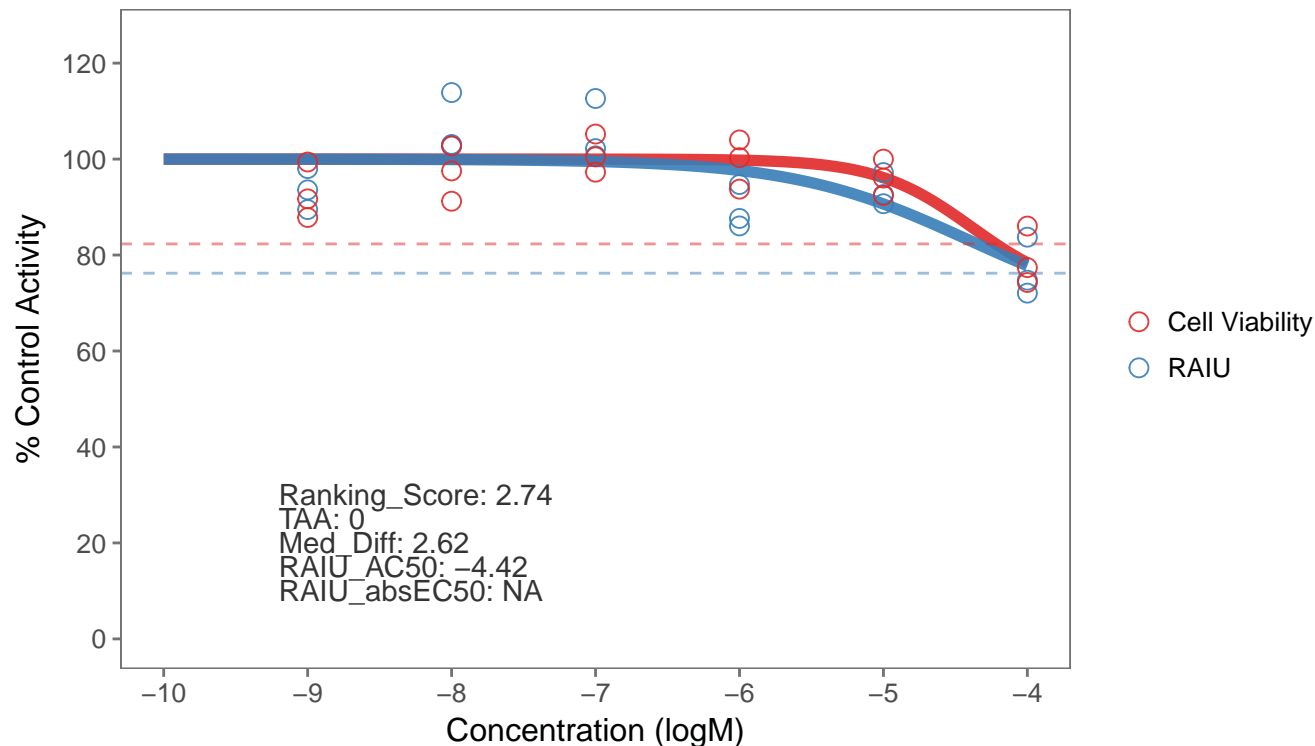

123. SPID: TP0001498B05

NAME: Azoxystrobin

CAS NO: 131860-33-8

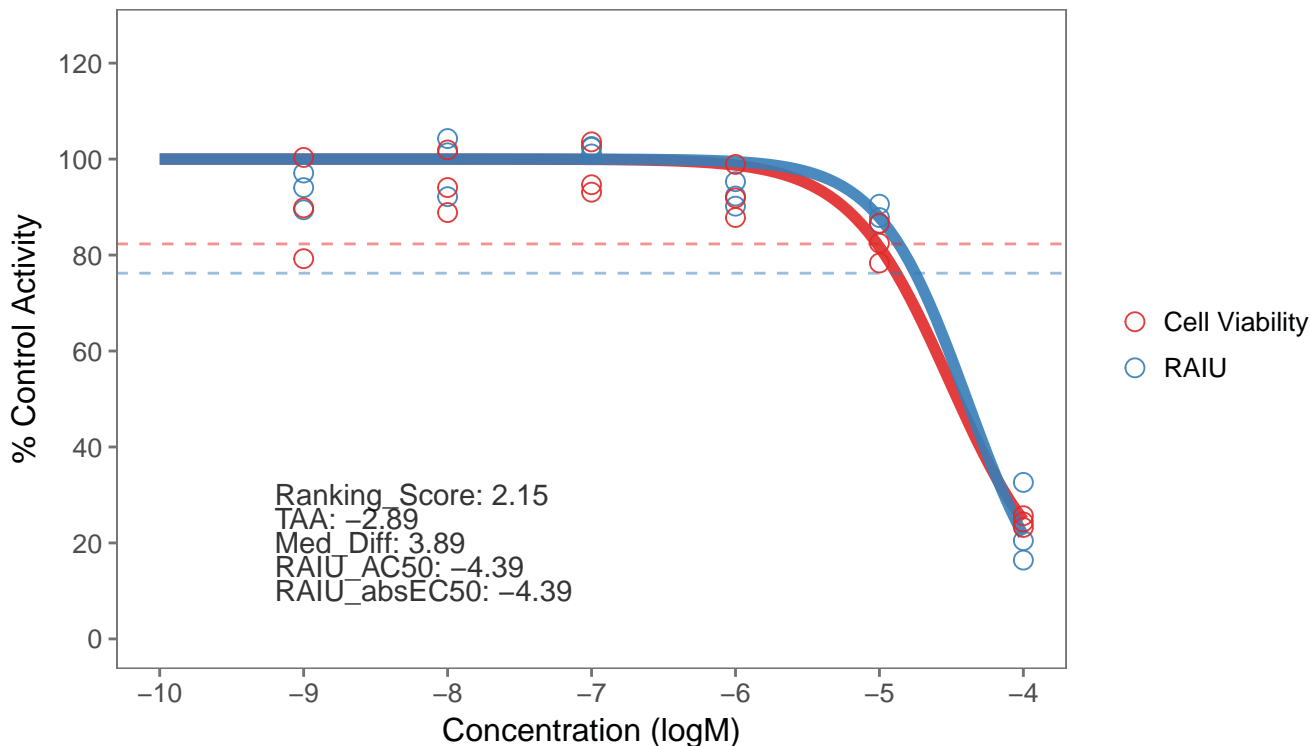



124. SPID: TP0001498B09

NAME: Butralin

CAS NO: 33629-47-9

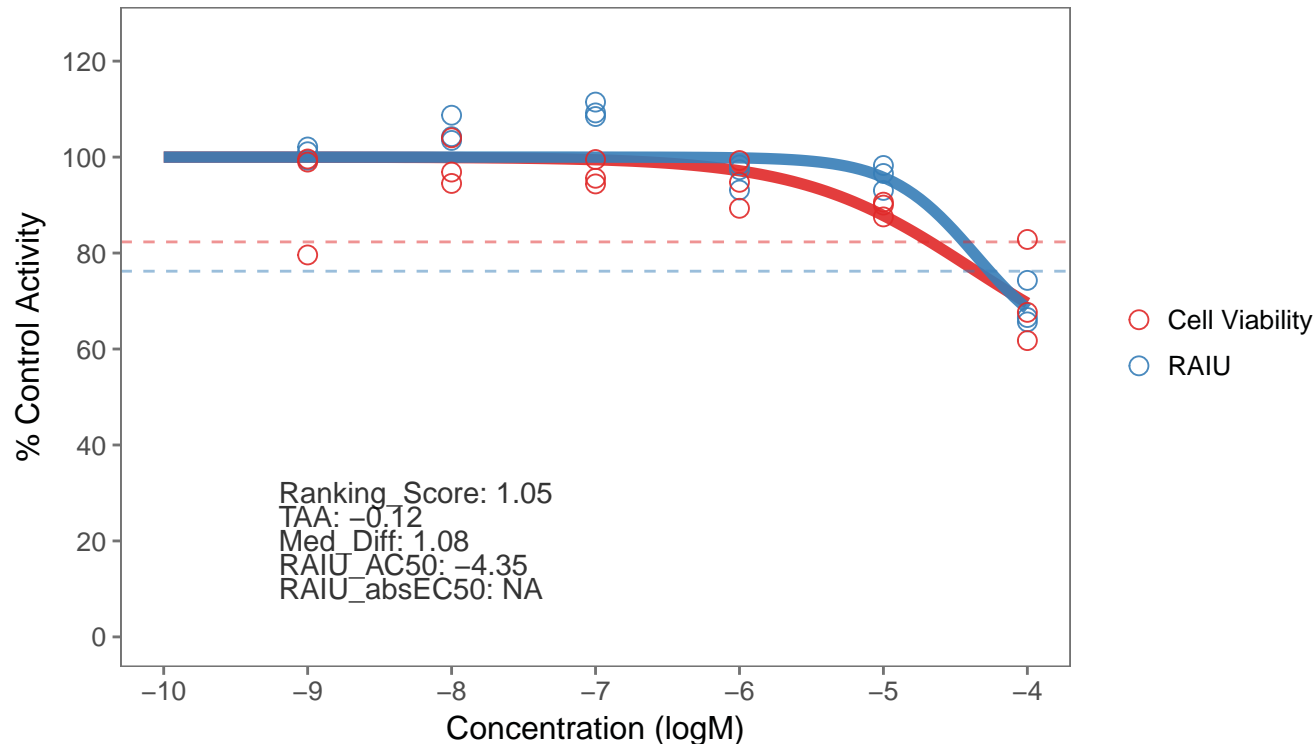

125. SPID: TP0001498D01

NAME: Dicloran

CAS NO: 99-30-9

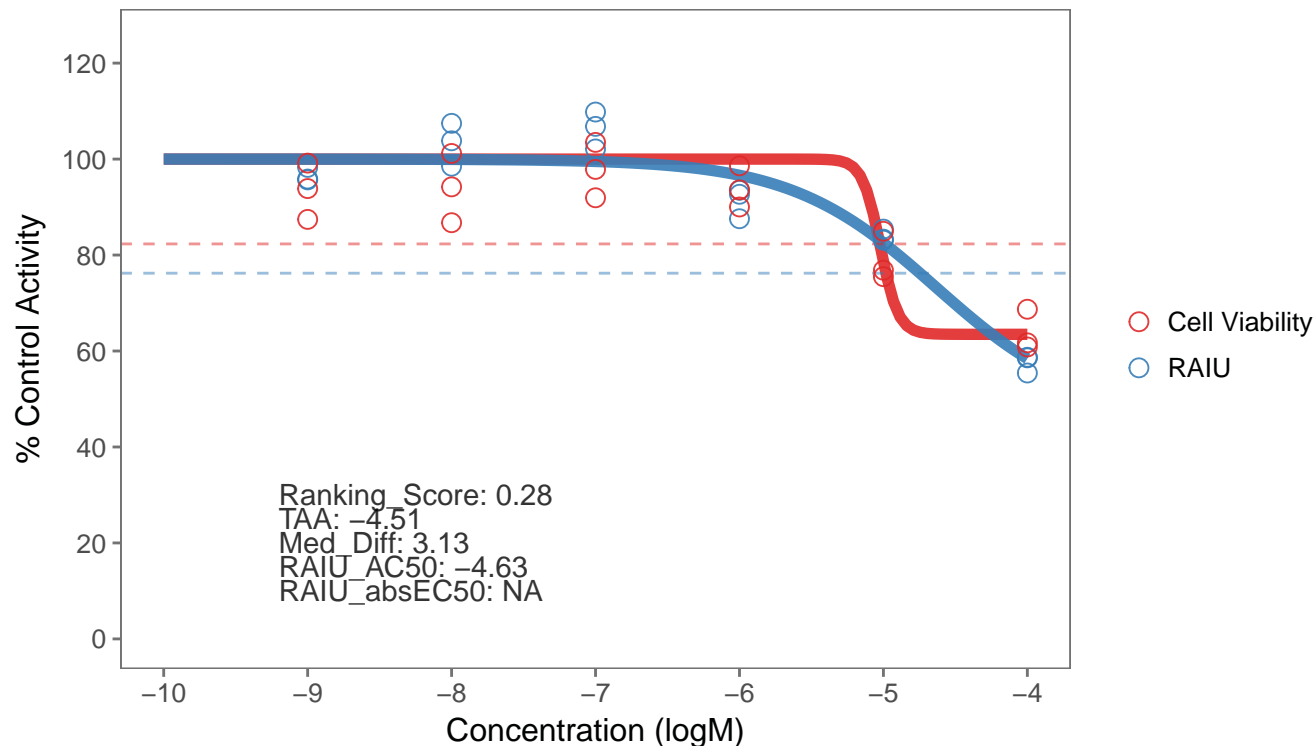

126. SPID: TP0001500D11

NAME: Oryzalin

CAS NO: 19044-88-3

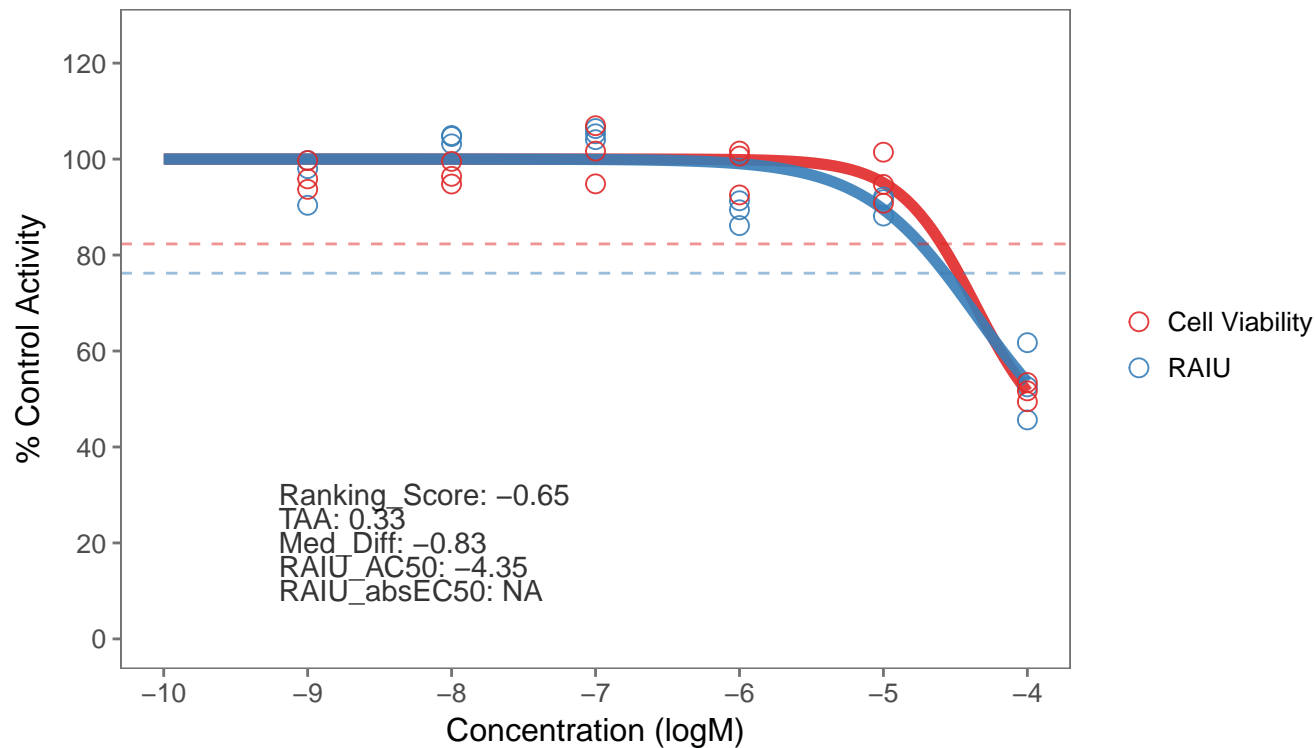

127. SPID: TP0001501B10

NAME: Fenbuconazole

CAS NO: 114369-43-6

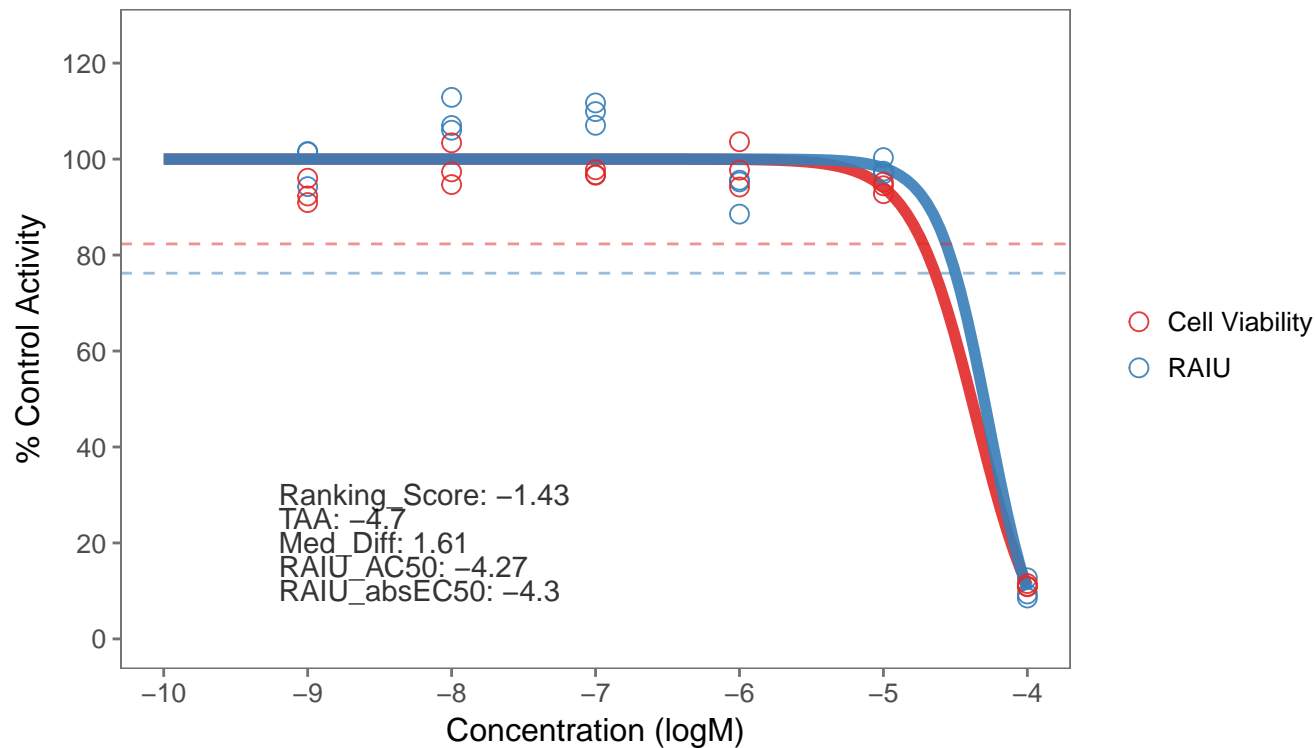

128. SPID: TP0001499E09

NAME: Thiram

CAS NO: 137-26-8

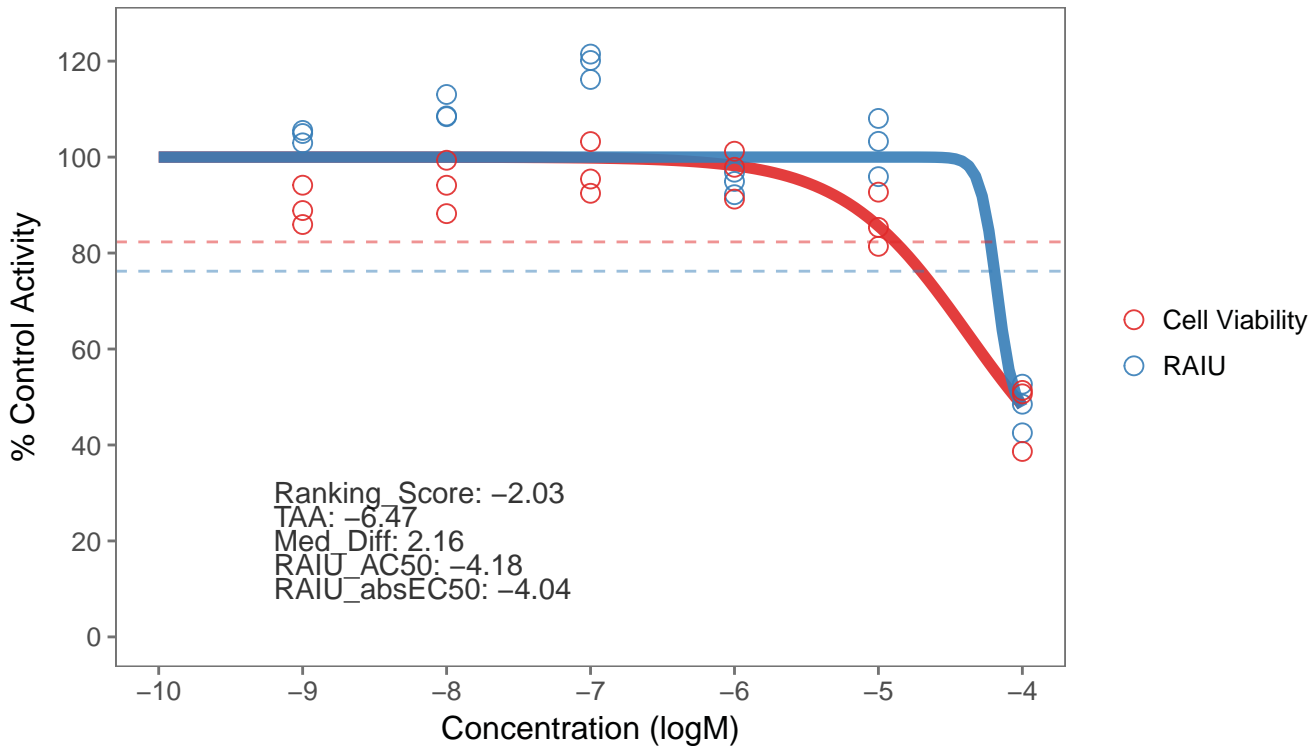

129. SPID: TP0001500B02

NAME: Tetramethrin

CAS NO: 7696-12-0

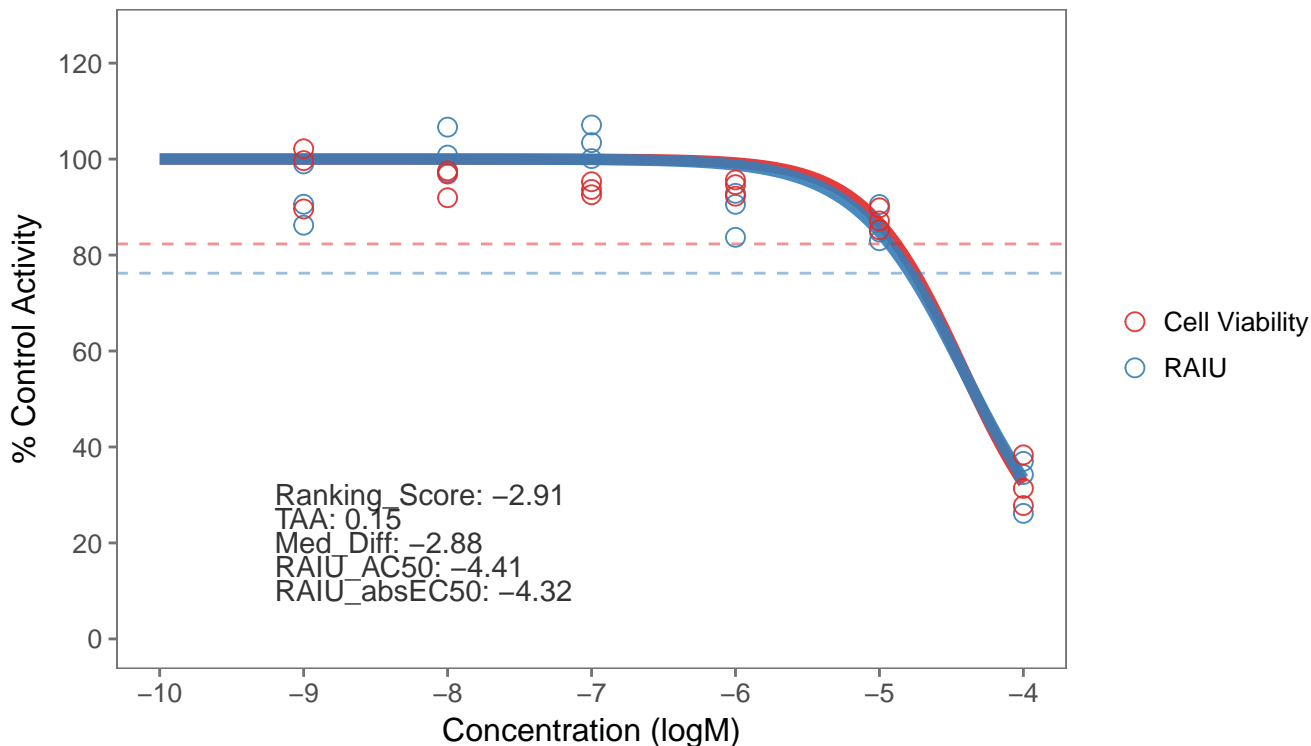

130. SPID: TP0001498D05

NAME: Profenofos

CAS NO: 41198-08-7

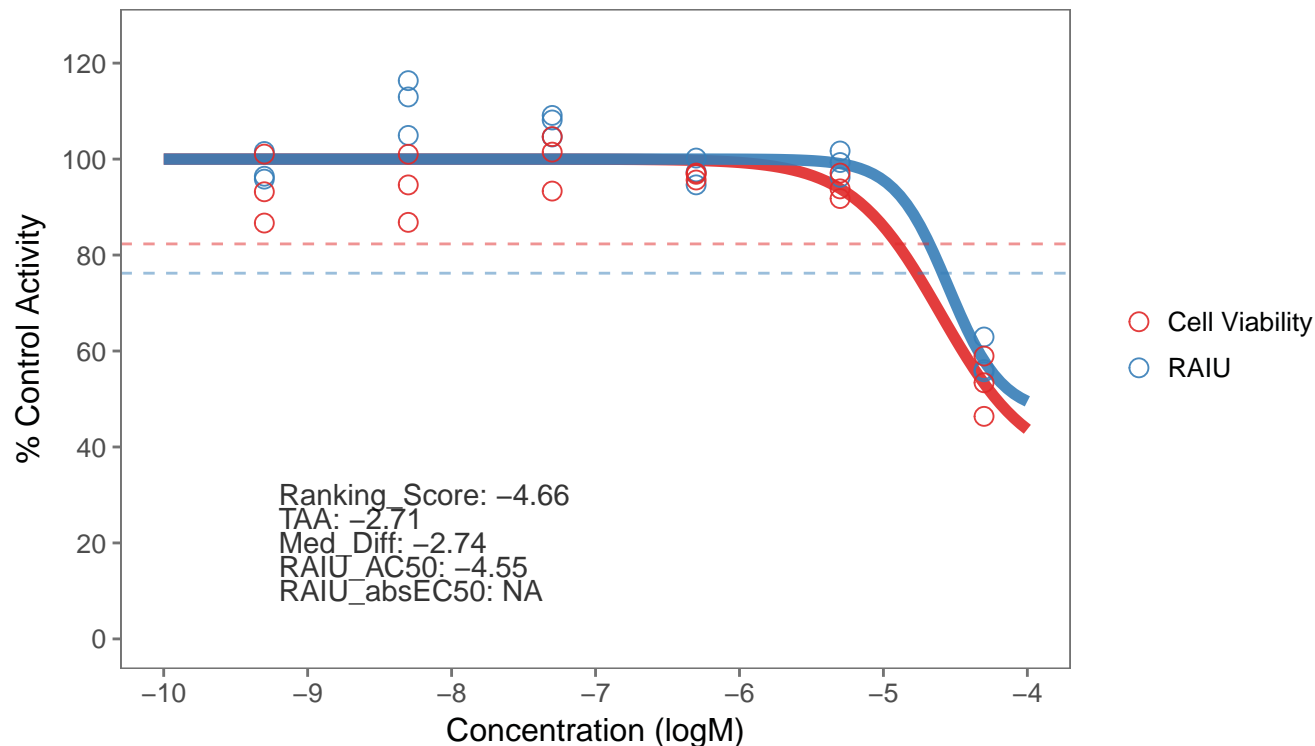

131. SPID: TP0001501D01

NAME: Quizalofop-ethyl

CAS NO: 76578-14-8

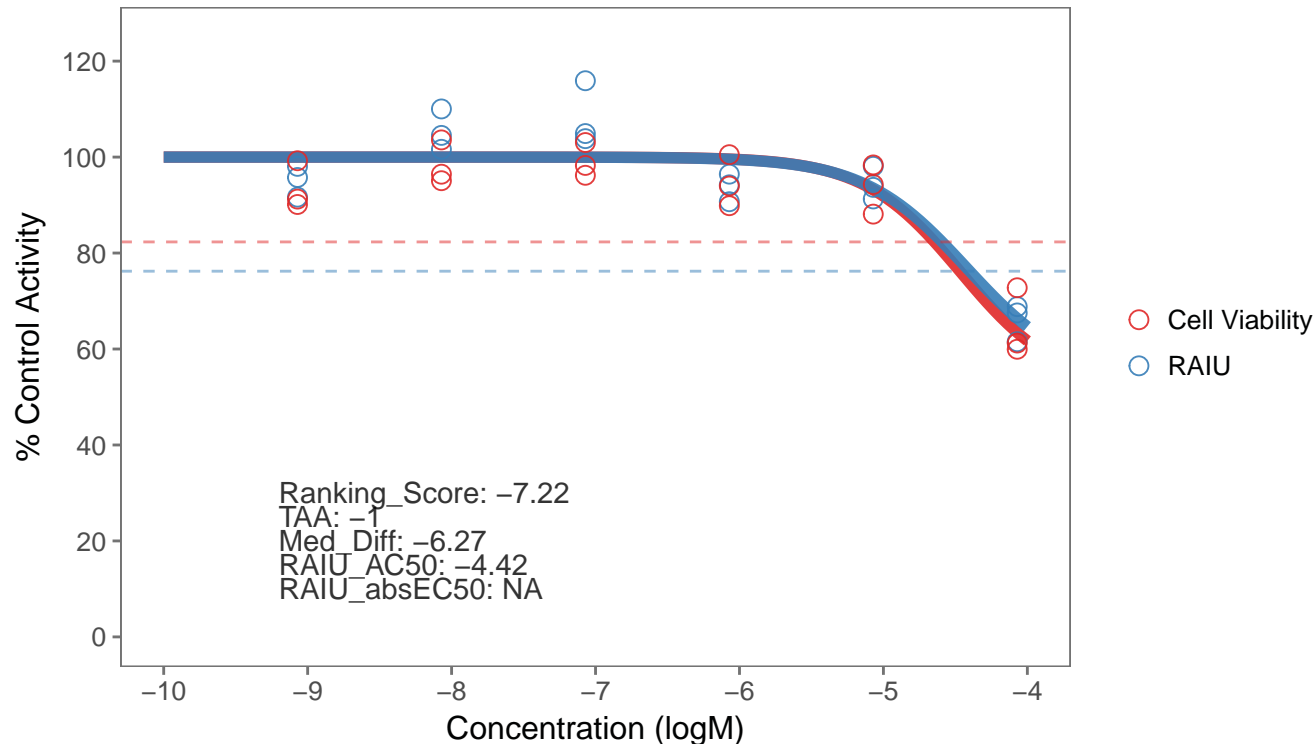



132. SPID: TP0001498D03

NAME: Prochloraz

CAS NO: 67747-09-5

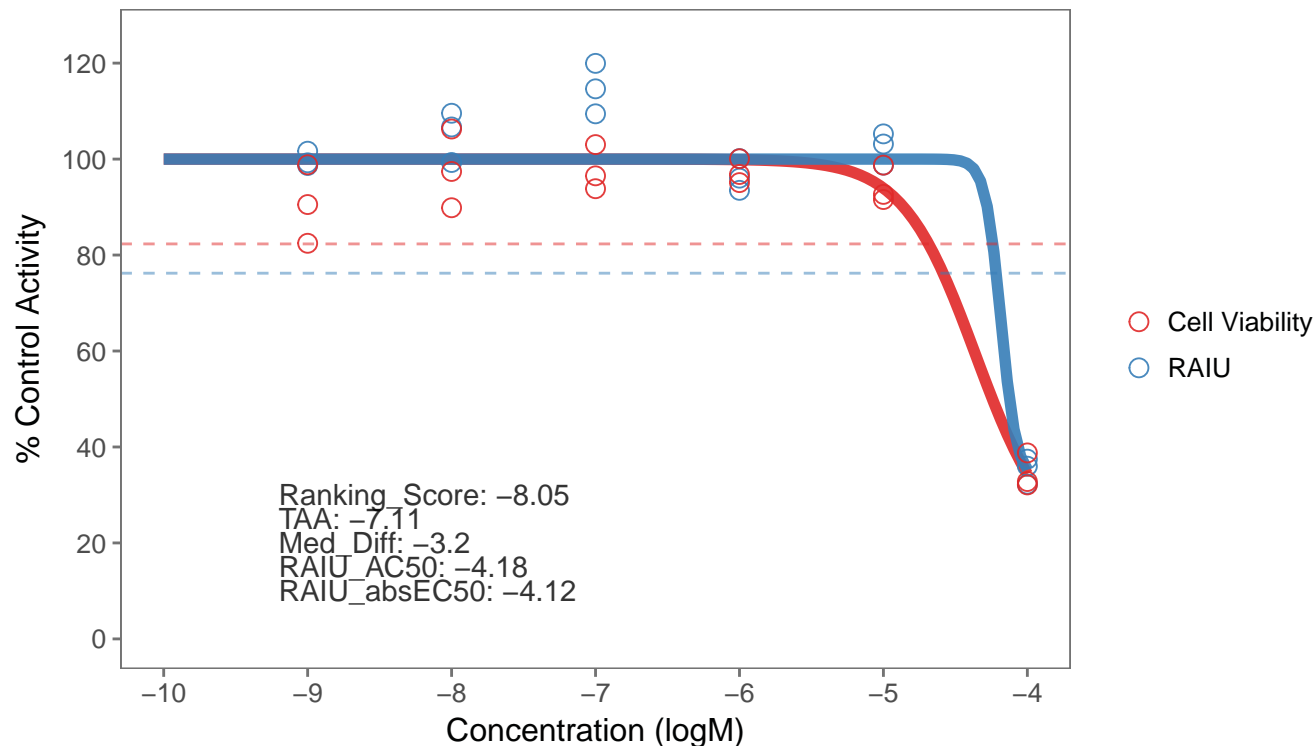

133. SPID: TP0001501C04

NAME: Milbemectin (mixture of 70% Milbemcin A4, 30% Milbemycin A3)

CAS NO: NOCAS\_34742

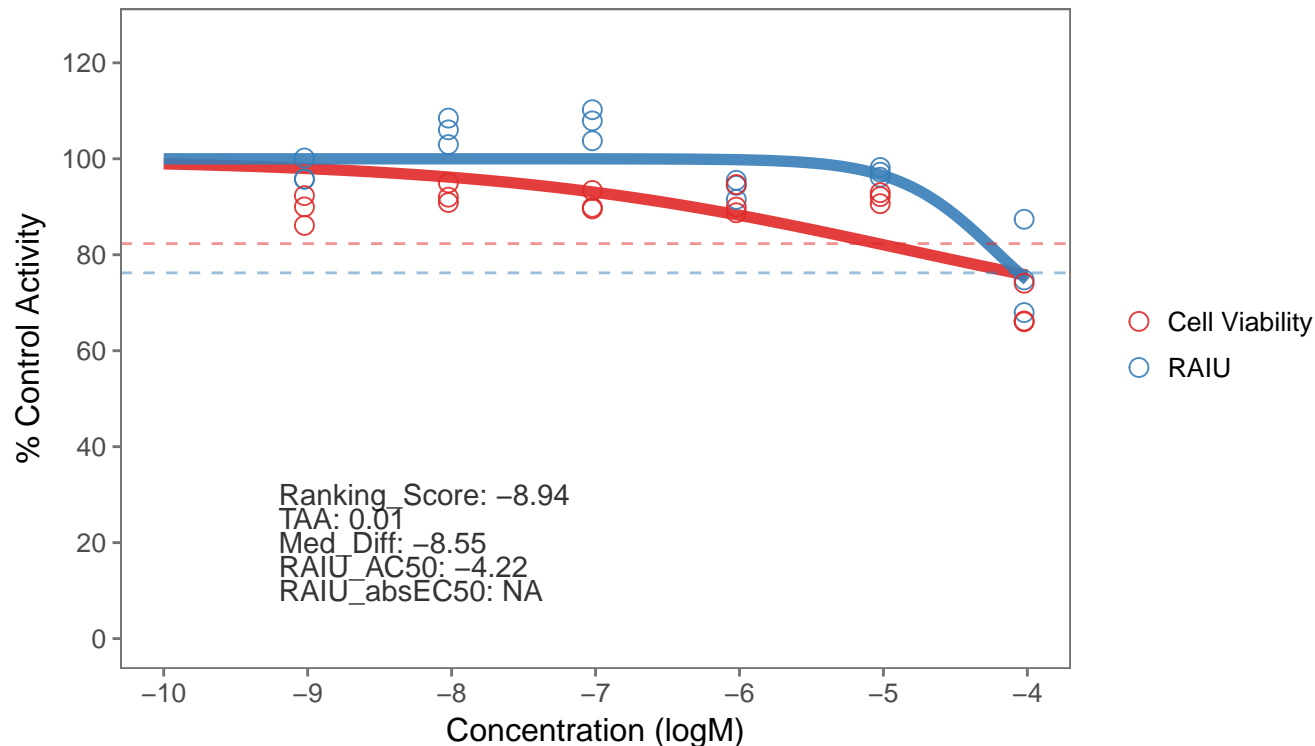

134. SPID: TP0001498B07

NAME: Captafol

CAS NO: 2425-06-1

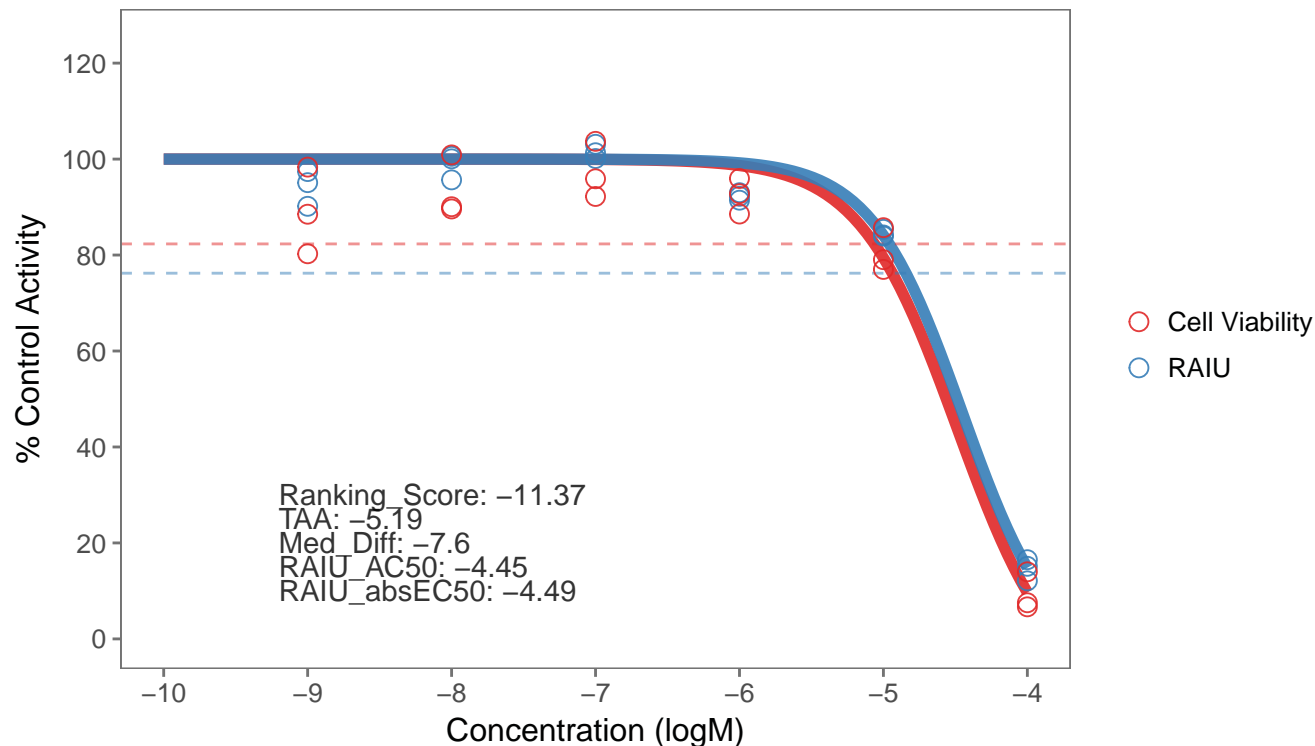

135. SPID: TP0001499G02

NAME: Tribufos

CAS NO: 78-48-8

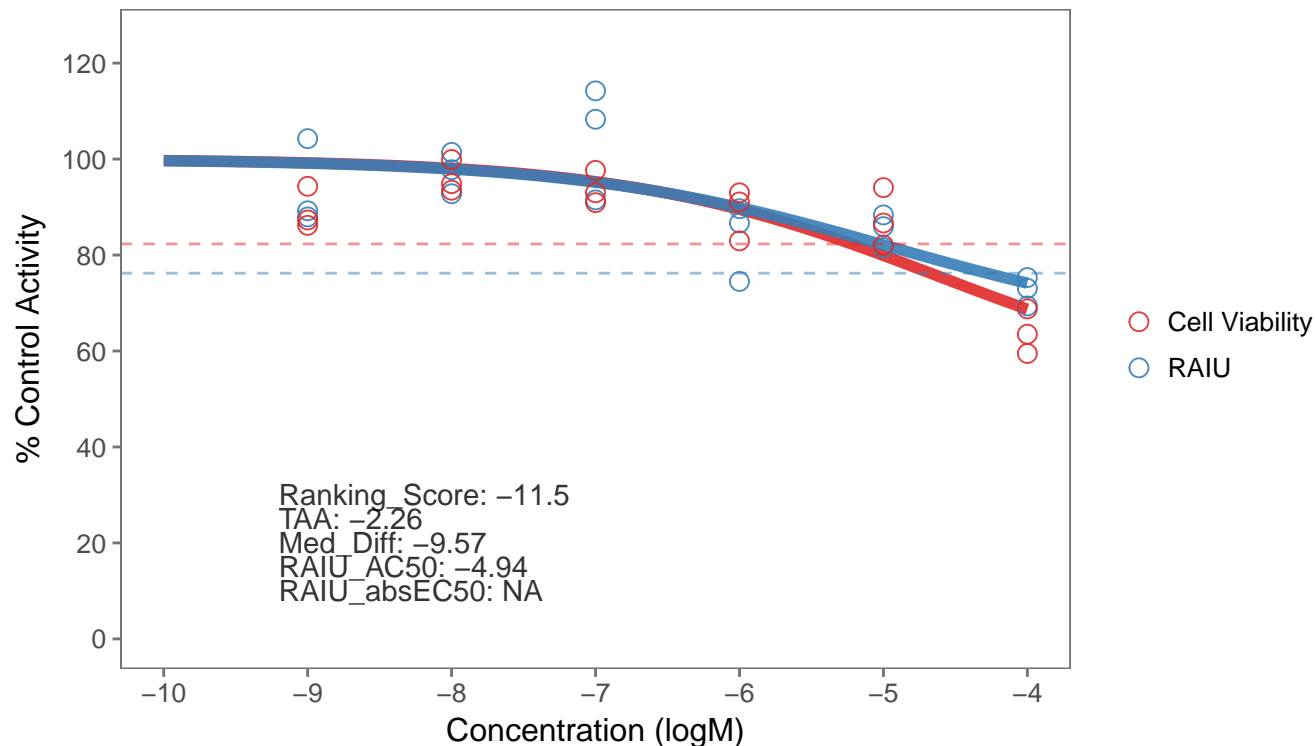

136. SPID: TP0001499C07

NAME: Benfluralin

CAS NO: 1861-40-1

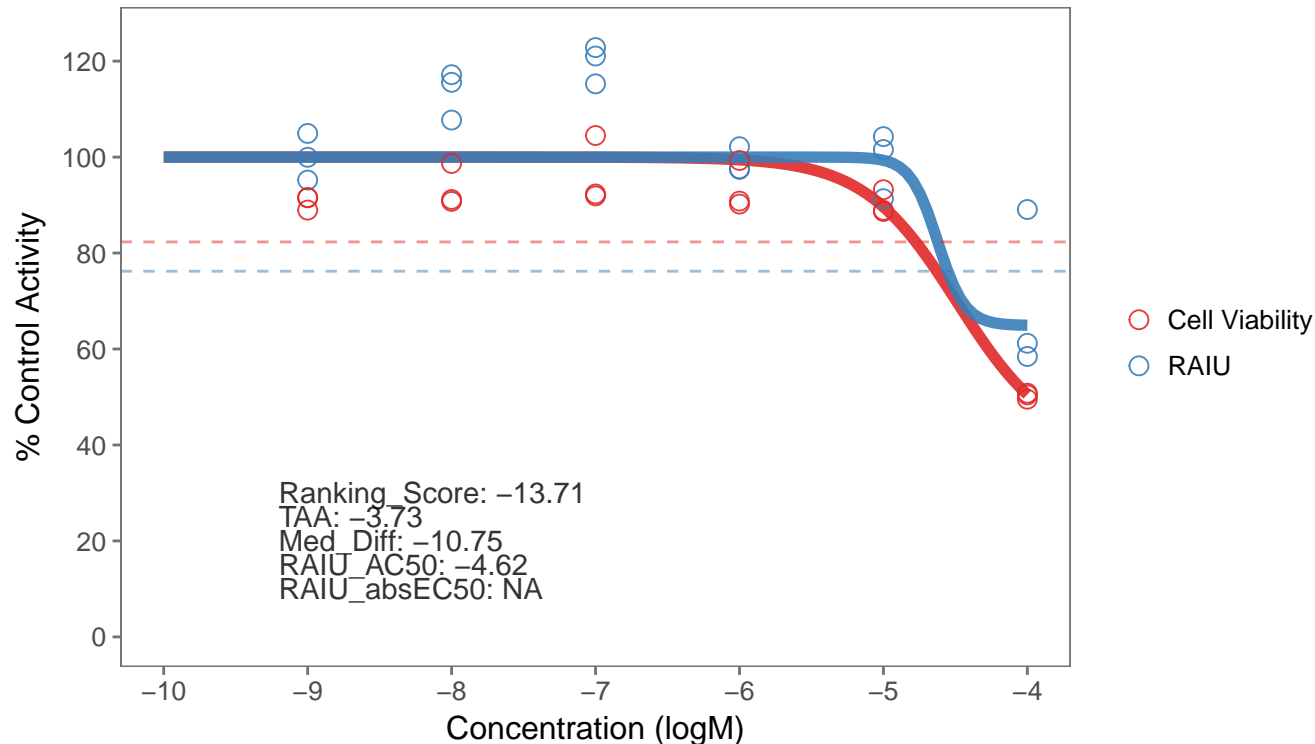

137. SPID: TP0001500E01

NAME: MGK-264

CAS NO: 113-48-4

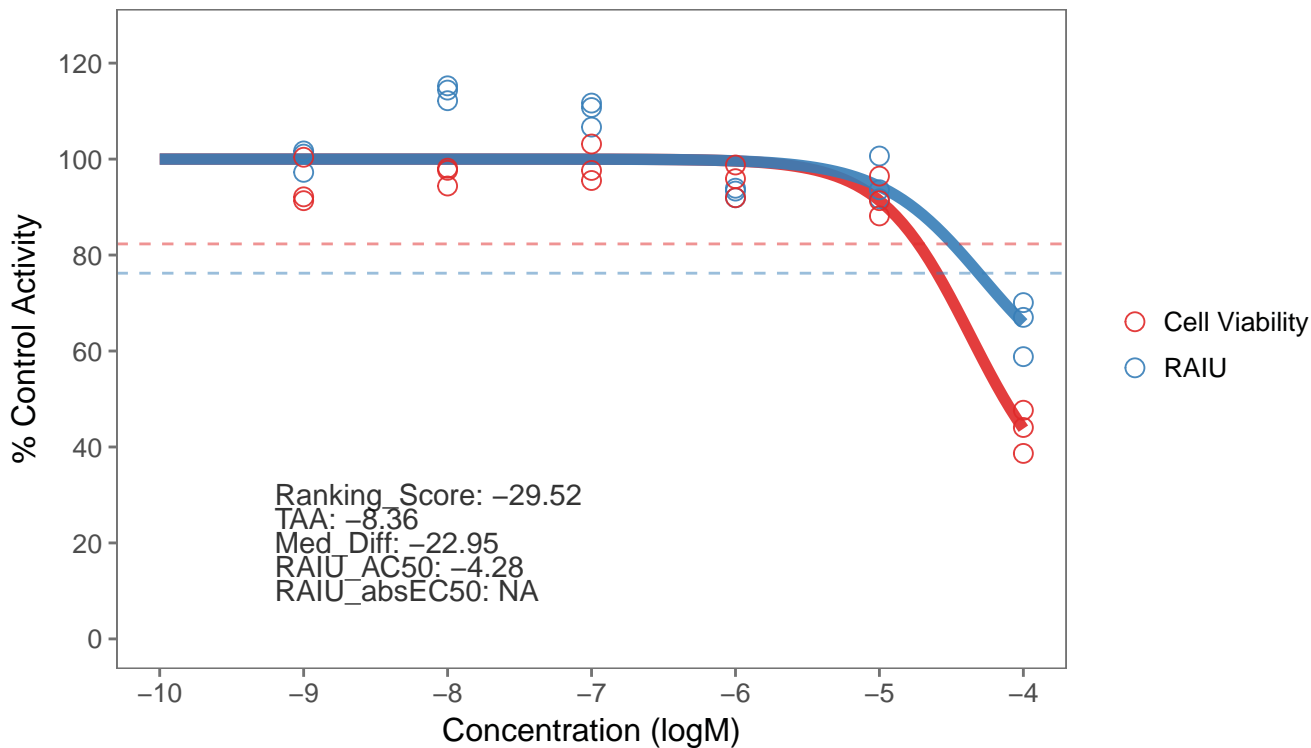

138. SPID: TP0001498C03

NAME: Bromoxynil

CAS NO: 1689-84-5

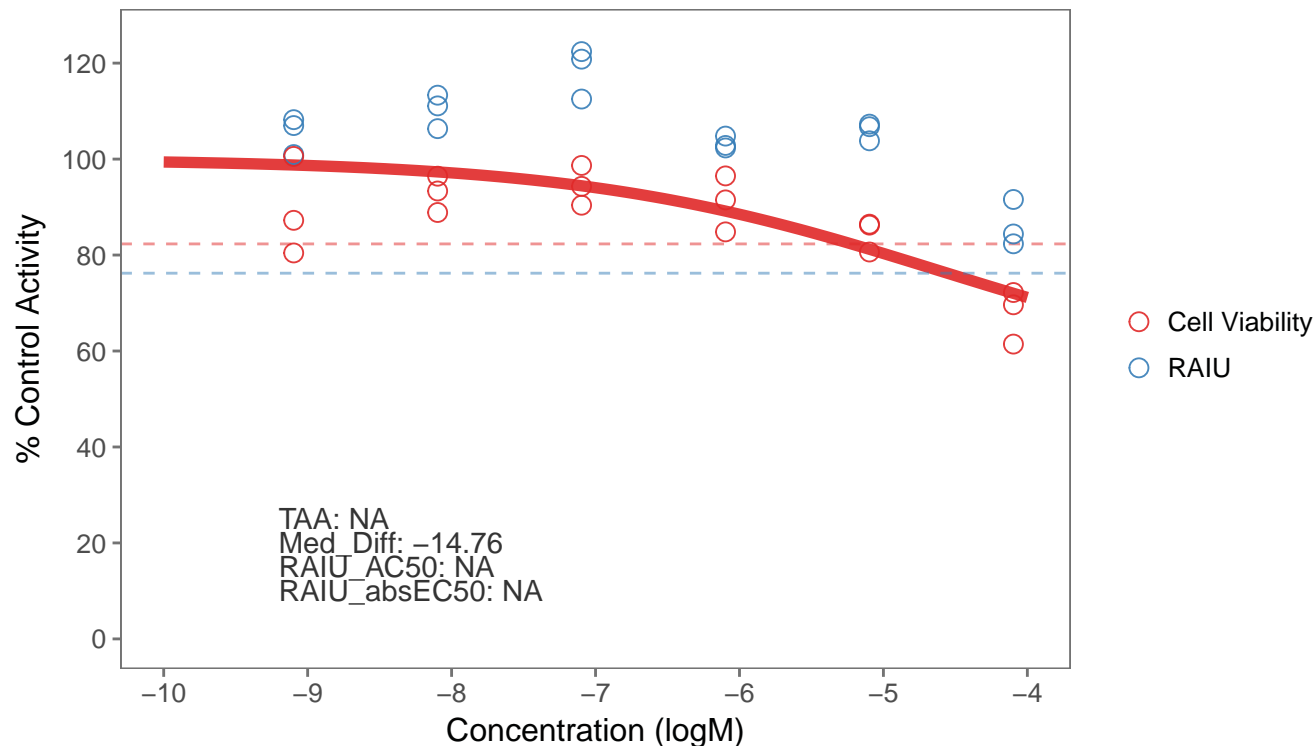

139. SPID: TP0001501F04

NAME: 2-Phenylphenol

CAS NO: 90-43-7

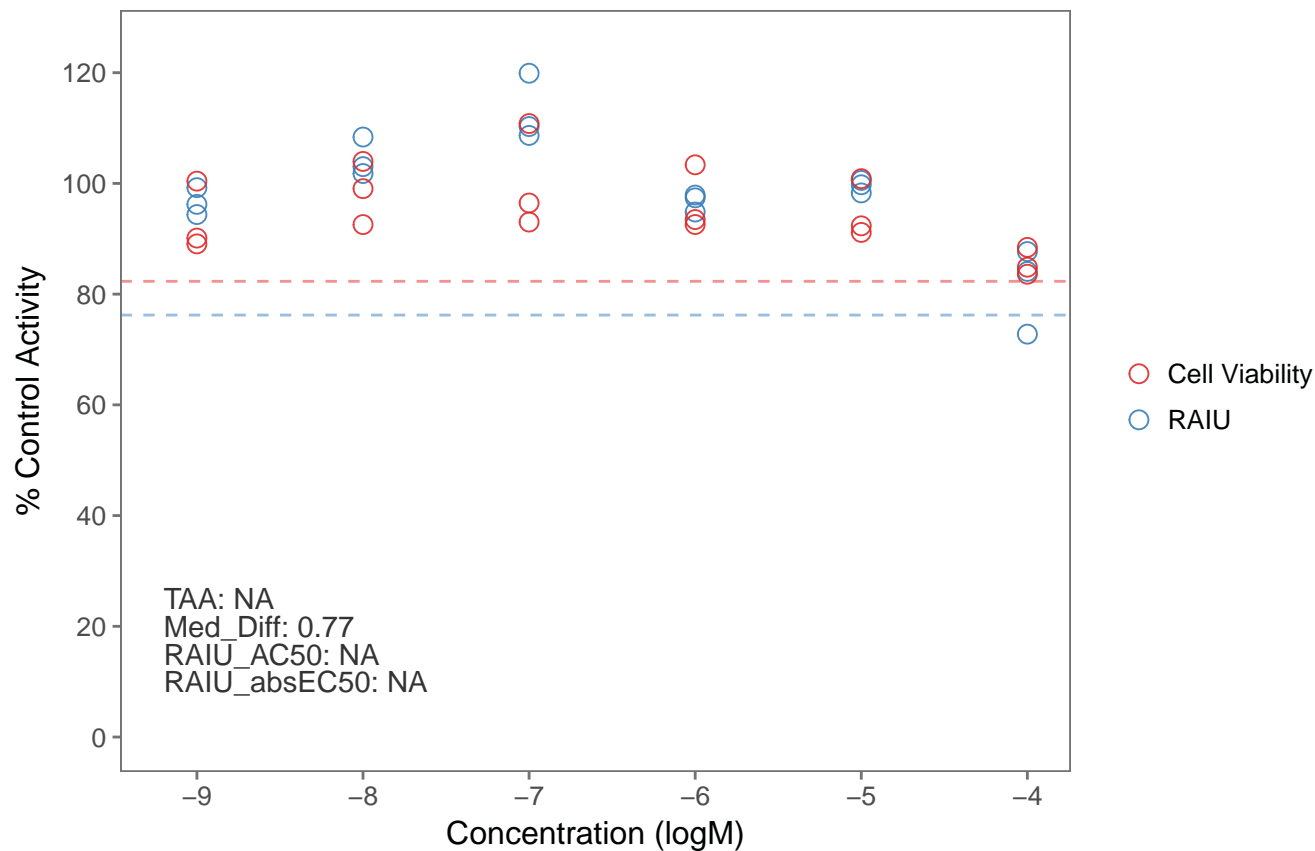



140. SPID: TP0001501G02

NAME: Prometon

CAS NO: 1610-18-0

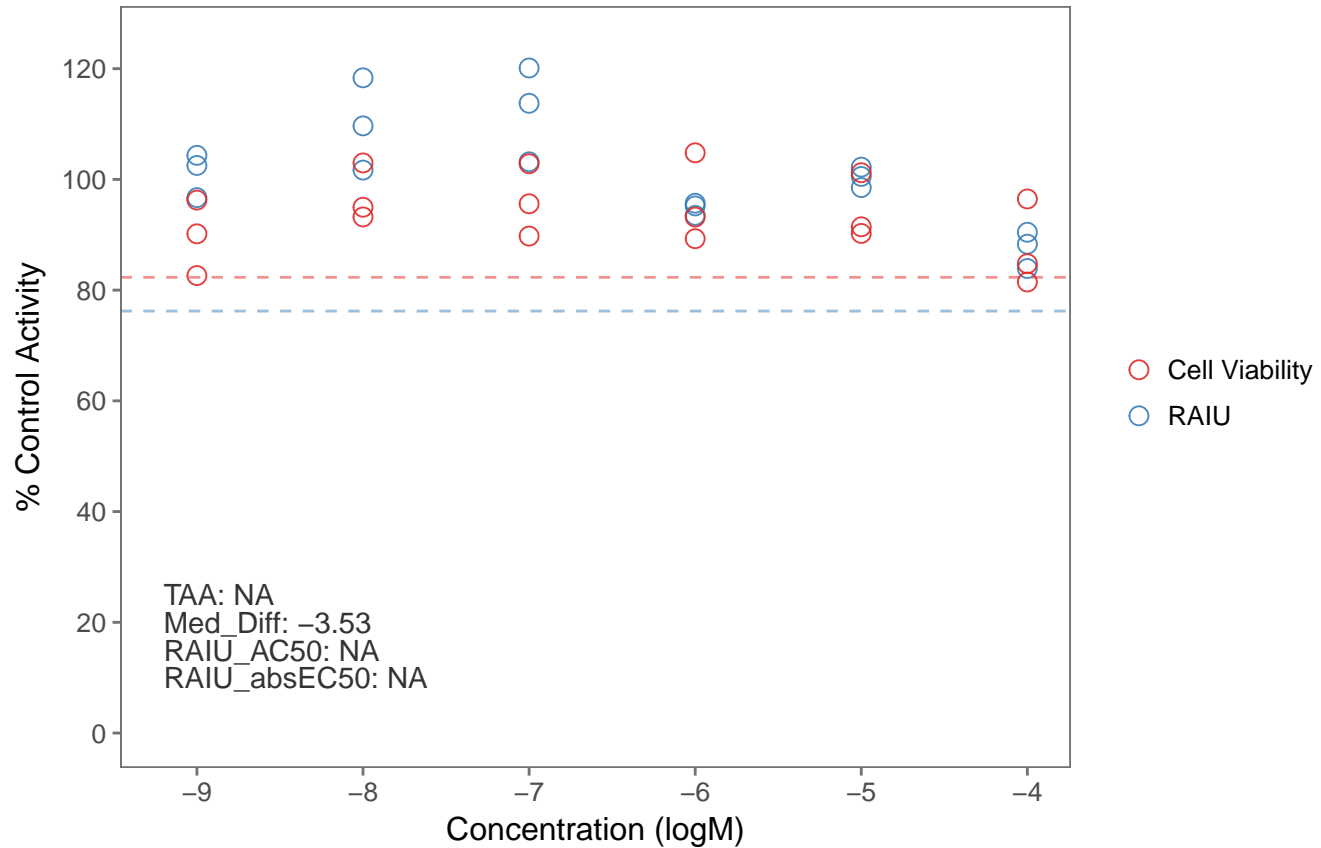

141. SPID: TP0001501G04

NAME: Clomazone

CAS NO: 81777-89-1

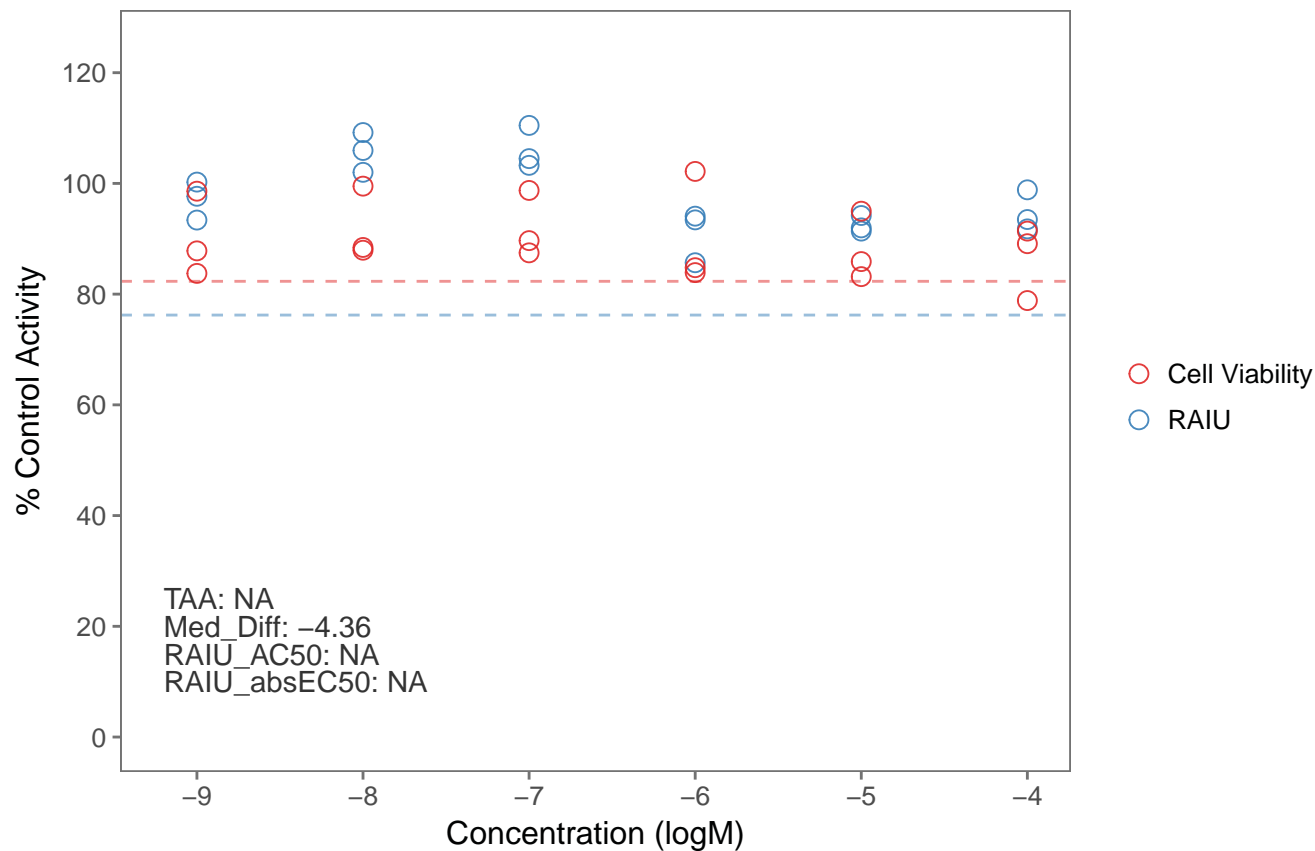

142. SPID: TP0001502C09

NAME: EPTC

CAS NO: 759-94-4

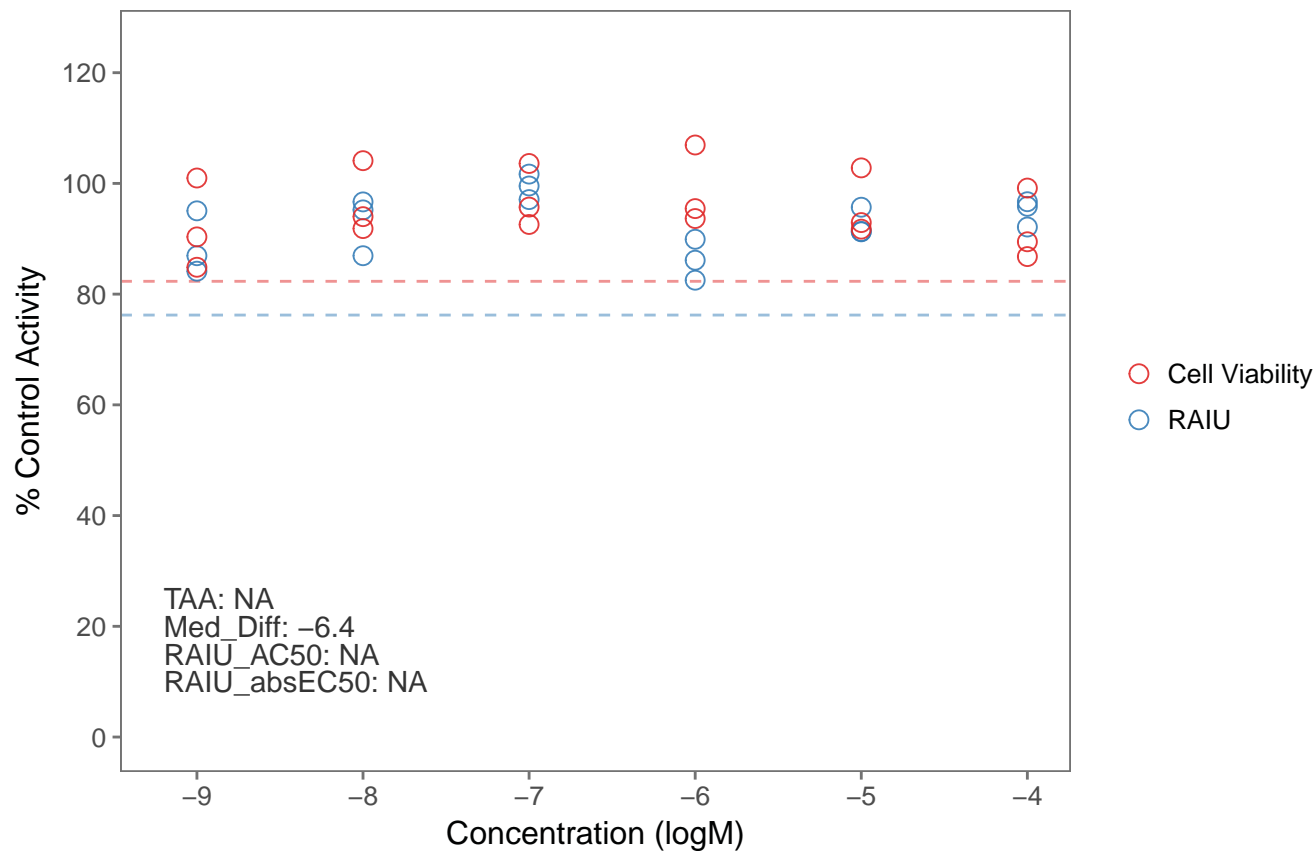

143. SPID: TP0001502E01

NAME: Naled

CAS NO: 300-76-5

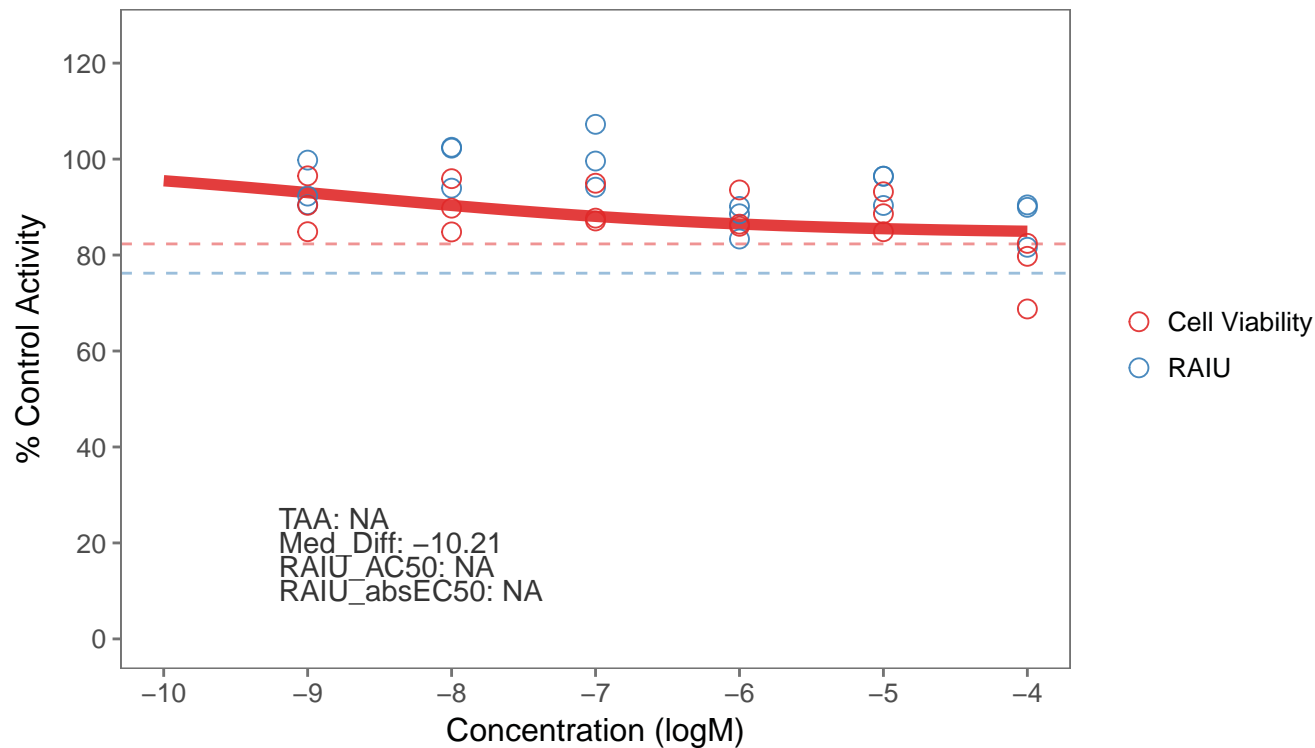

144. SPID: TP0001502E03

NAME: Linuron

CAS NO: 330-55-2

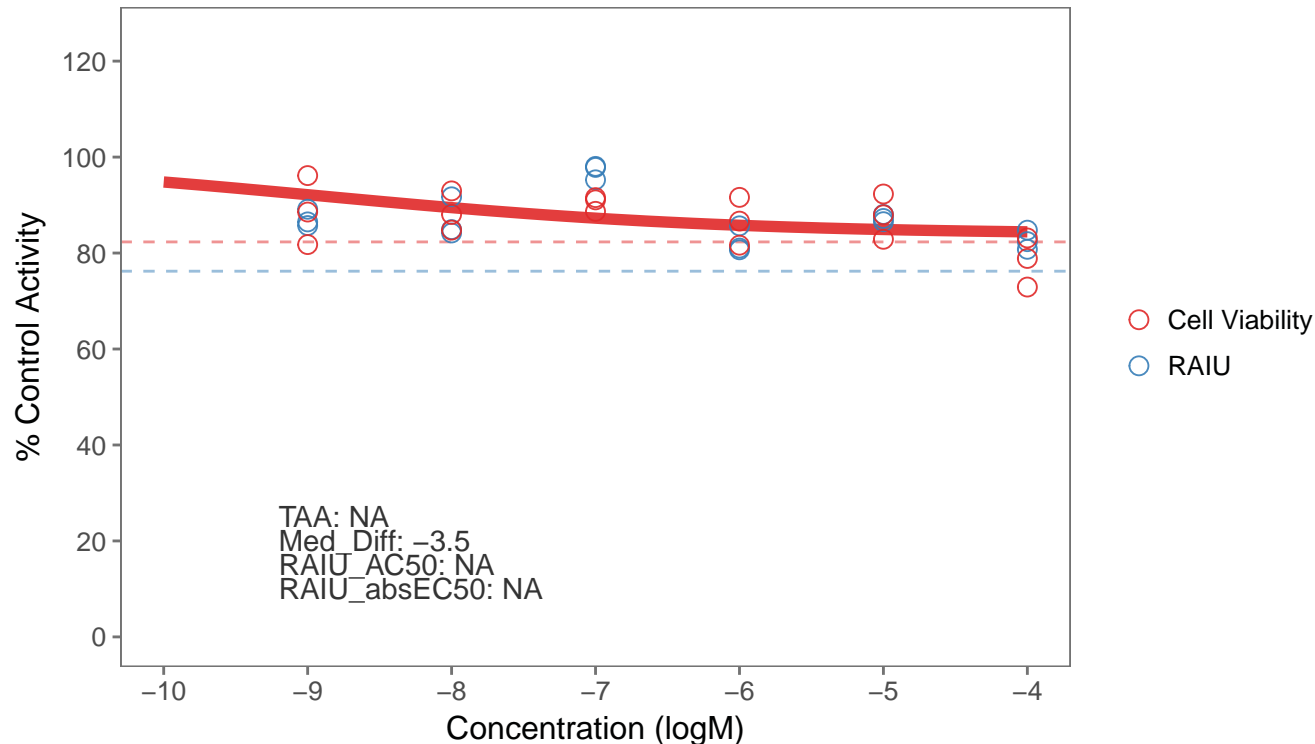

145. SPID: TP0001500A01  
NAME: Acibenzolar-S-methyl  
CAS NO: 135158-54-2

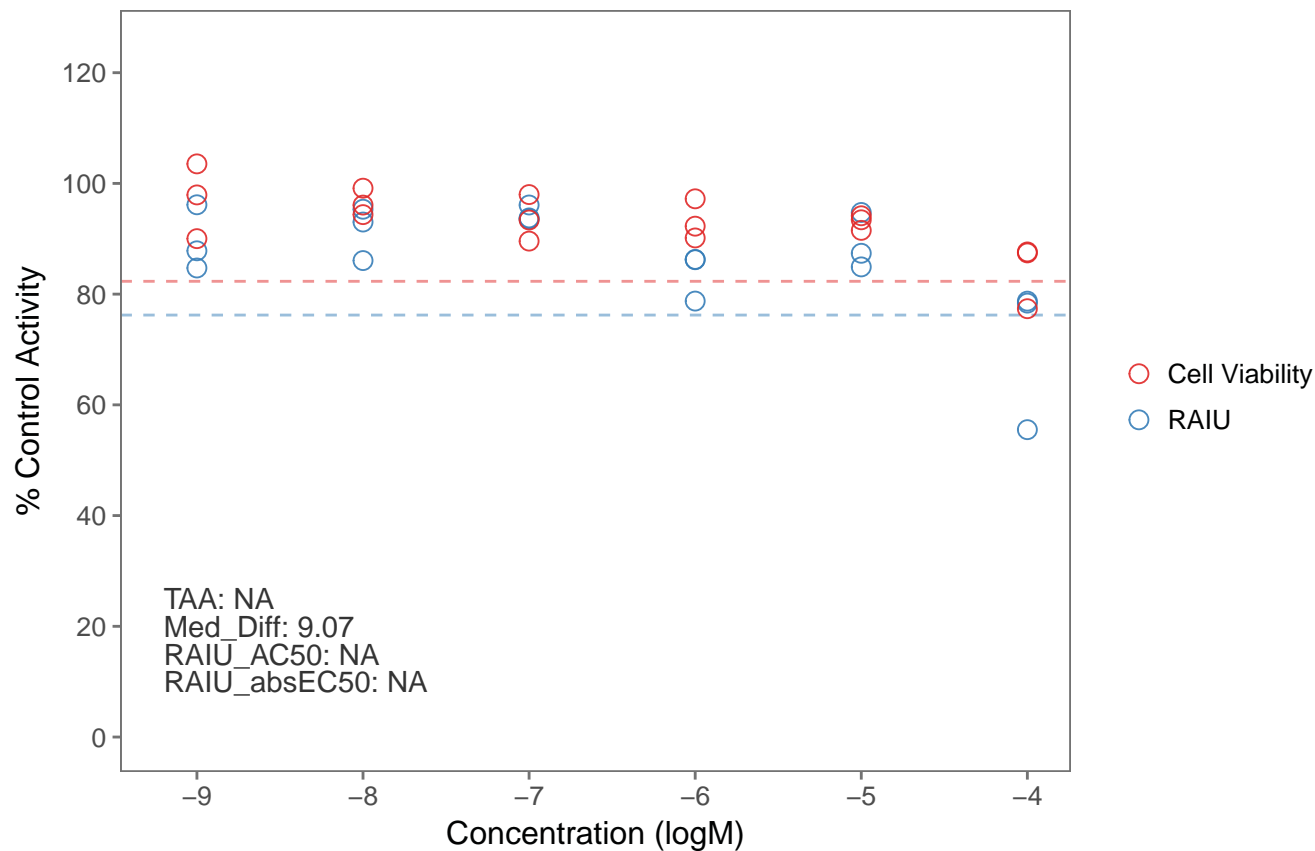

146. SPID: TP0001500B07

NAME: Tefluthrin

CAS NO: 79538-32-2

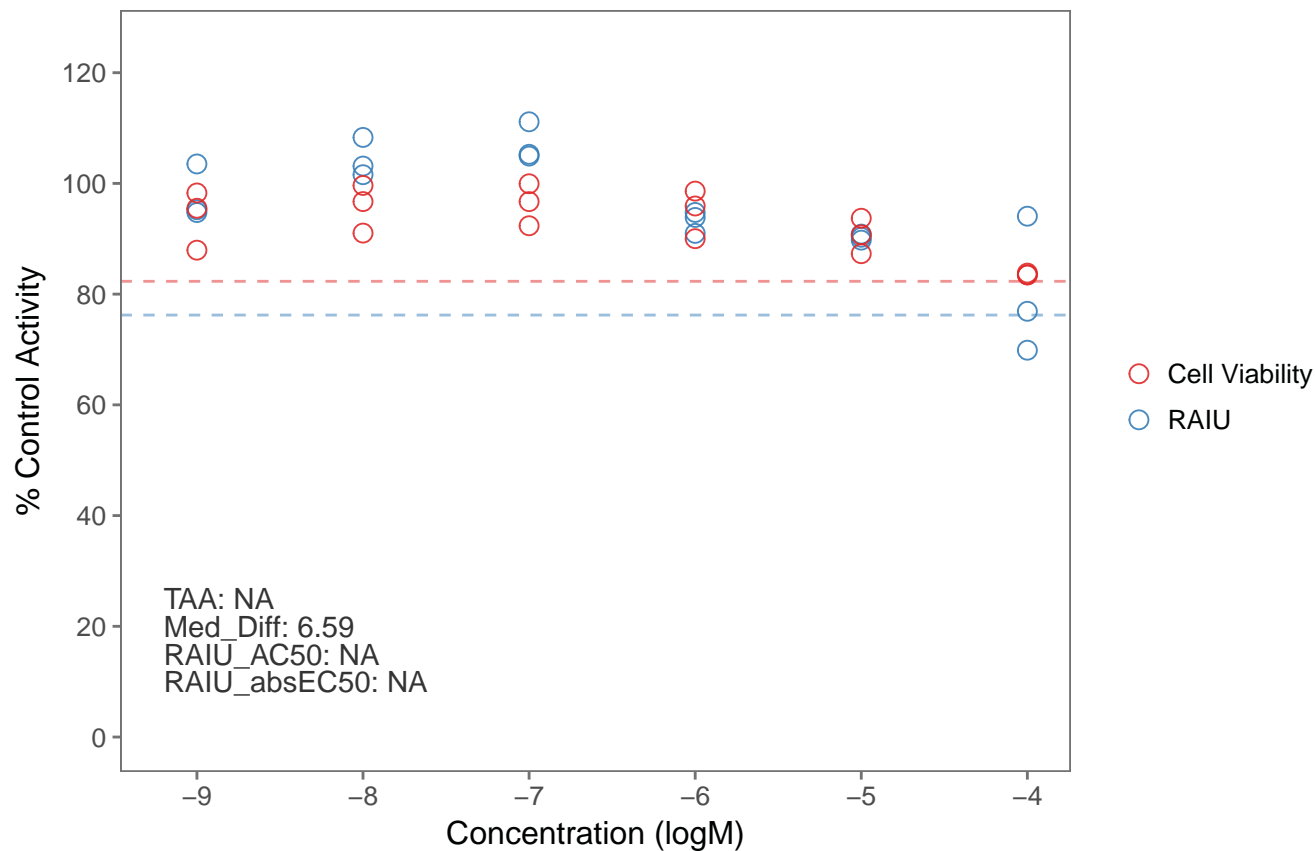

147. SPID: TP0001500C05

NAME: Butachlor

CAS NO: 23184-66-9

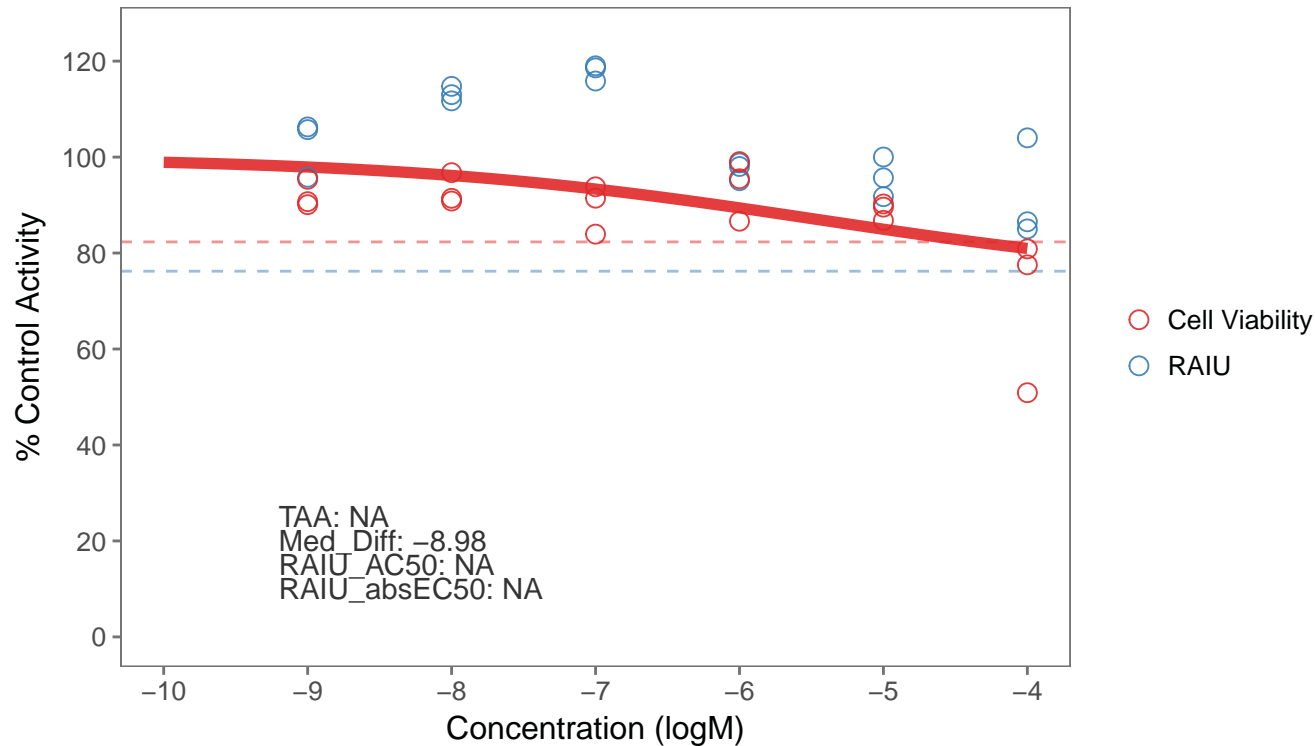



148. SPID: TP0001500F03

NAME: Mancozeb

CAS NO: 8018-01-7

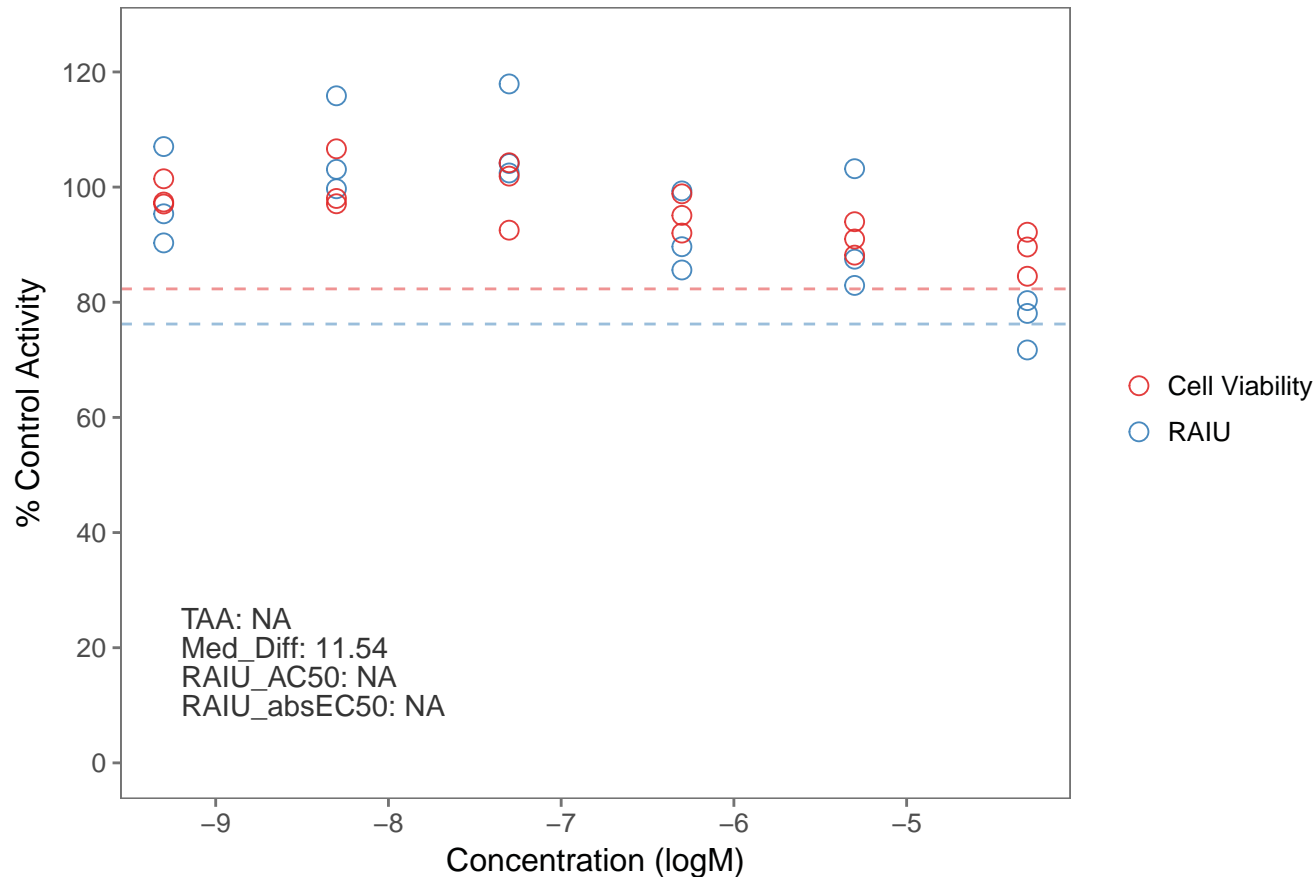

149. SPID: TP0001500F04

NAME: Boscalid

CAS NO: 188425-85-6

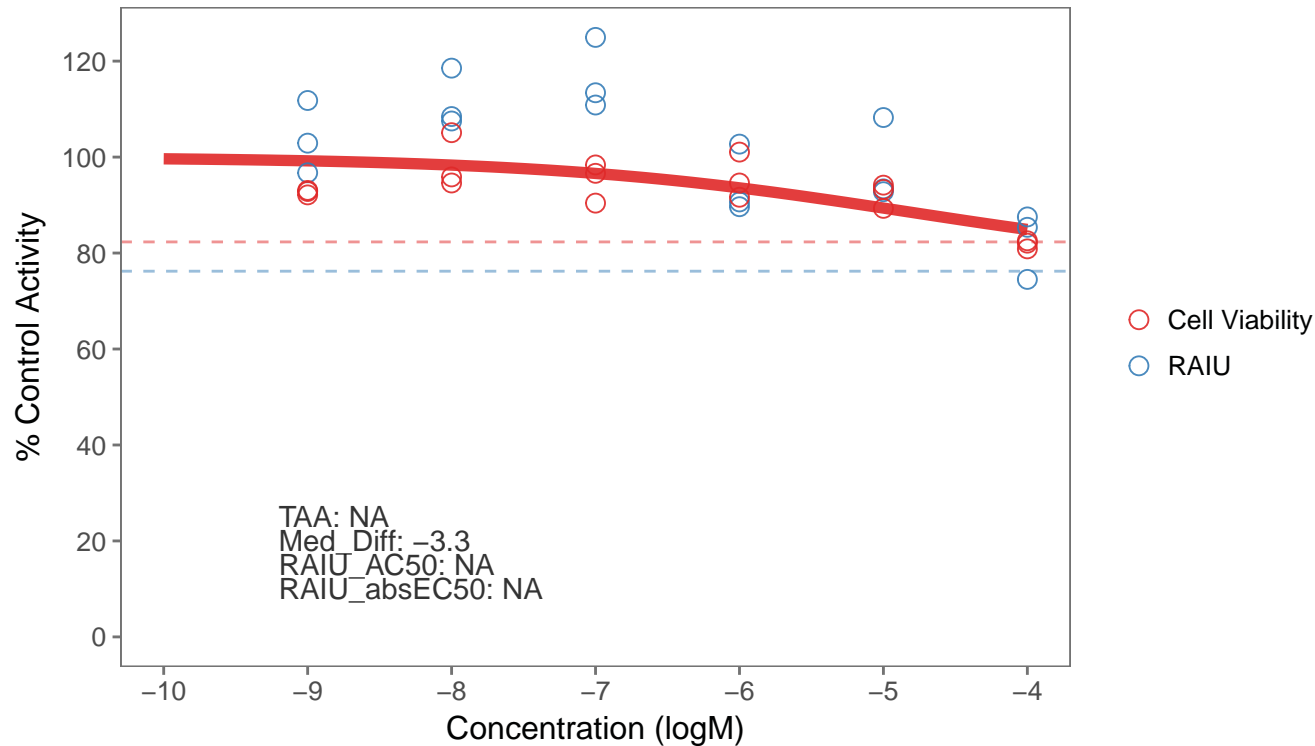

150. SPID: TP0001500G02  
NAME: Azinphos-methyl  
CAS NO: 86-50-0

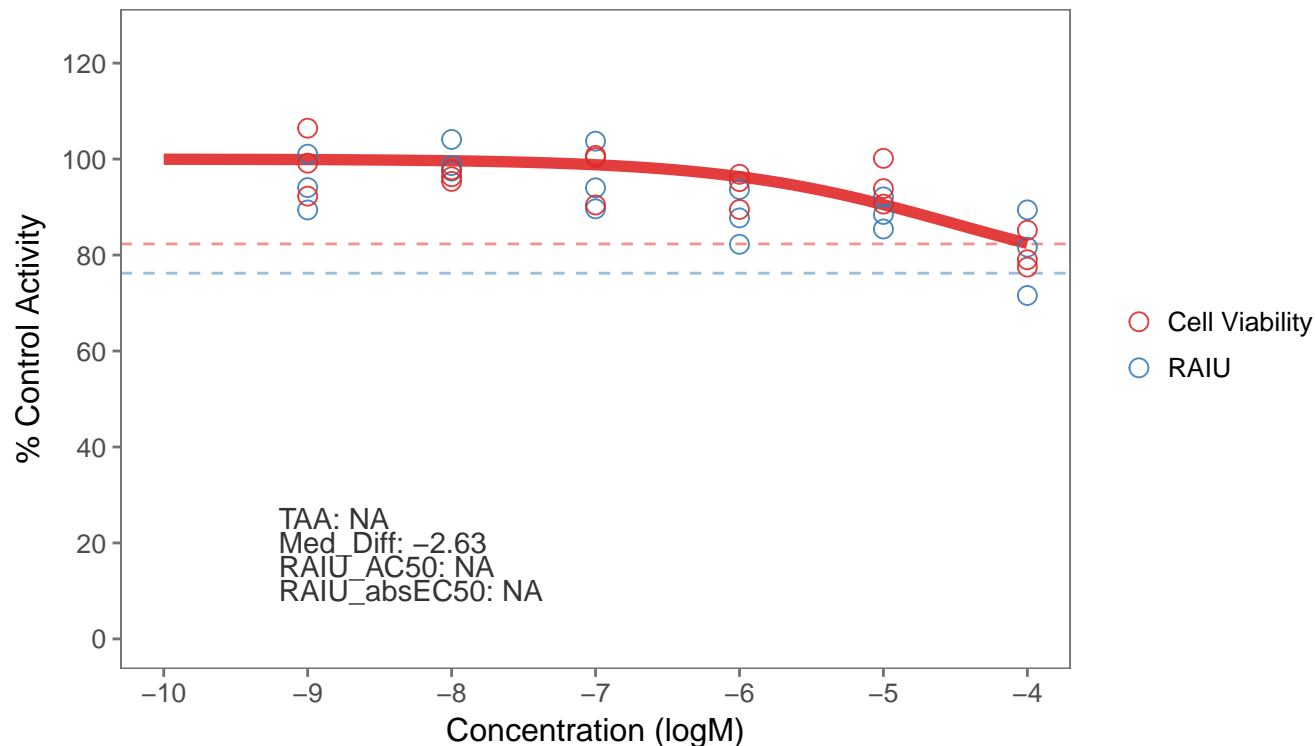

151. SPID: TP0001500G07

NAME: Butafenacil

CAS NO: 134605-64-4

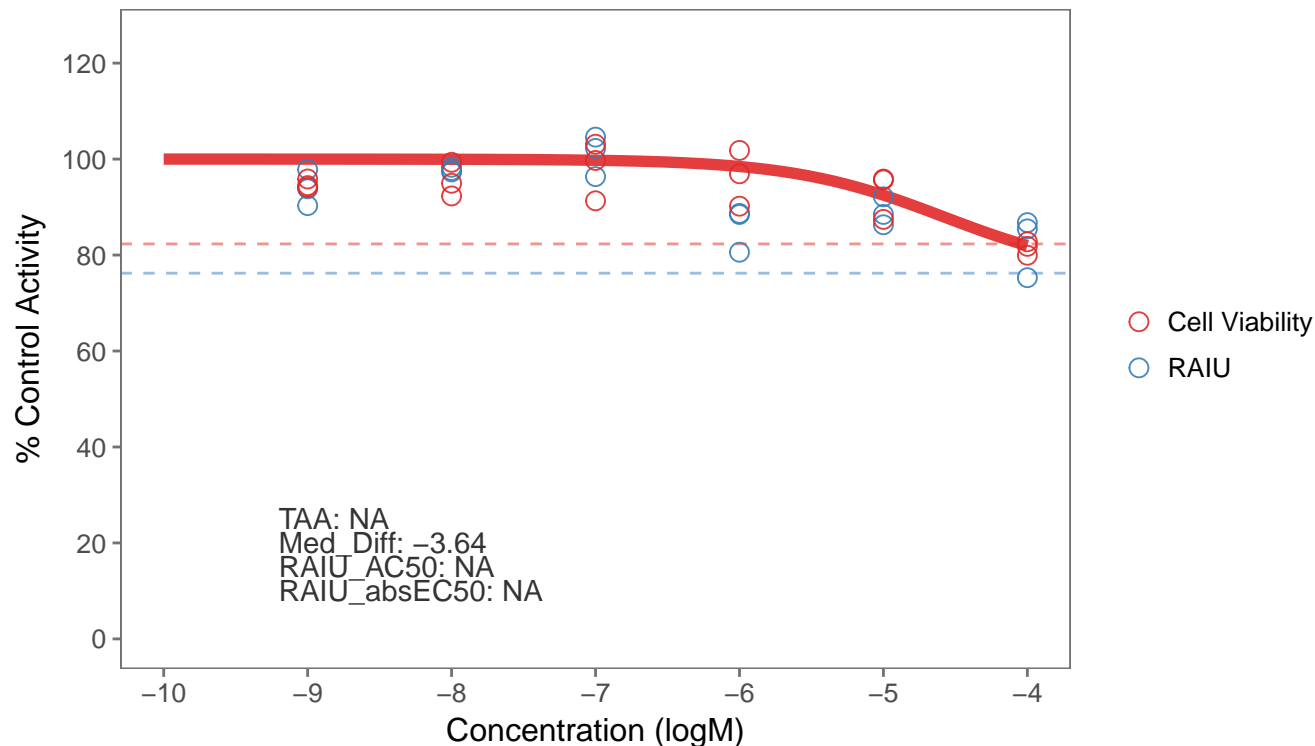

152. SPID: TP0001498C11

NAME: Malathion

CAS NO: 121-75-5

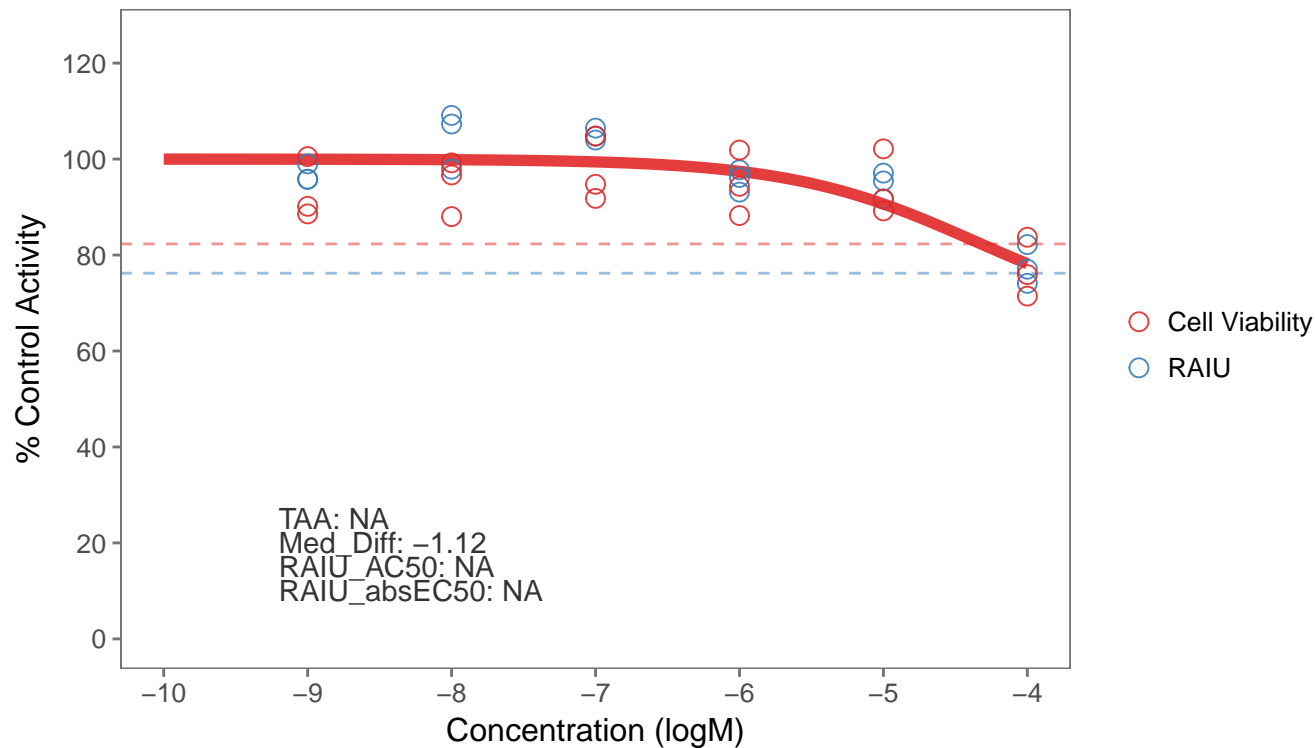

153. SPID: TP0001498D02

NAME: Chlorothalonil

CAS NO: 1897-45-6

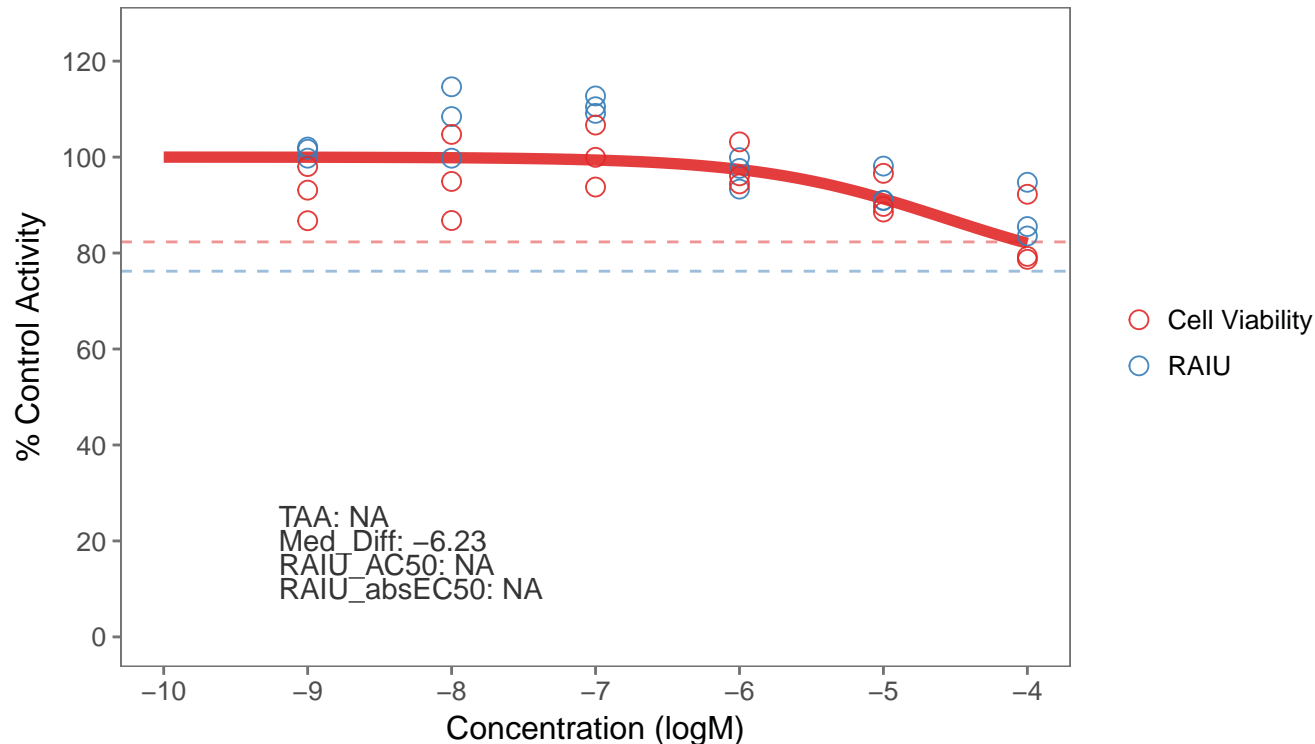

154. SPID: TP0001498E04

NAME: Nitrapyrin

CAS NO: 1929-82-4

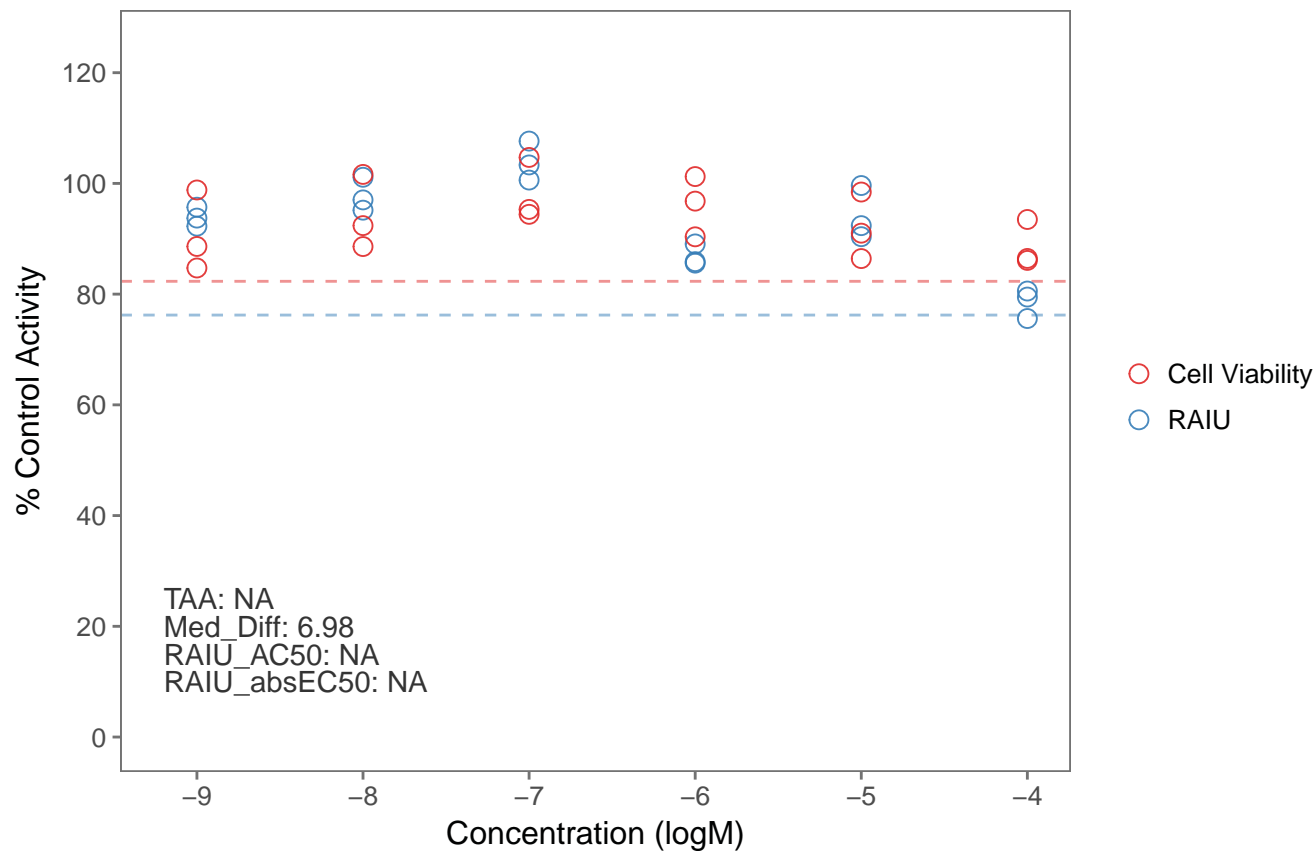

155. SPID: TP0001498F03

NAME: Napropamide

CAS NO: 15299-99-7

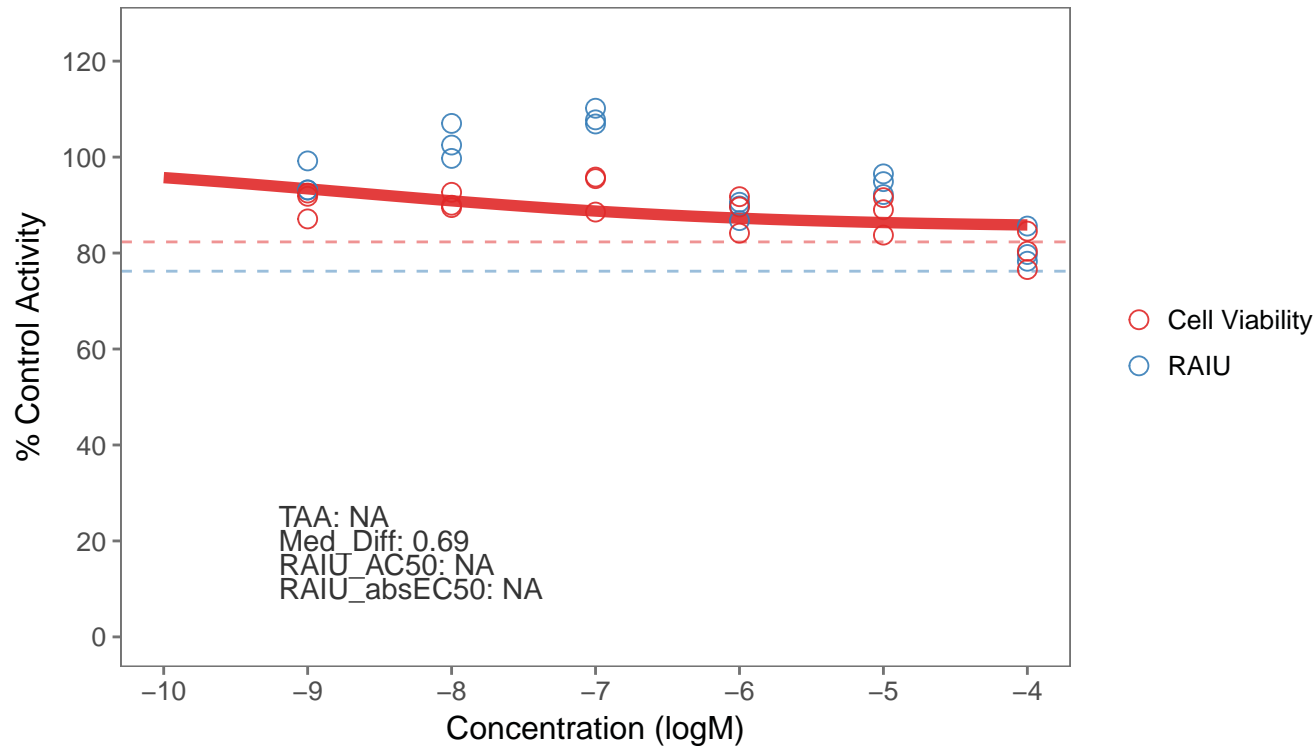



156. SPID: TP0001498G02

NAME: Propanil

CAS NO: 709-98-8

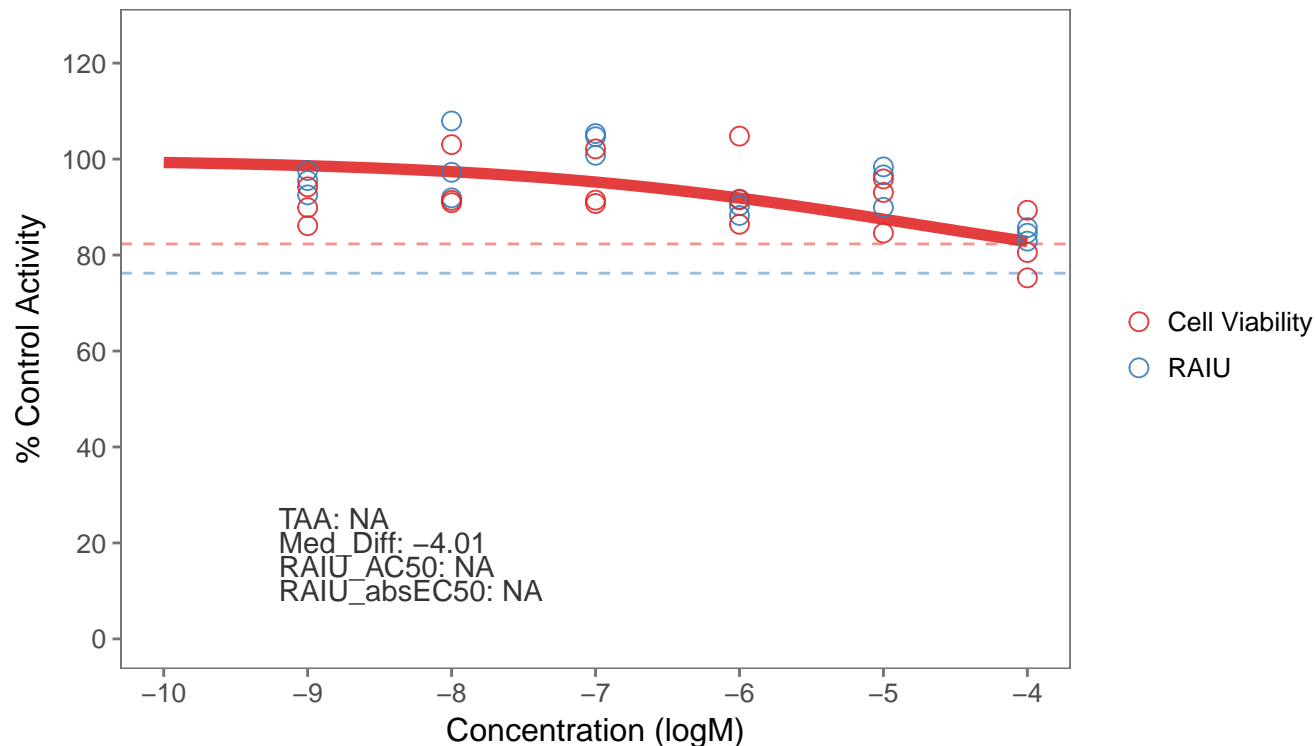

157. SPID: TP0001498G08

NAME: Propetamphos

CAS NO: 31218-83-4

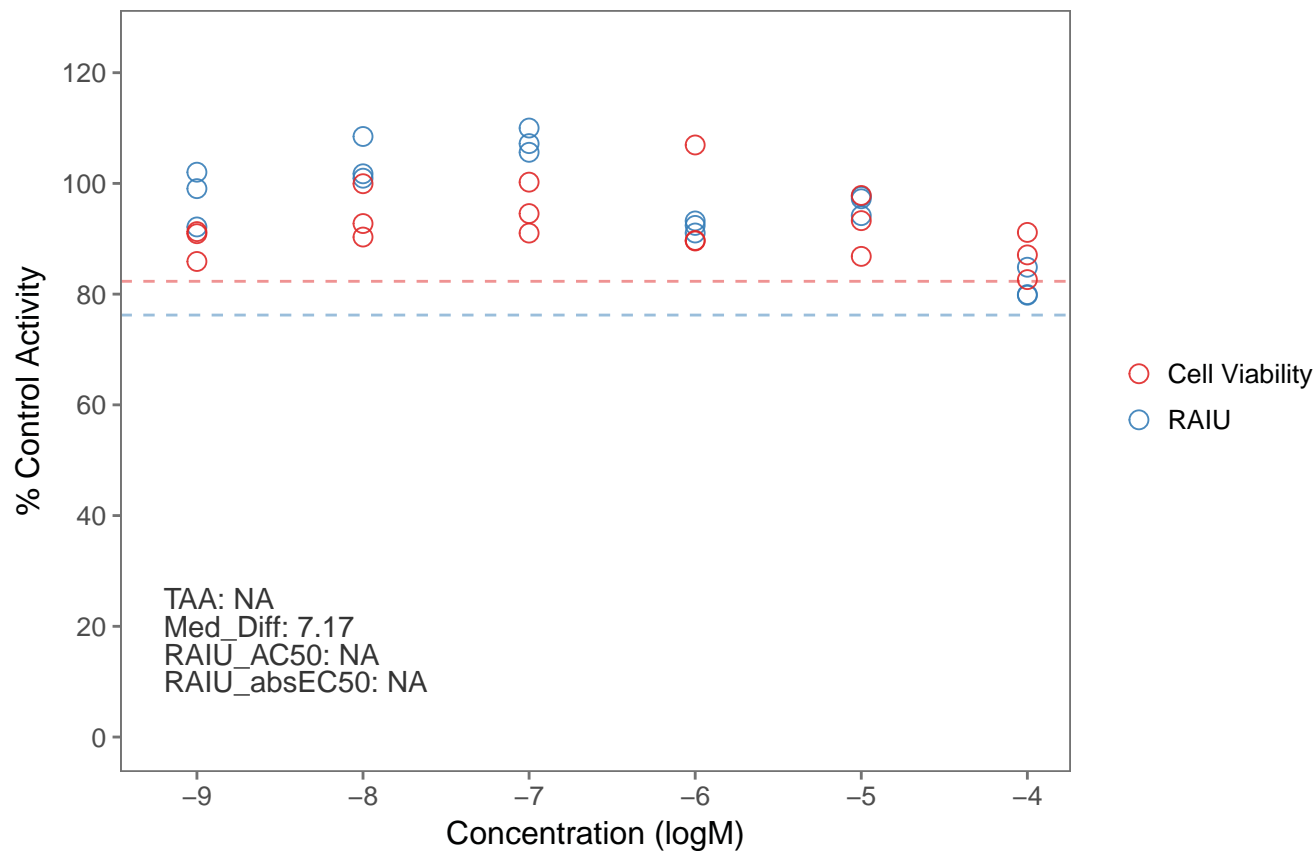

158. SPID: TP0001498G09

NAME: Myclobutanil

CAS NO: 88671-89-0

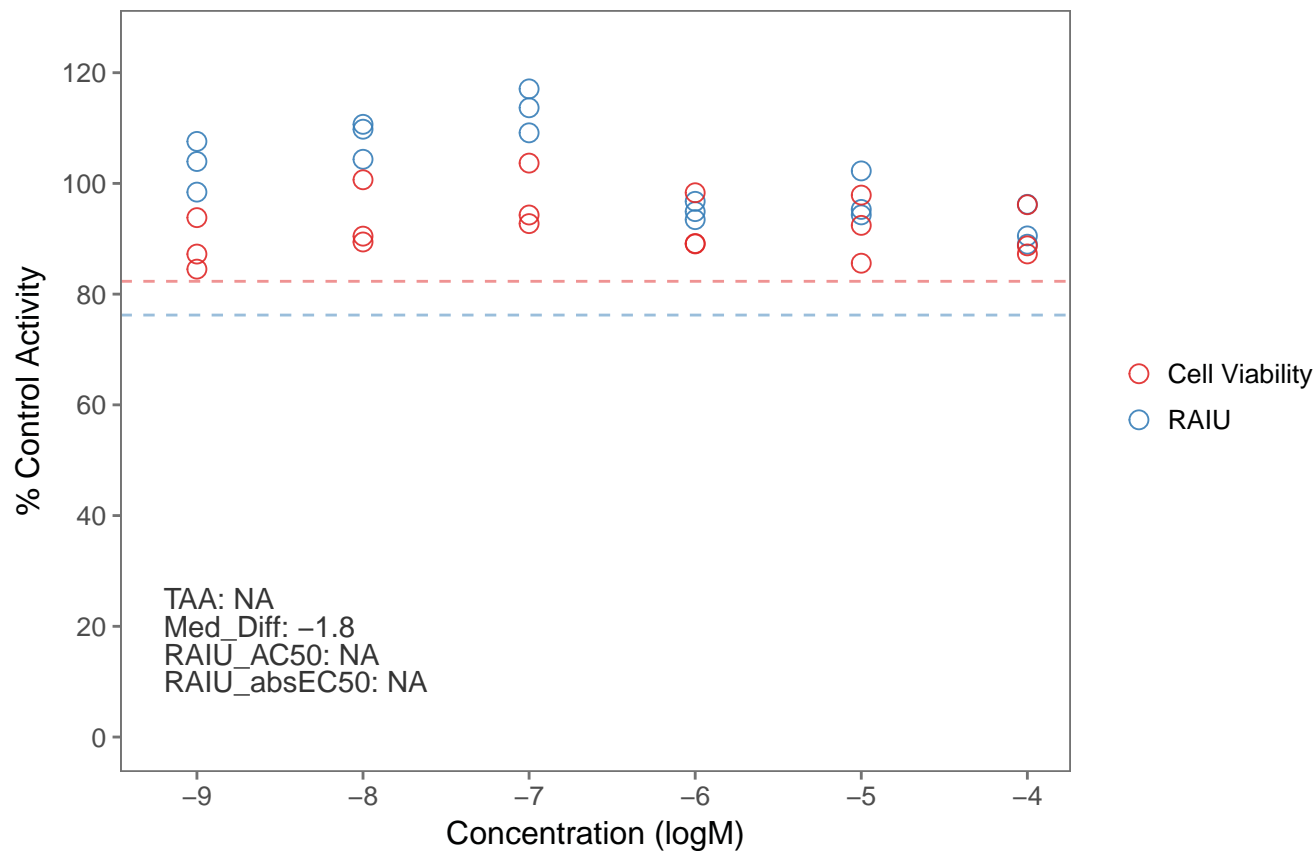

159. SPID: TP0001499B05

NAME: Picloram

CAS NO: 1918-02-1

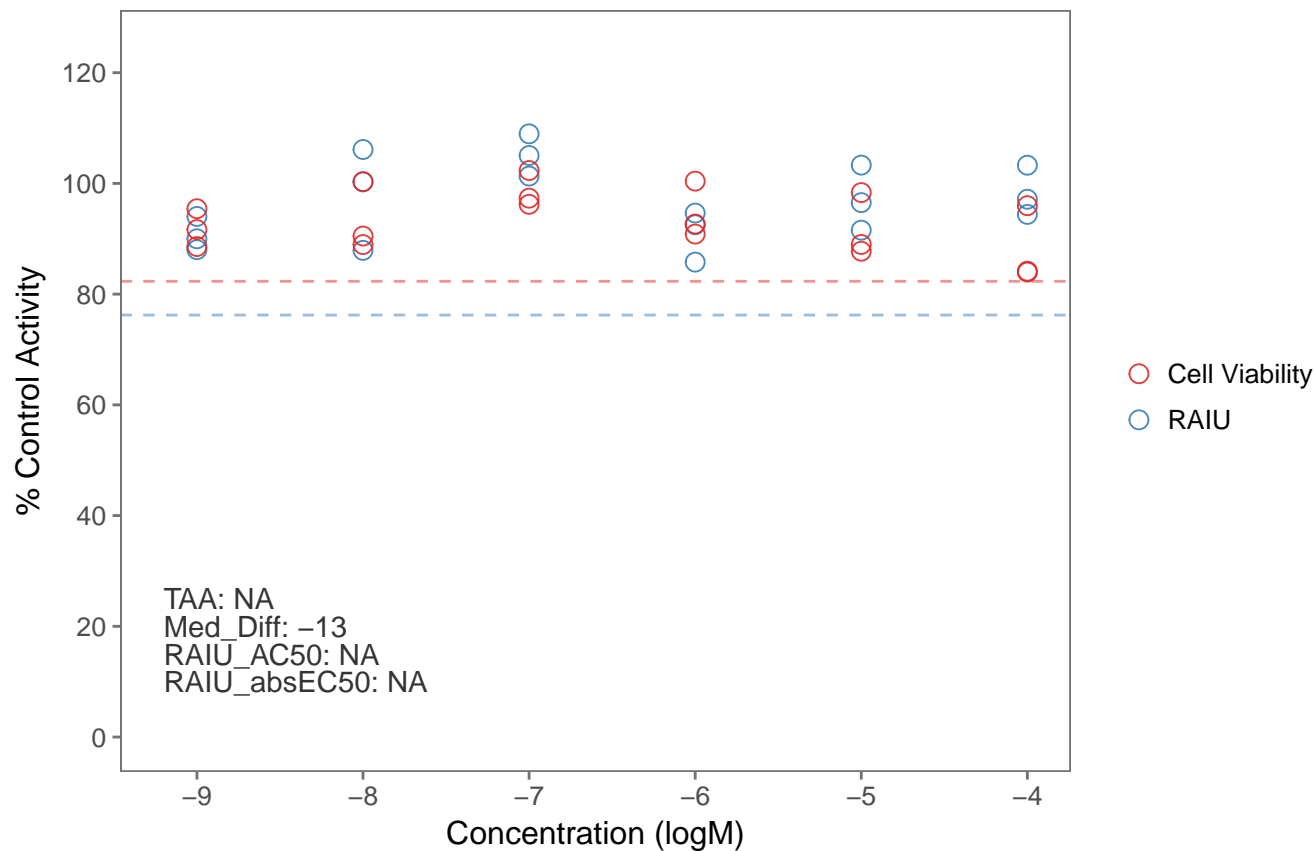

160. SPID: TP0001499B07

NAME: Fludioxonil

CAS NO: 131341-86-1

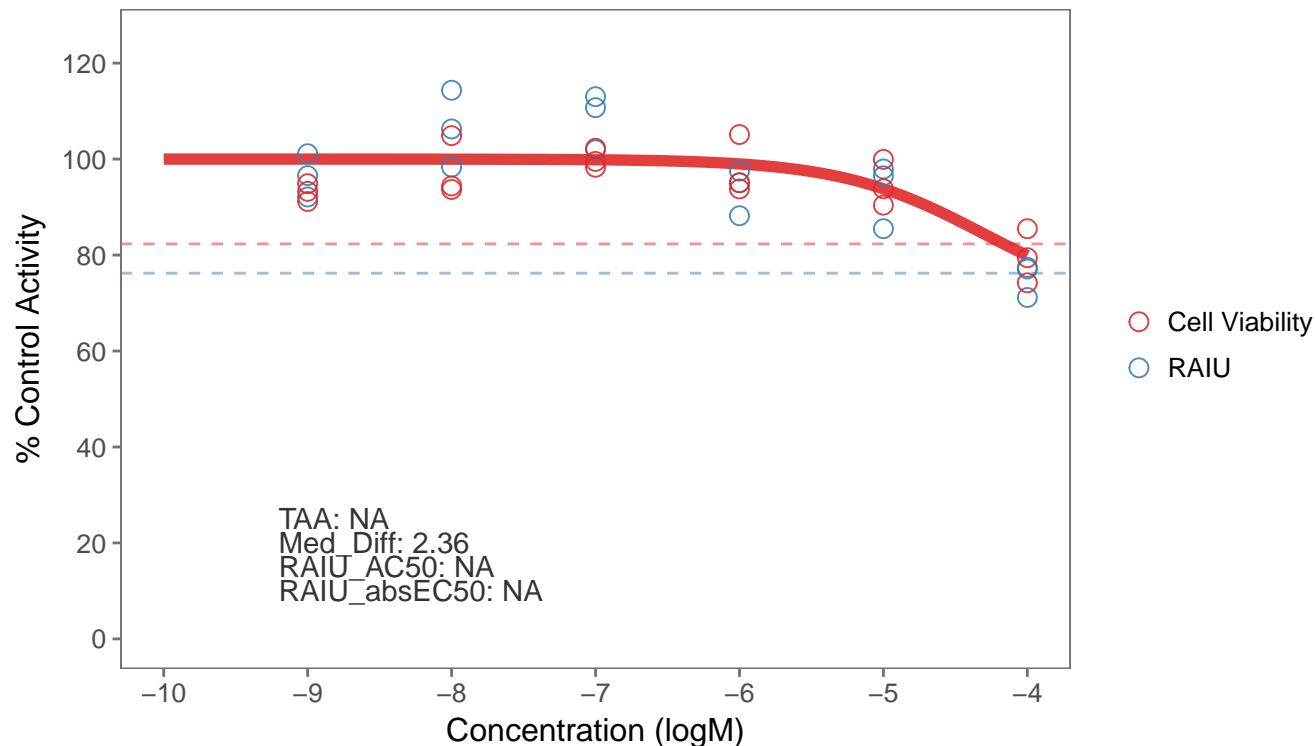

161. SPID: TP0001499E02

NAME: Resmethrin

CAS NO: 10453-86-8

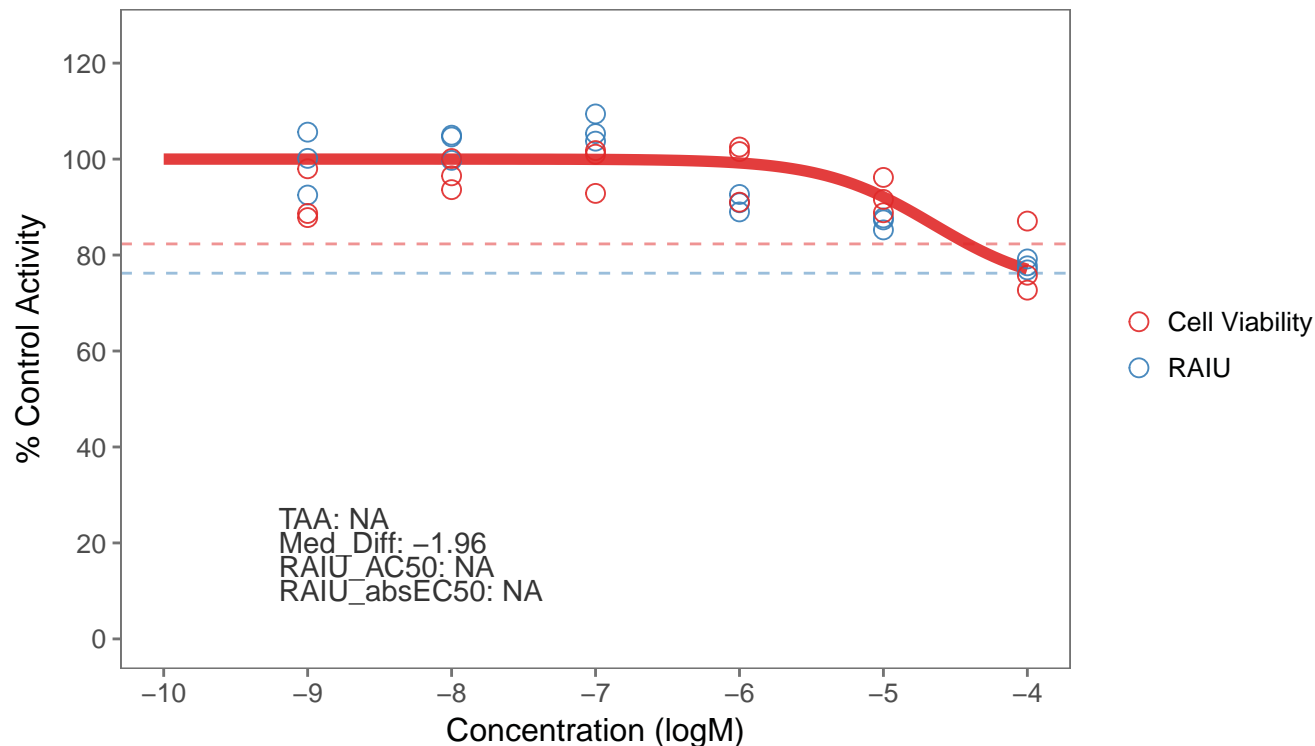

162. SPID: TP0001499E03

NAME: Fenpropathrin

CAS NO: 39515-41-8

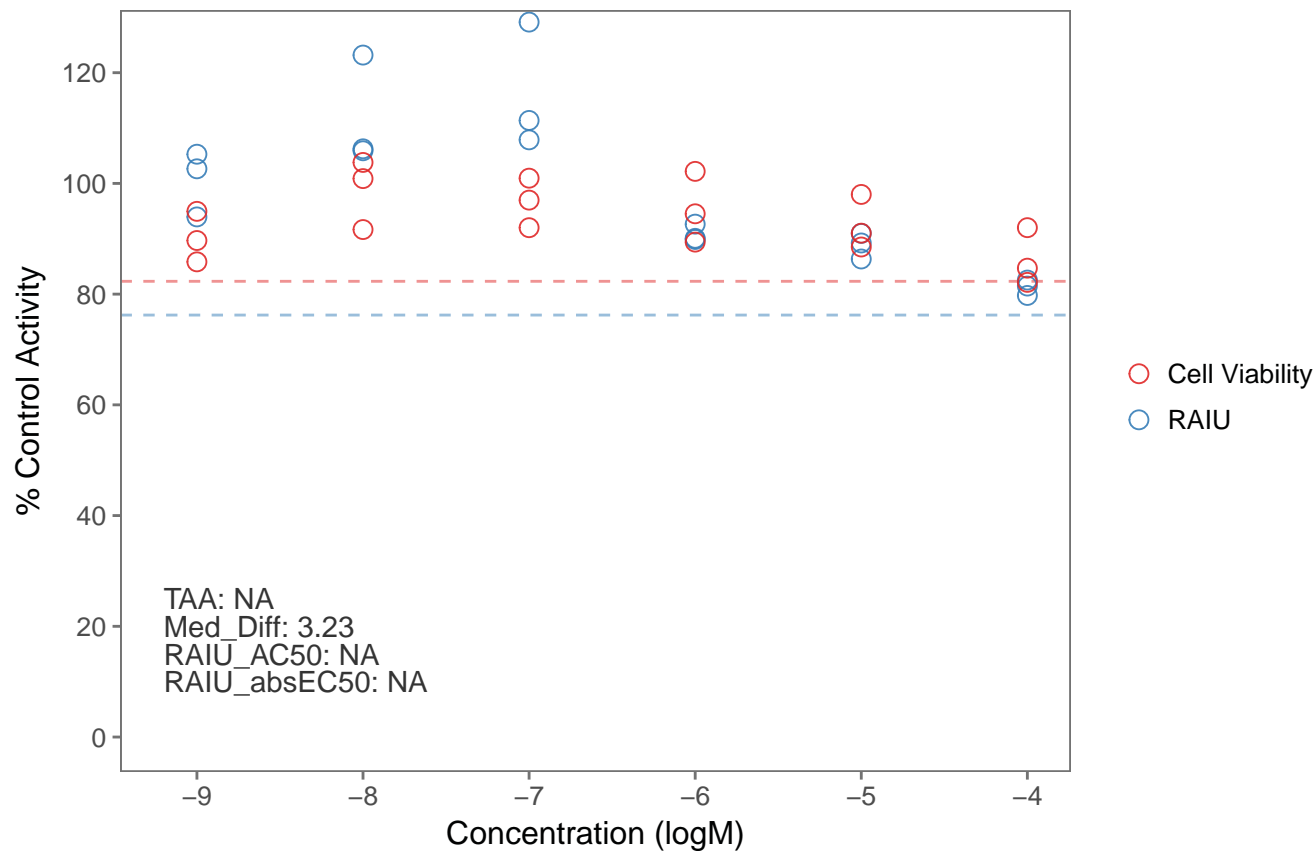

163. SPID: TP0001501A01

NAME: Tralkoxydim

CAS NO: 87820-88-0

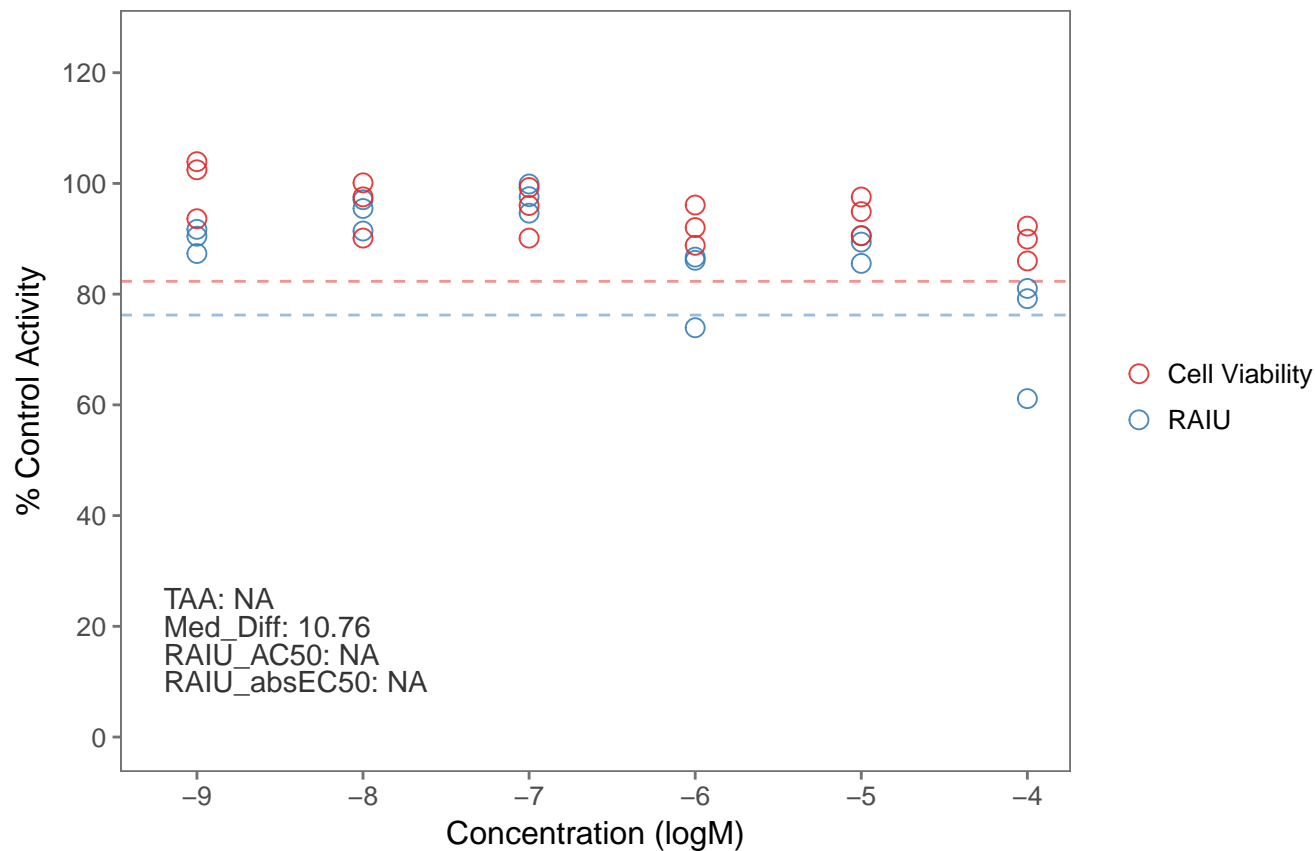



164. SPID: TP0001501B05

NAME: Flufenpyr-ethyl

CAS NO: 188489-07-8

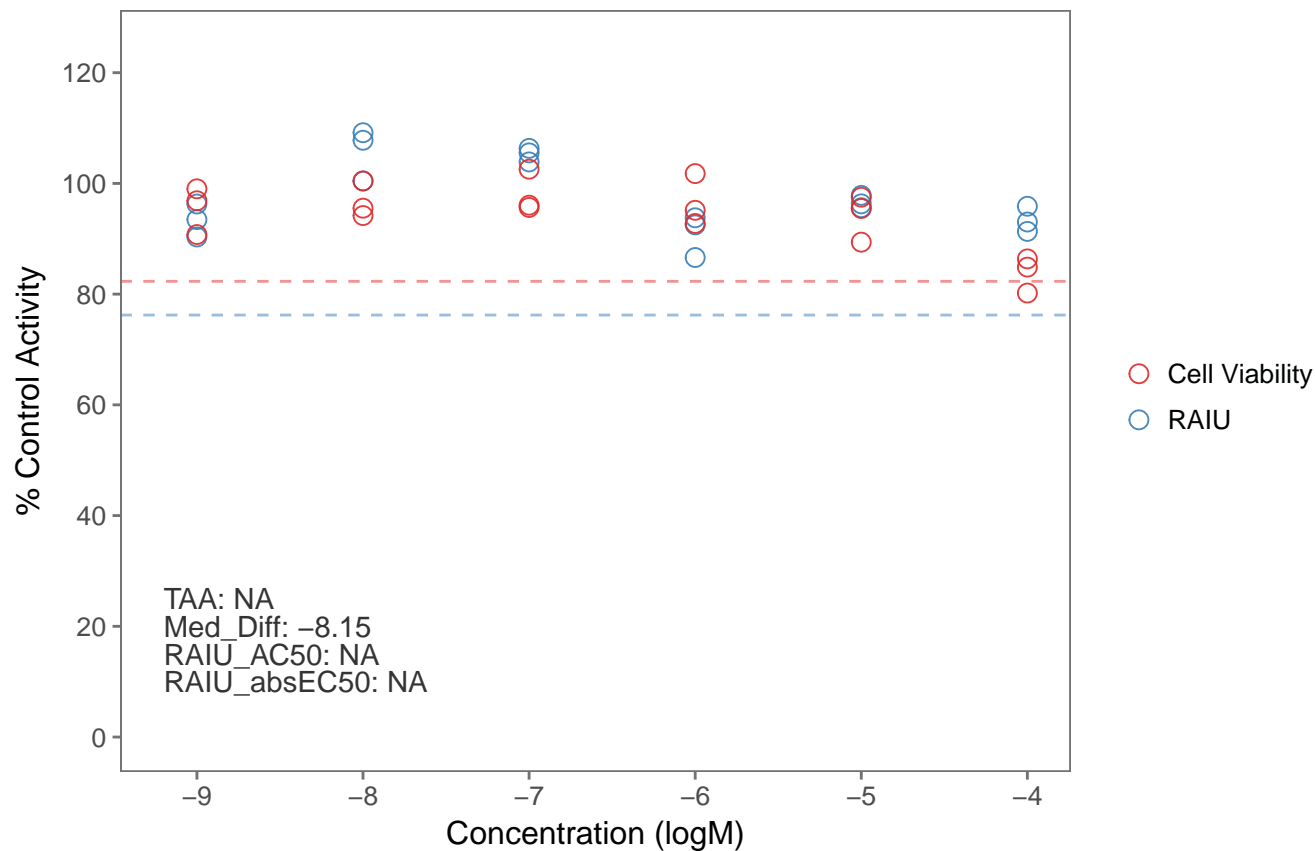

165. SPID: TP0001501B08

NAME: Fenhexamid

CAS NO: 126833-17-8

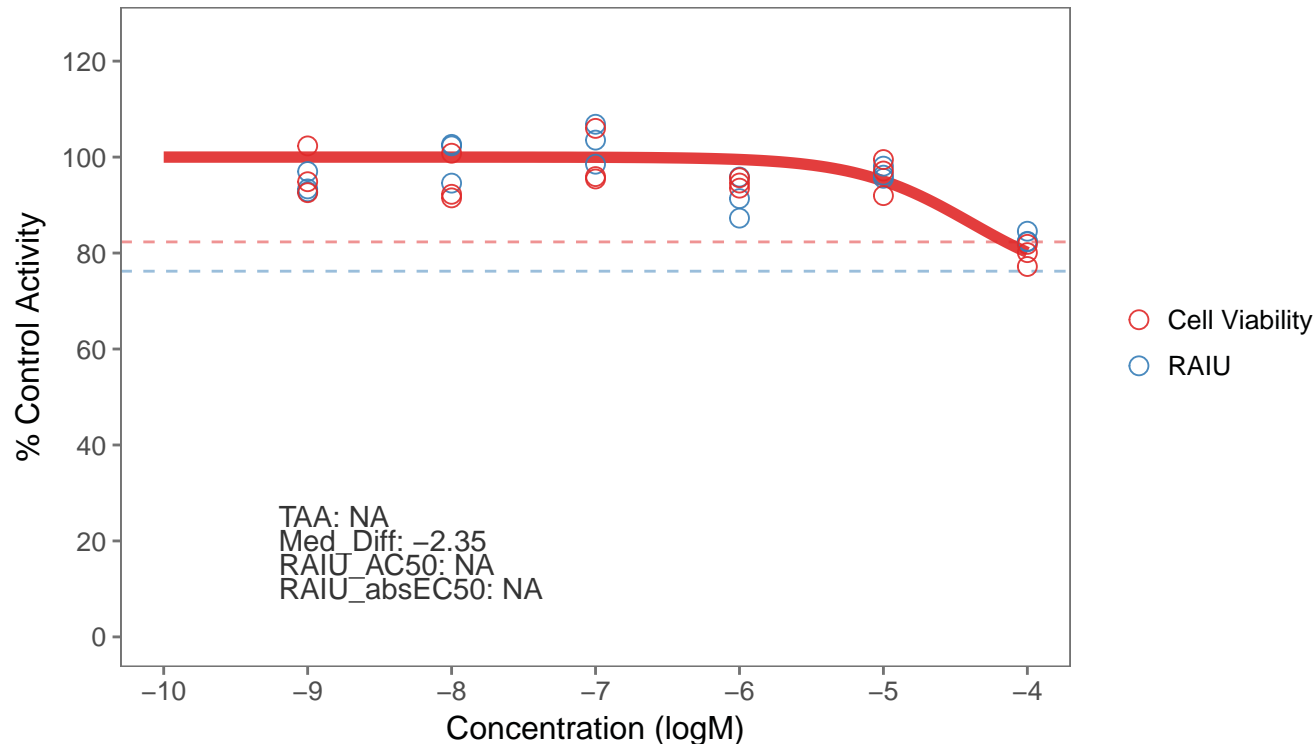

166. SPID: TP0001501B11

NAME: Cycloate

CAS NO: 1134-23-2

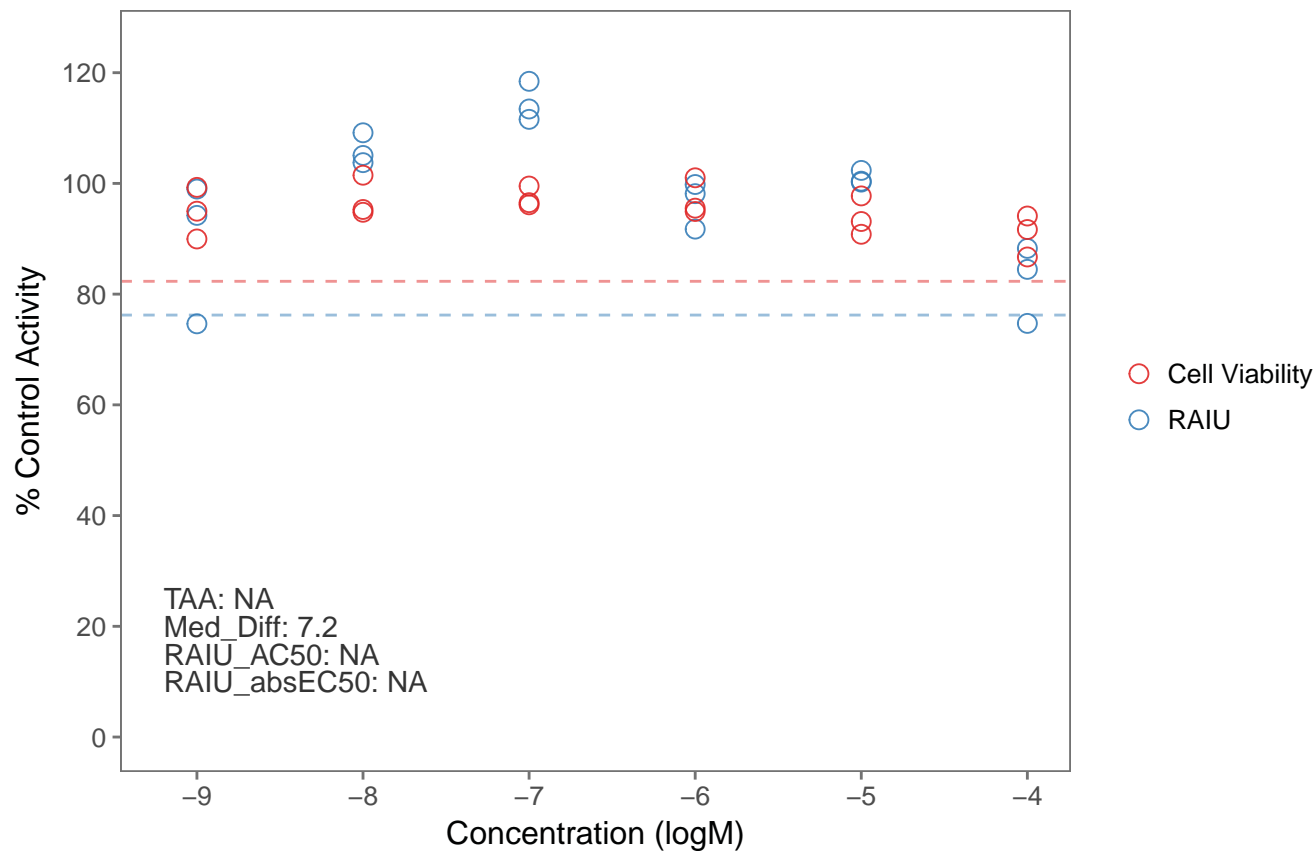

167. SPID: TP0001501C01  
NAME: Pyraflufen-ethyl  
CAS NO: 129630-19-9

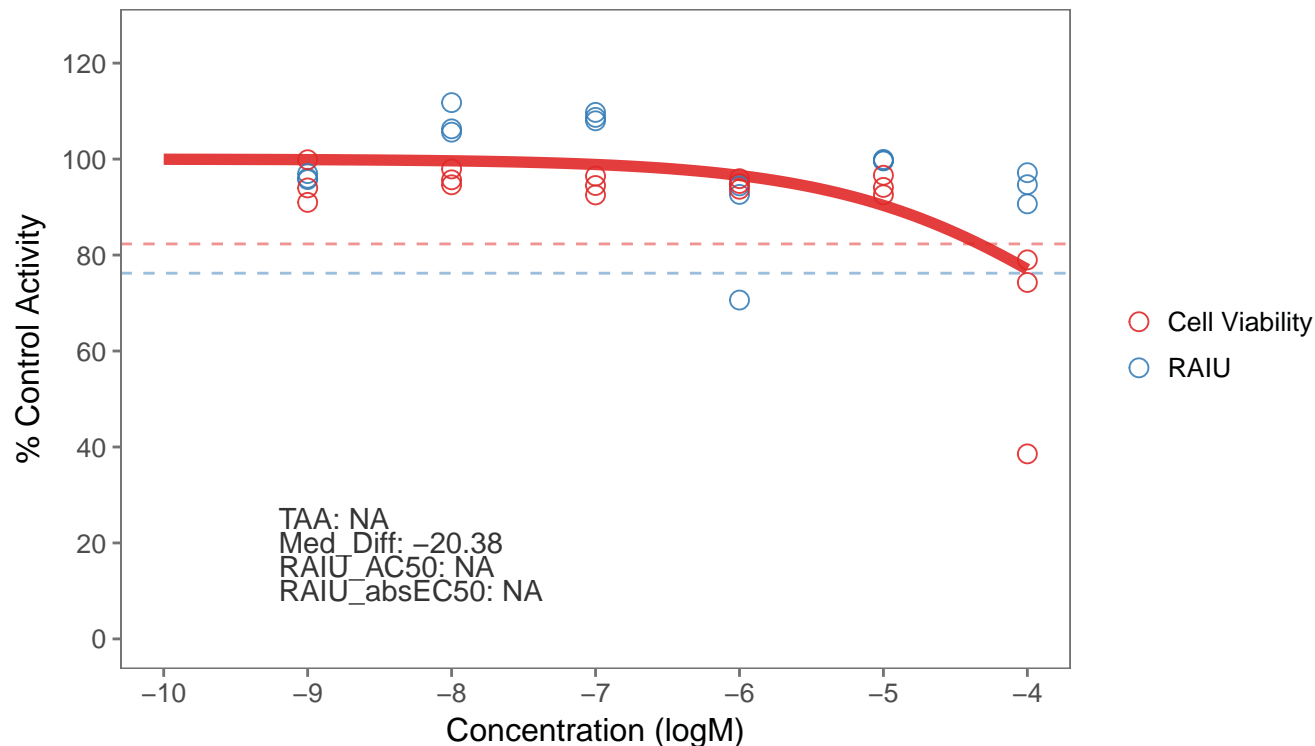

168. SPID: TP0001501C03

NAME: Vinclozolin

CAS NO: 50471-44-8

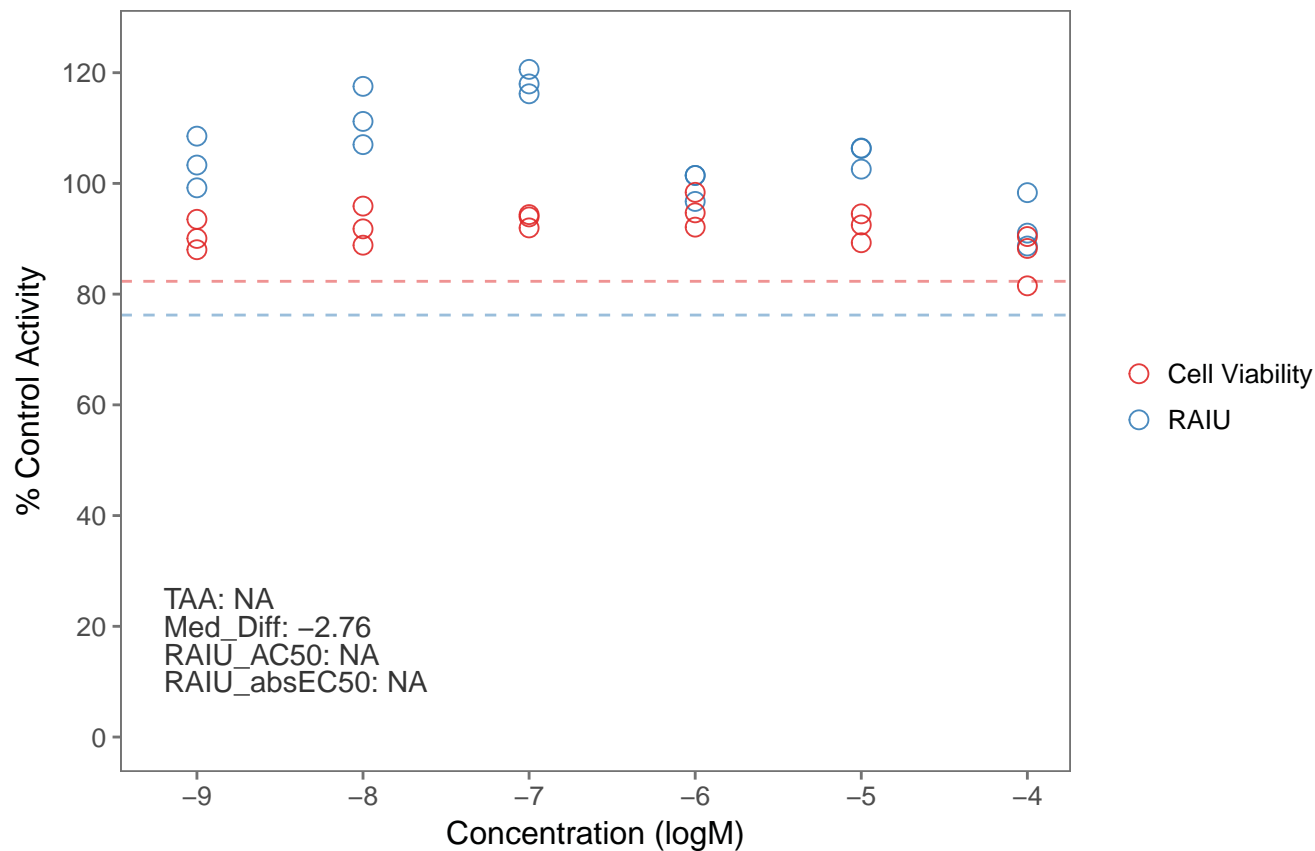

169. SPID: TP0001501D05

NAME: Chlorpyrifos oxon

CAS NO: 5598-15-2

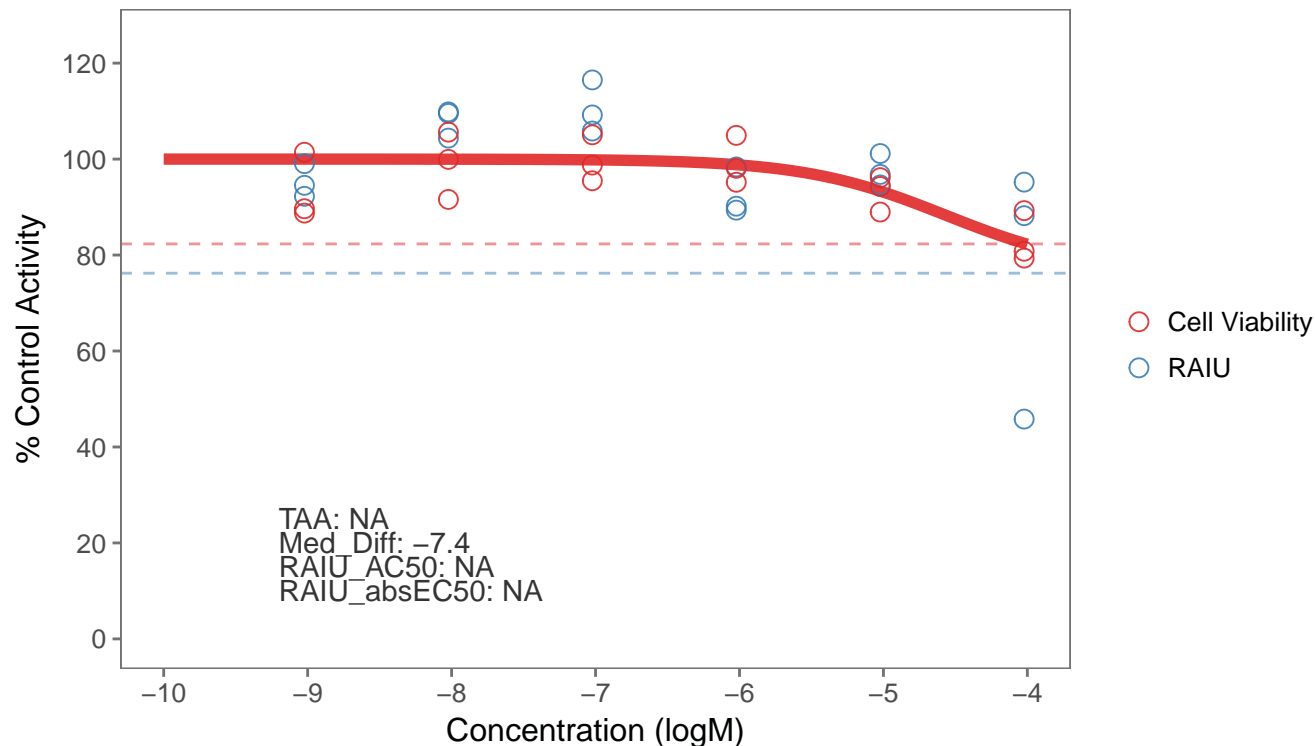

**Part IV. Dose-response of sodium perchlorate and DCNQ positive controls in multi-concentration screening**

1 . SPID: NaClO4\_Plate\_1\_rep1

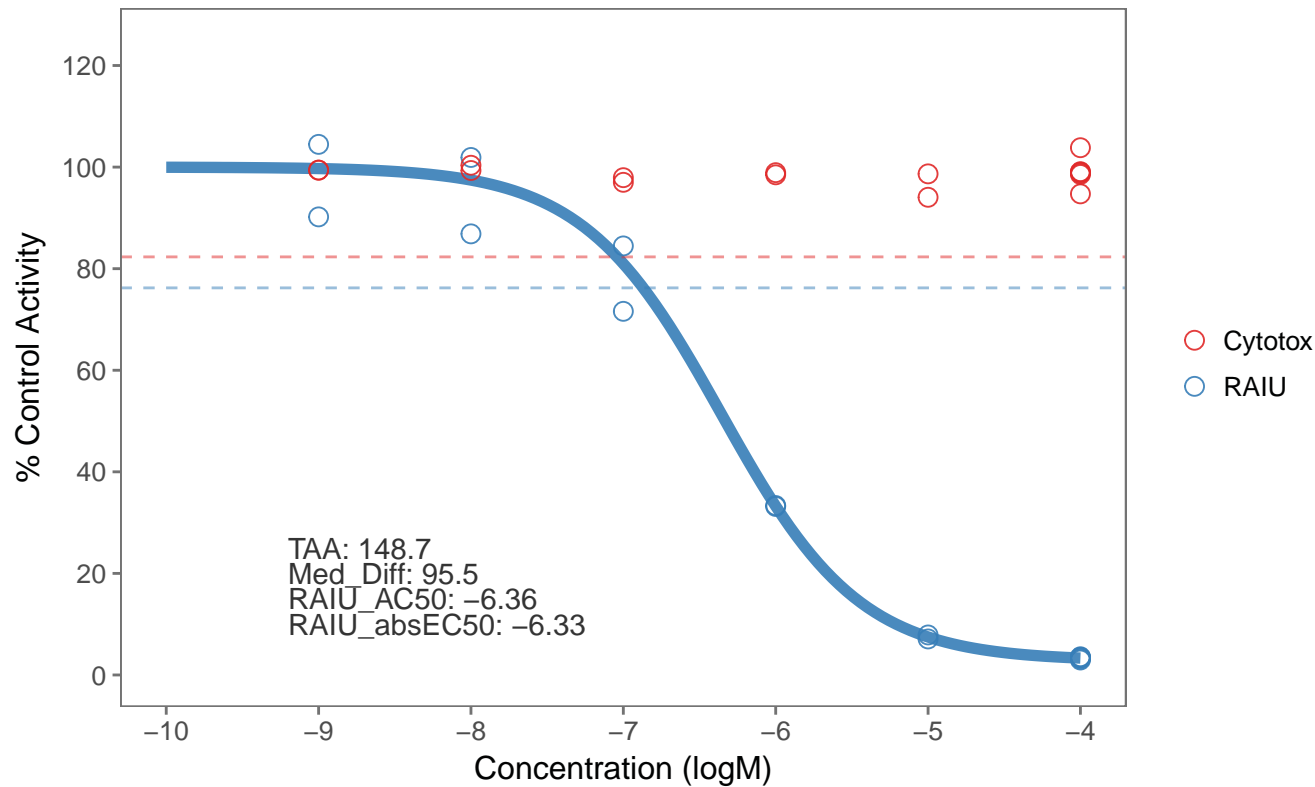



## 2 . SPID: NaClO4\_Plate\_1\_rep2

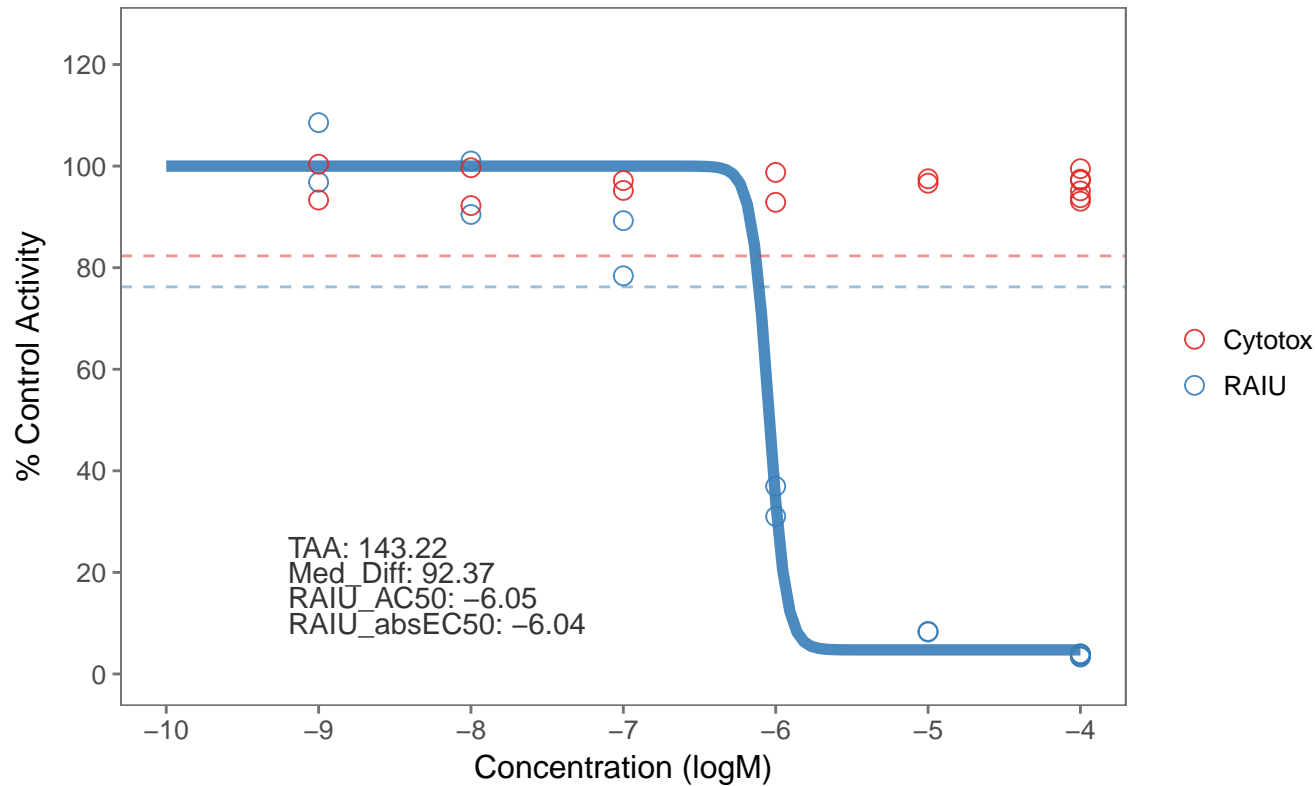

### 3 . SPID: NaClO4\_Plate\_1\_rep3

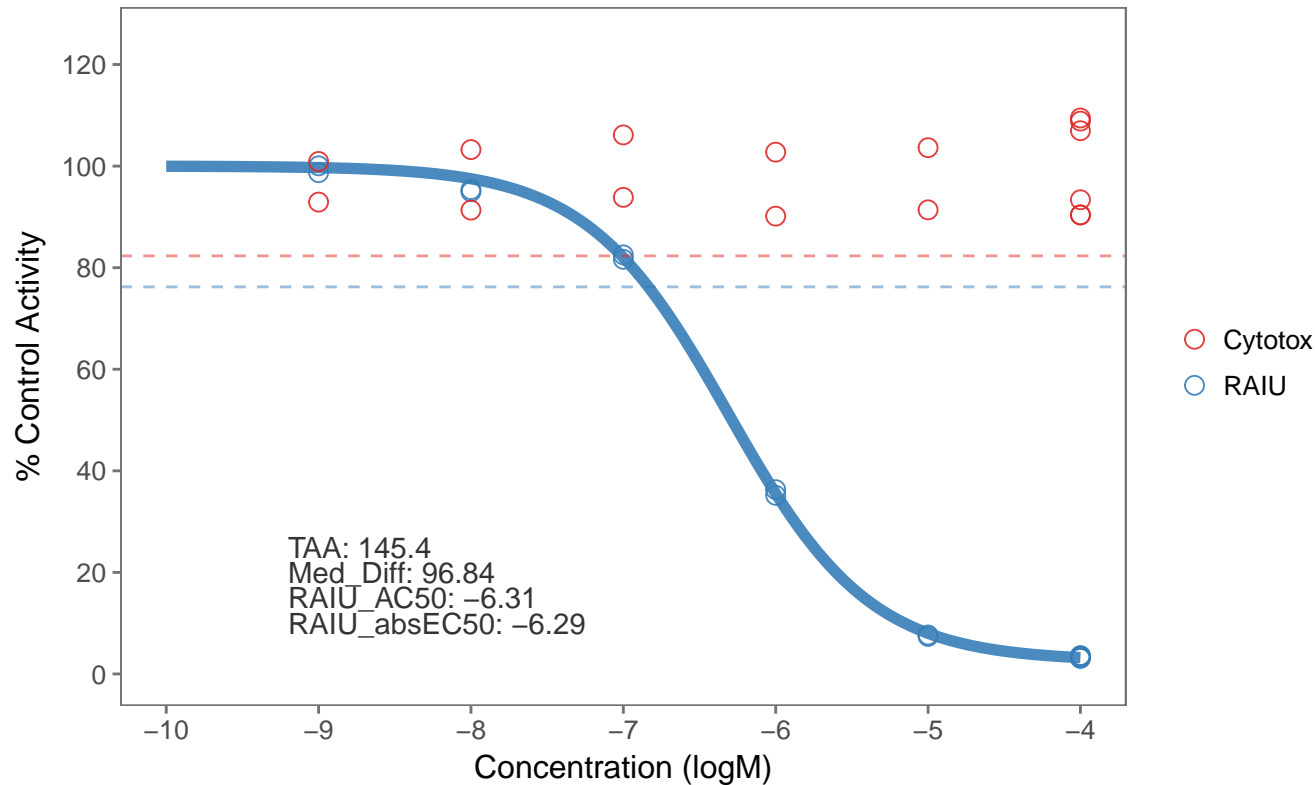

### 4 . SPID: NaClO4\_Plate\_10\_rep1

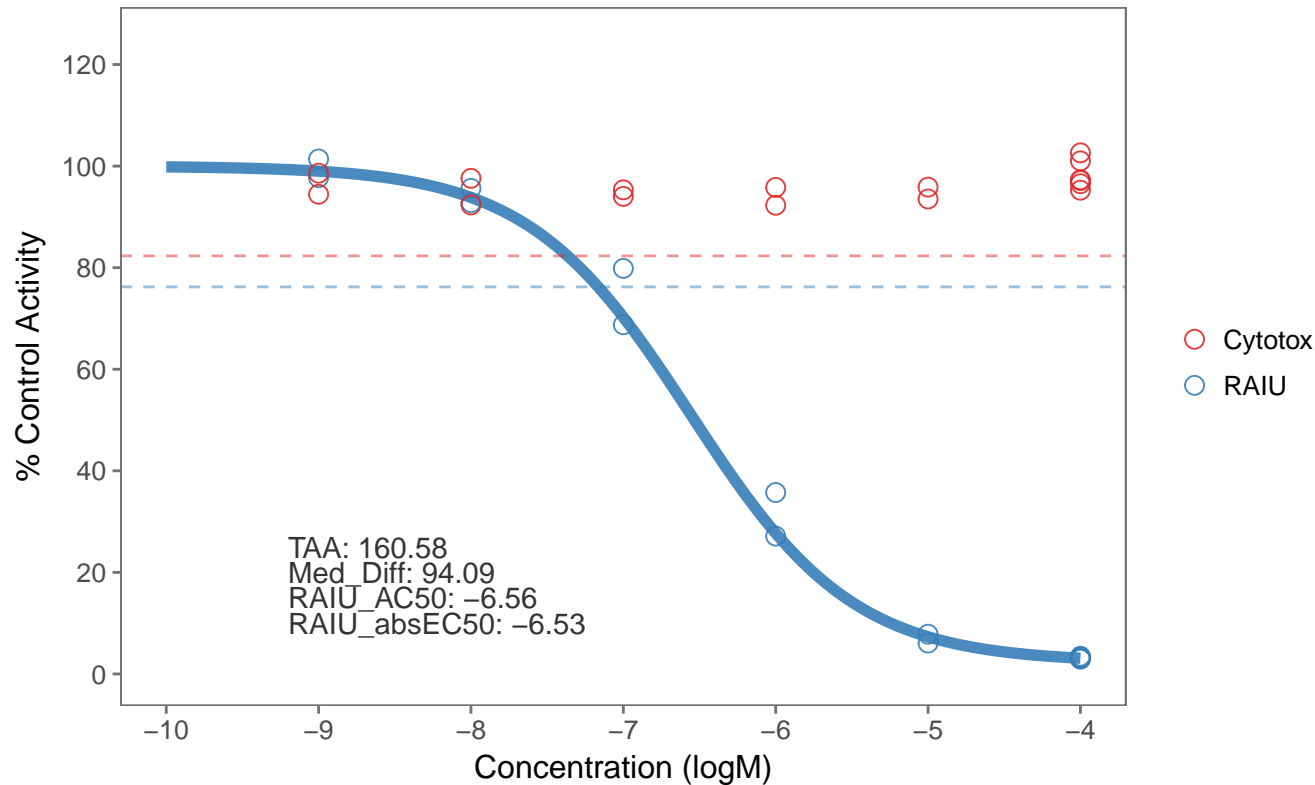

5 . SPID: NaClO4\_Plate\_10\_rep2

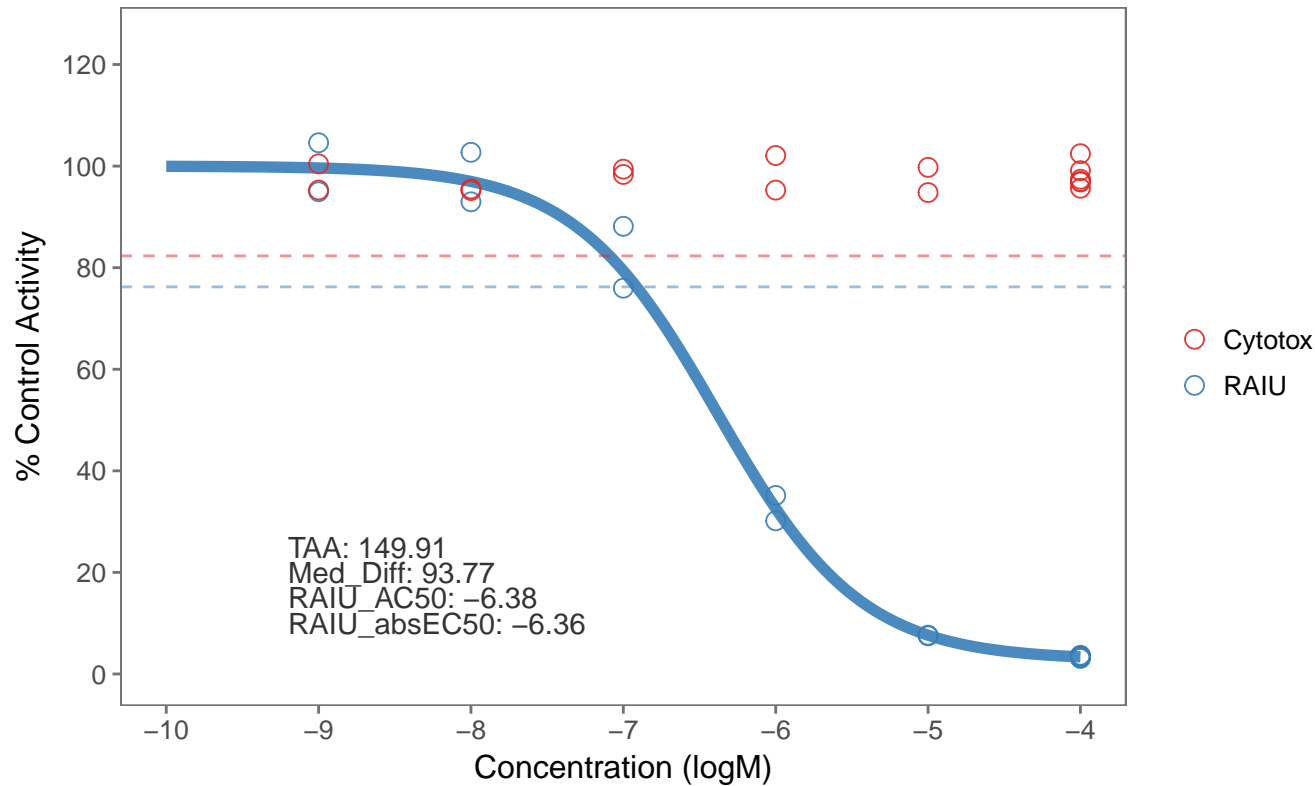

6 . SPID: NaClO4\_Plate\_10\_rep3

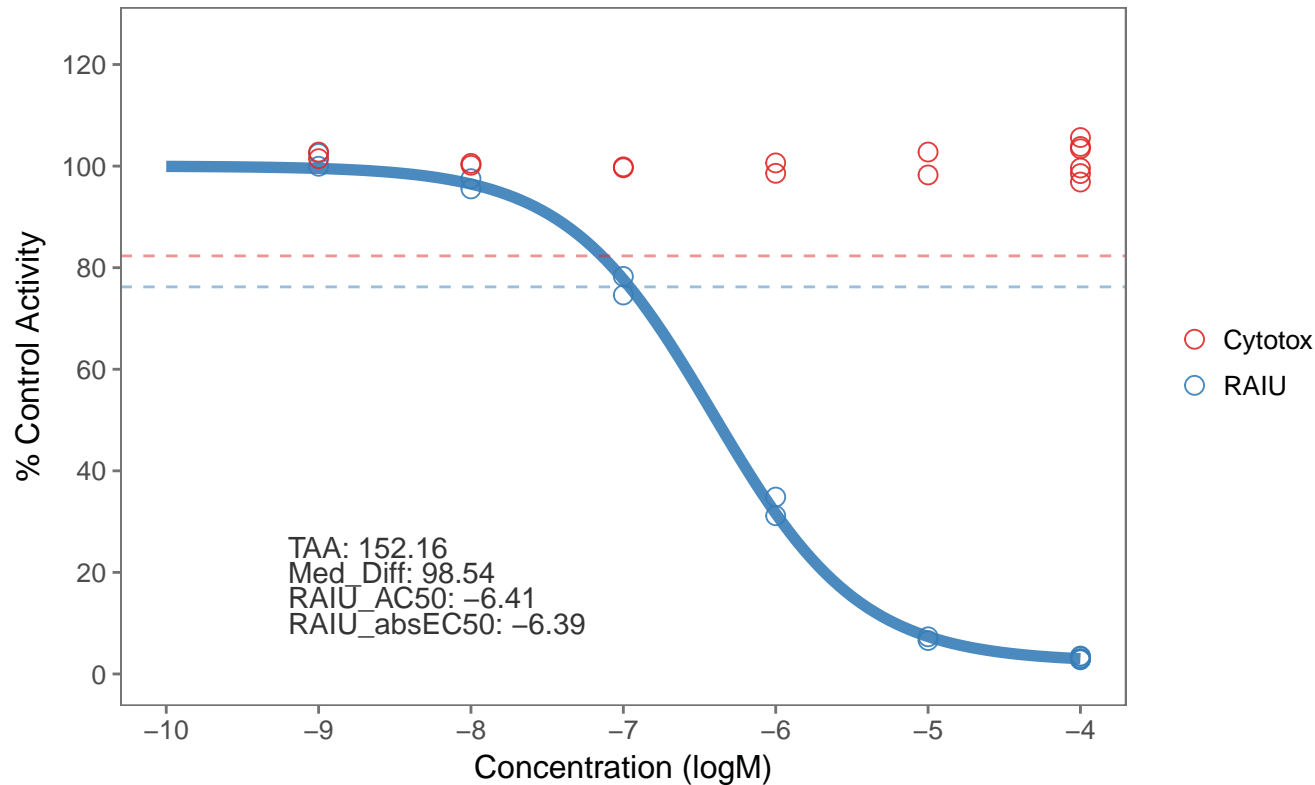

### 7 . SPID: NaClO4\_Plate\_11\_rep1

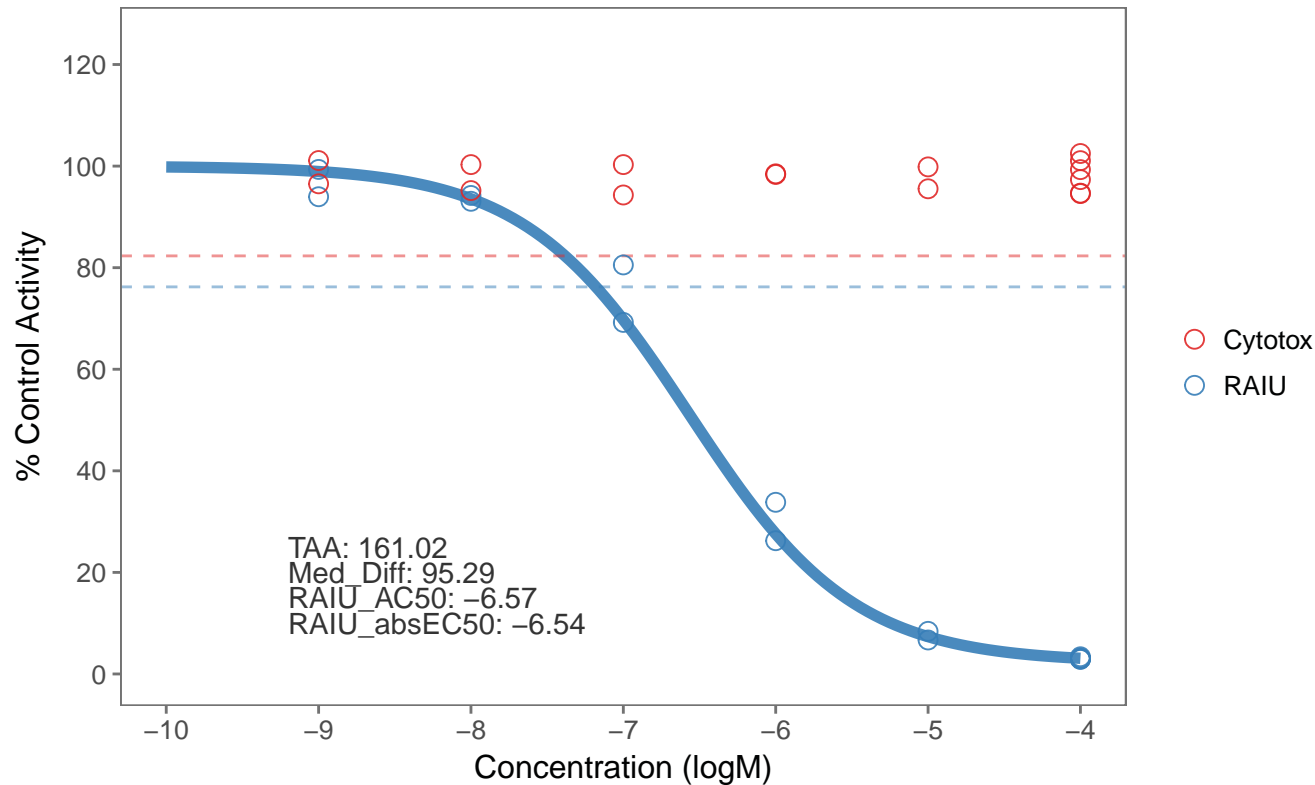

8 . SPID: NaClO4\_Plate\_11\_rep2

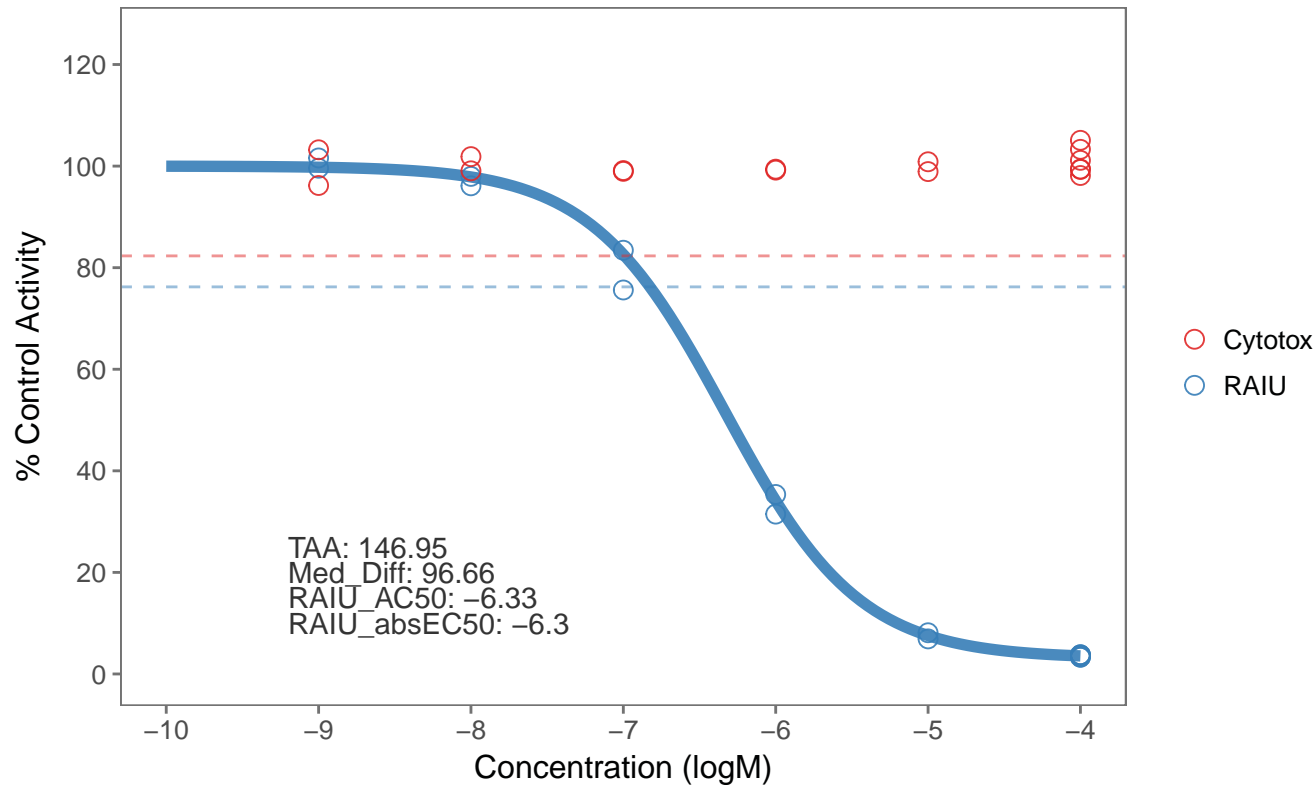

### 9 . SPID: NaClO4\_Plate\_11\_rep3

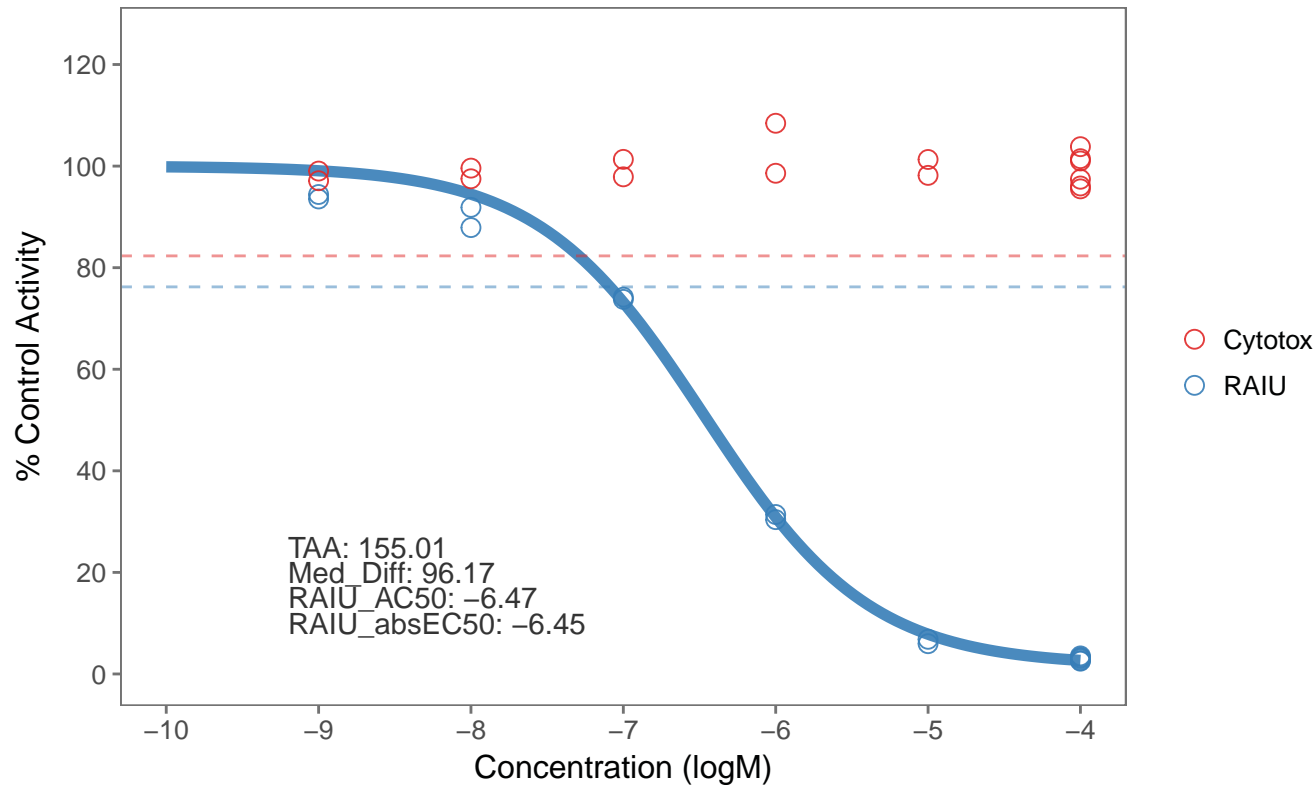



10 . SPID: NaClO4\_Plate\_12\_rep1

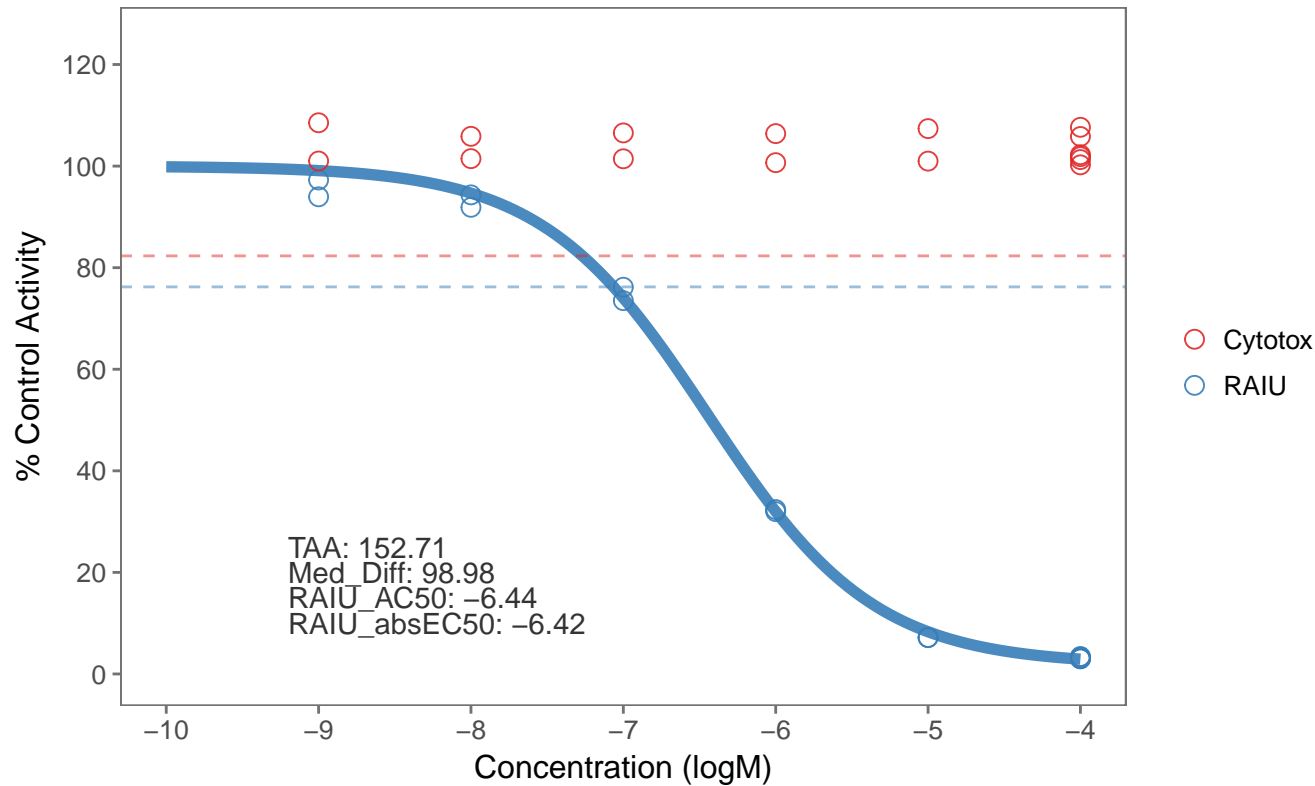

### 11 . SPID: NaClO4\_Plate\_12\_rep2

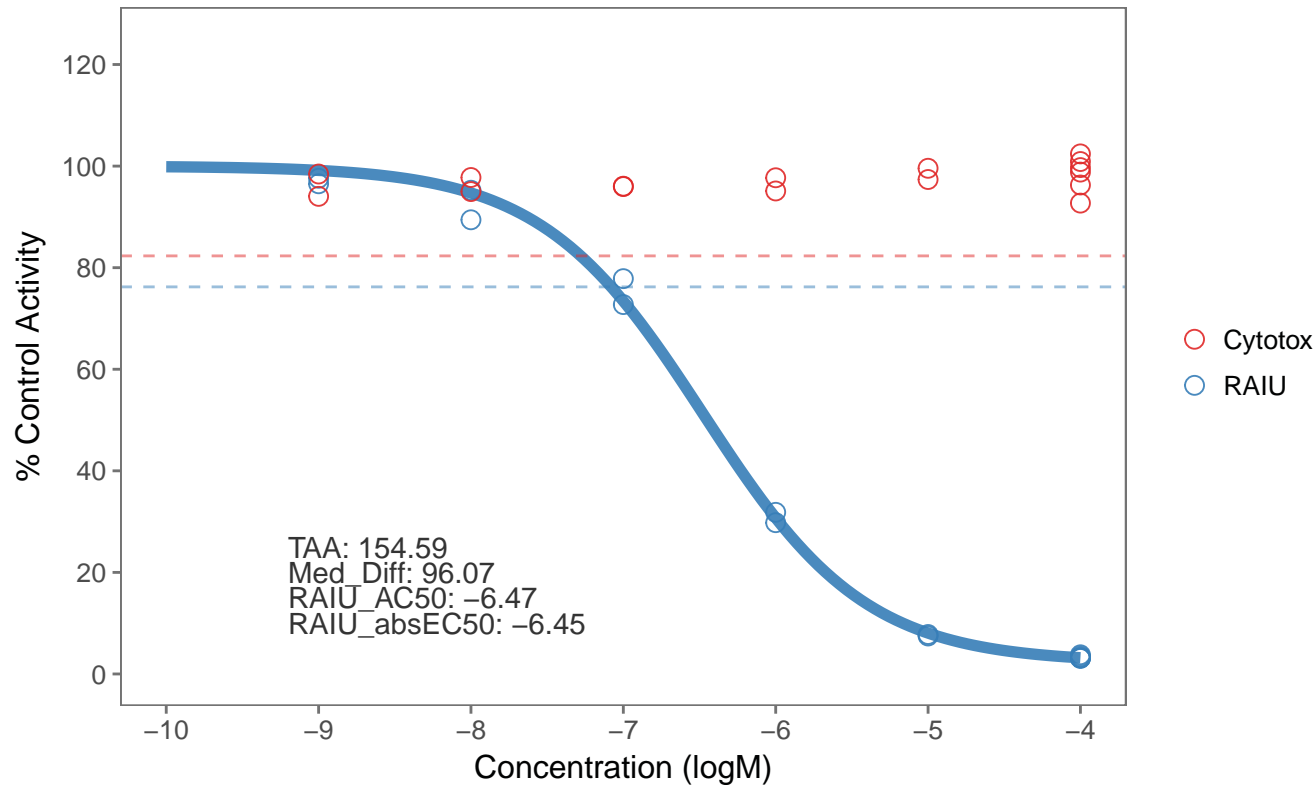

### 12 . SPID: NaClO4\_Plate\_12\_rep3

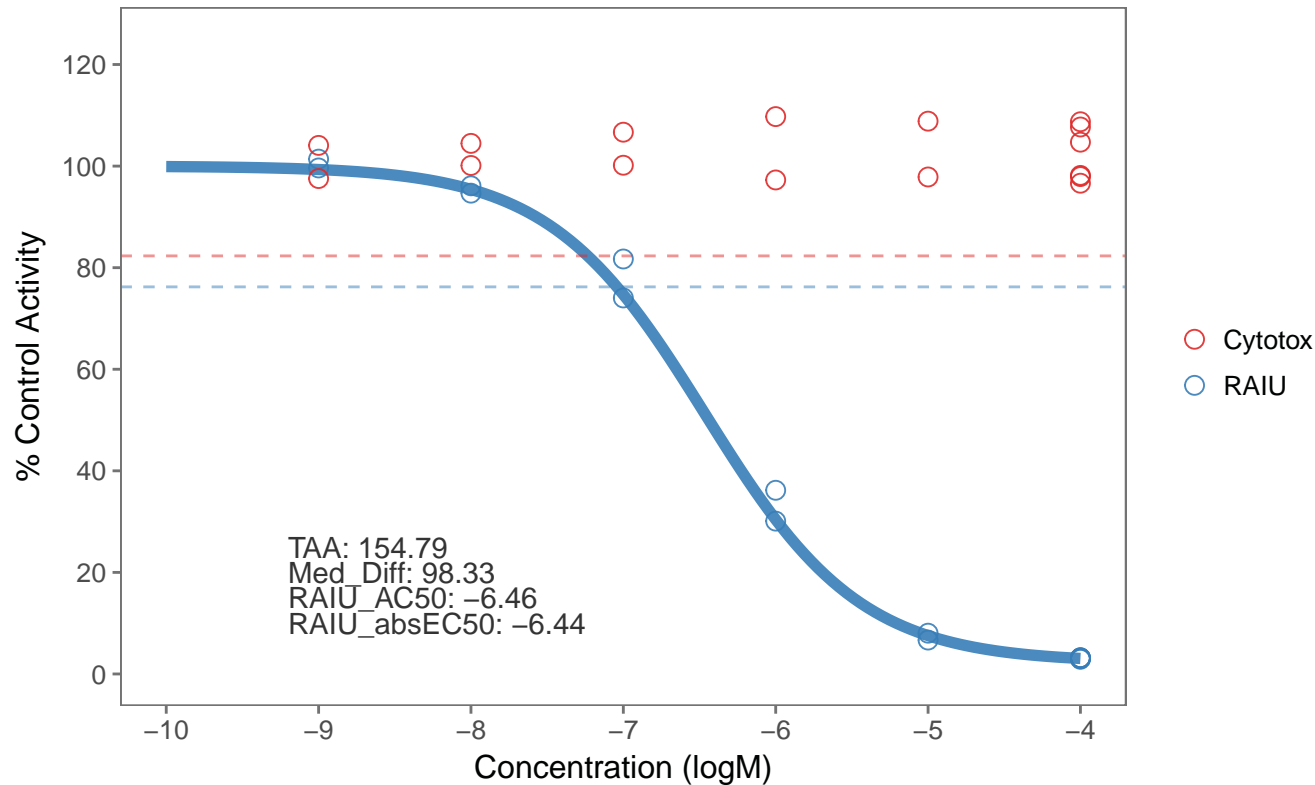

13 . SPID: NaClO4\_Plate\_13\_rep1

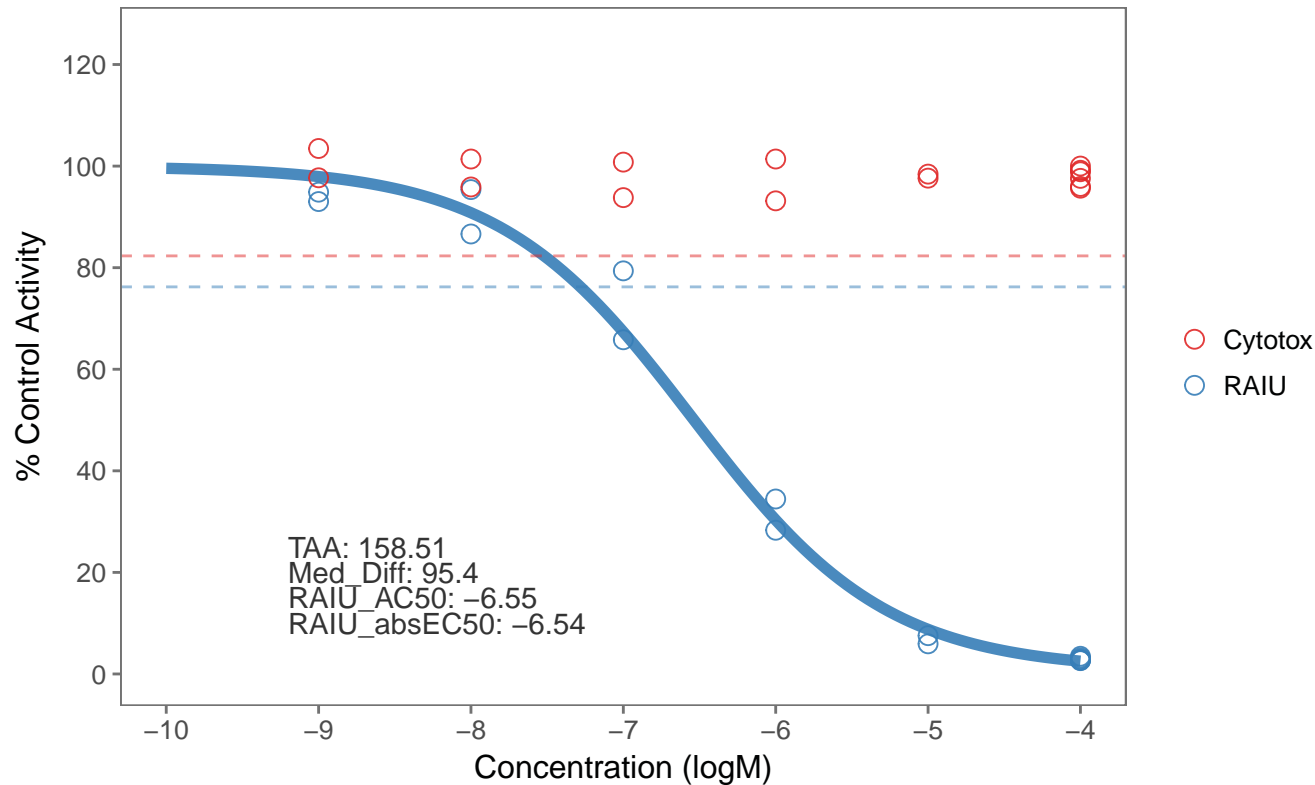

### 14 . SPID: NaClO4\_Plate\_13\_rep2

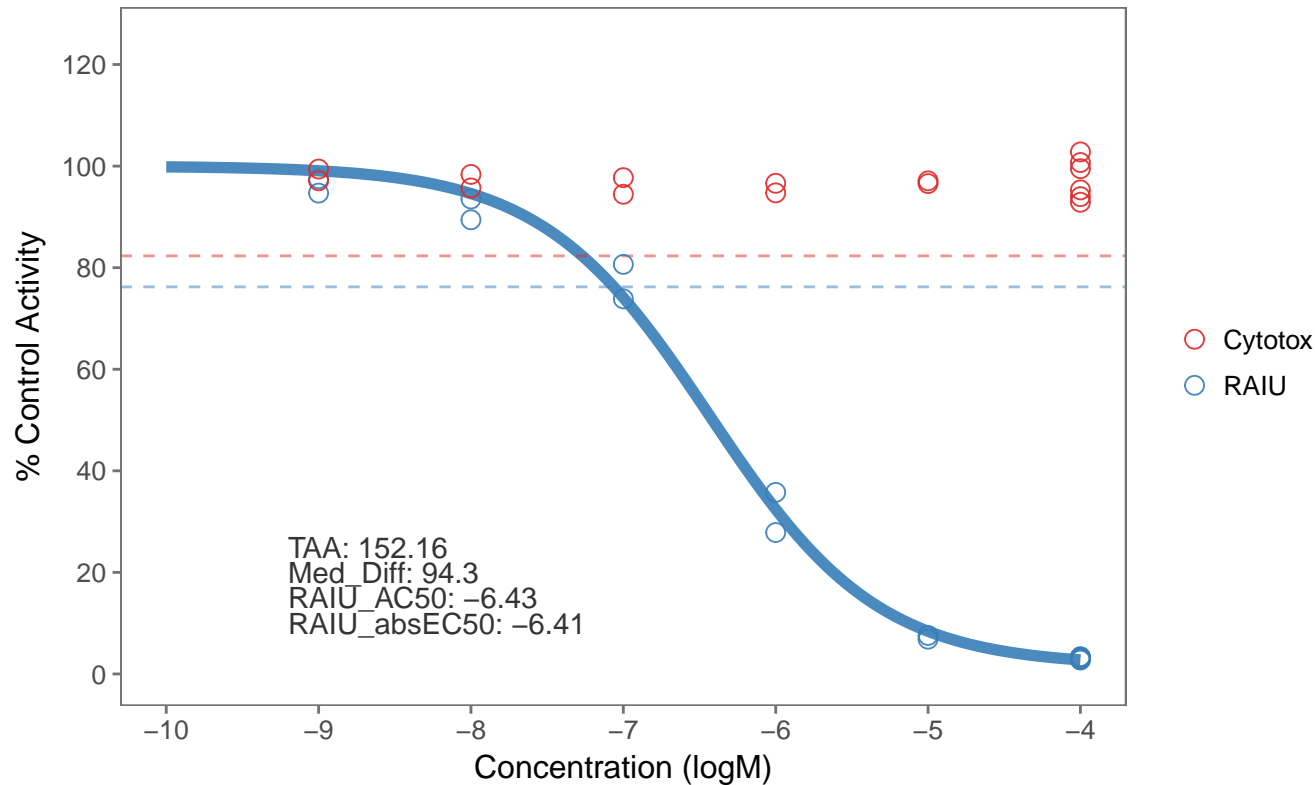

### 15 . SPID: NaClO4\_Plate\_13\_rep3

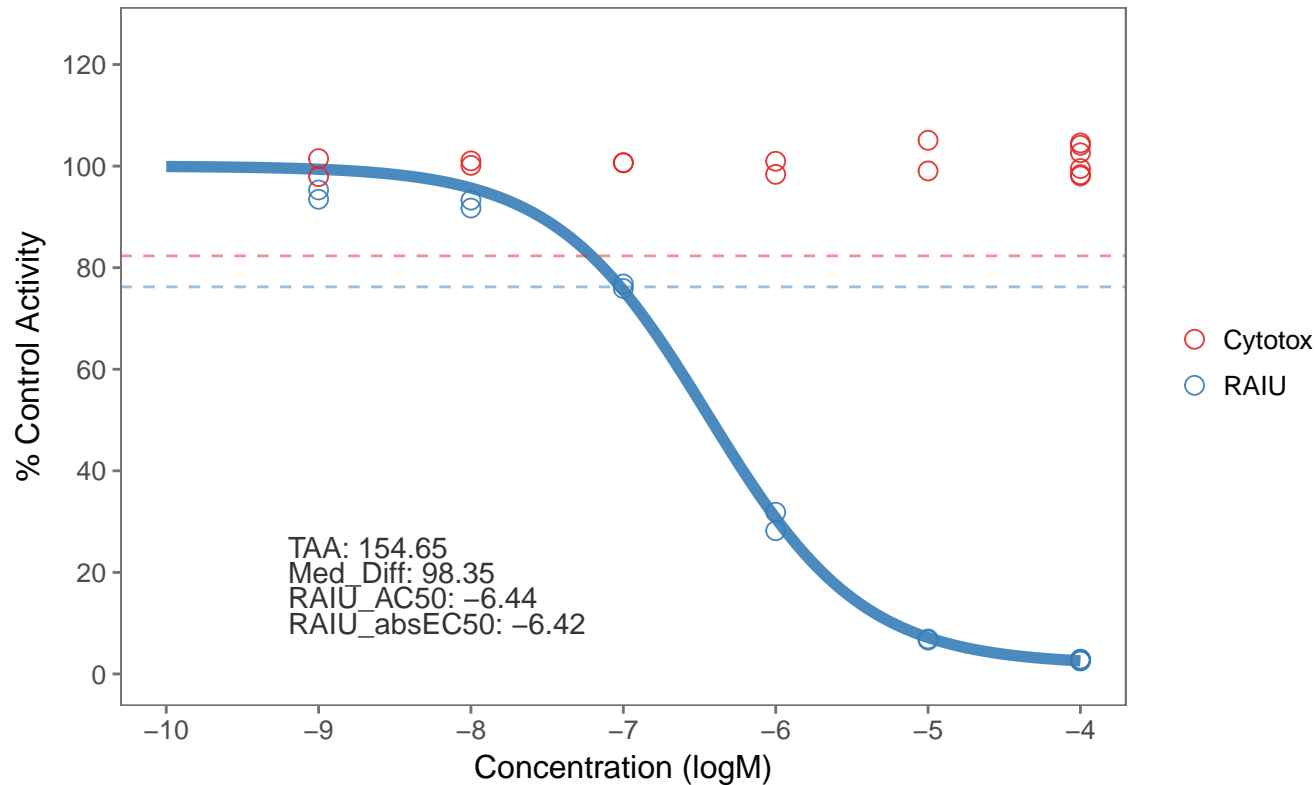

16 . SPID: NaClO4\_Plate\_14\_rep1

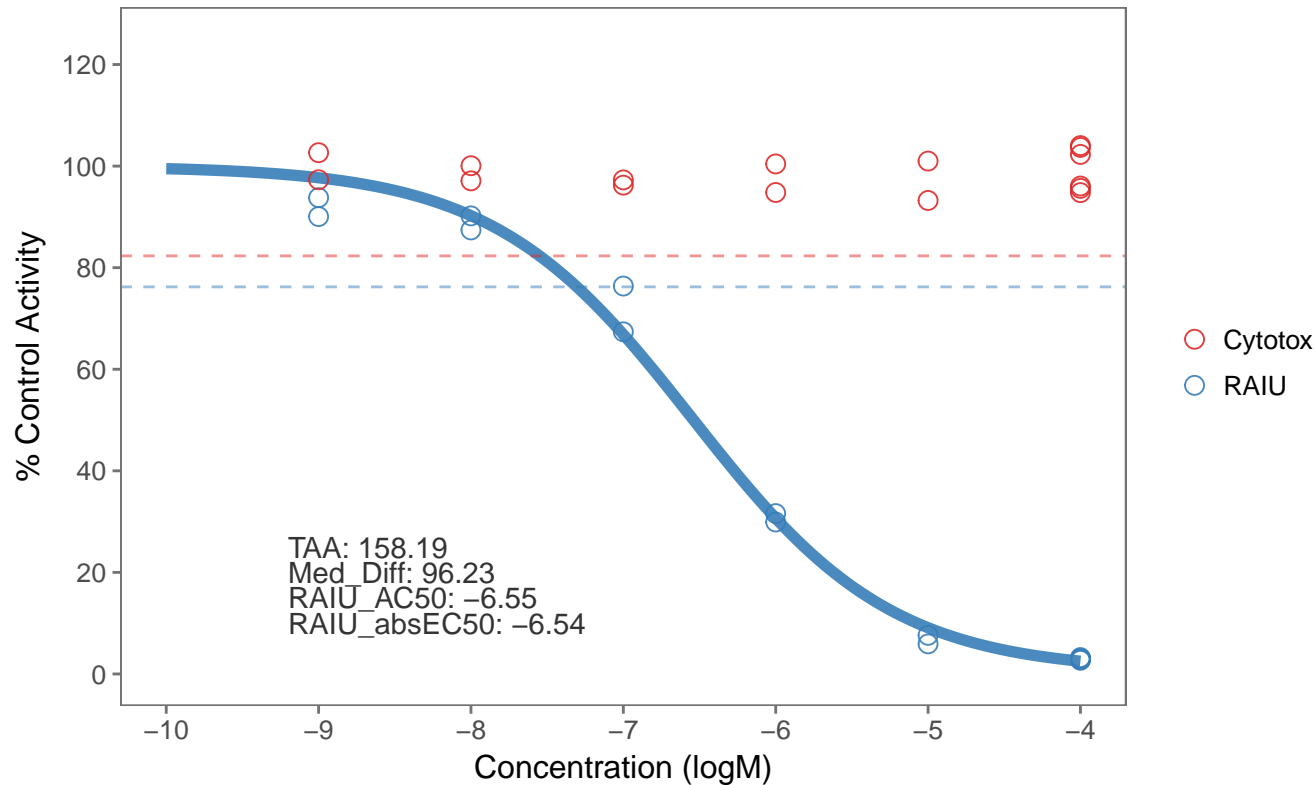

17 . SPID: NaClO4\_Plate\_14\_rep2

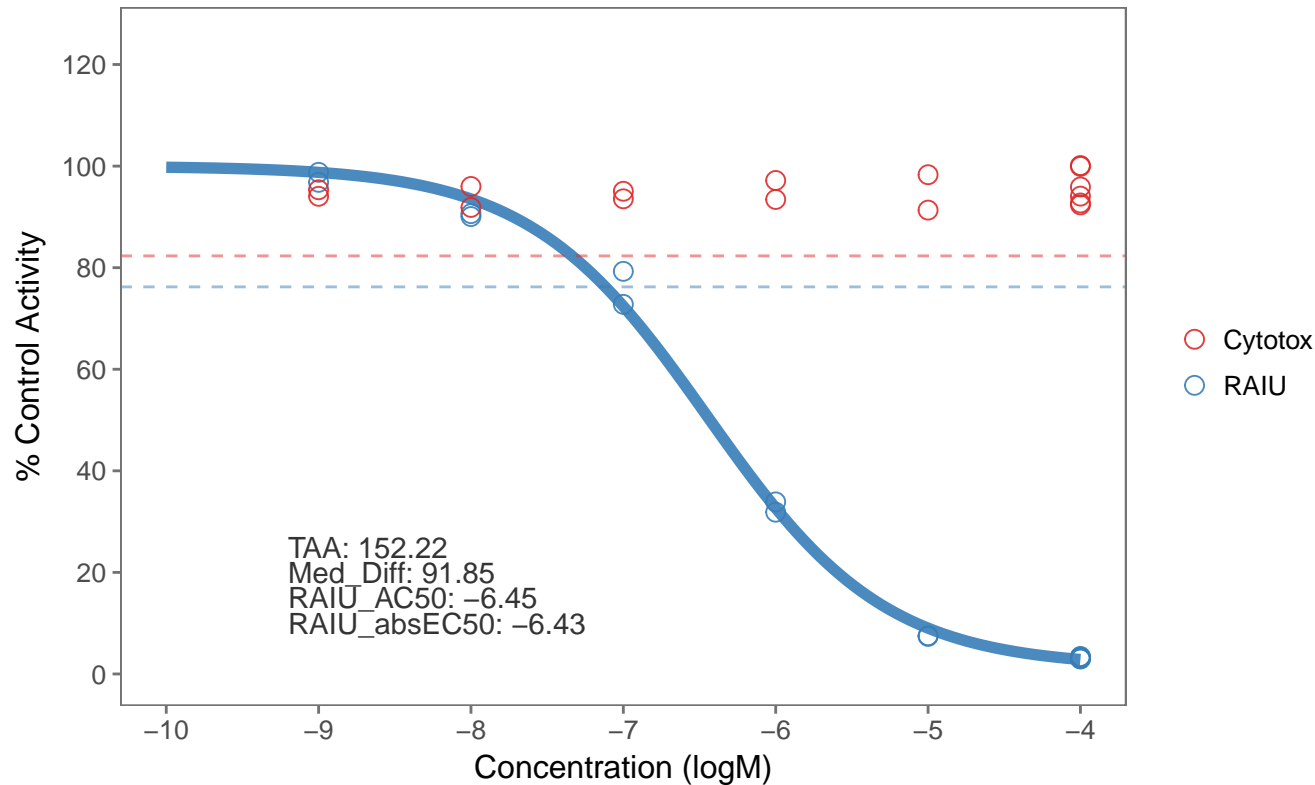



18 . SPID: NaClO4\_Plate\_14\_rep3

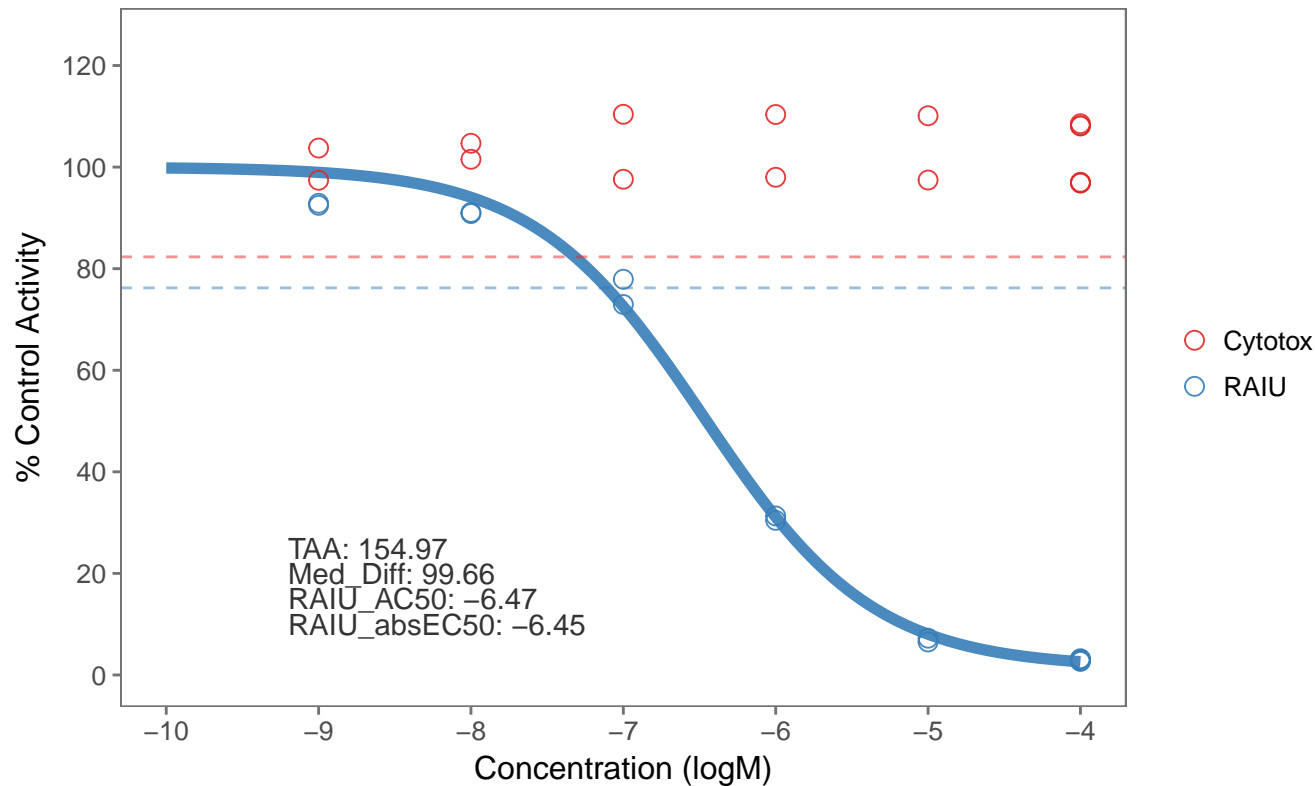

19 . SPID: NaClO4\_Plate\_15\_rep1

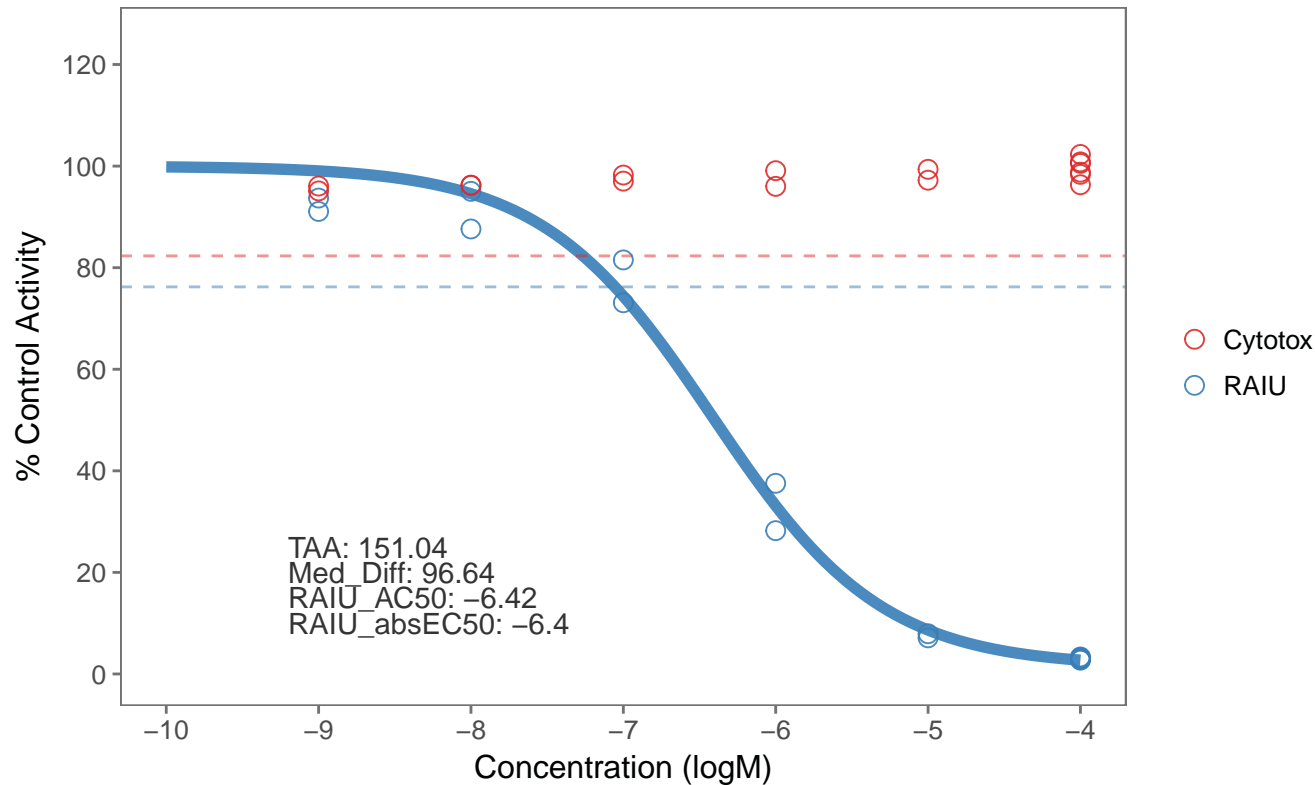

20 . SPID: NaClO4\_Plate\_15\_rep2

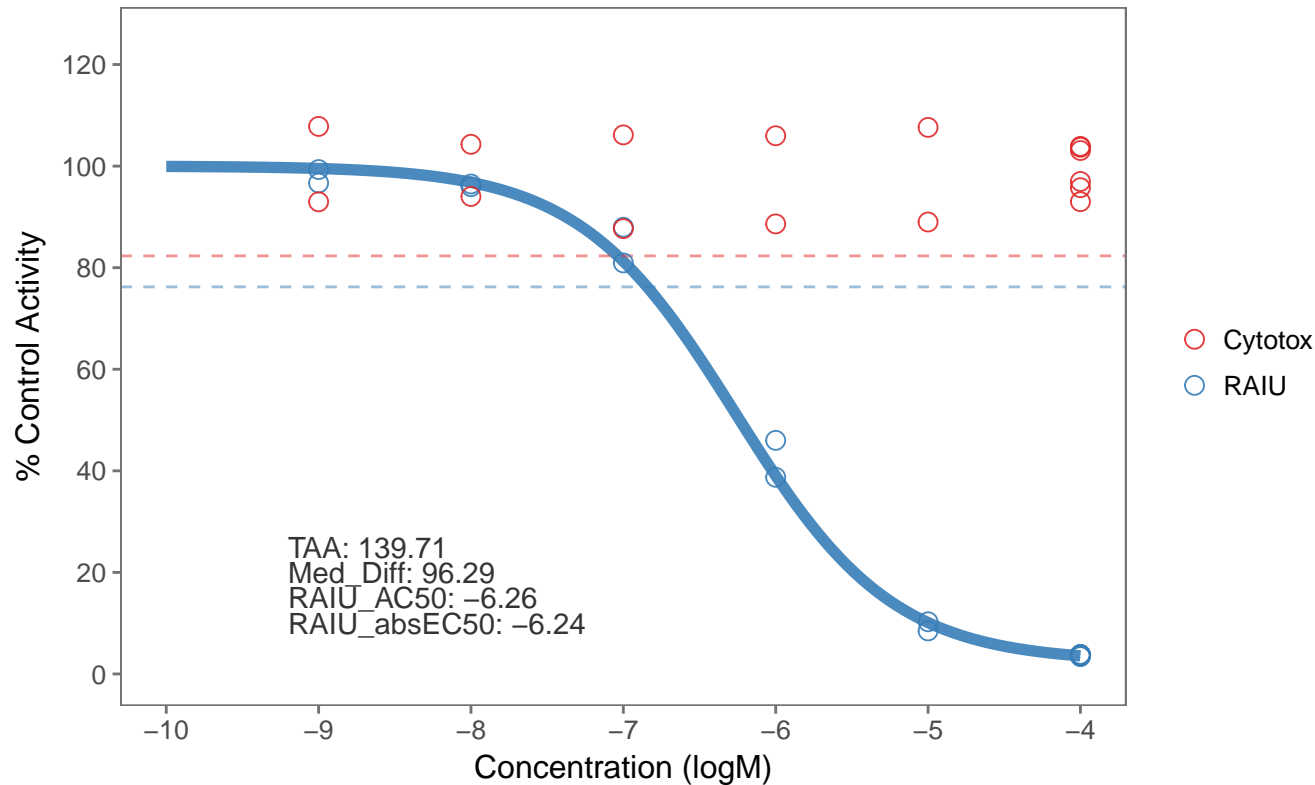

21 . SPID: NaClO4\_Plate\_15\_rep3

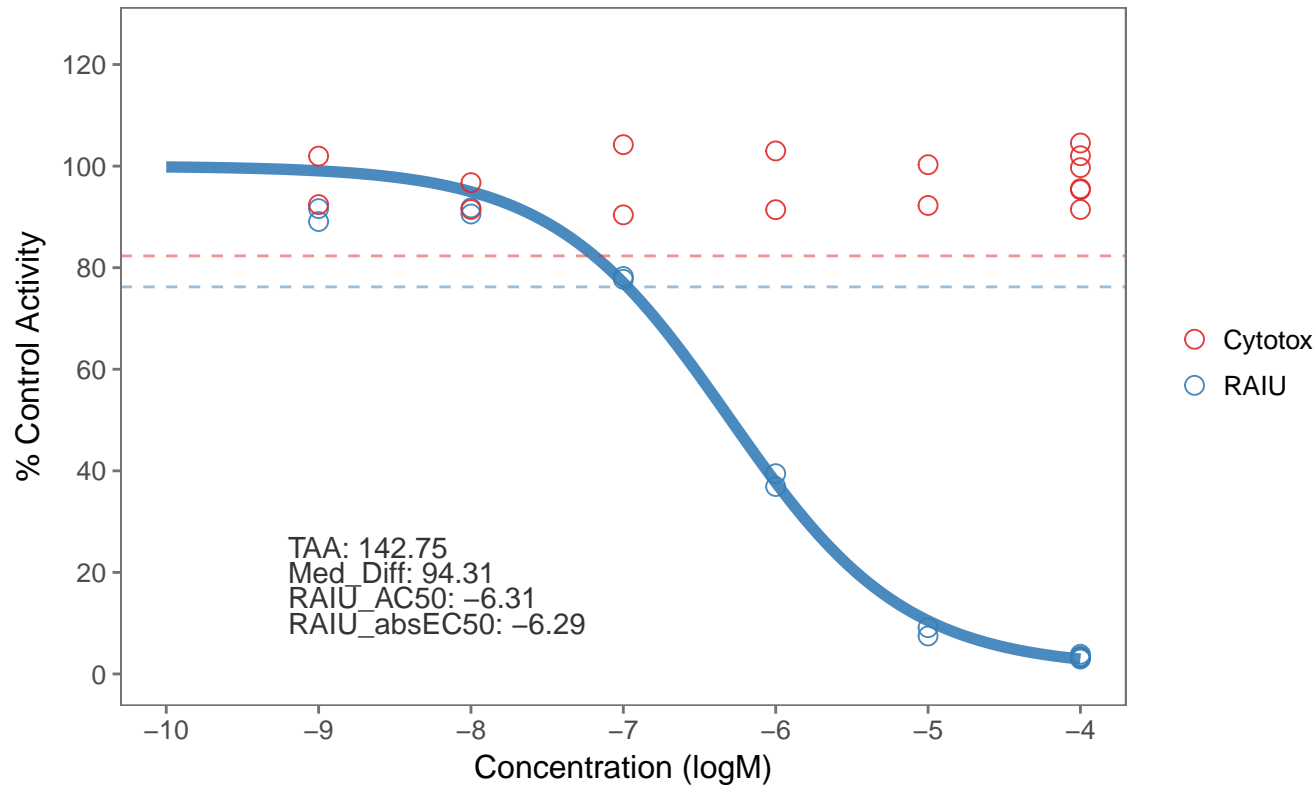

### 22 . SPID: NaClO4\_Plate\_16\_rep1

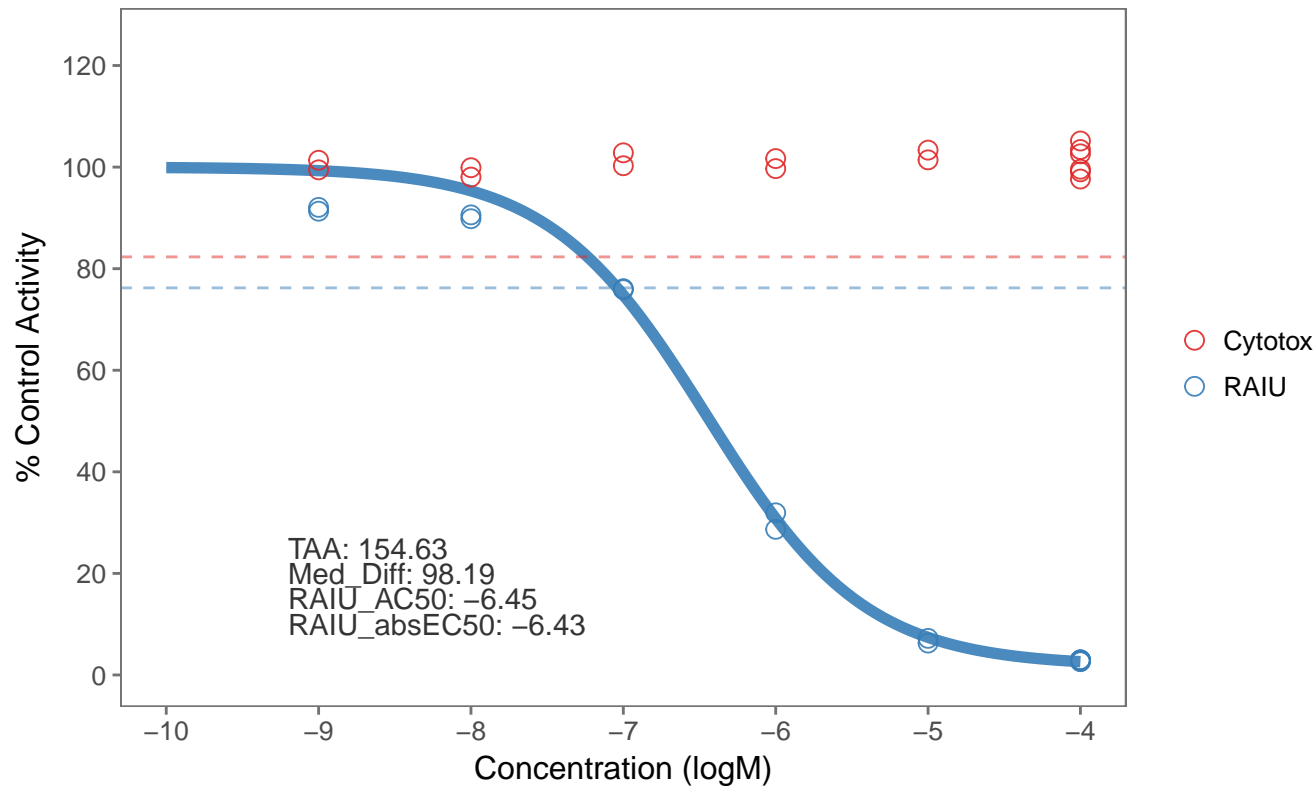

23 . SPID: NaClO4\_Plate\_16\_rep2

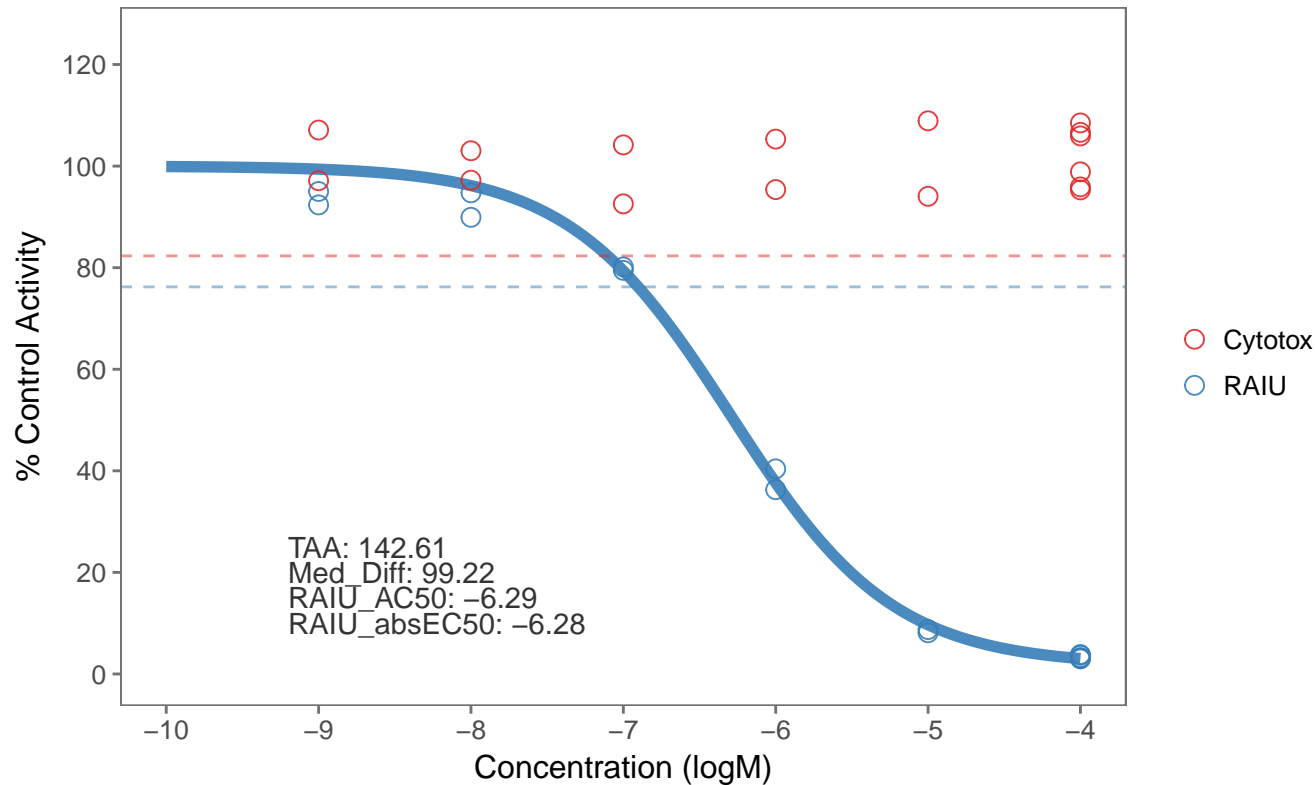

24 . SPID: NaClO4\_Plate\_16\_rep3

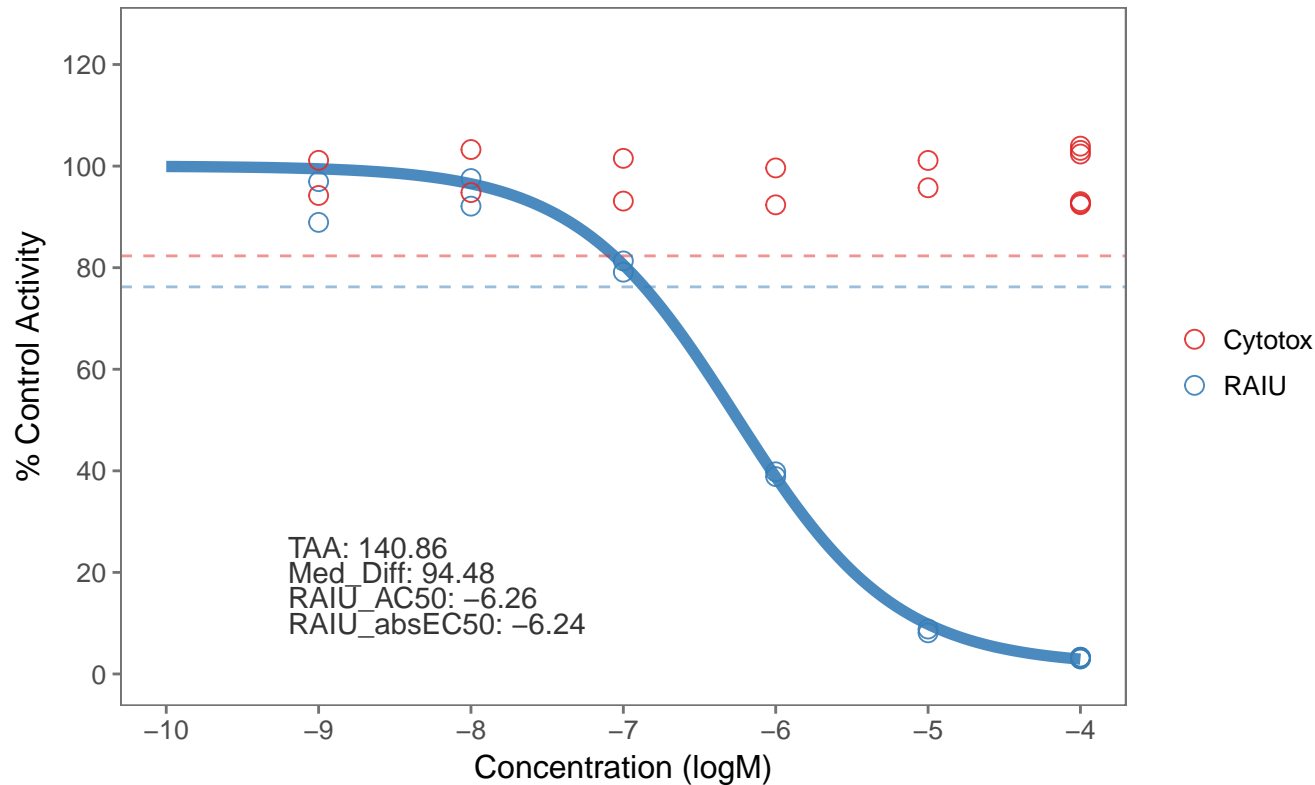

25 . SPID: NaClO4\_Plate\_17\_rep1

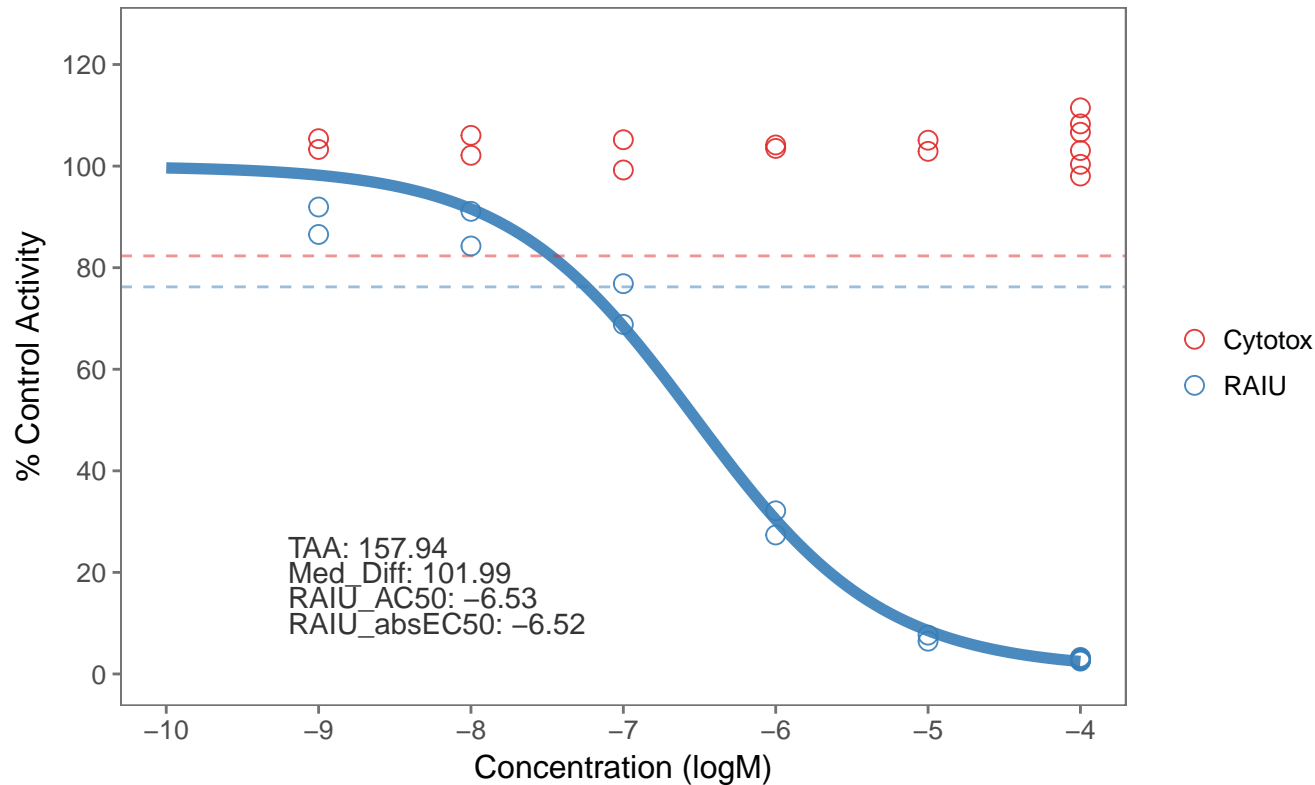



26 . SPID: NaClO4\_Plate\_17\_rep2

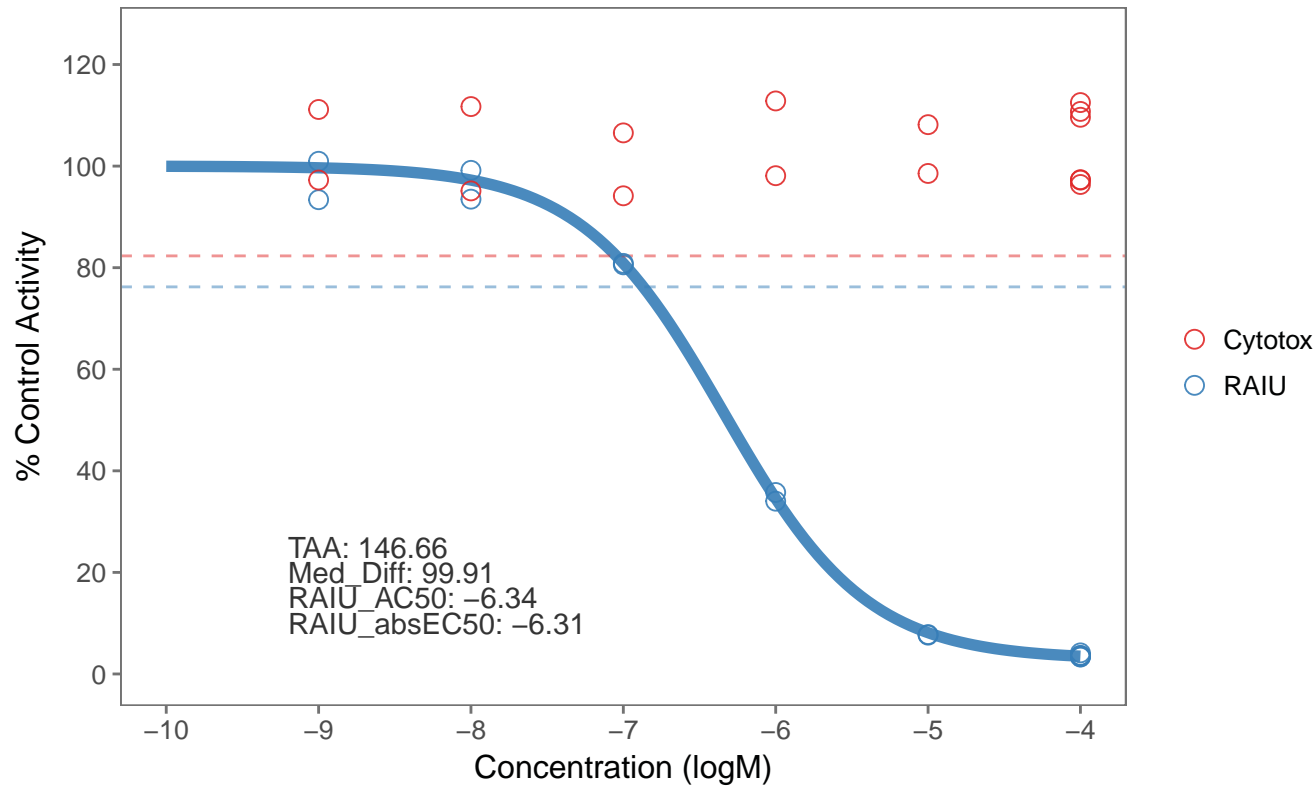

27 . SPID: NaClO4\_Plate\_17\_rep3

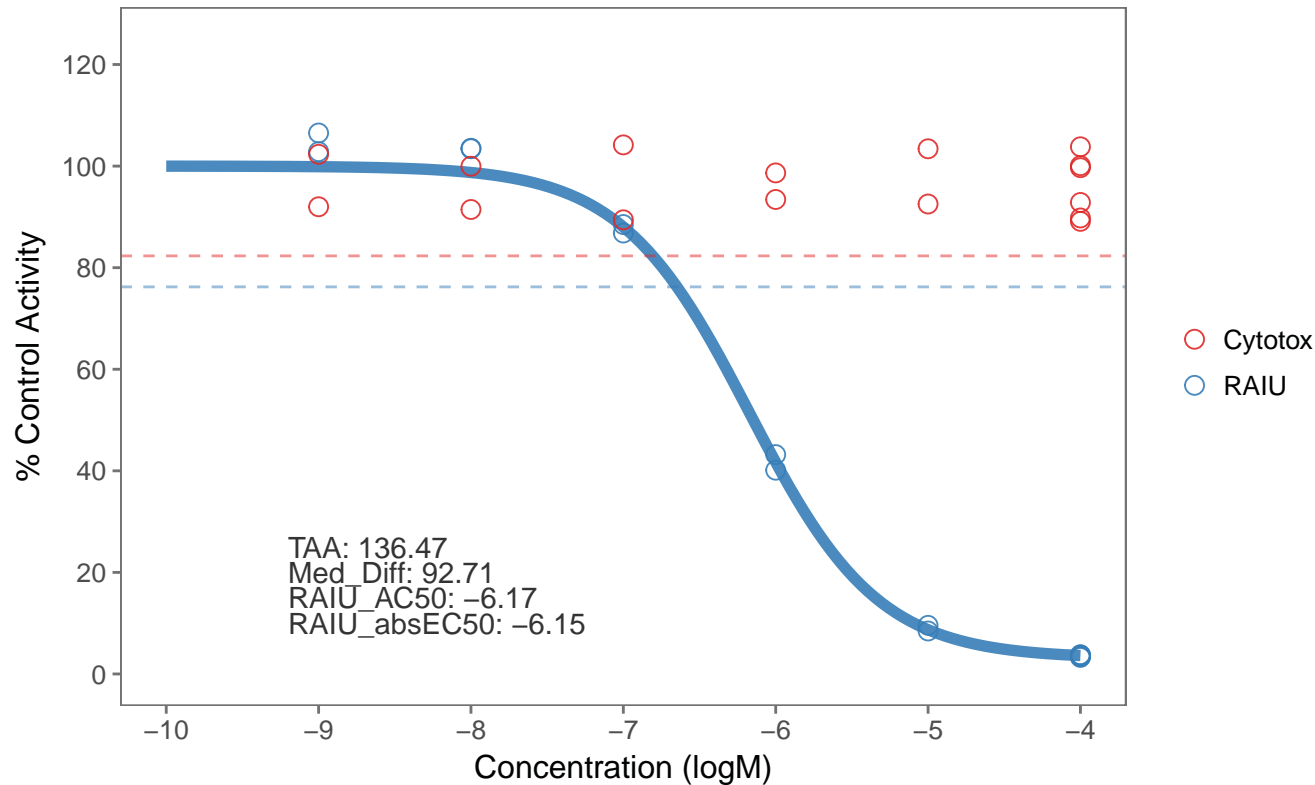

28 . SPID: NaClO4\_Plate\_18\_rep1

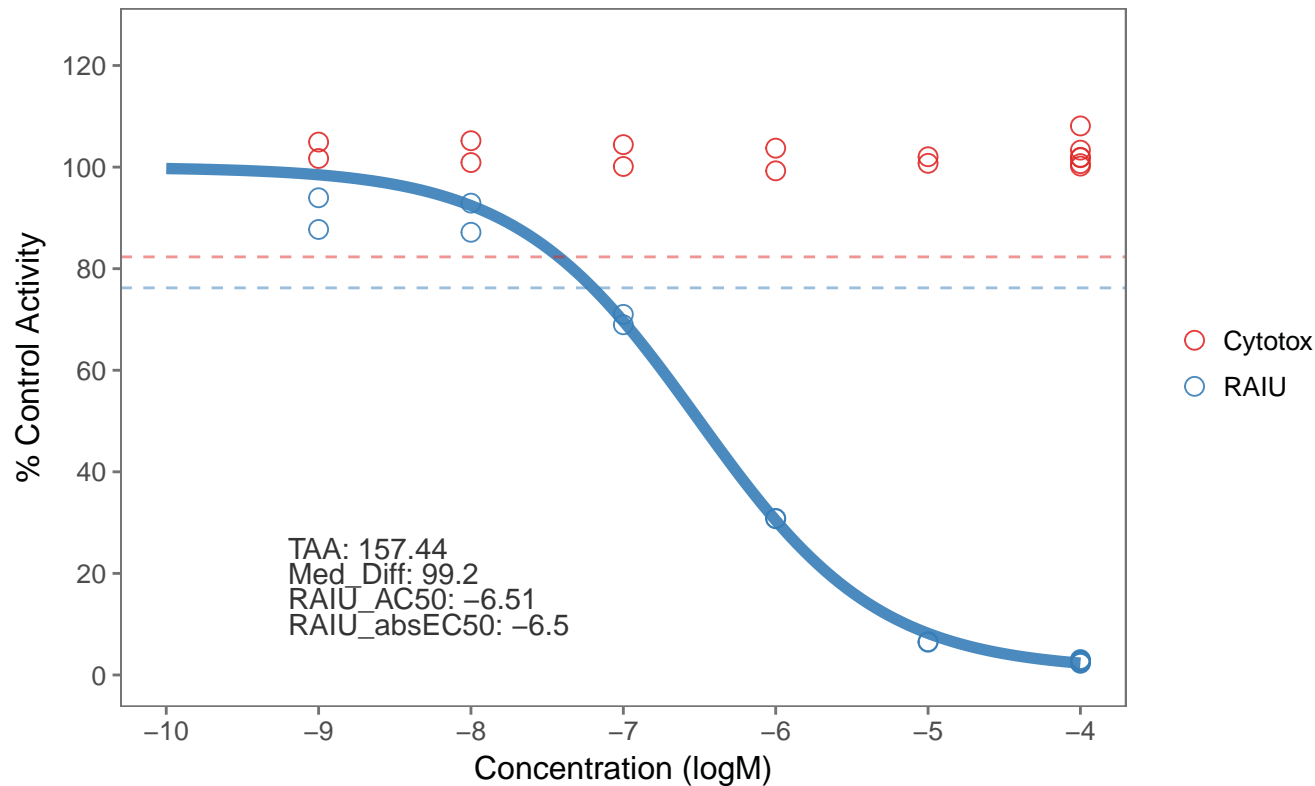

29 . SPID: NaClO4\_Plate\_18\_rep2

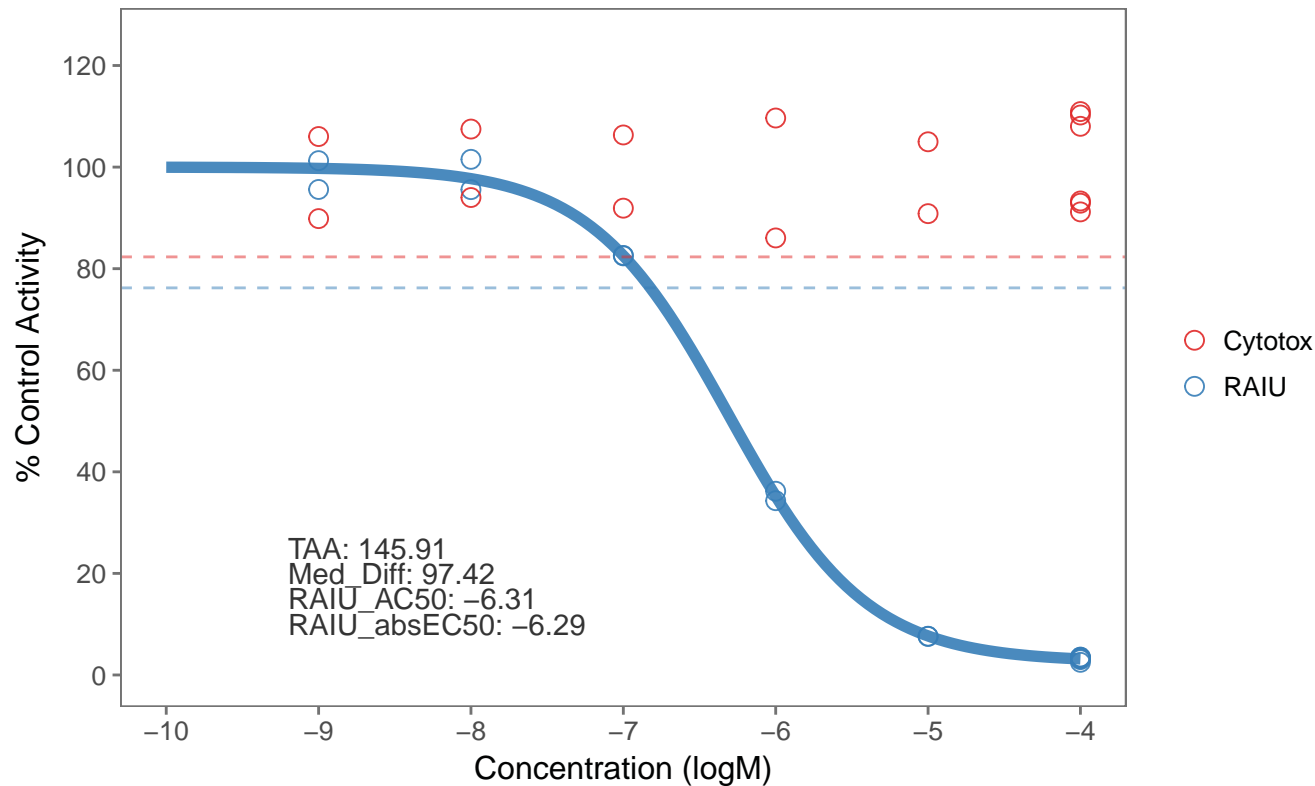

30 . SPID: NaClO4\_Plate\_18\_rep3

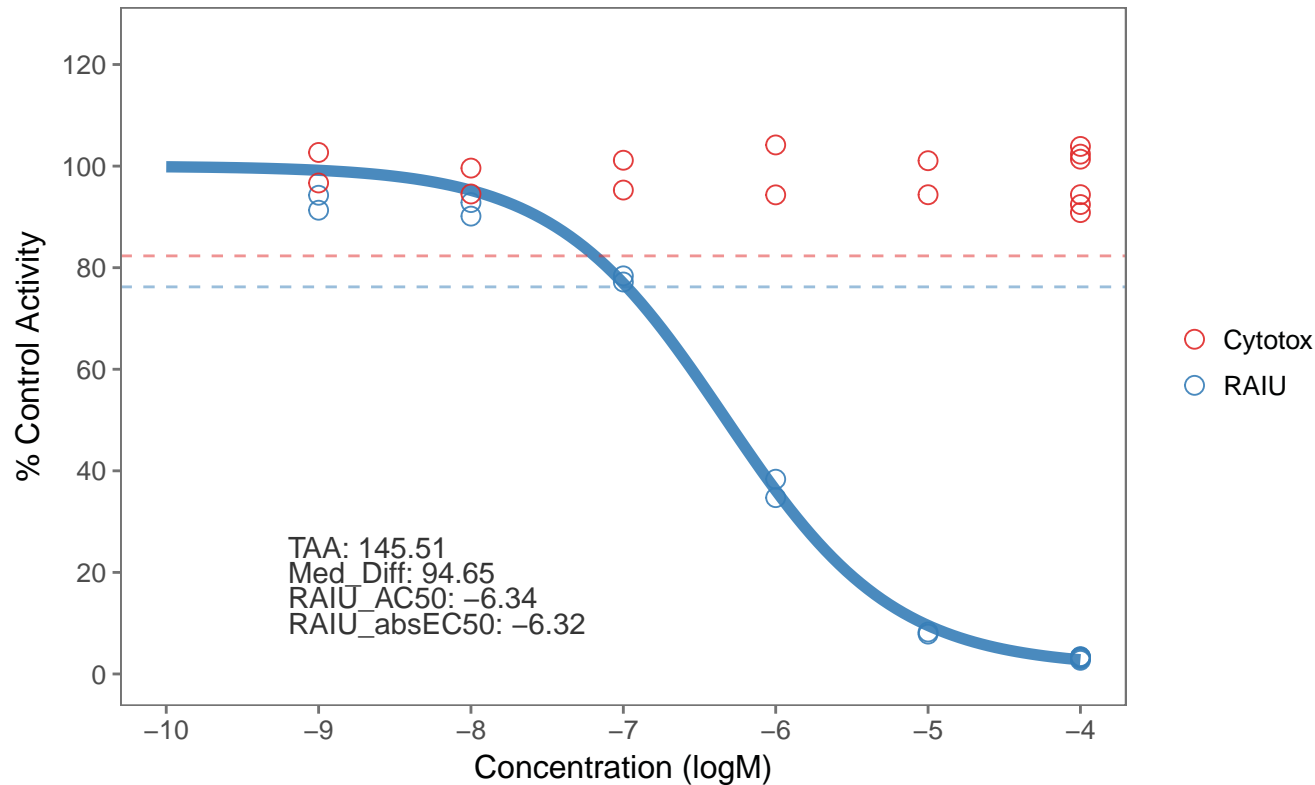

### 31 . SPID: NaClO4\_Plate\_2\_rep1

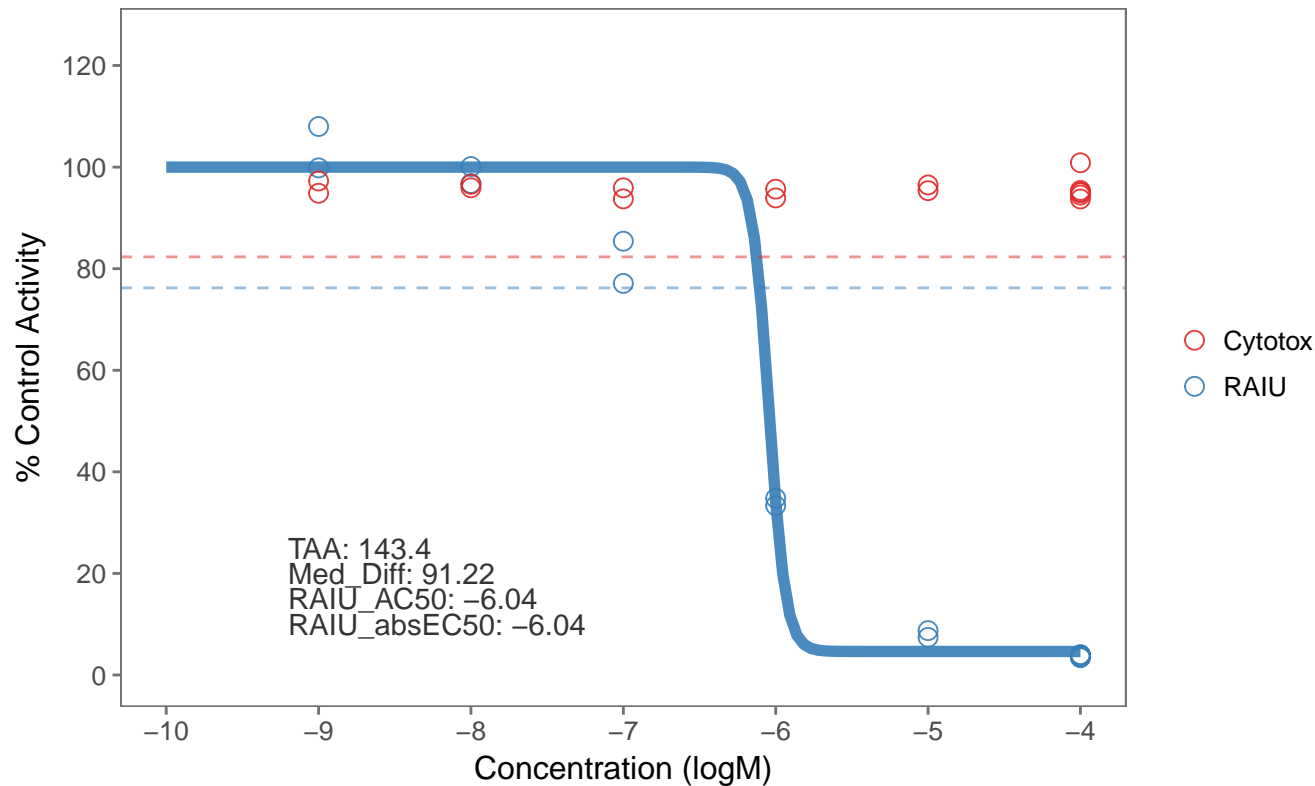

### 32 . SPID: NaClO4\_Plate\_2\_rep2

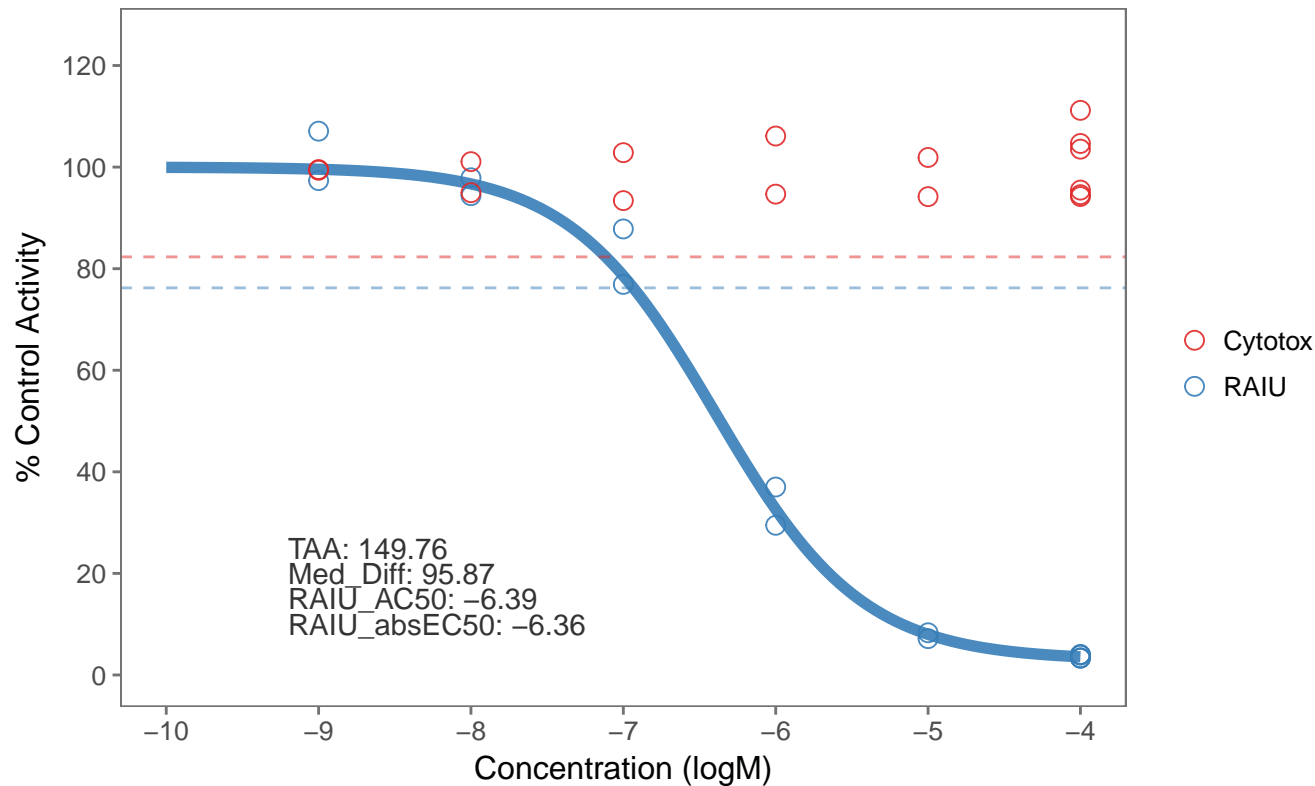

### 33 . SPID: NaClO4\_Plate\_2\_rep3

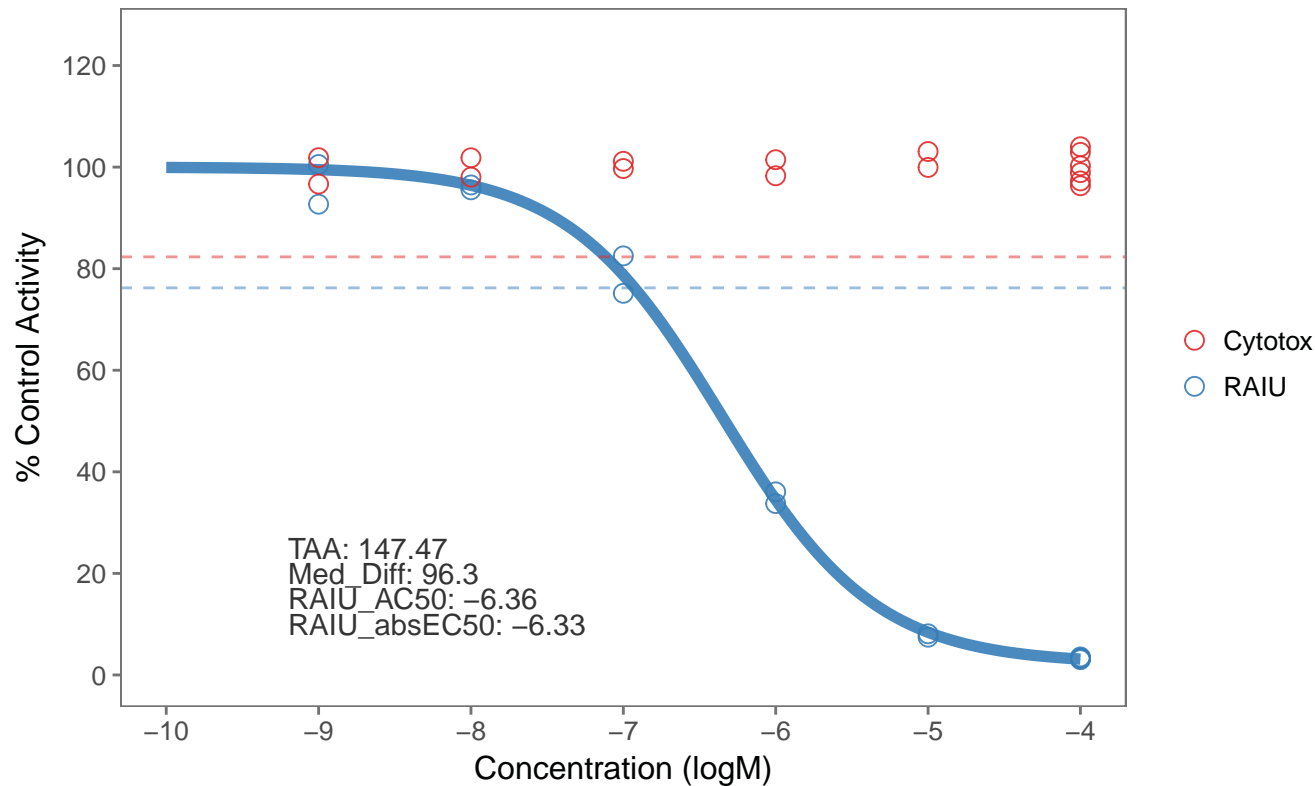



### 34 . SPID: NaClO4\_Plate\_3\_rep1

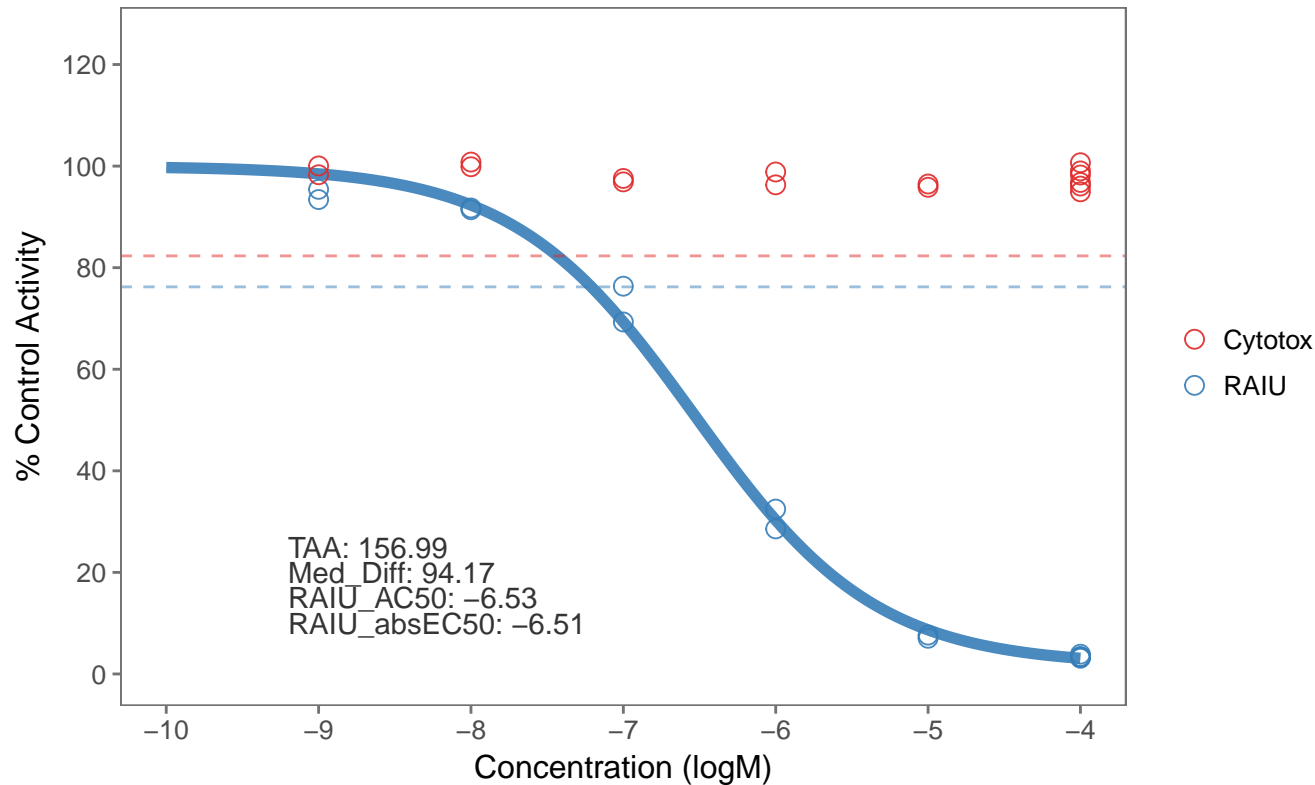

### 35 . SPID: NaClO4\_Plate\_3\_rep2

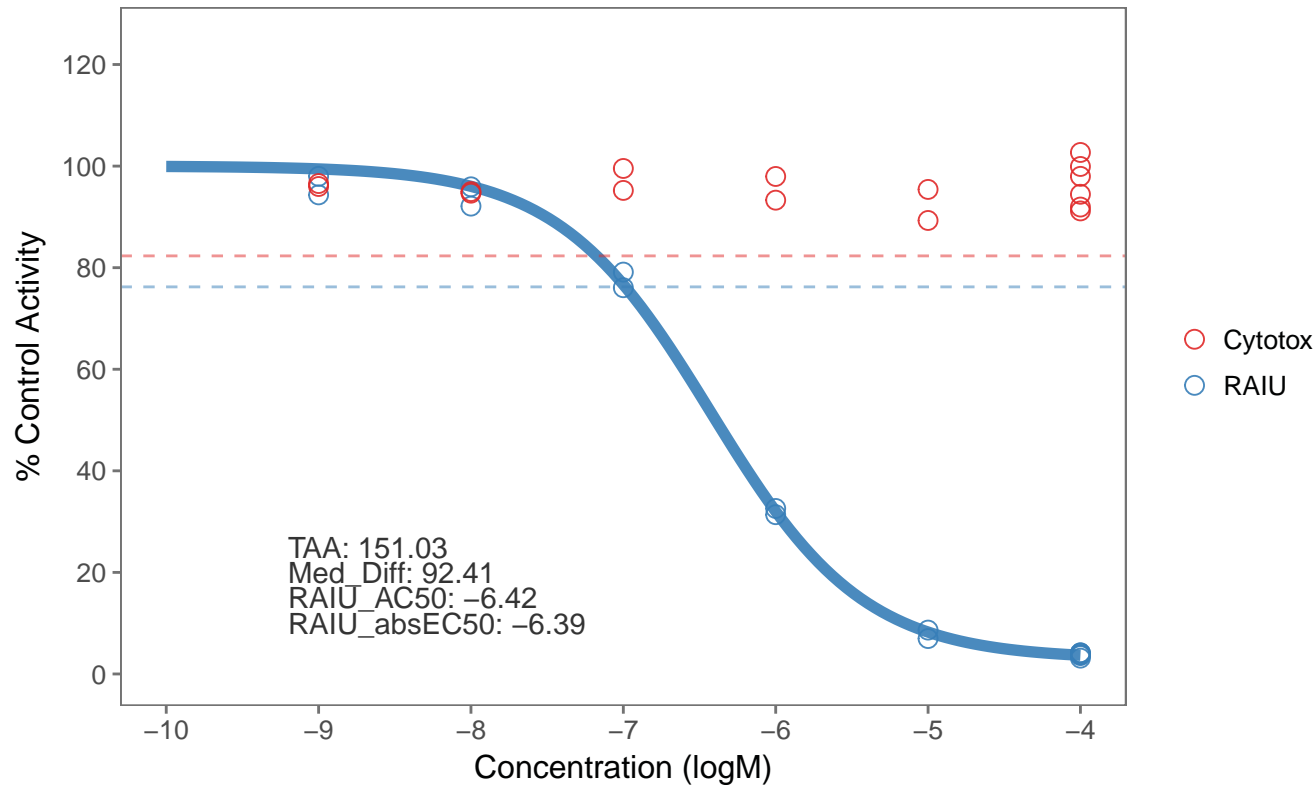

36 . SPID: NaClO4\_Plate\_3\_rep3

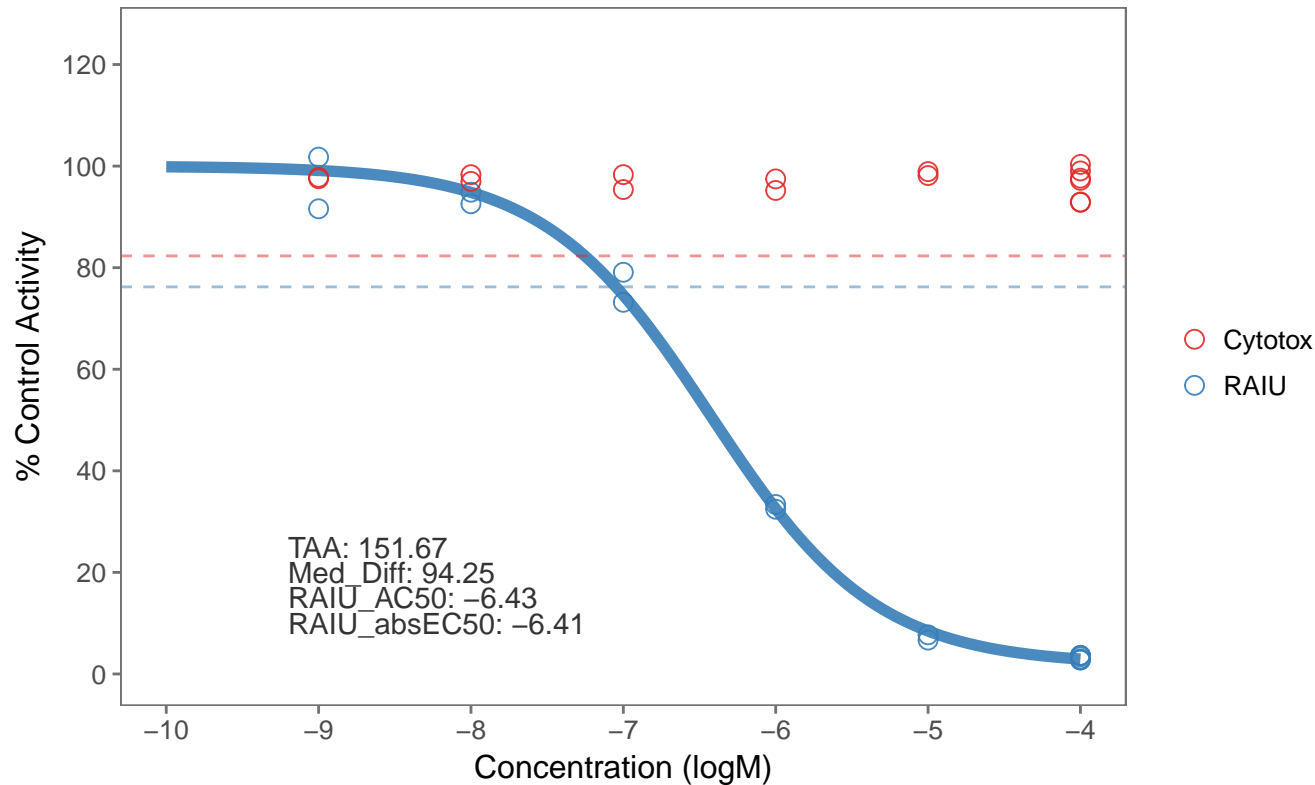

### 37 . SPID: NaClO4\_Plate\_4\_rep1

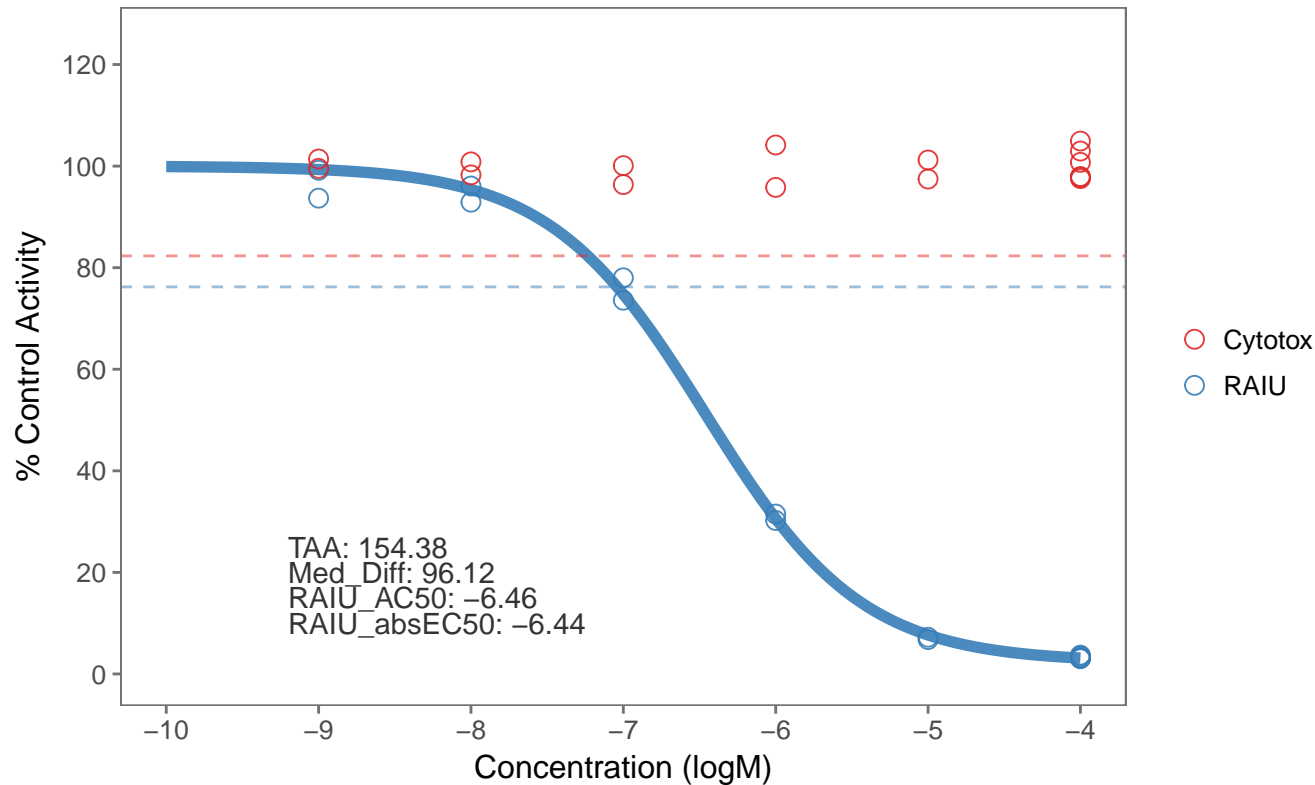

### 38 . SPID: NaClO4\_Plate\_4\_rep2

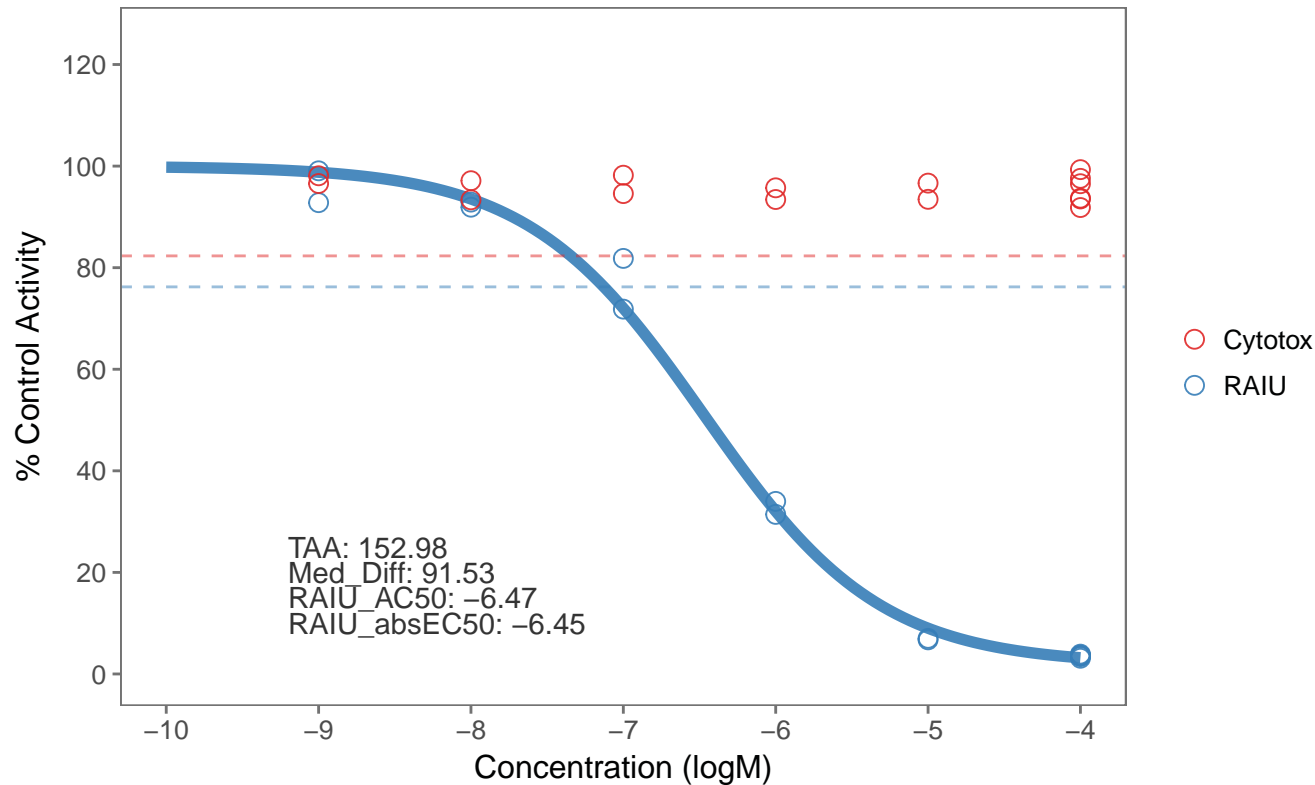

### 39 . SPID: NaClO4\_Plate\_4\_rep3

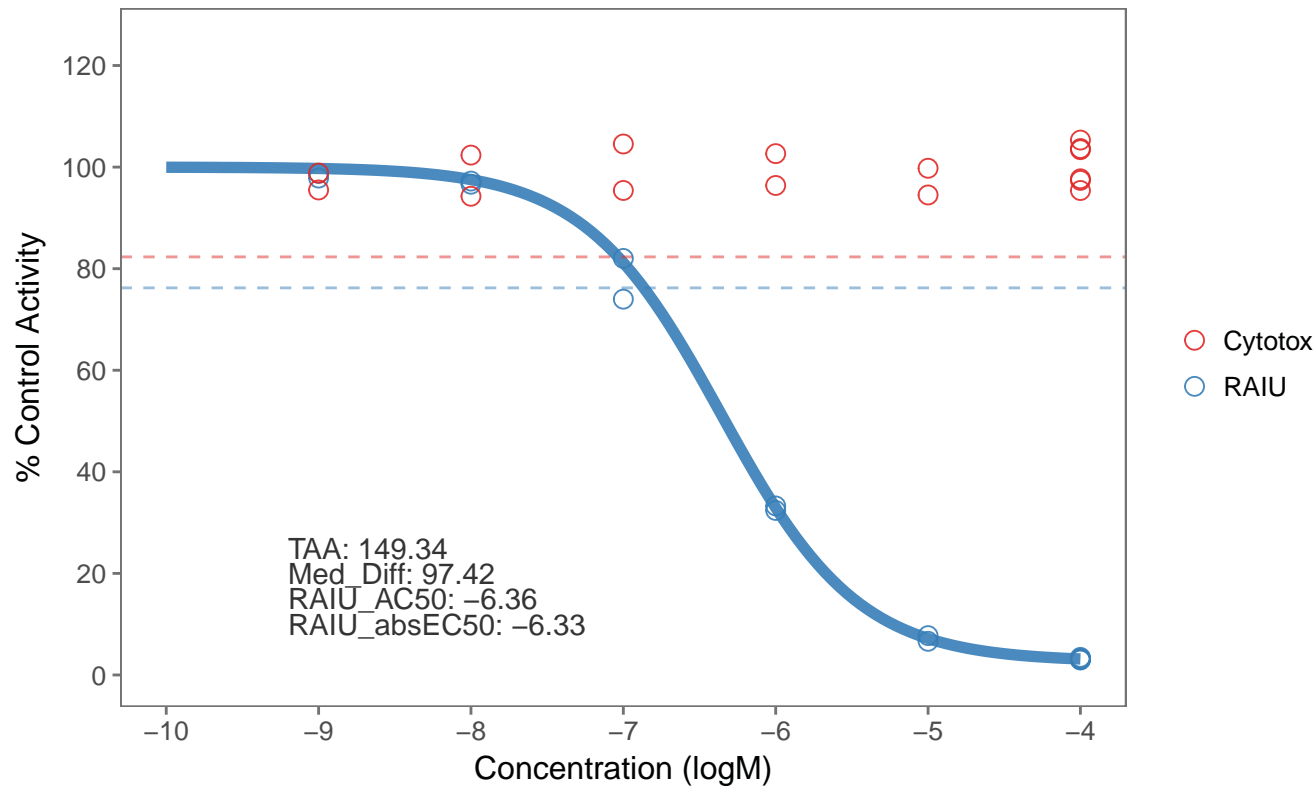

40 . SPID: NaClO4\_Plate\_5\_rep1

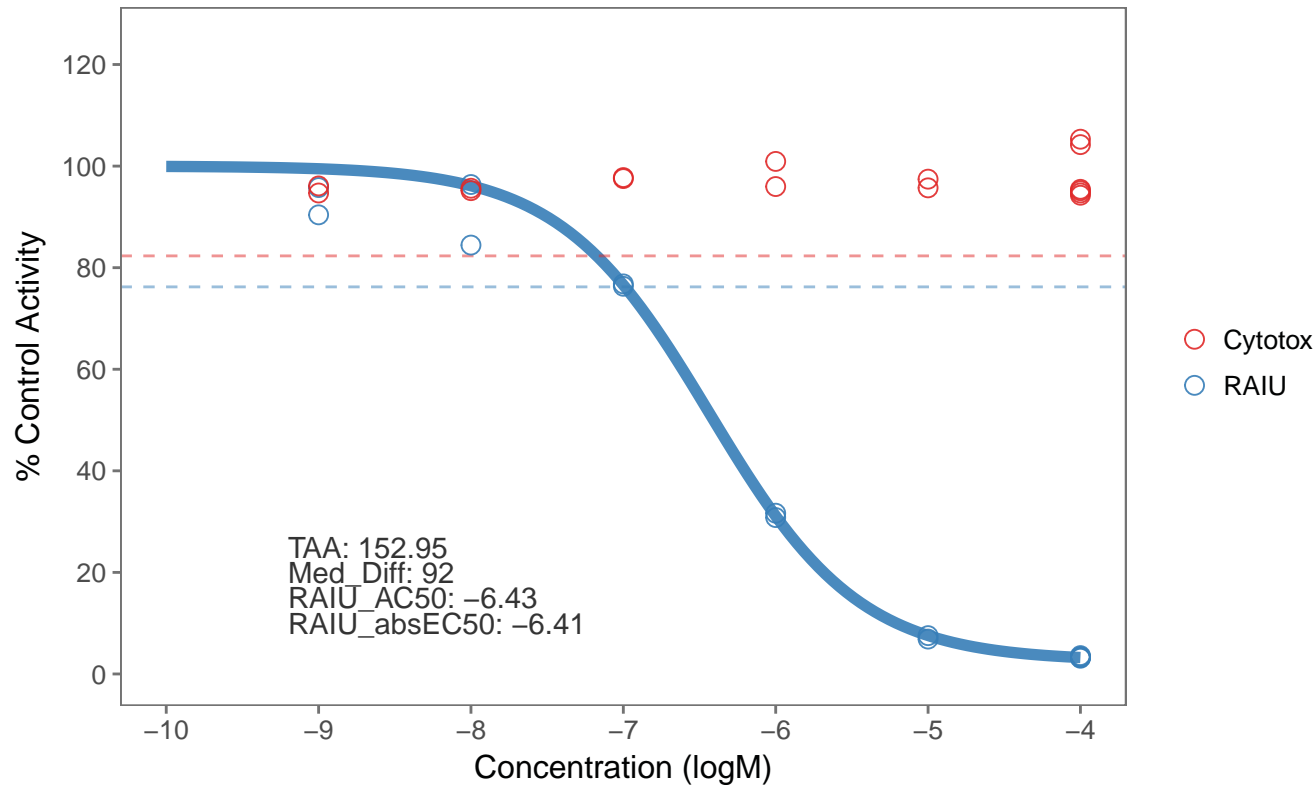

### 41 . SPID: NaClO4\_Plate\_5\_rep2

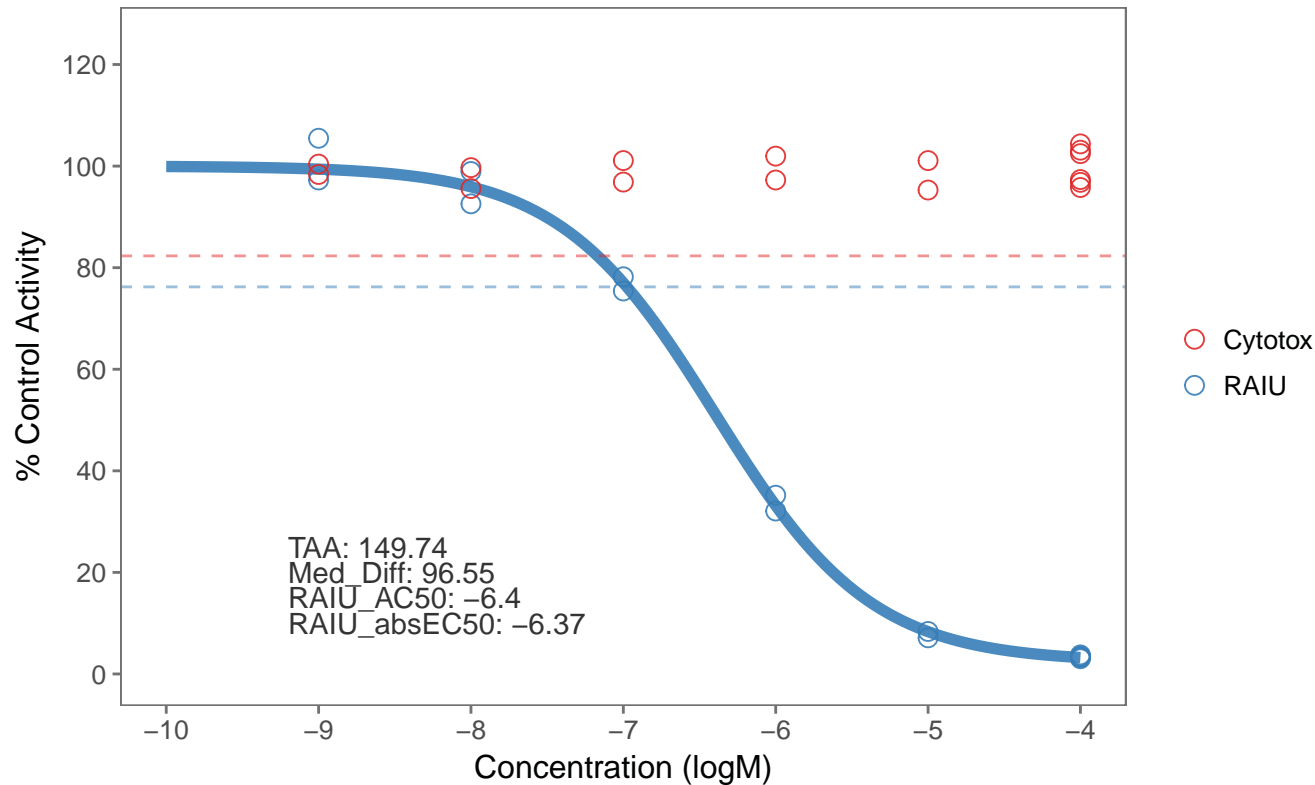



### 42 . SPID: NaClO4\_Plate\_5\_rep3

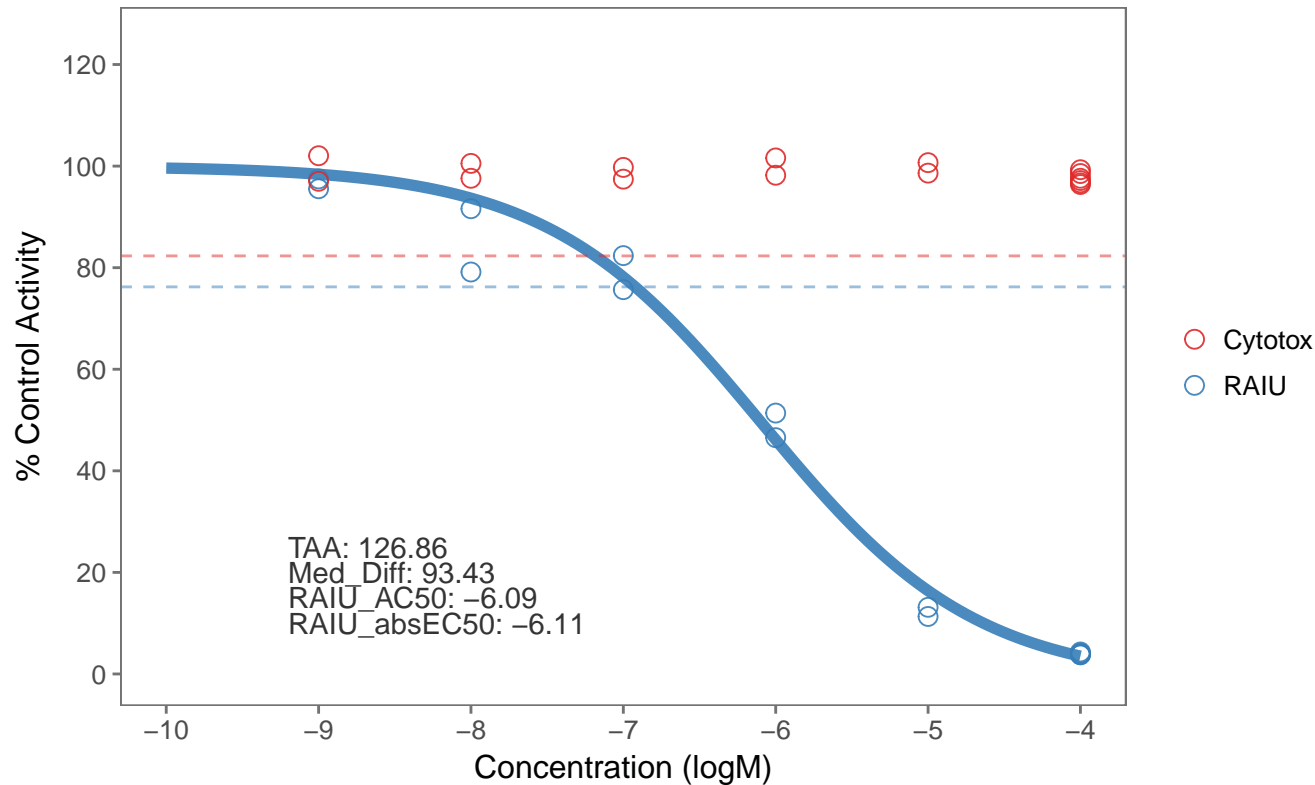

43 . SPID: NaClO4\_Plate\_6\_rep1

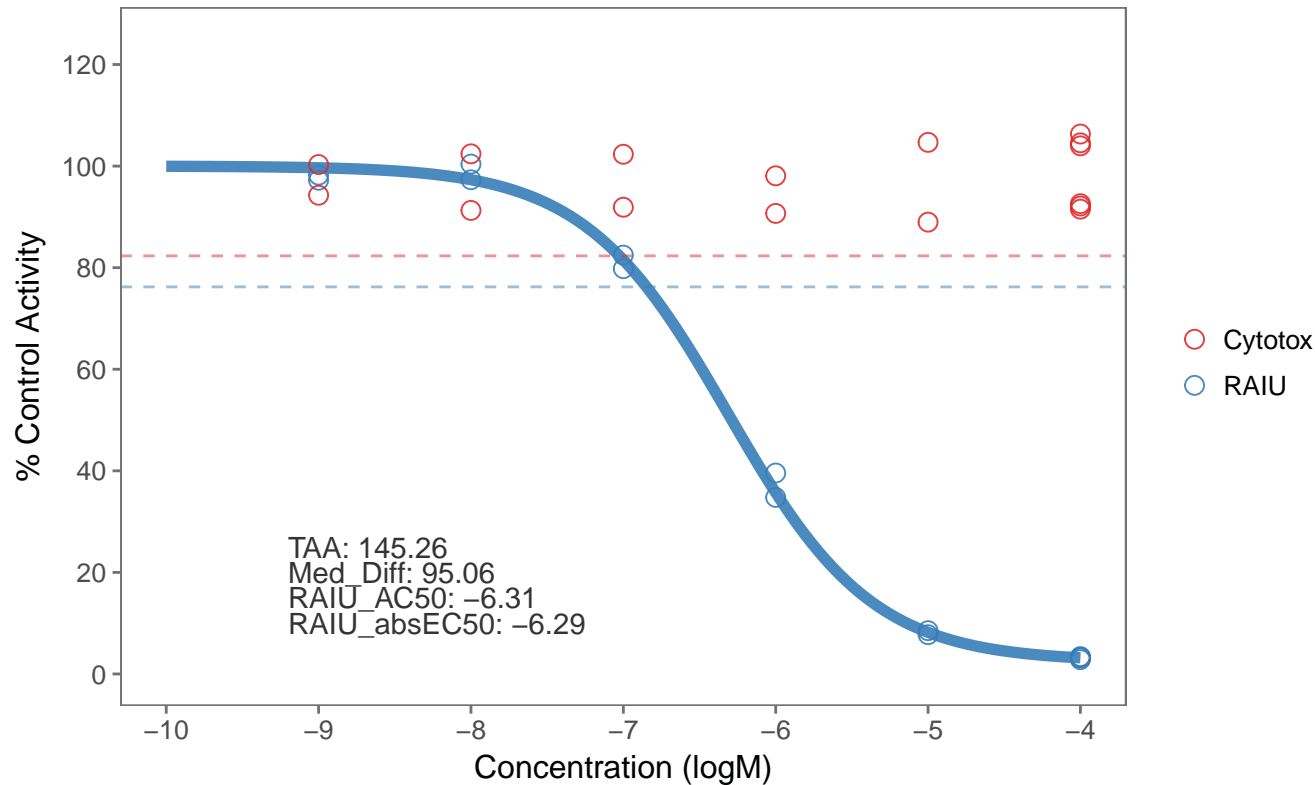

### 44 . SPID: NaClO4\_Plate\_6\_rep2

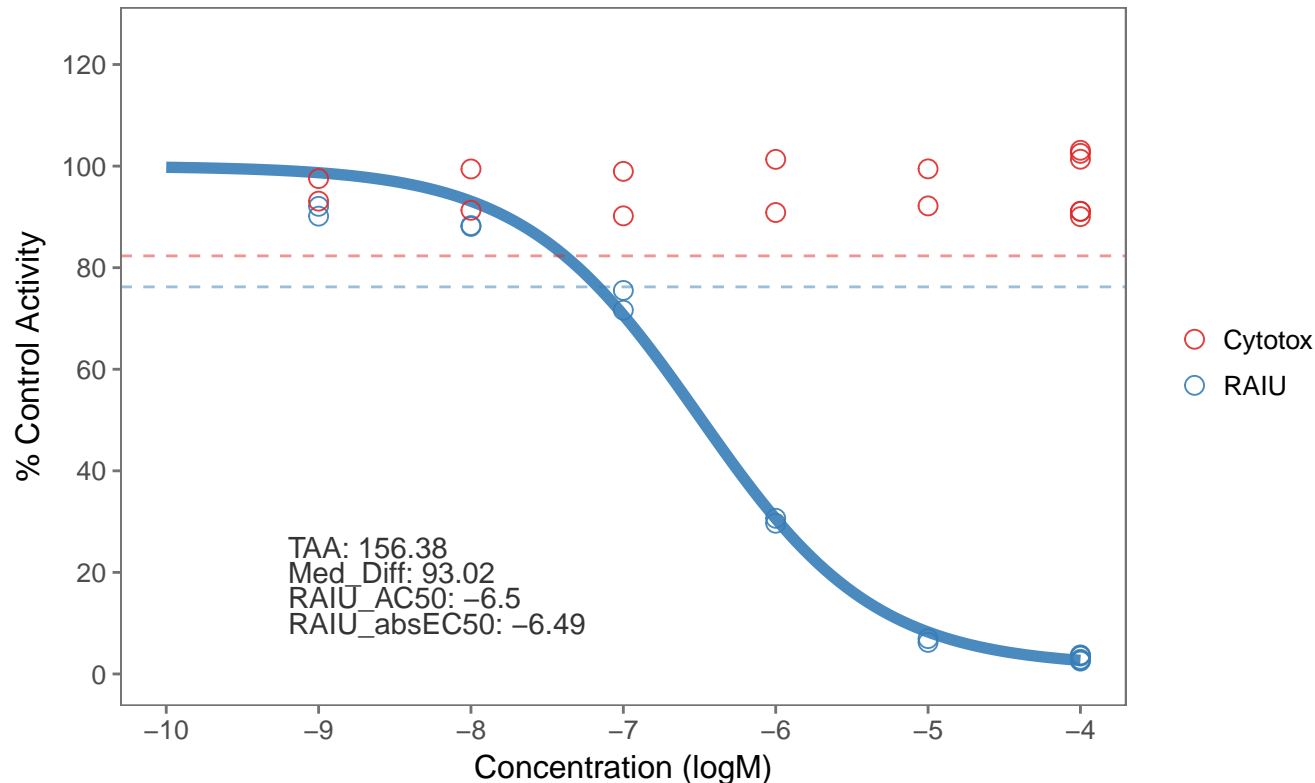

### 45 . SPID: NaClO4\_Plate\_6\_rep3

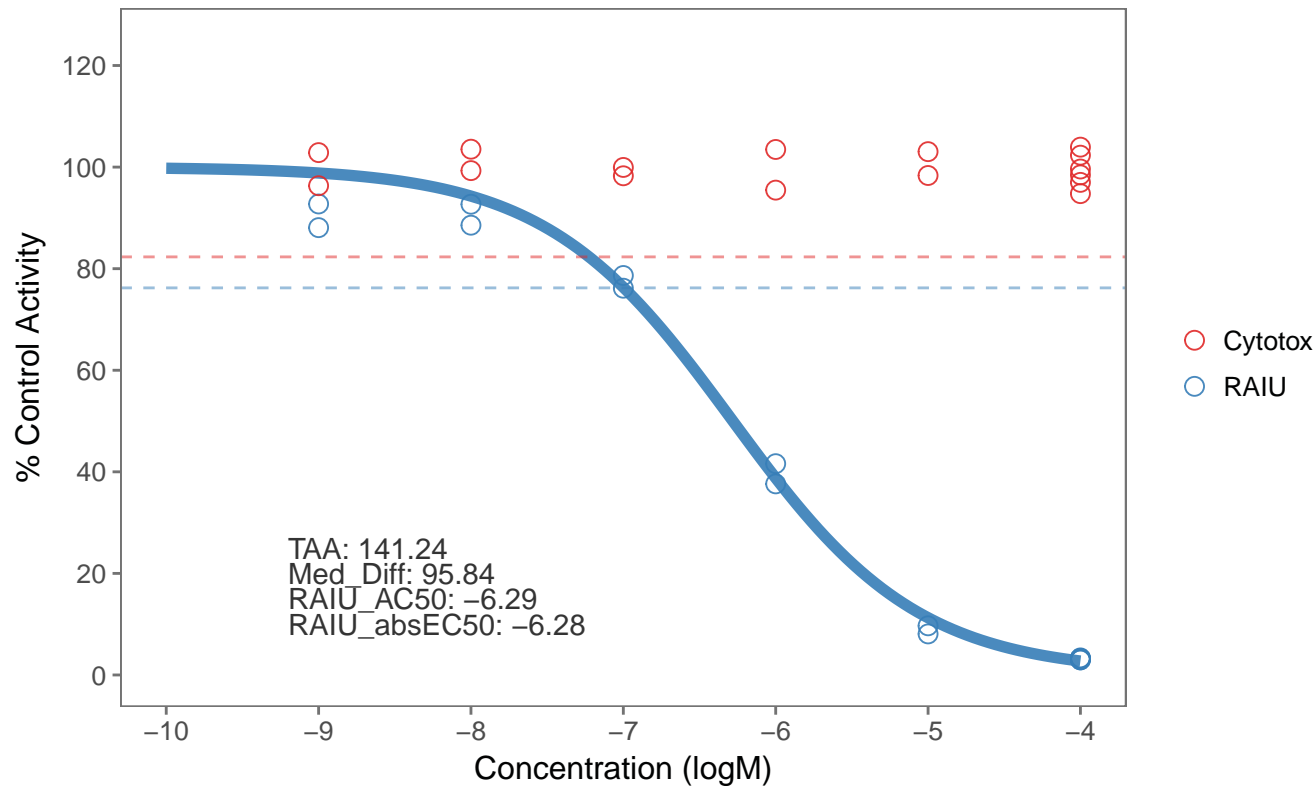

46 . SPID: NaClO4\_Plate\_7\_rep1

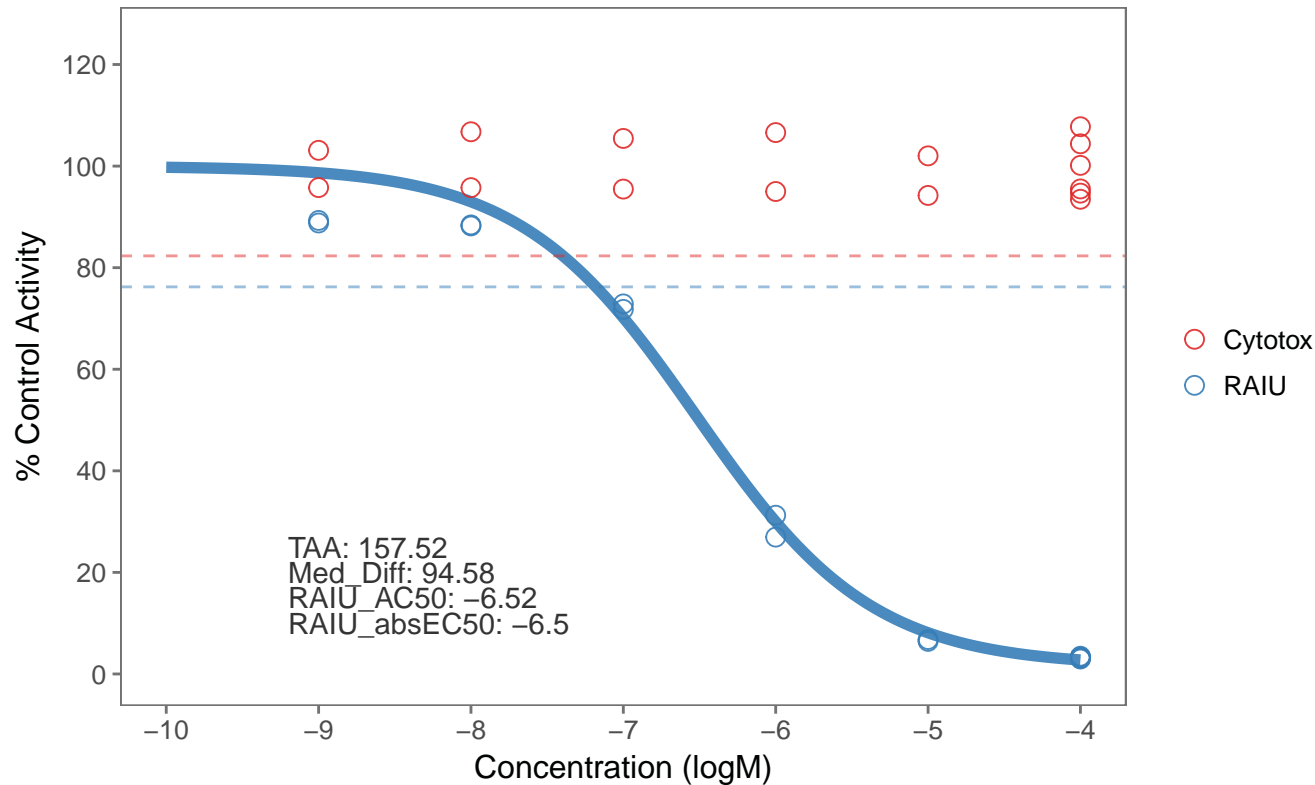

47 . SPID: NaClO4\_Plate\_7\_rep2

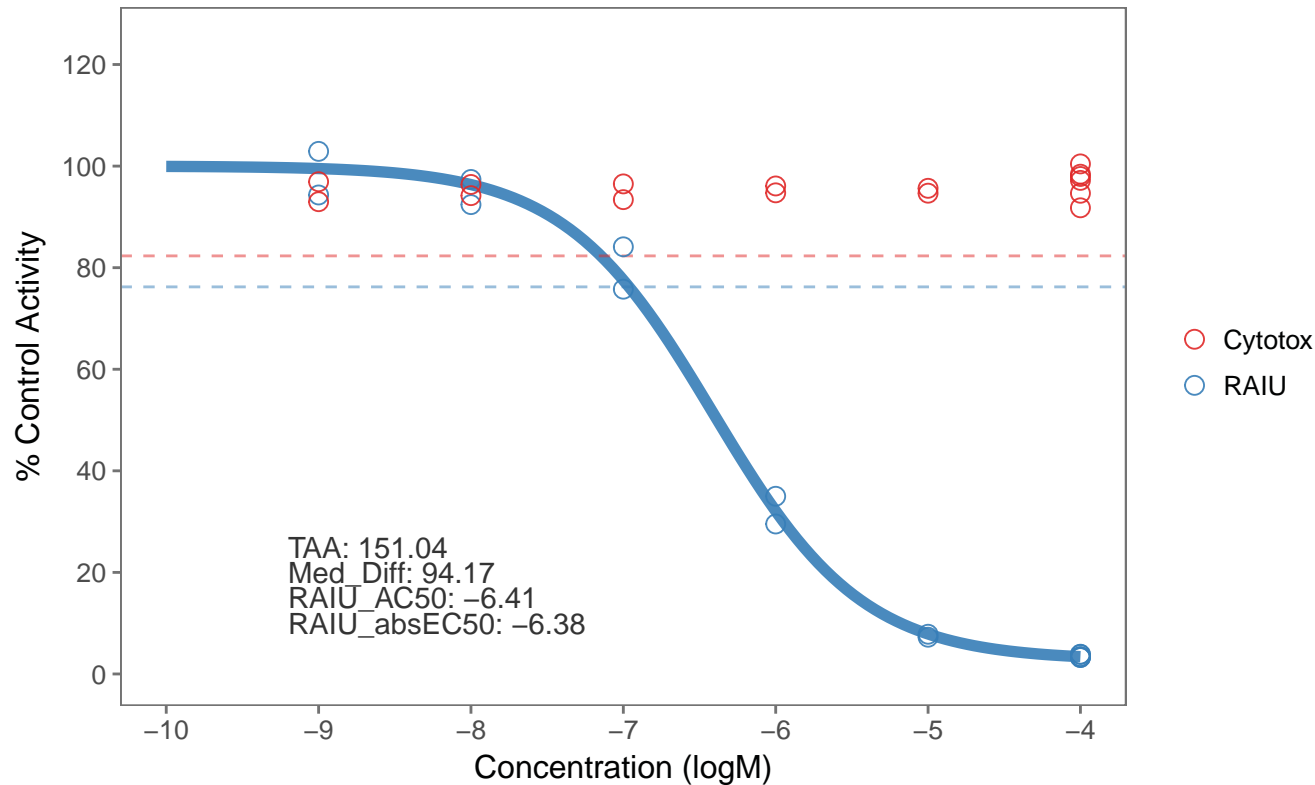

48 . SPID: NaClO4\_Plate\_7\_rep3

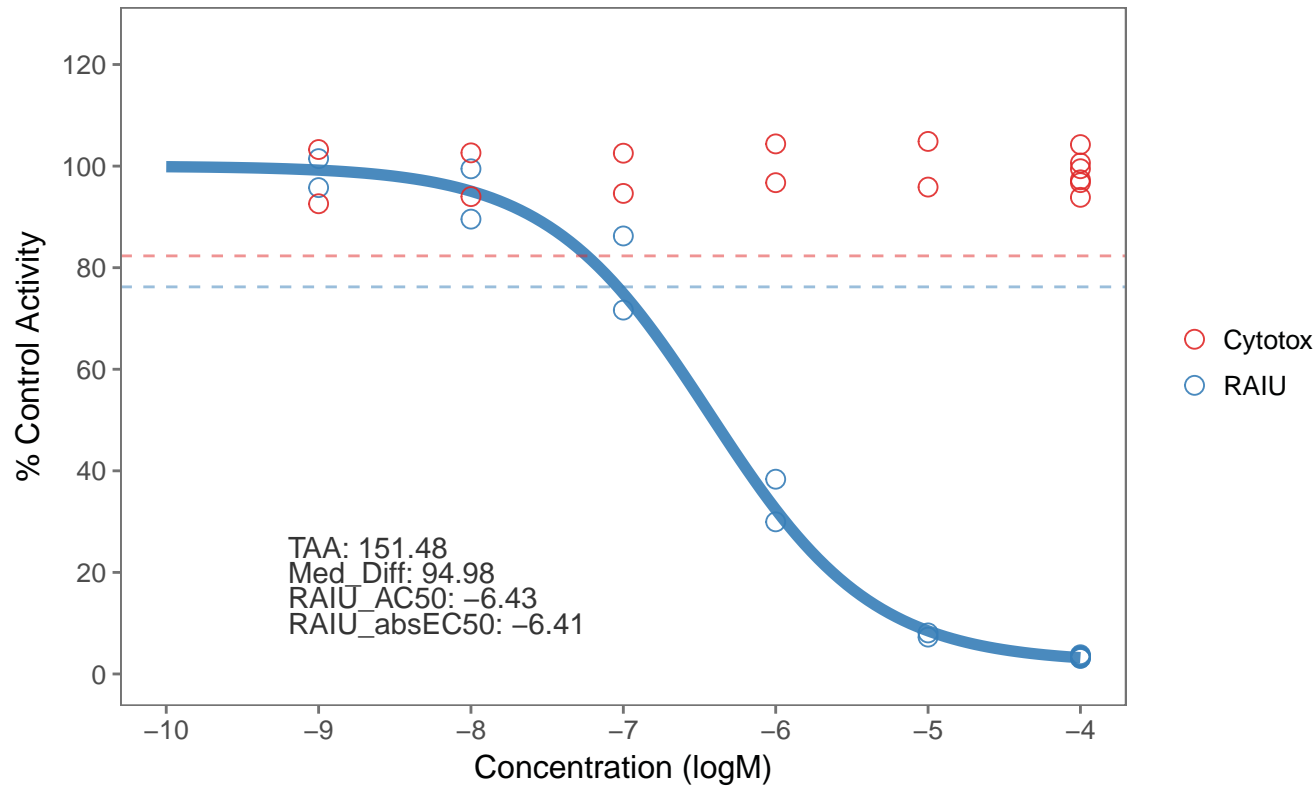

49 . SPID: NaClO4\_Plate\_8\_rep1

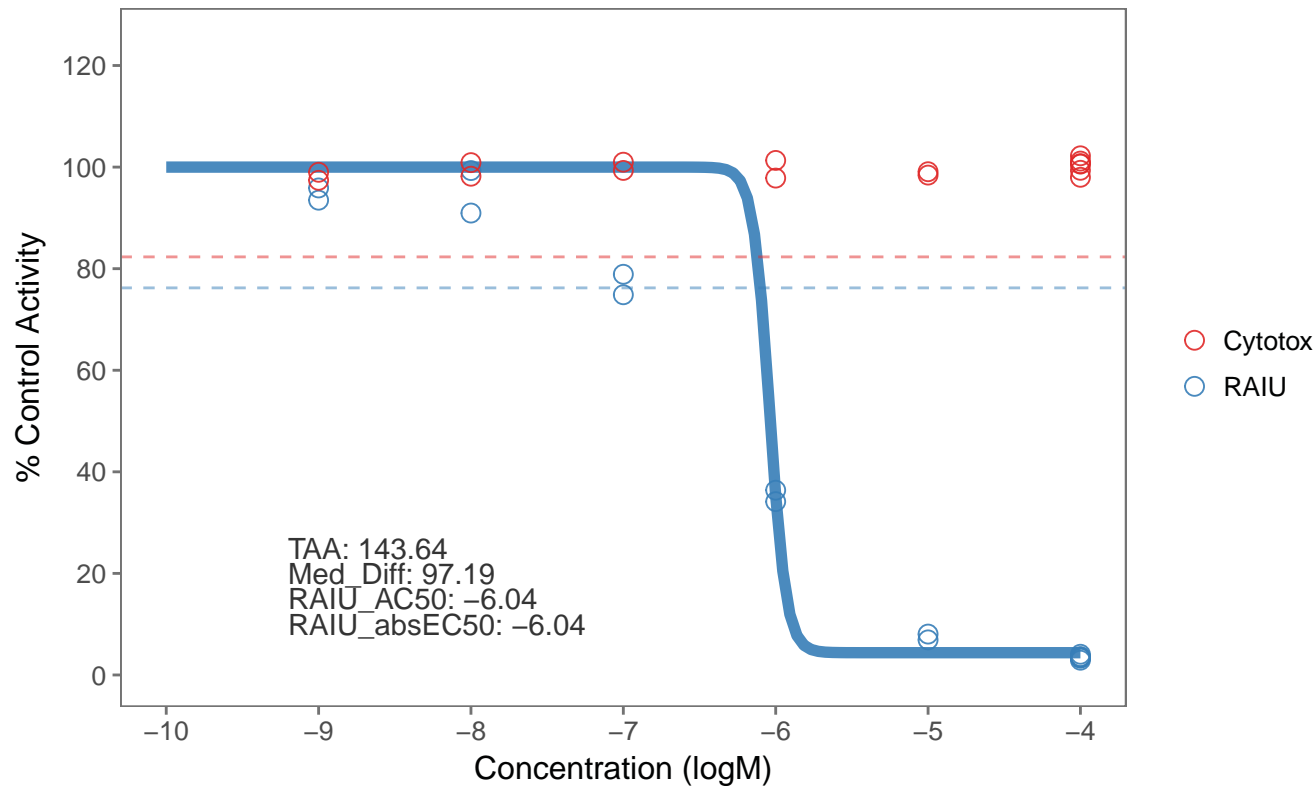



50 . SPID: NaClO4\_Plate\_8\_rep2

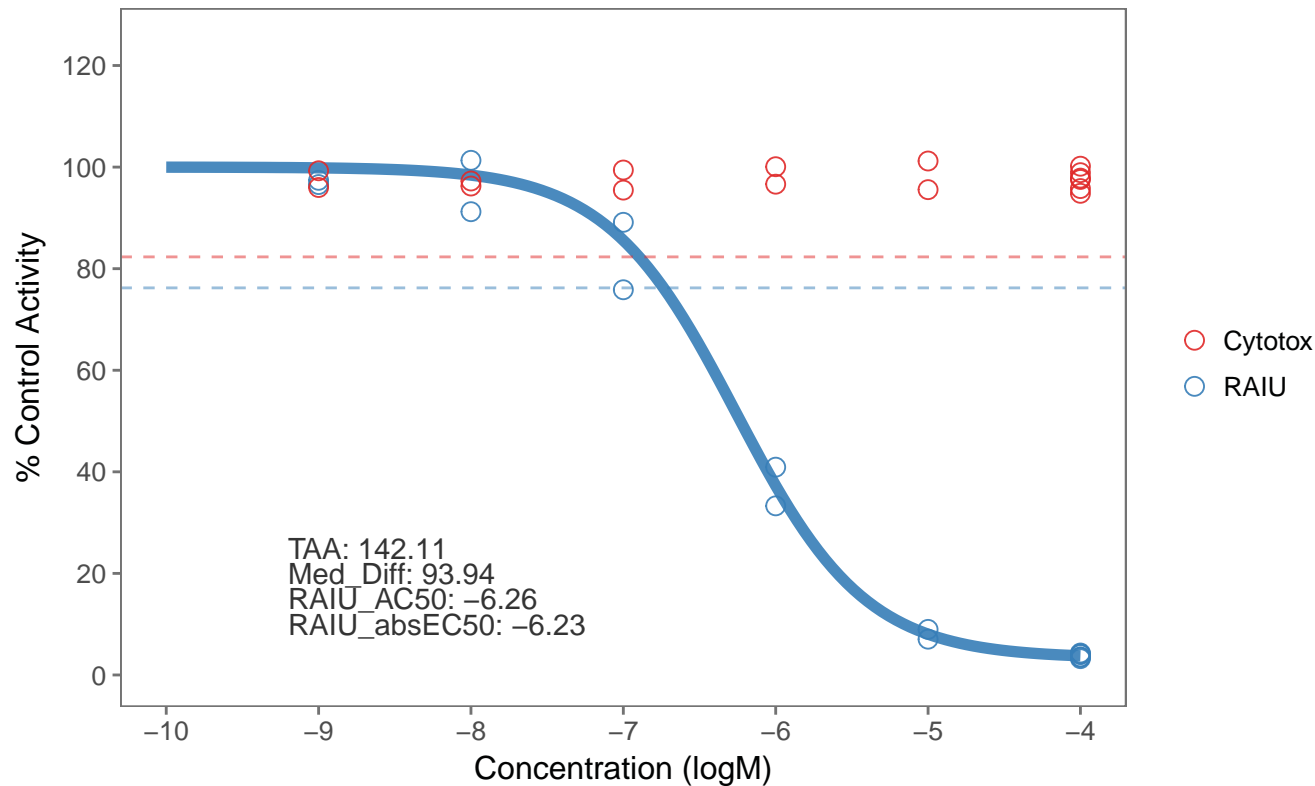

51 . SPID: NaClO4\_Plate\_8\_rep3

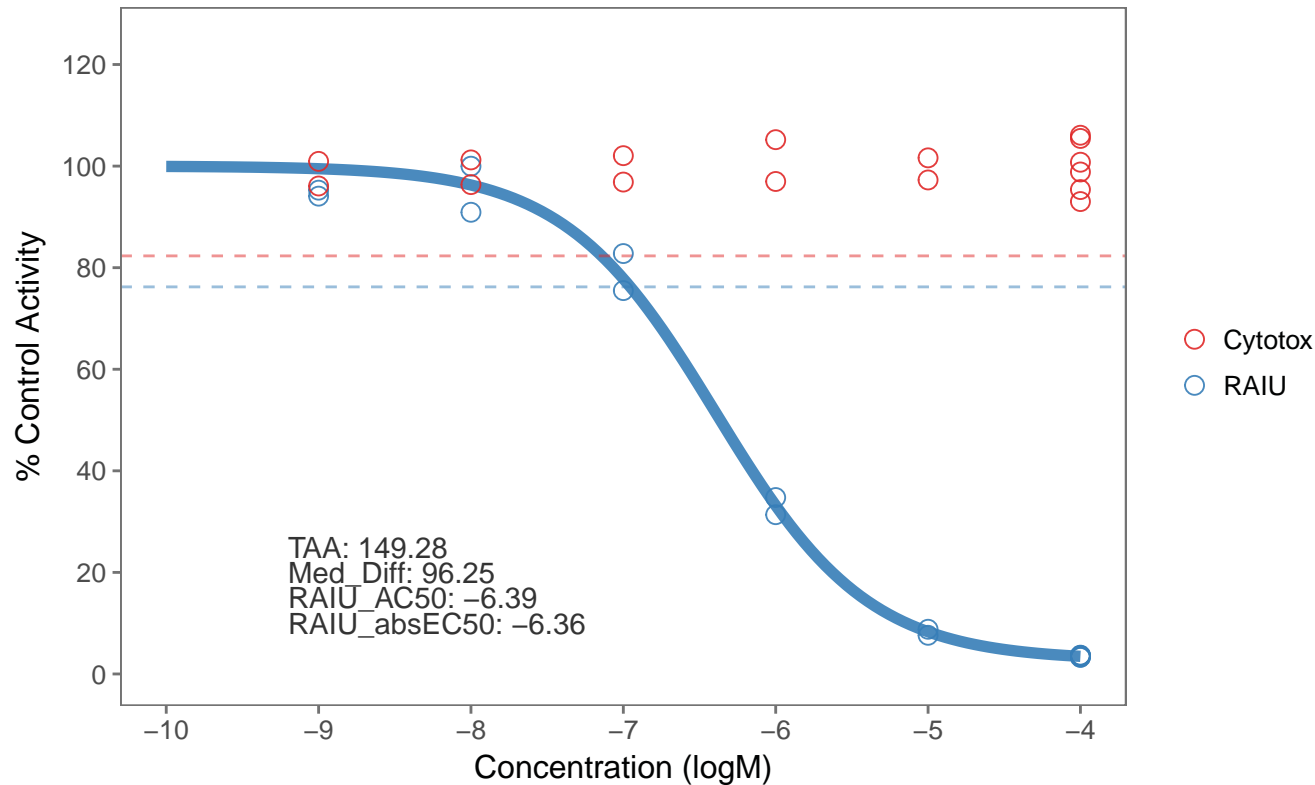

### 52 . SPID: NaClO4\_Plate\_9\_rep1

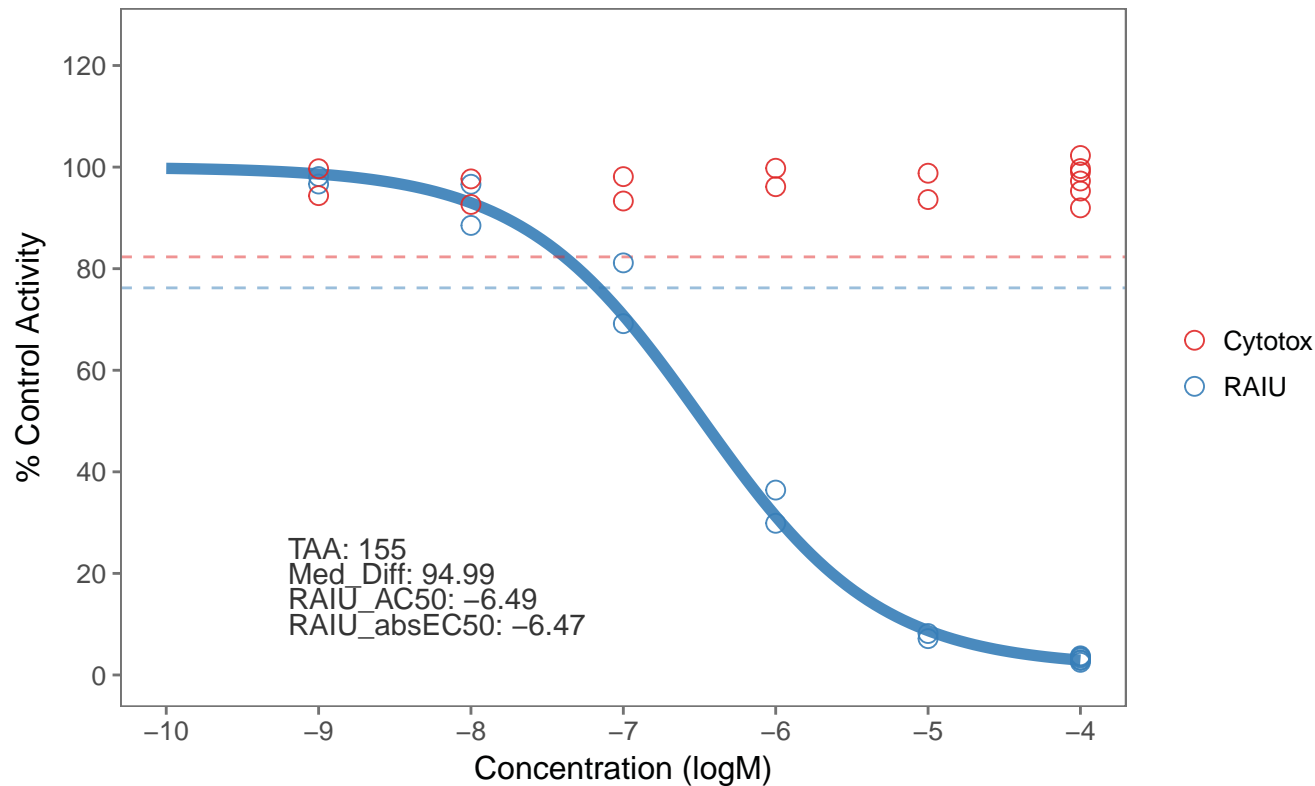

53 . SPID: NaClO4\_Plate\_9\_rep2

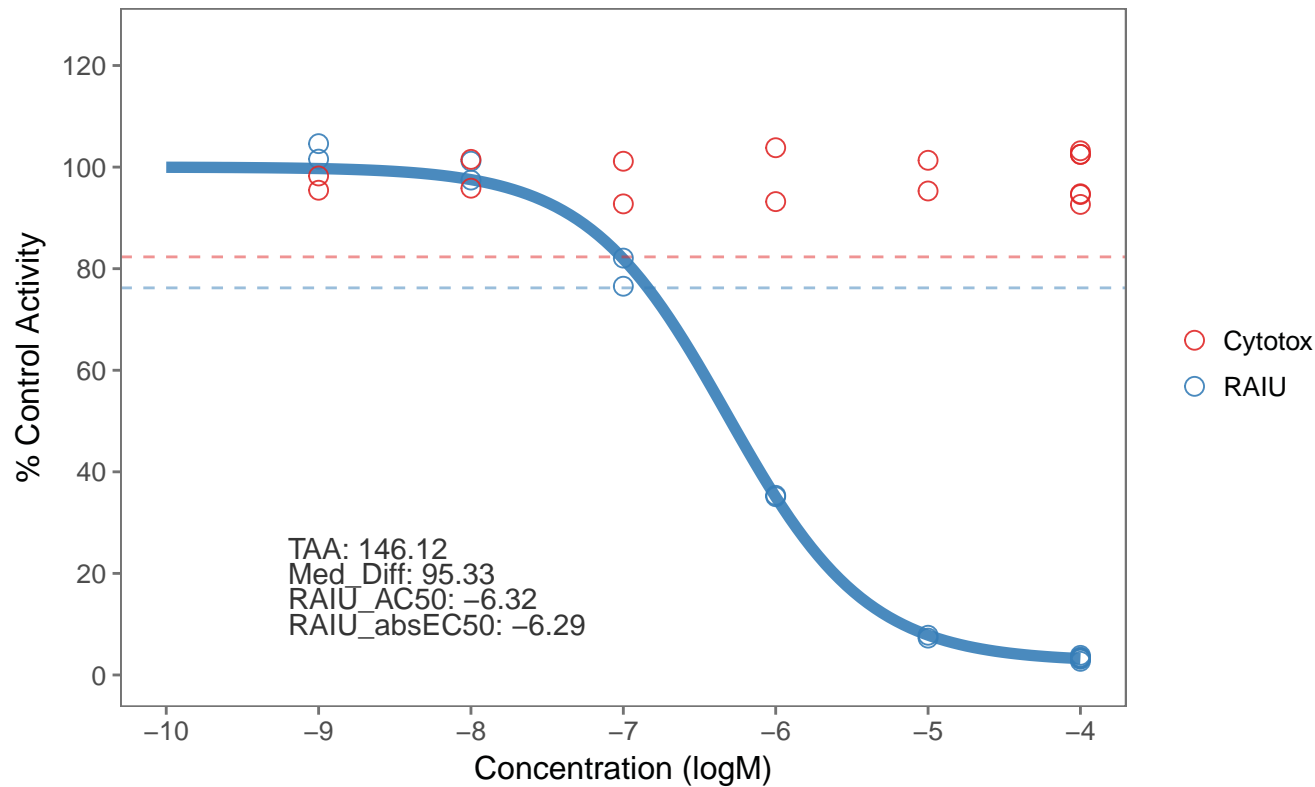

54 . SPID: NaClO4\_Plate\_9\_rep3

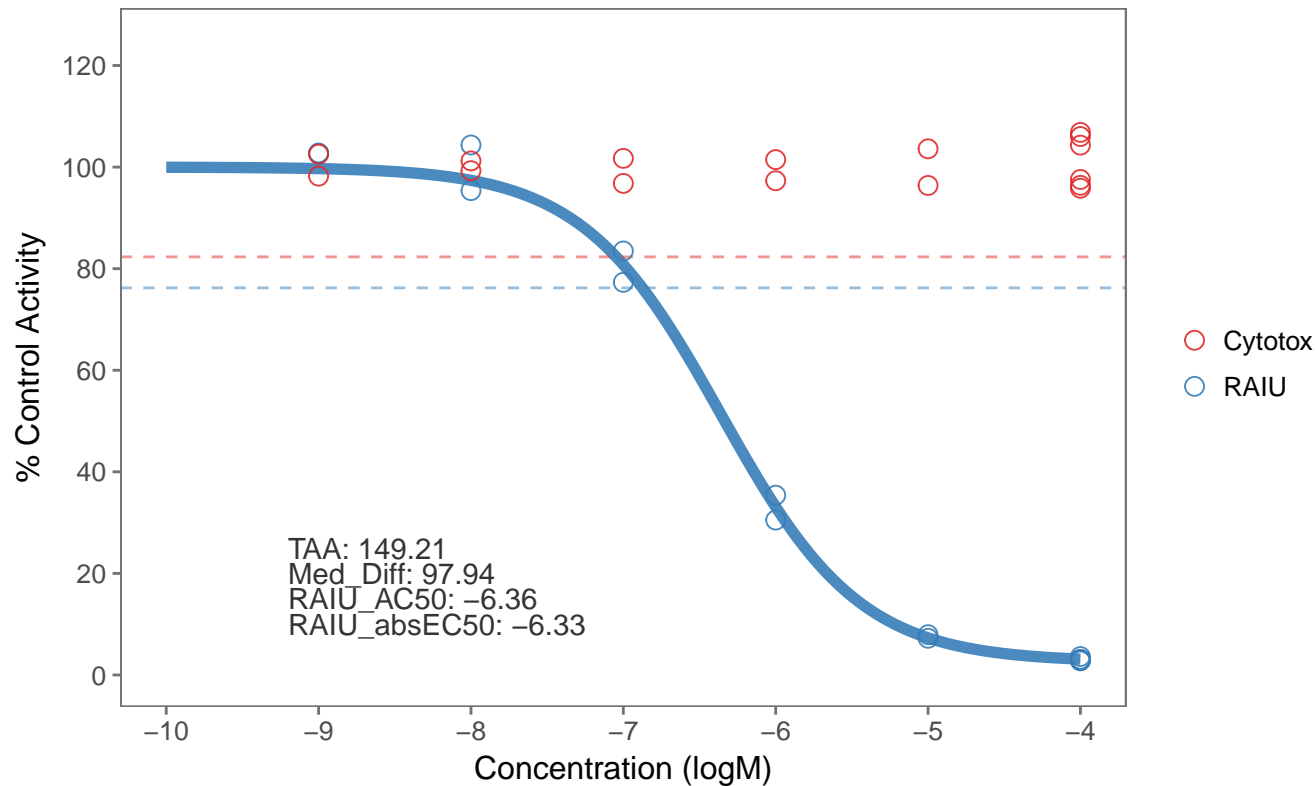

1 . SPID: DCNQ\_Plate\_1\_rep1

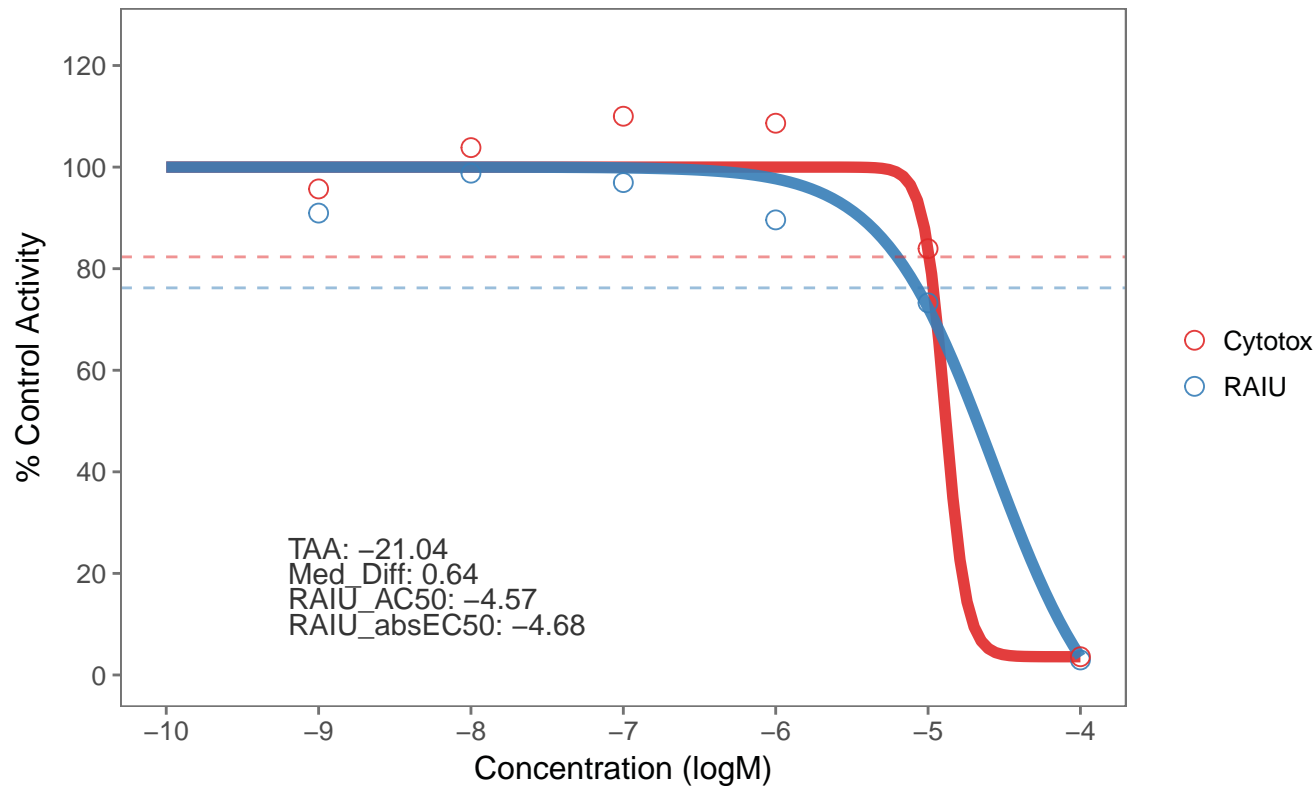

2 . SPID: DCNQ\_Plate\_1\_rep2

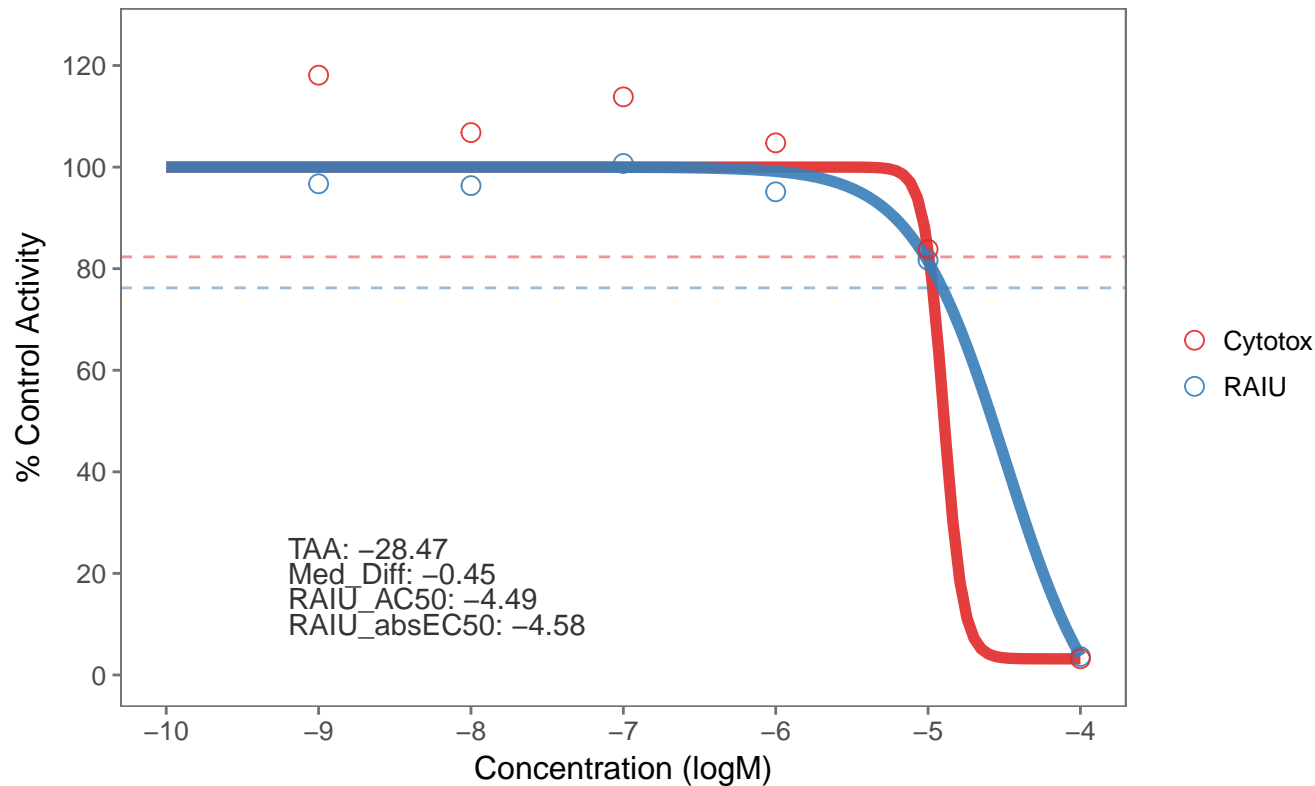

### 3 . SPID: DCNQ\_Plate\_1\_rep3

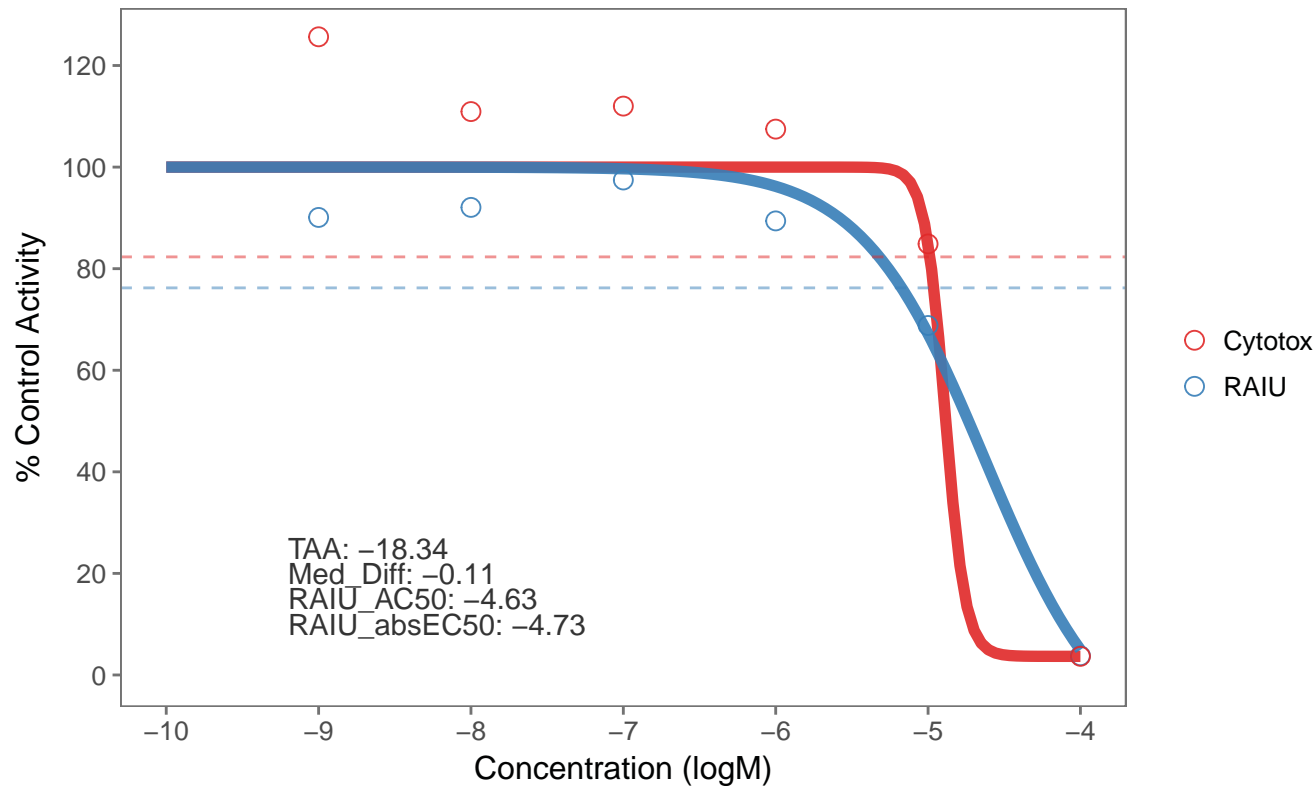



### 4 . SPID: DCNQ\_Plate\_10\_rep1

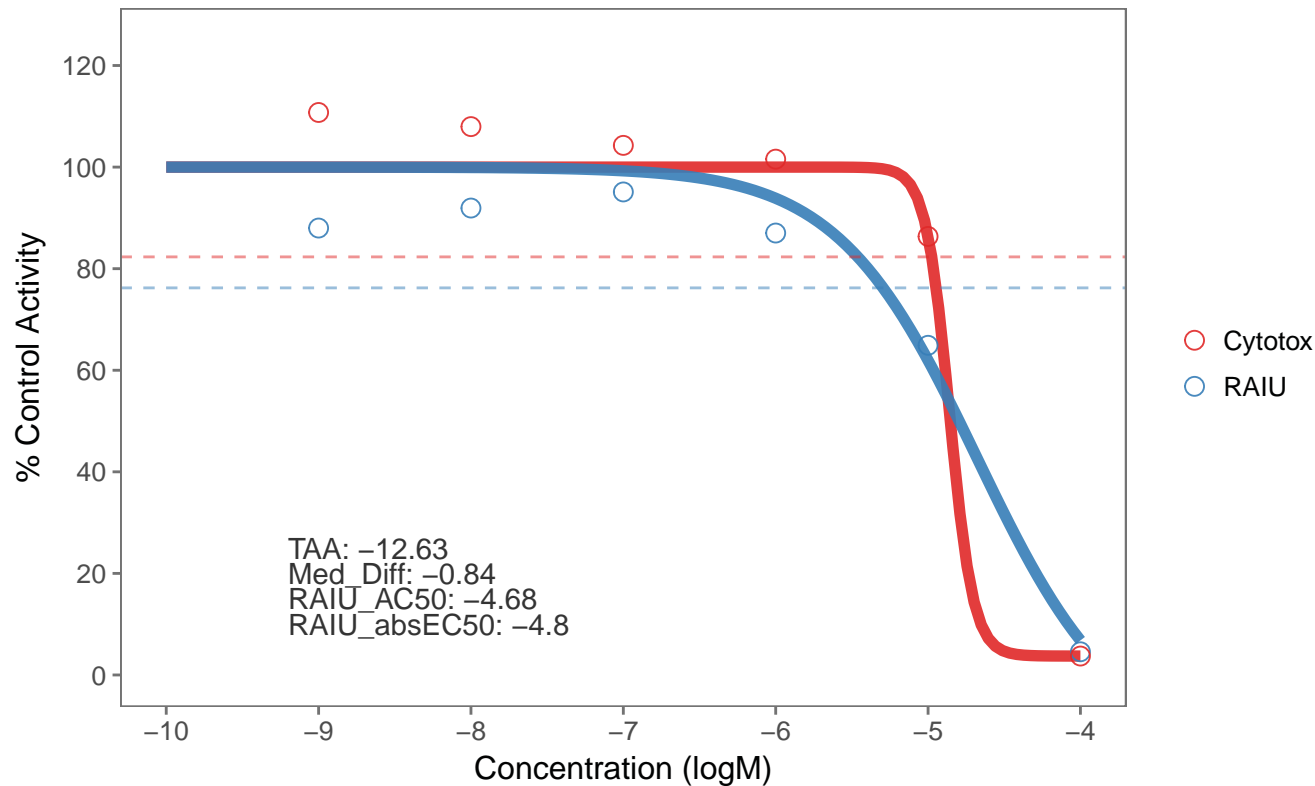

5 . SPID: DCNQ\_Plate\_10\_rep2

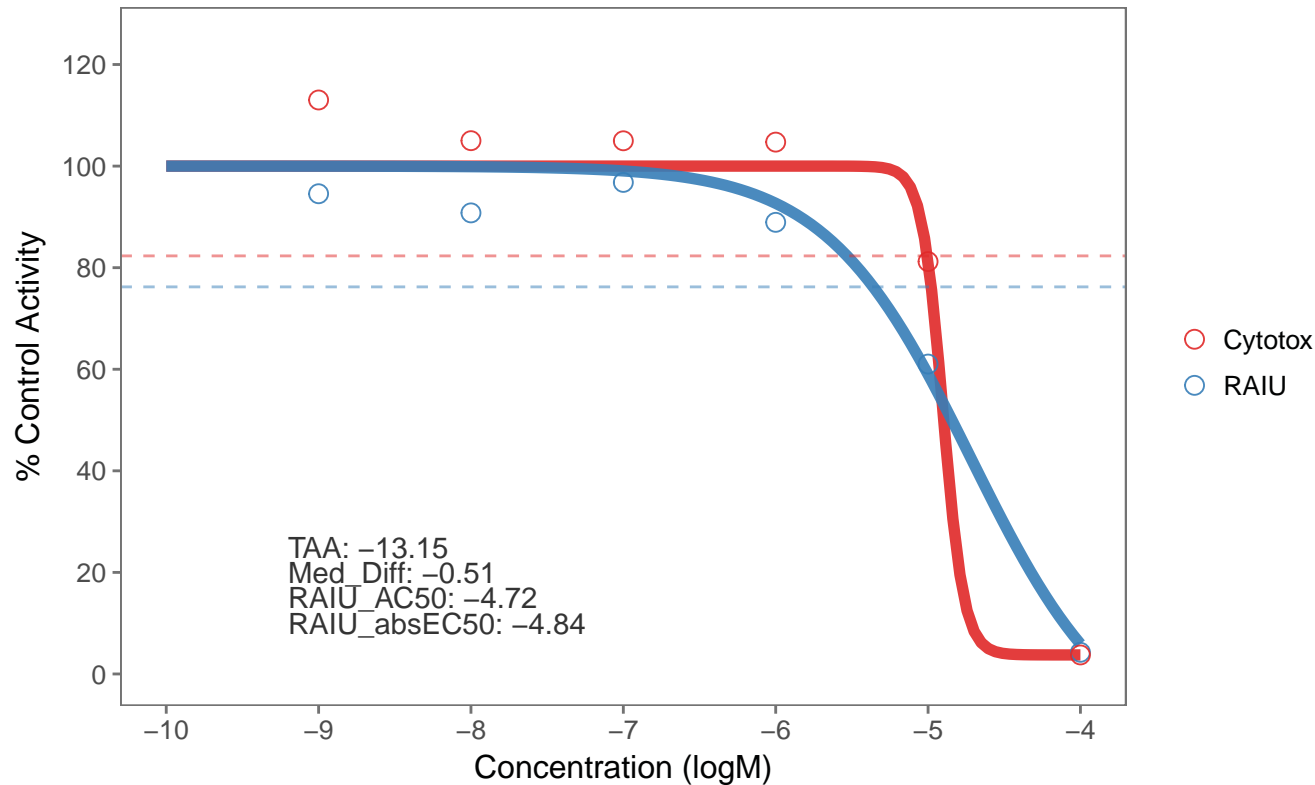

### 6 . SPID: DCNQ\_Plate\_10\_rep3

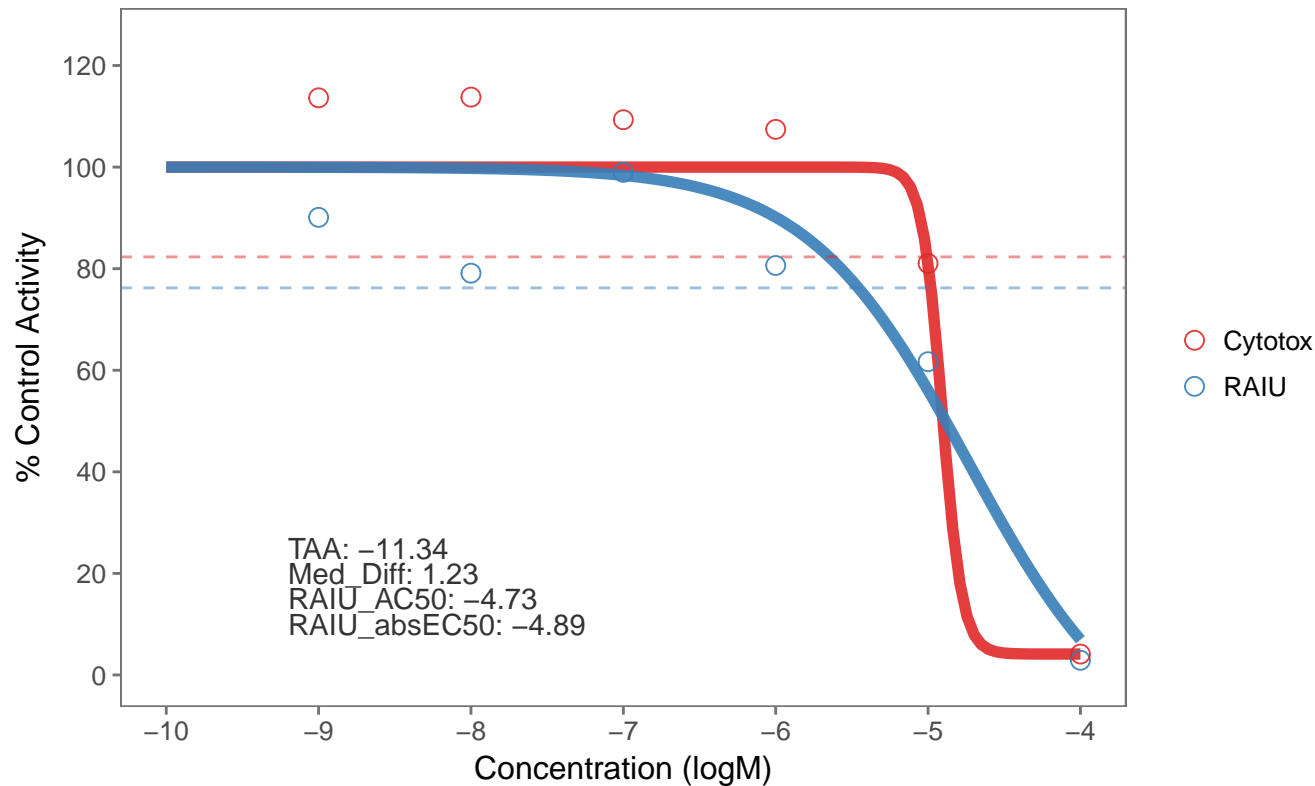

### 7 . SPID: DCNQ\_Plate\_11\_rep1

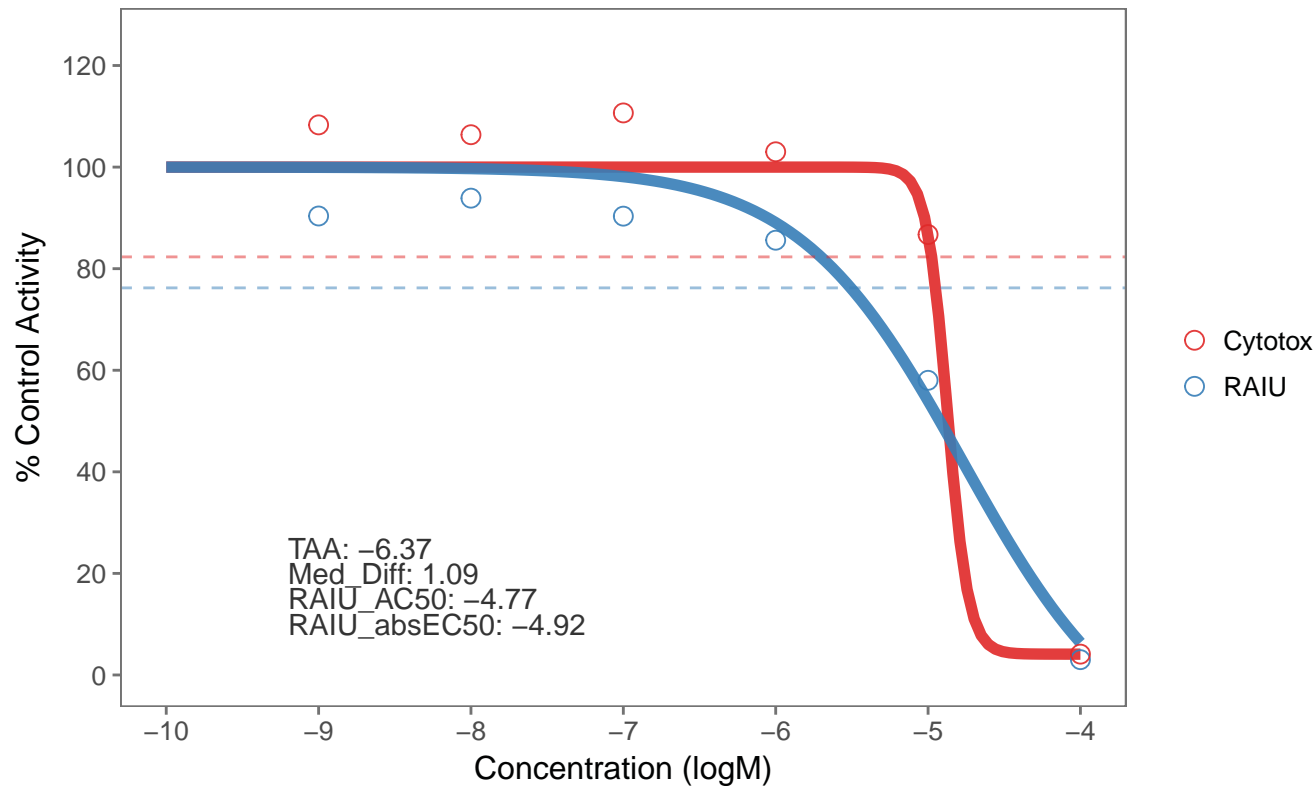

### 8 . SPID: DCNQ\_Plate\_11\_rep2

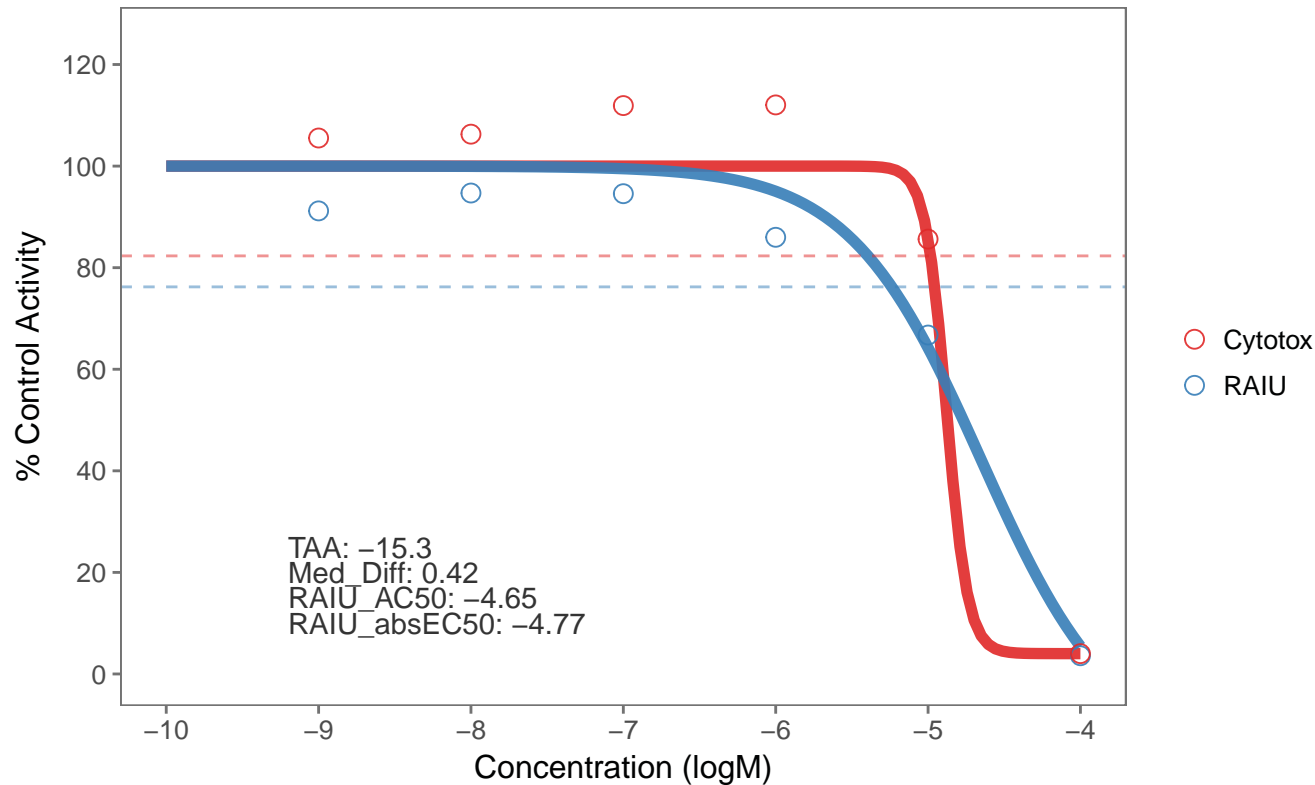

9 . SPID: DCNQ\_Plate\_11\_rep3

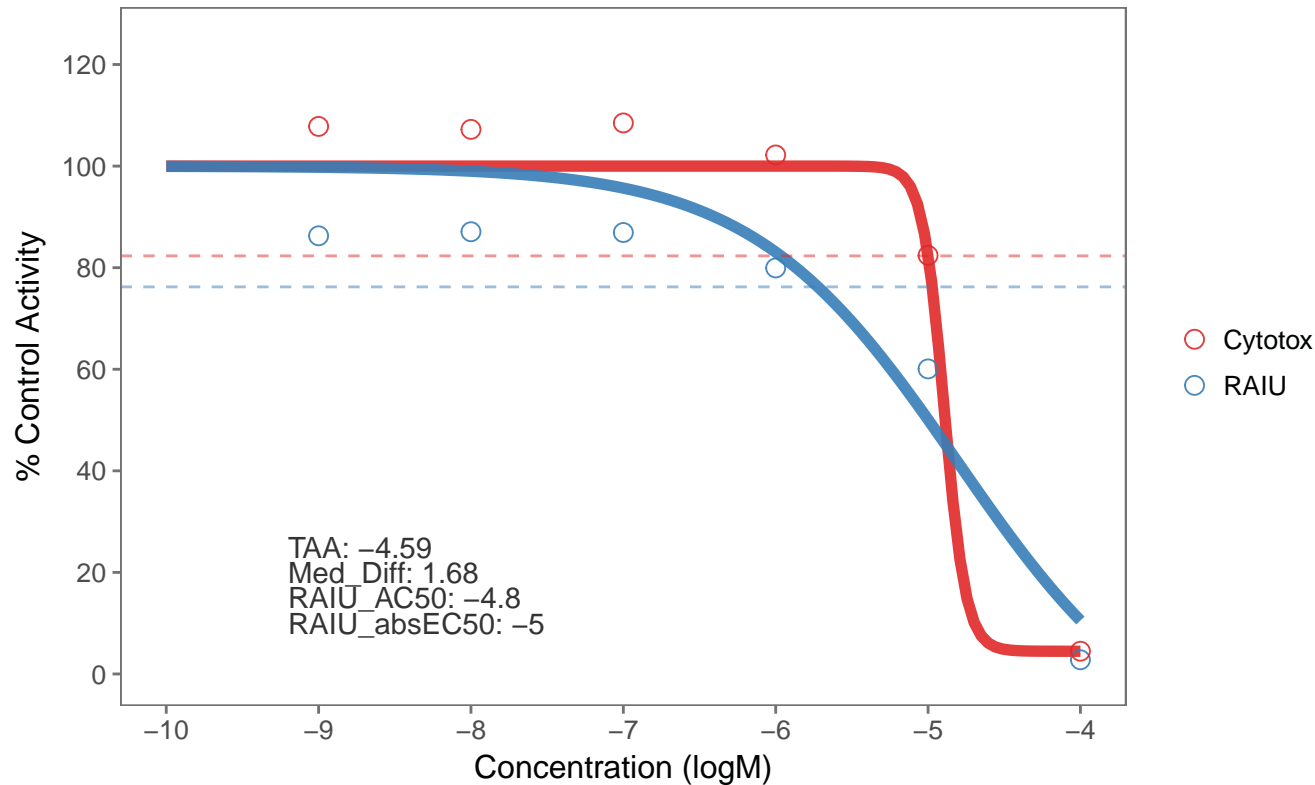

10 . SPID: DCNQ\_Plate\_12\_rep1

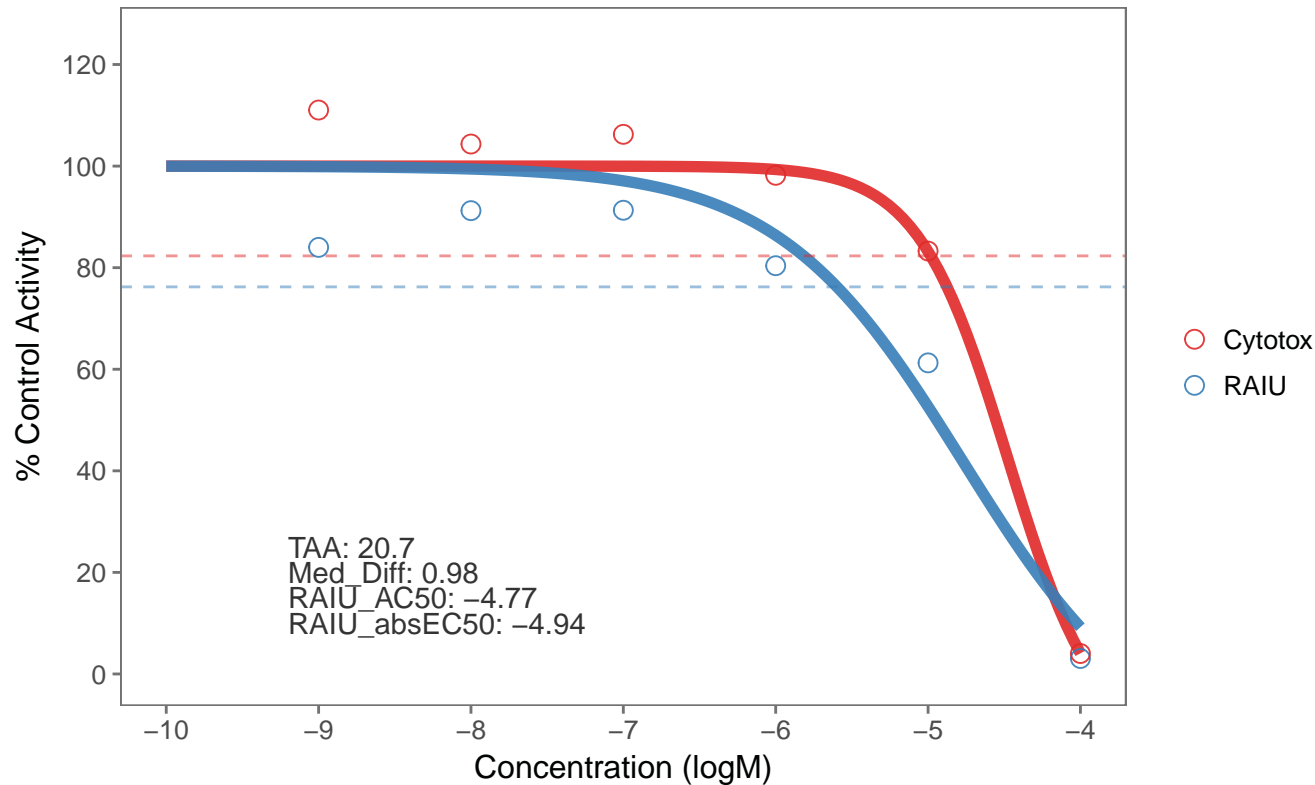

11 . SPID: DCNQ\_Plate\_12\_rep2

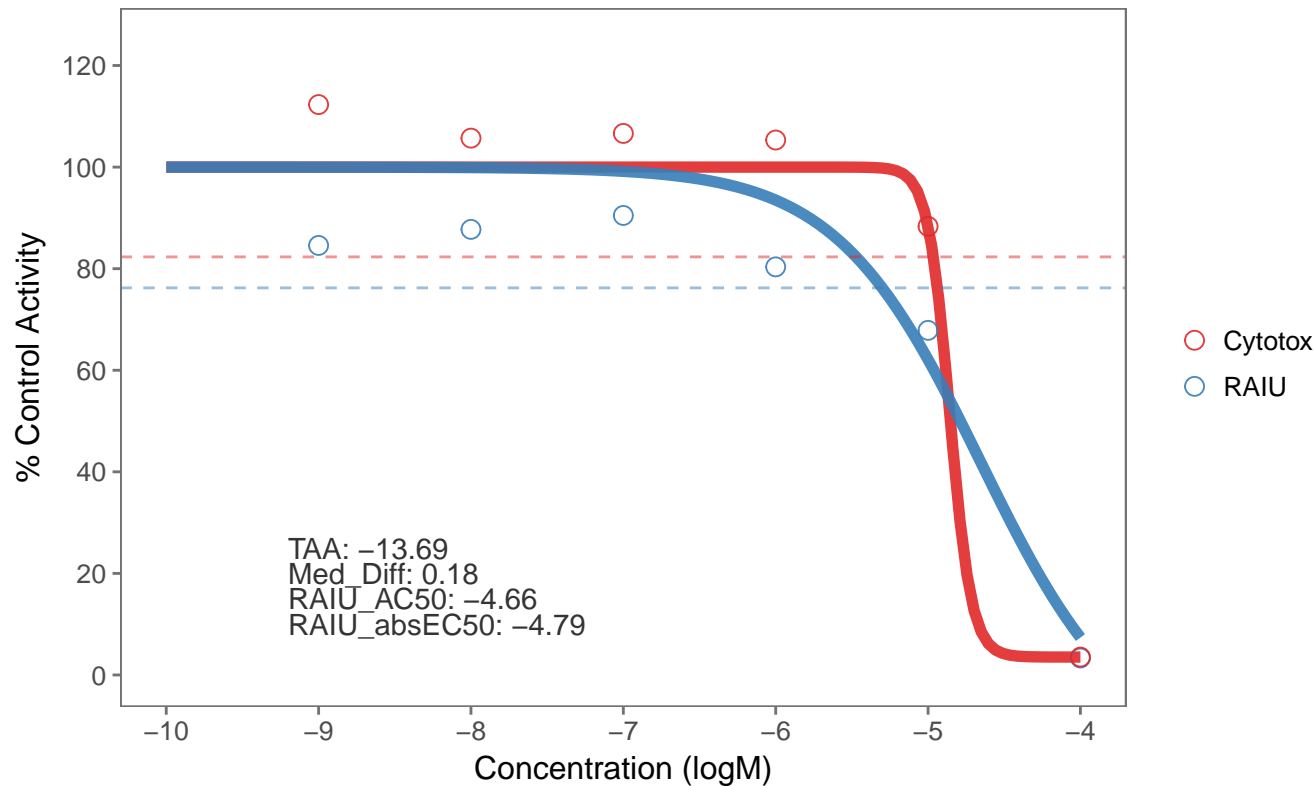



12 . SPID: DCNQ\_Plate\_12\_rep3

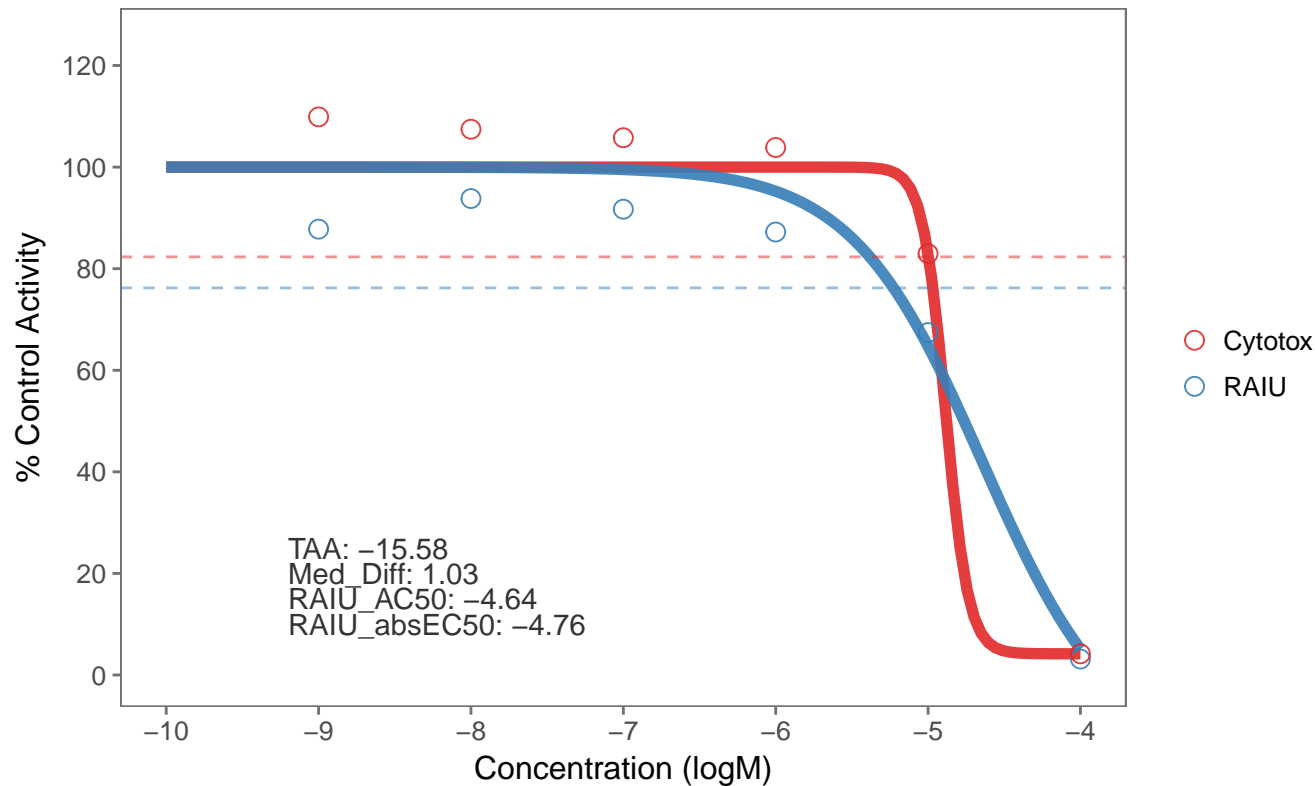

13 . SPID: DCNQ\_Plate\_13\_rep1

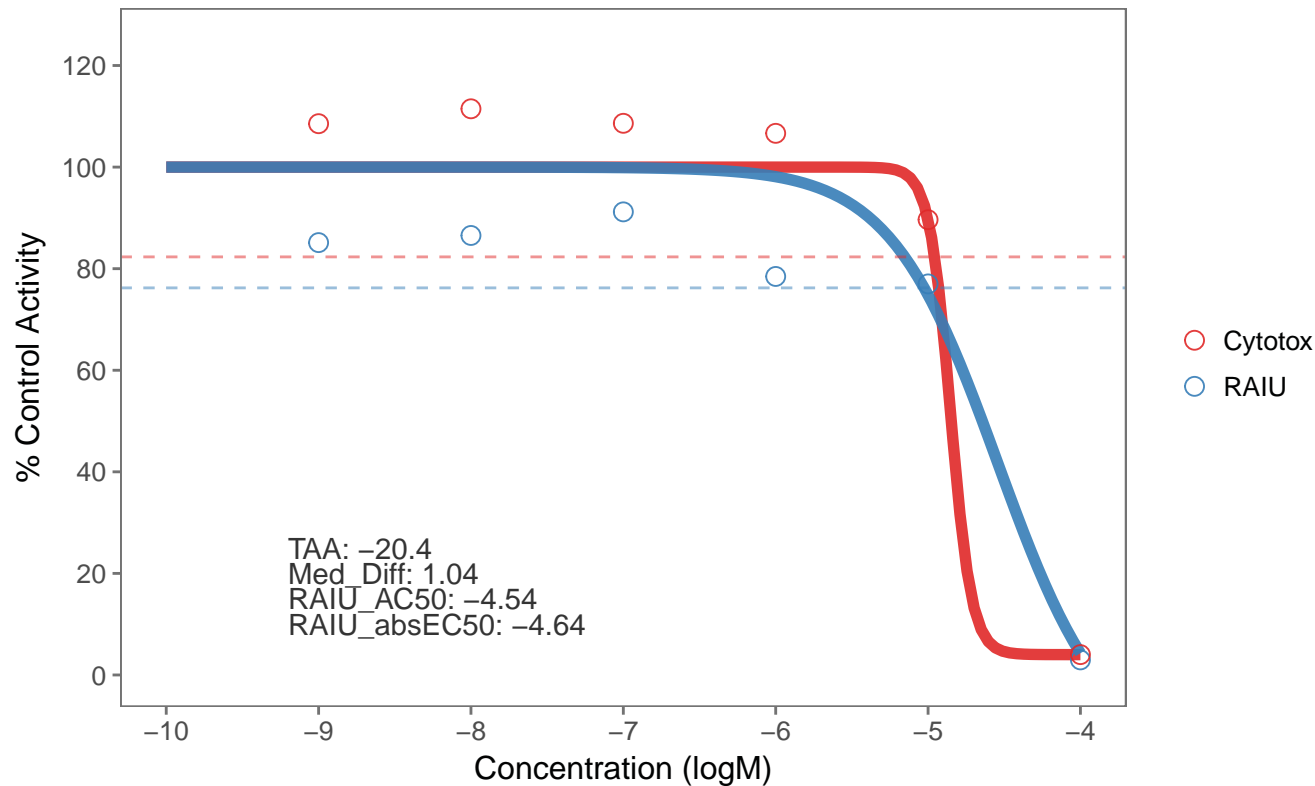

14 . SPID: DCNQ\_Plate\_13\_rep2

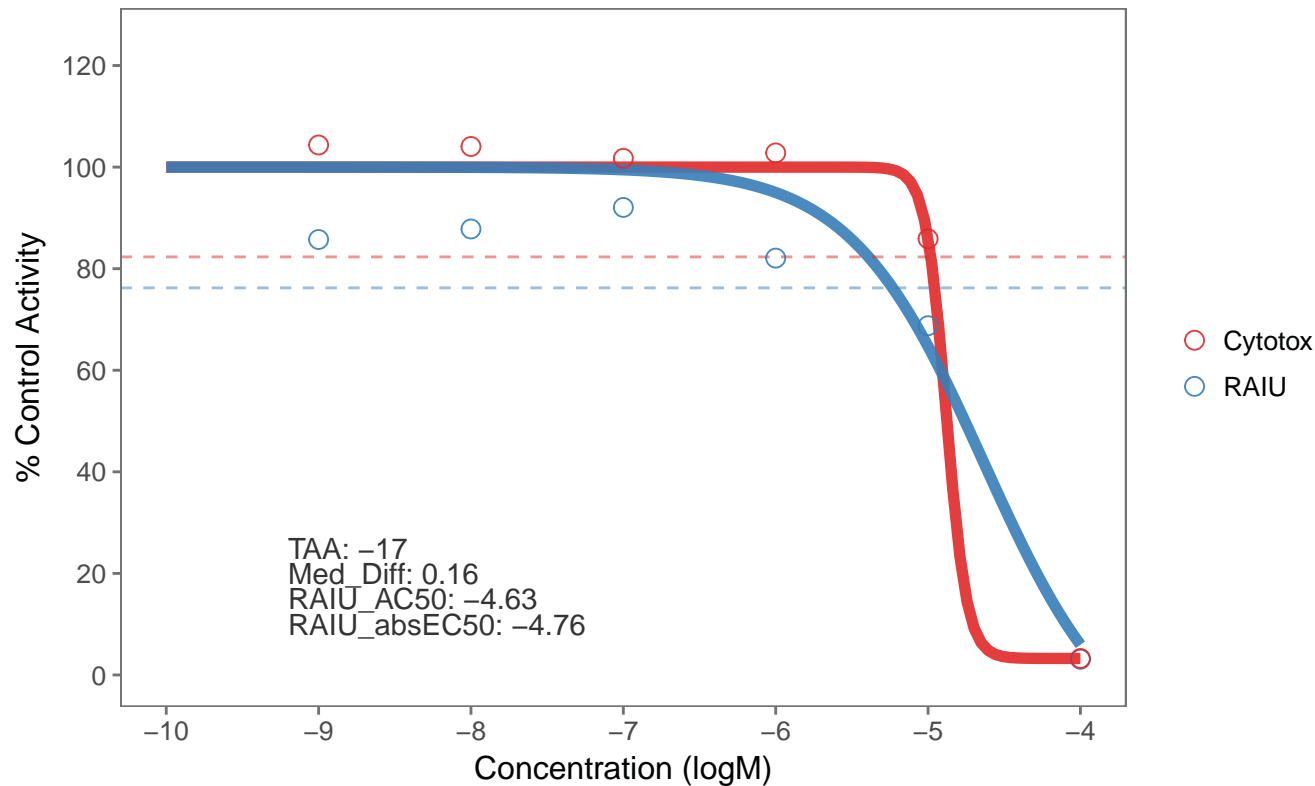

15 . SPID: DCNQ\_Plate\_13\_rep3

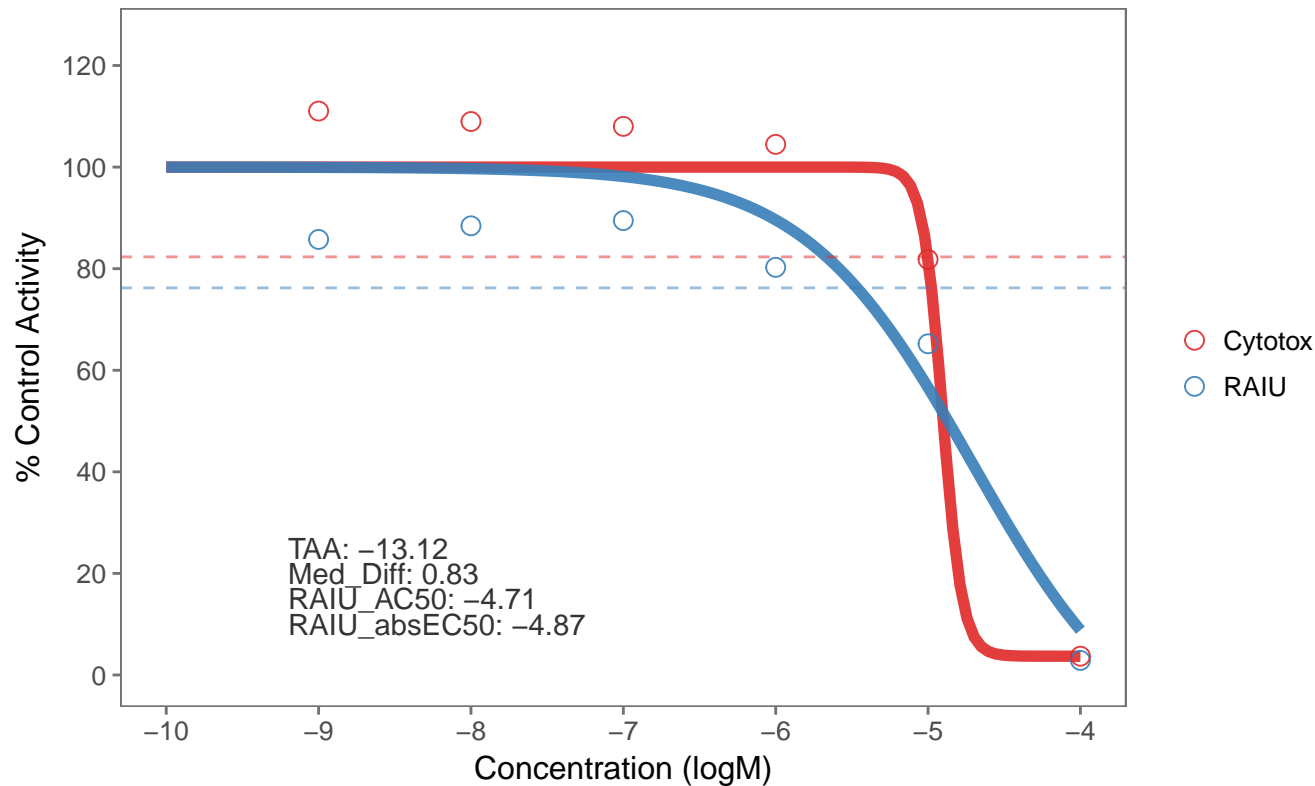

16 . SPID: DCNQ\_Plate\_14\_rep1

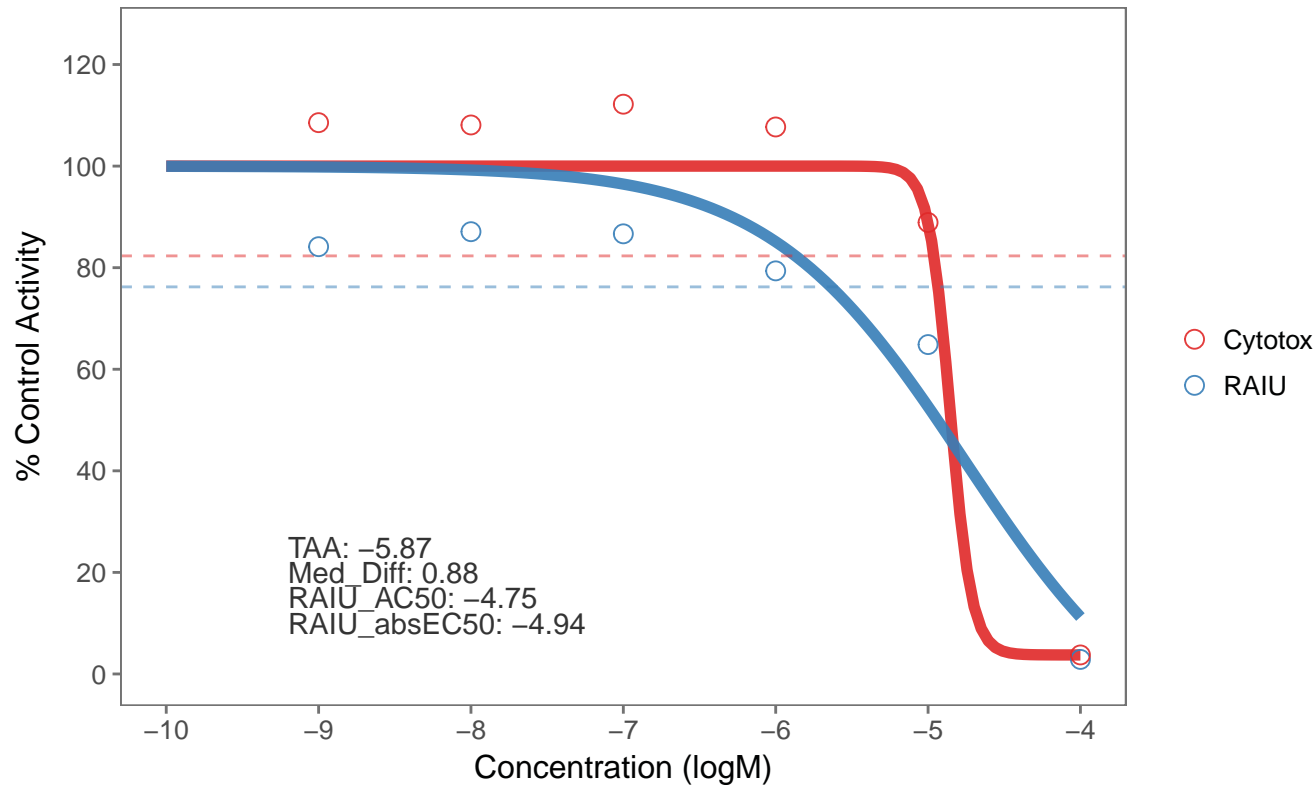

17 . SPID: DCNQ\_Plate\_14\_rep2

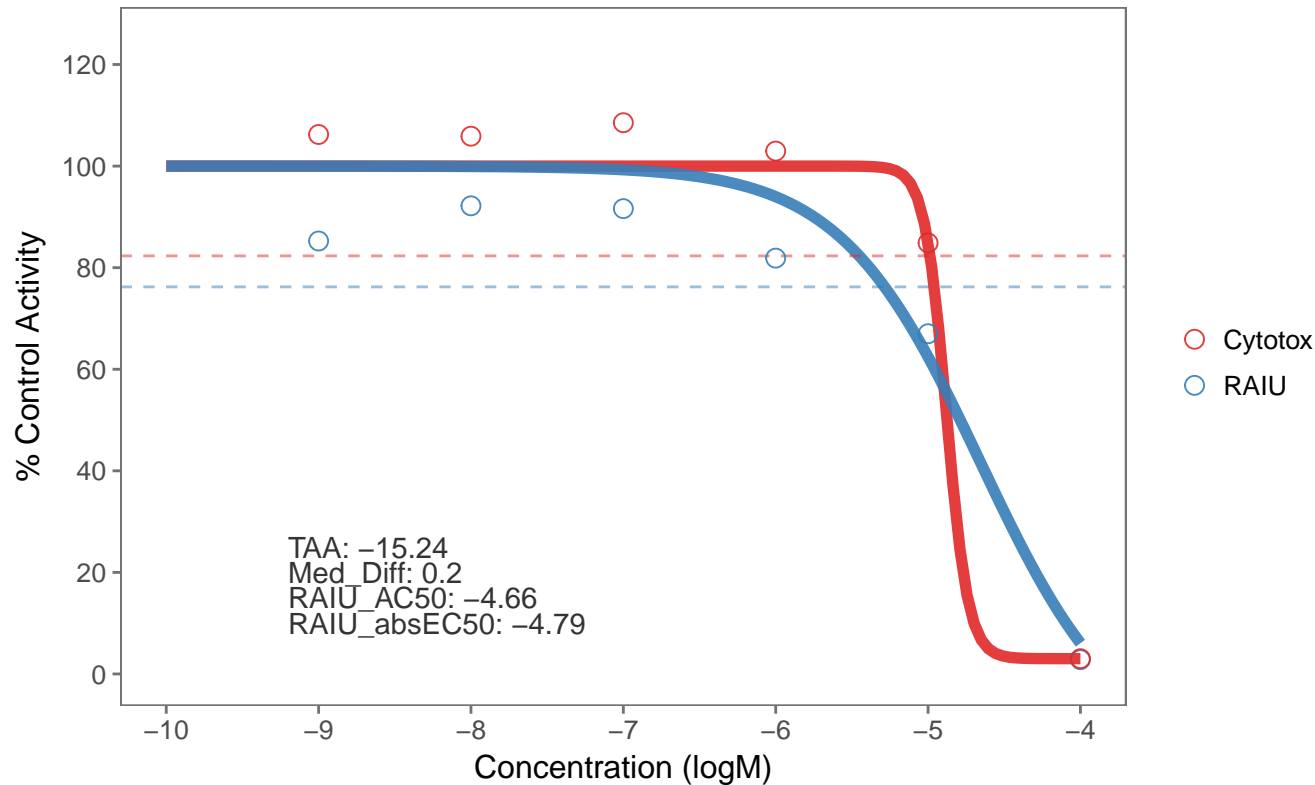

18 . SPID: DCNQ\_Plate\_14\_rep3

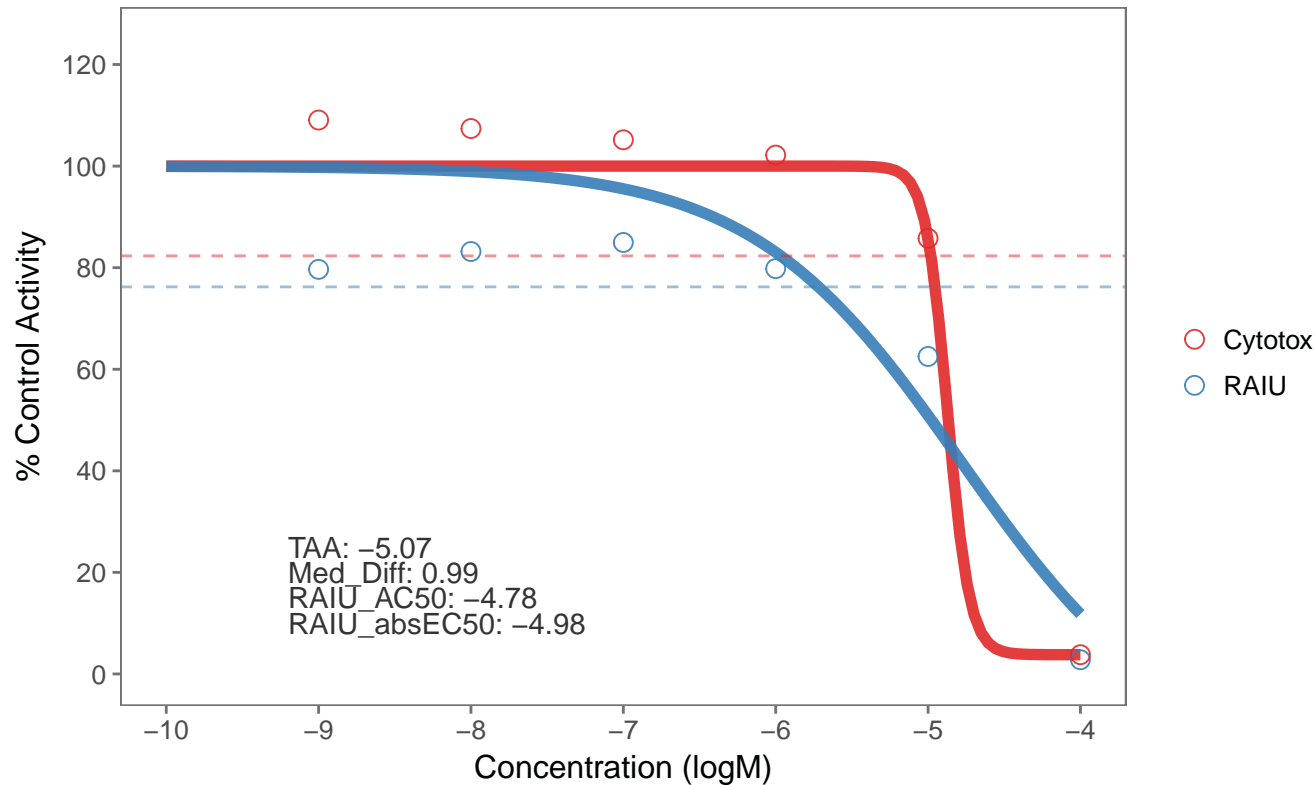

19 . SPID: DCNQ\_Plate\_15\_rep1

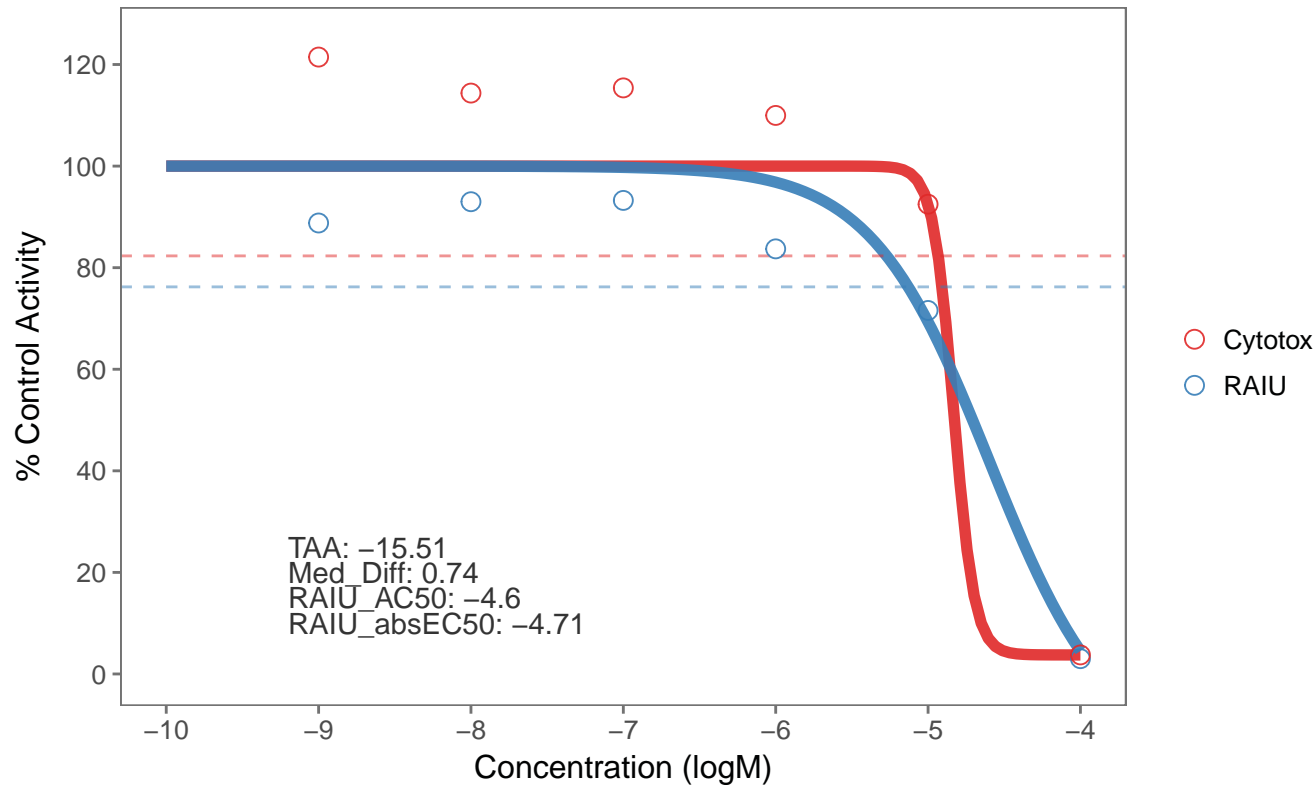



20 . SPID: DCNQ\_Plate\_15\_rep2

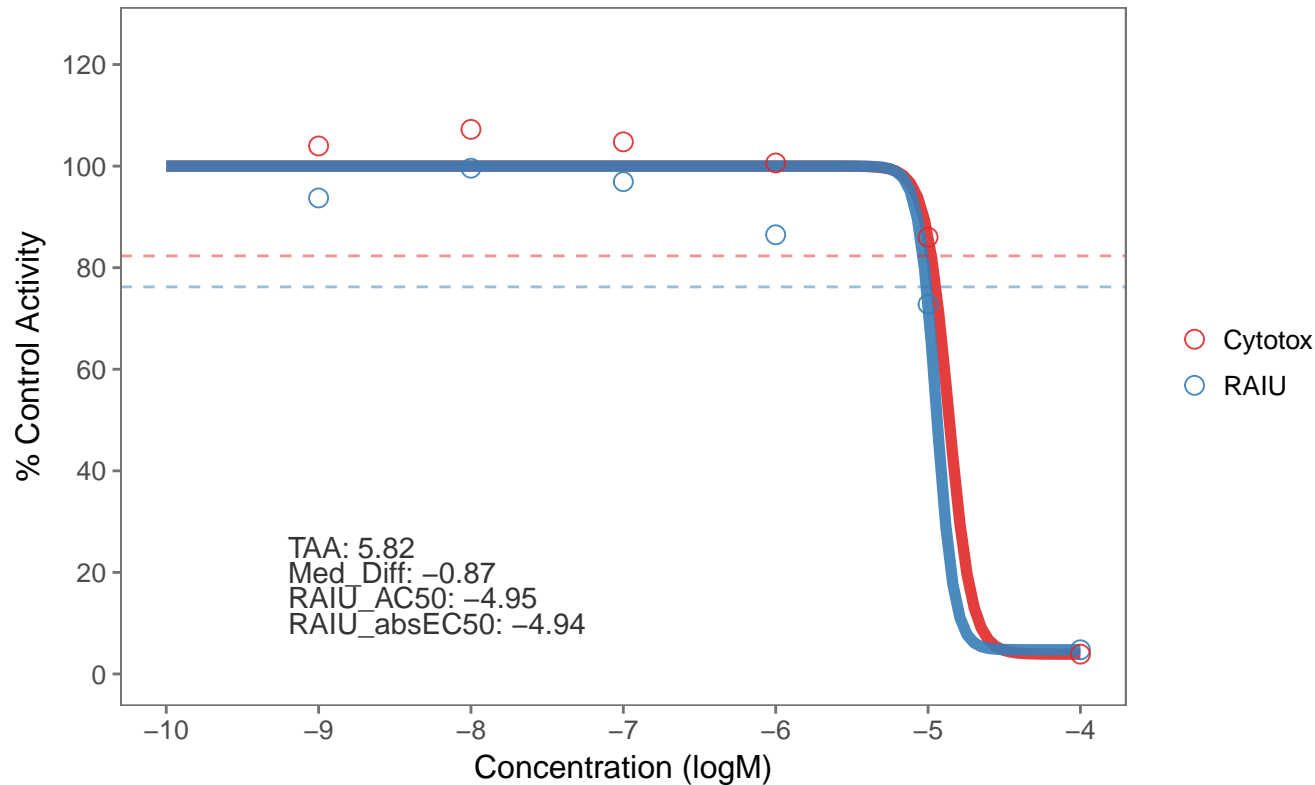

21 . SPID: DCNQ\_Plate\_15\_rep3

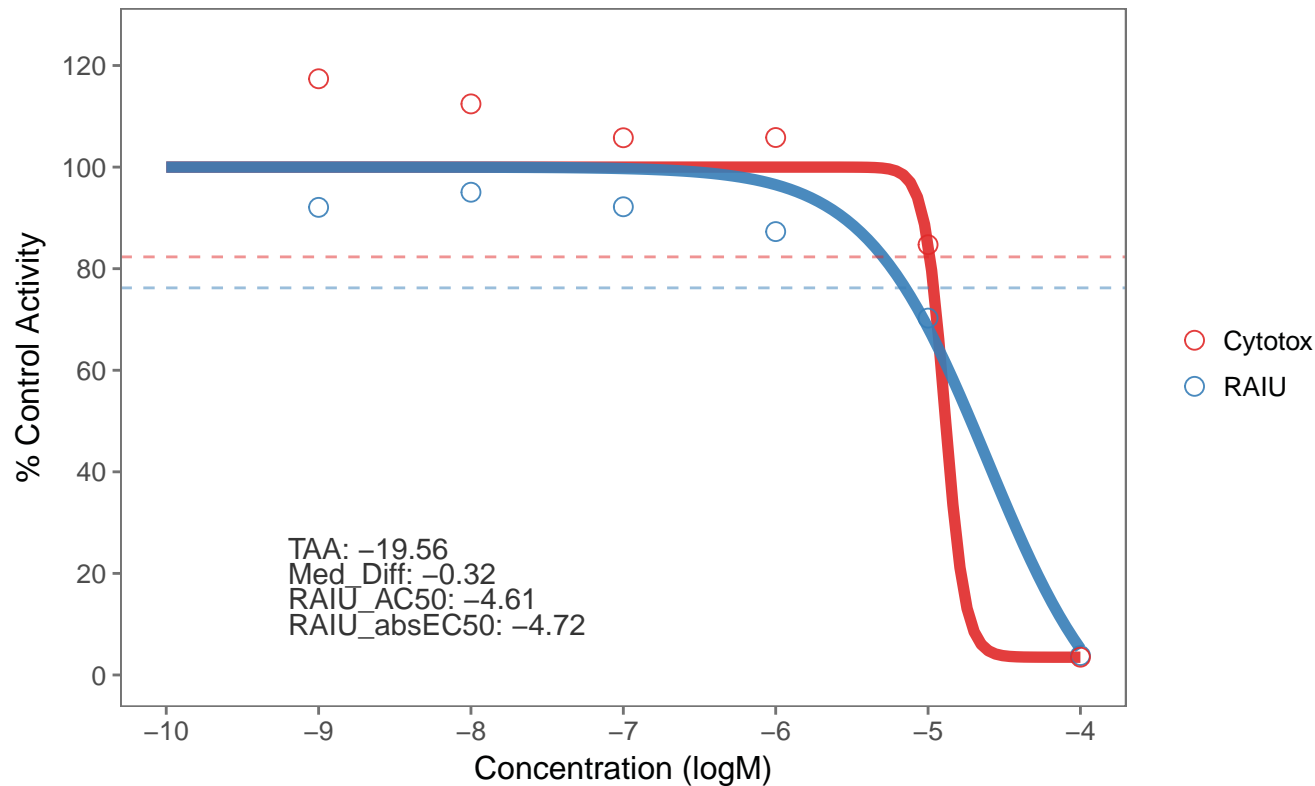

22 . SPID: DCNQ\_Plate\_16\_rep1

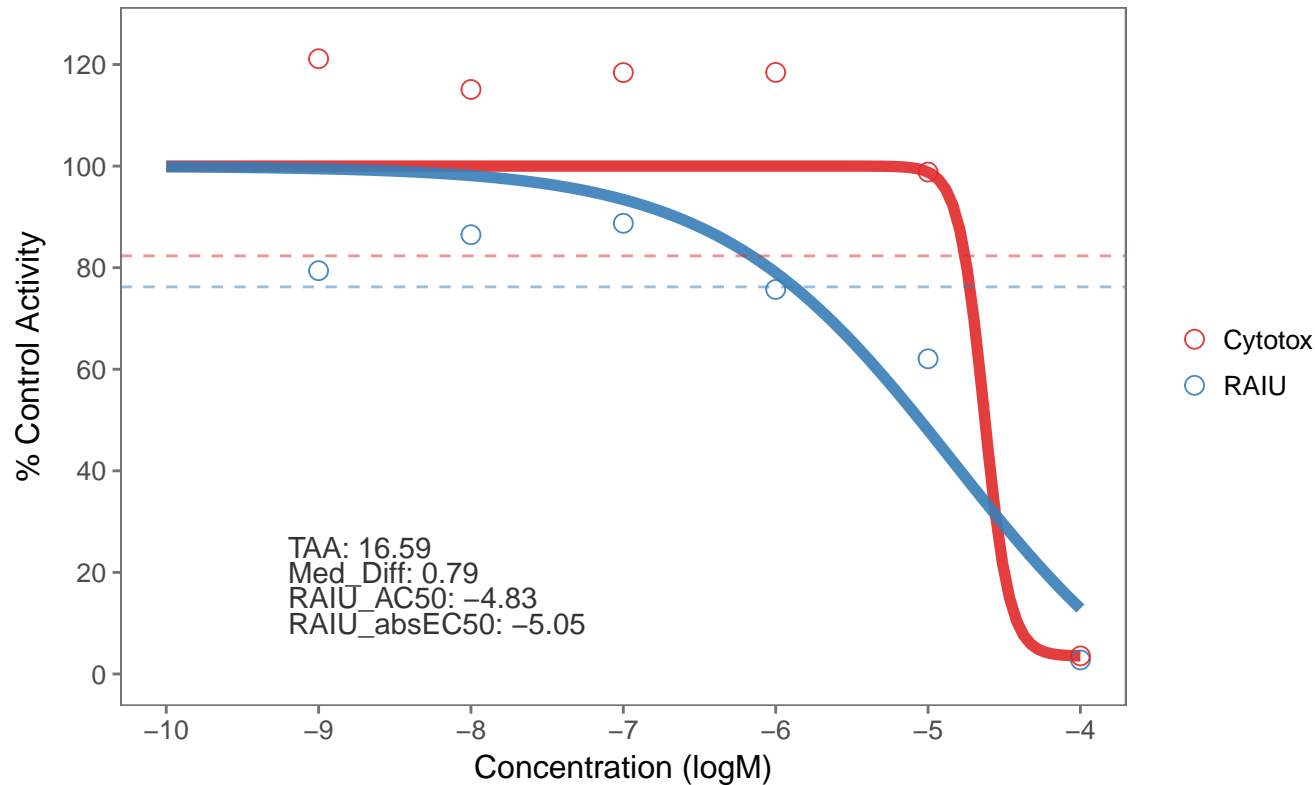

23 . SPID: DCNQ\_Plate\_16\_rep2

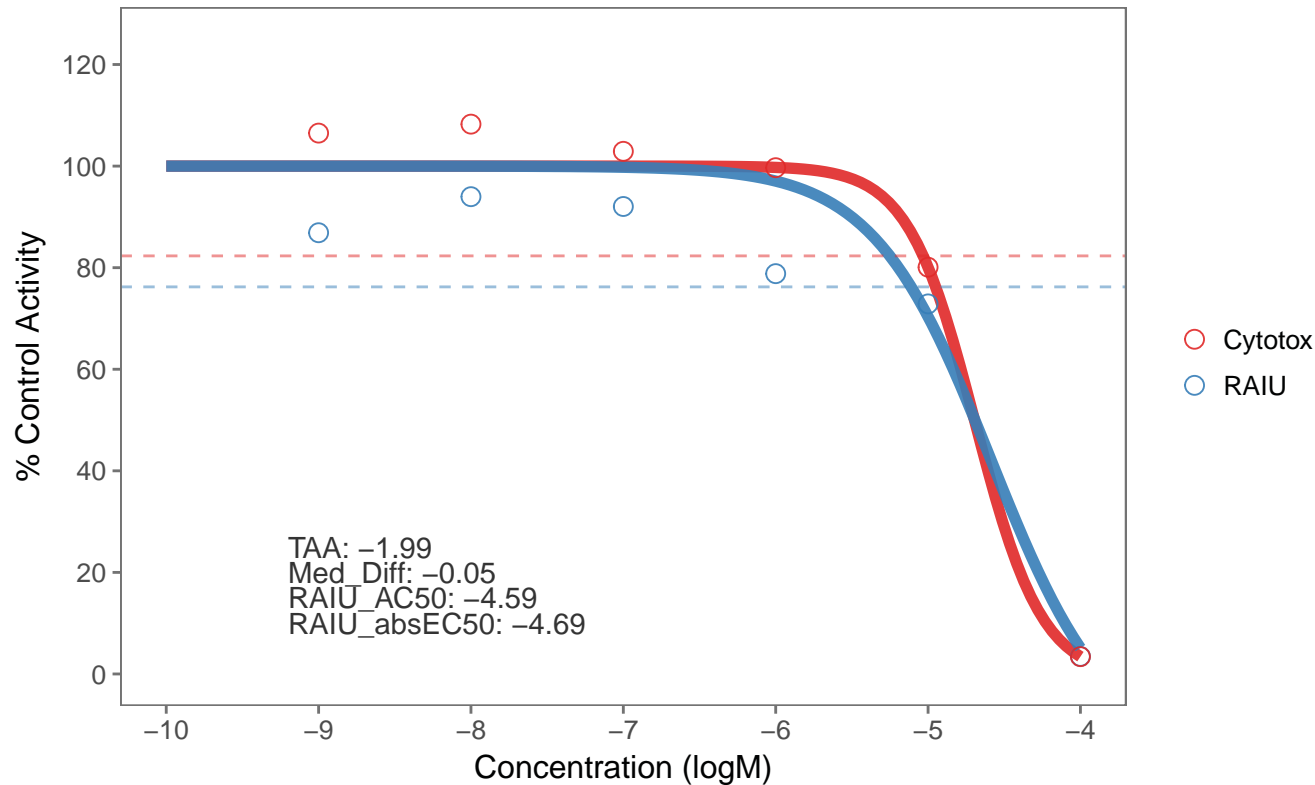

24 . SPID: DCNQ\_Plate\_16\_rep3

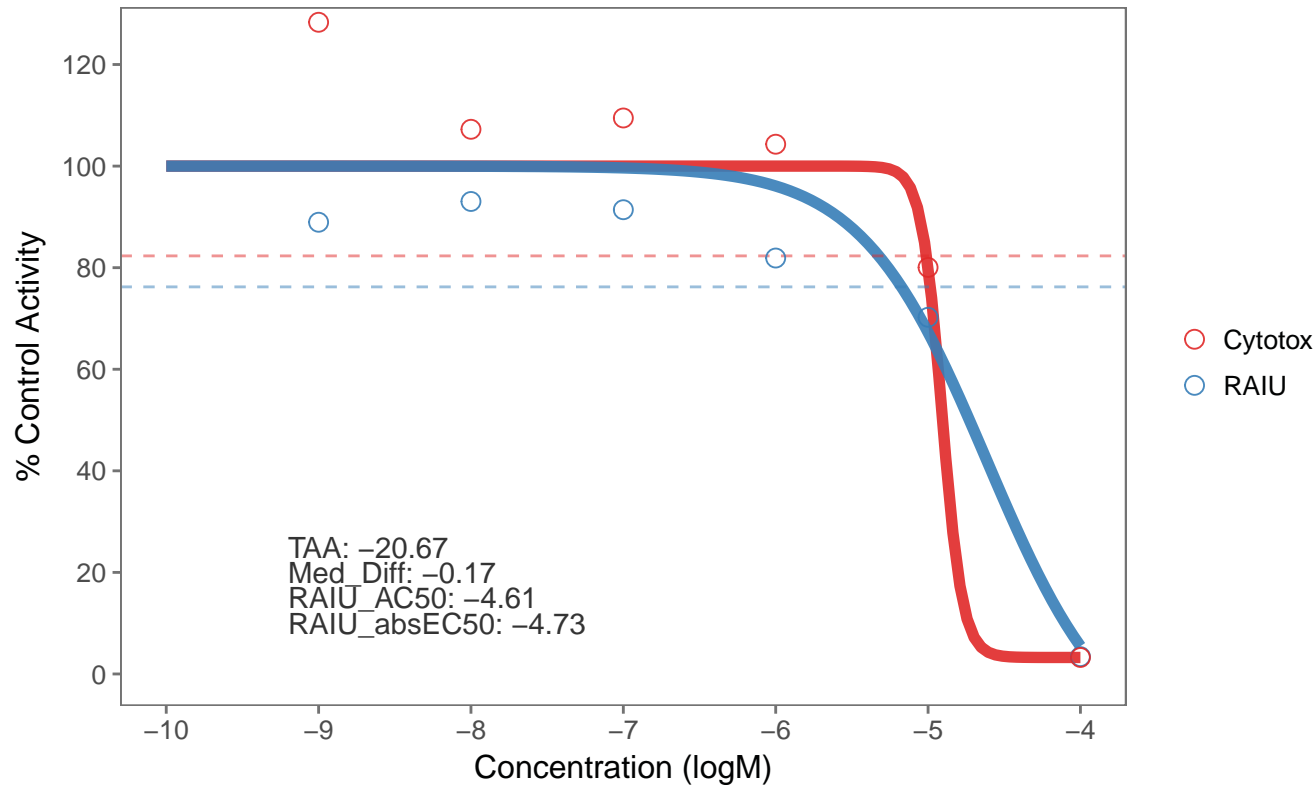

25 . SPID: DCNQ\_Plate\_17\_rep1

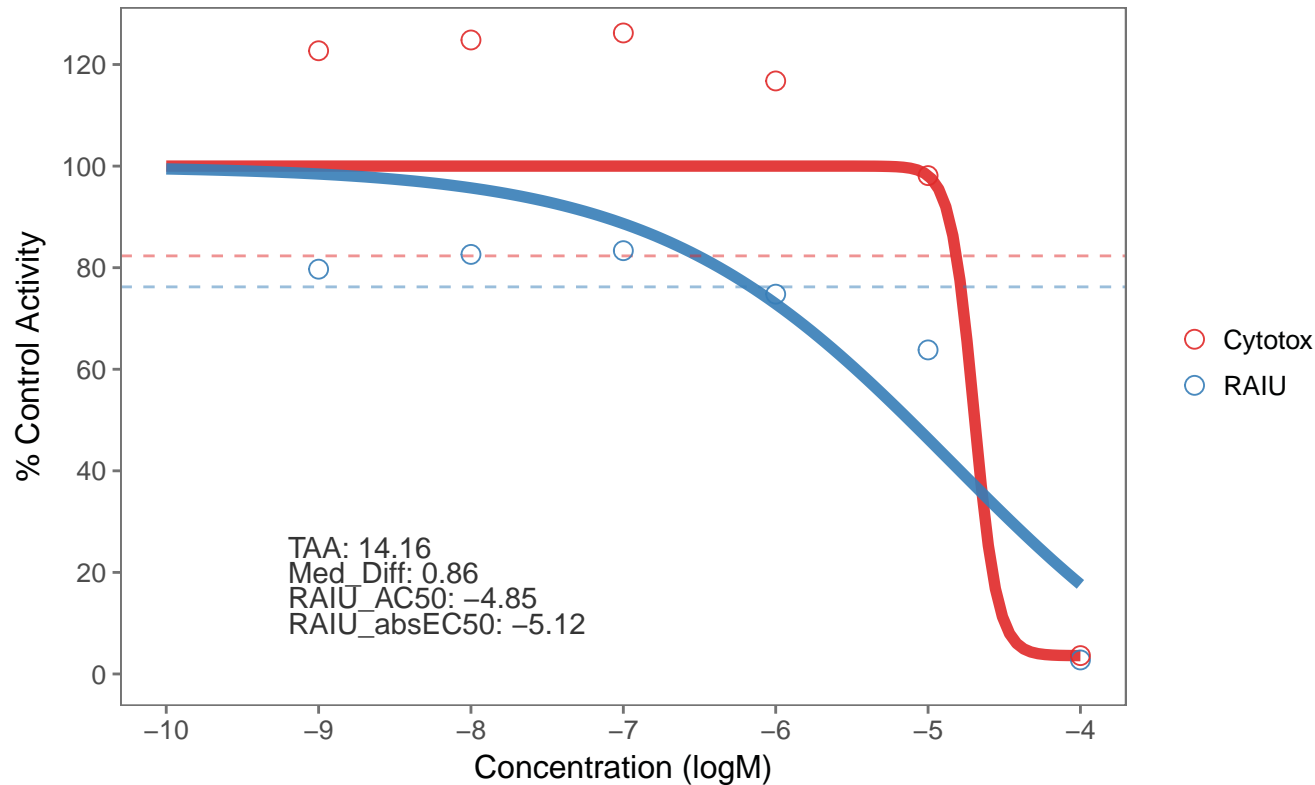

26 . SPID: DCNQ\_Plate\_17\_rep2

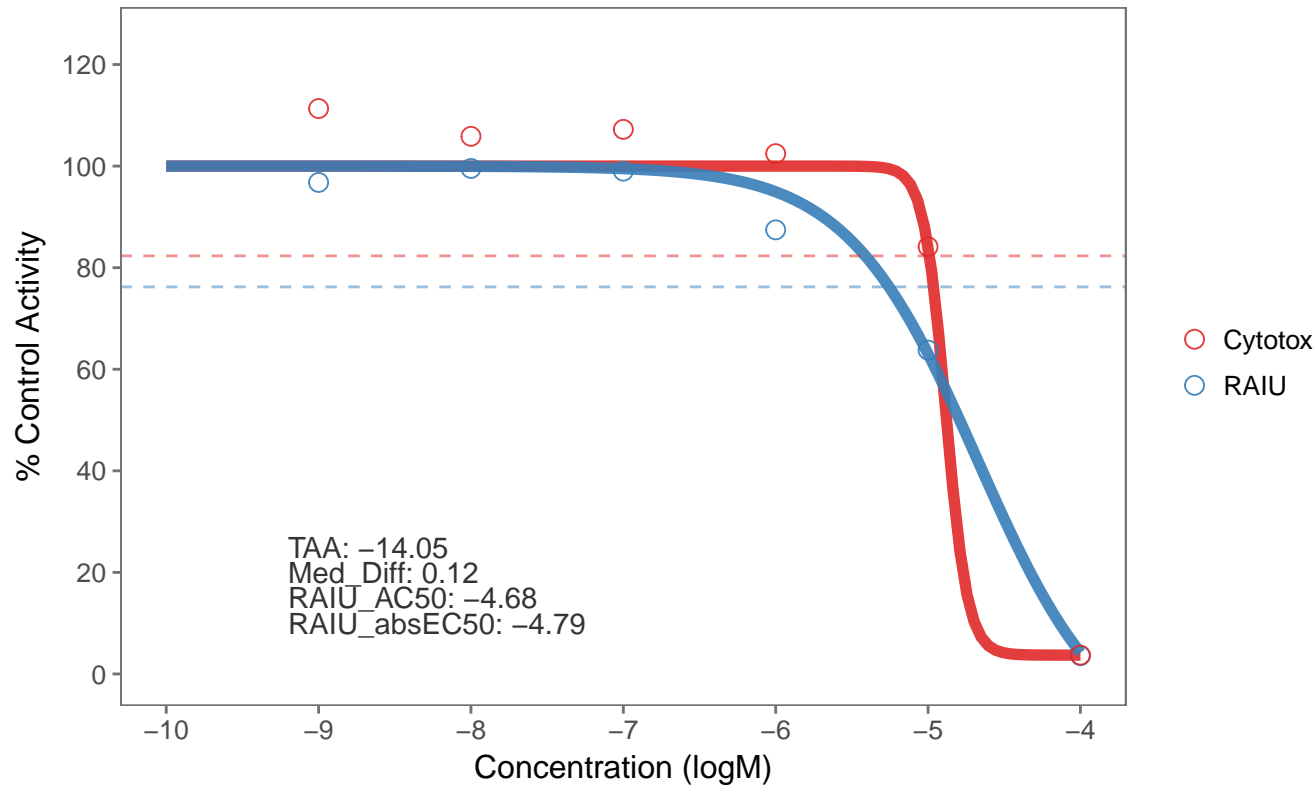

27 . SPID: DCNQ\_Plate\_17\_rep3

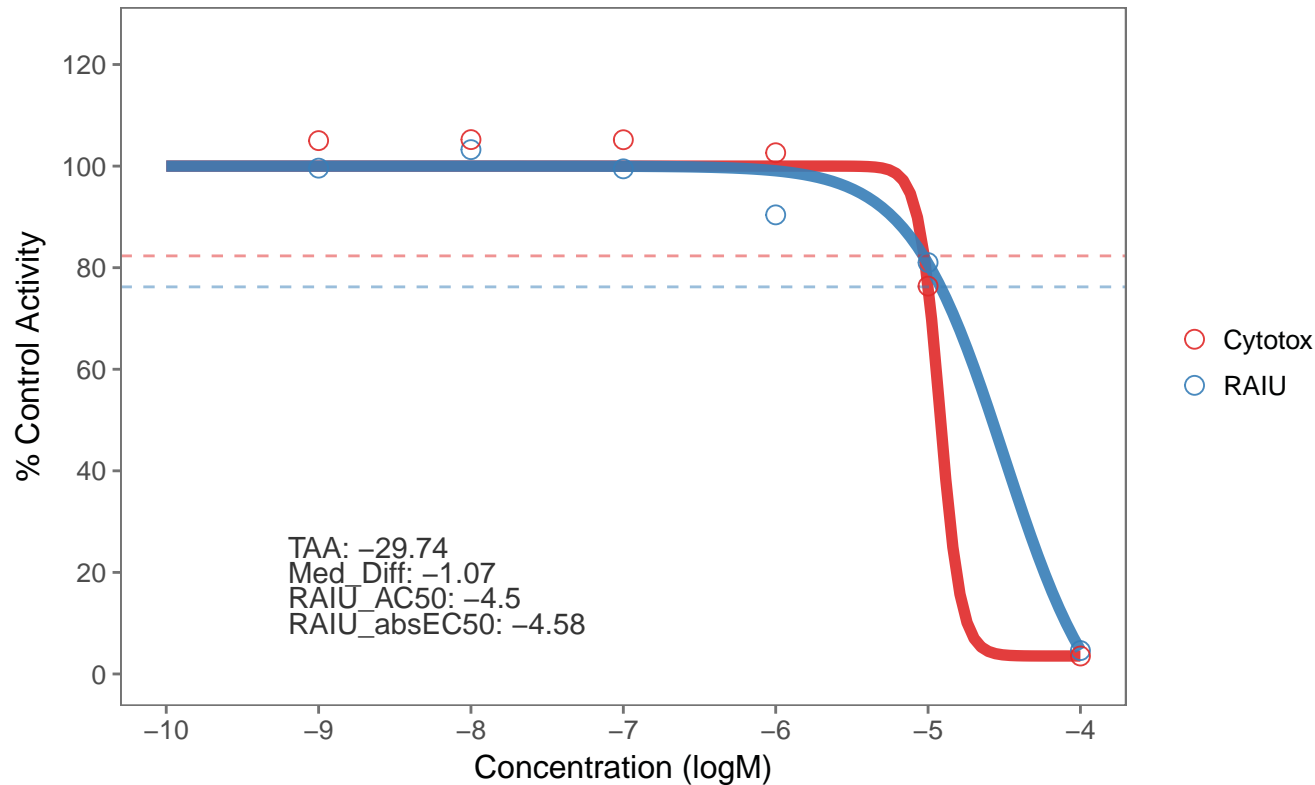



28 . SPID: DCNQ\_Plate\_18\_rep1

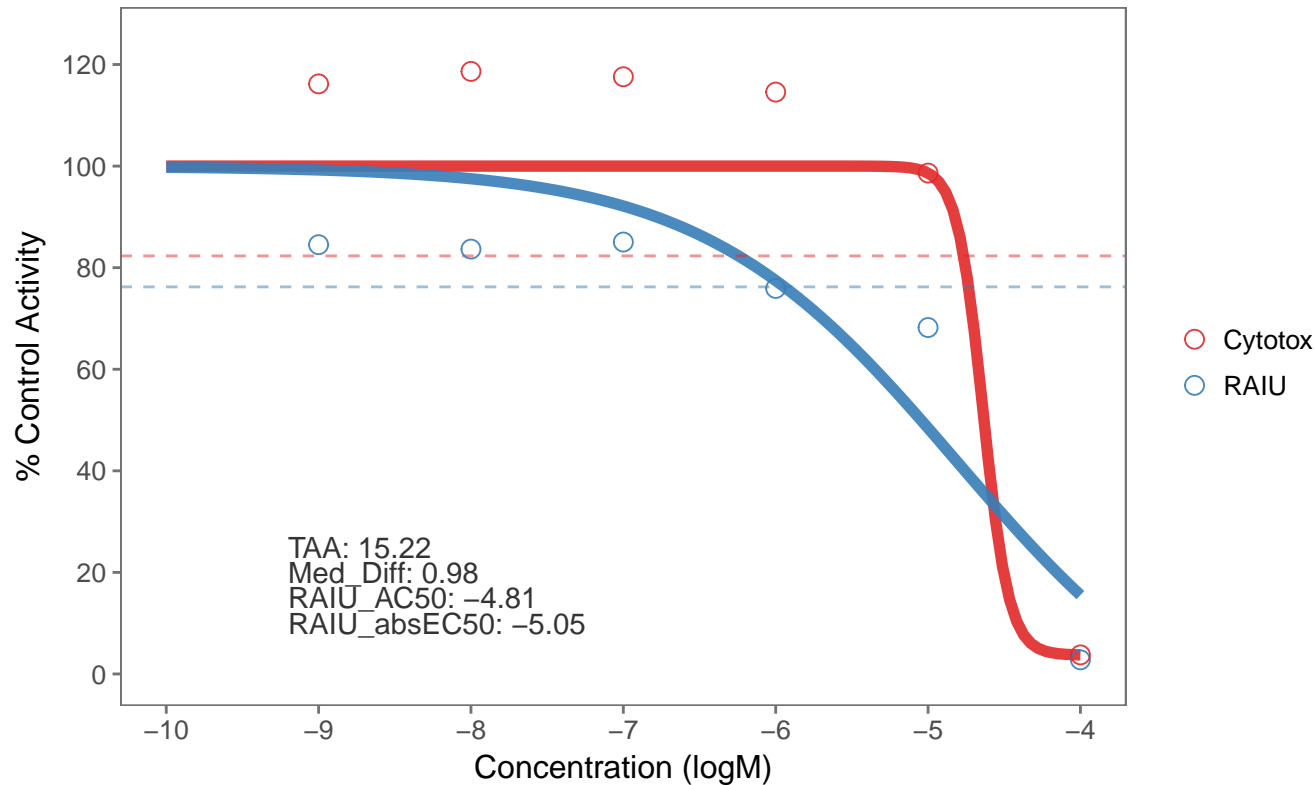

29 . SPID: DCNQ\_Plate\_18\_rep2

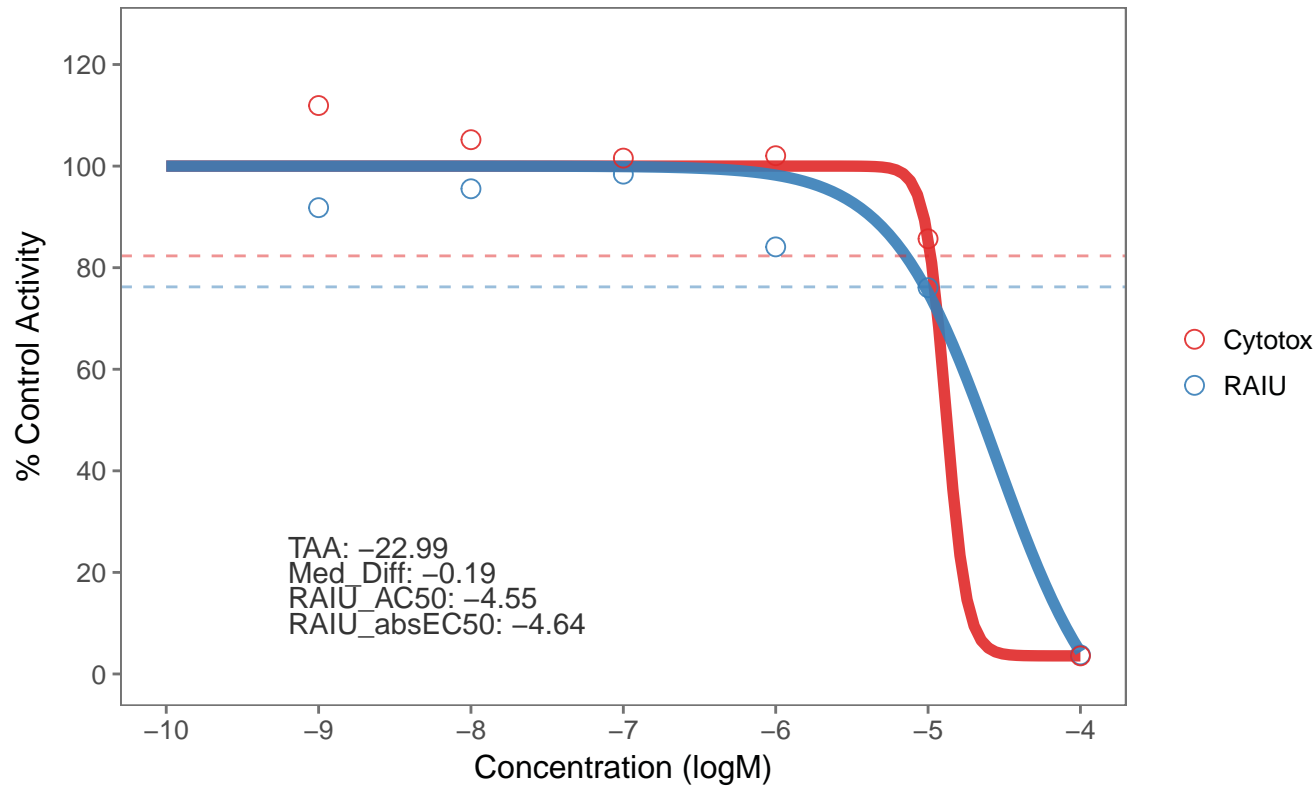

30 . SPID: DCNQ\_Plate\_18\_rep3

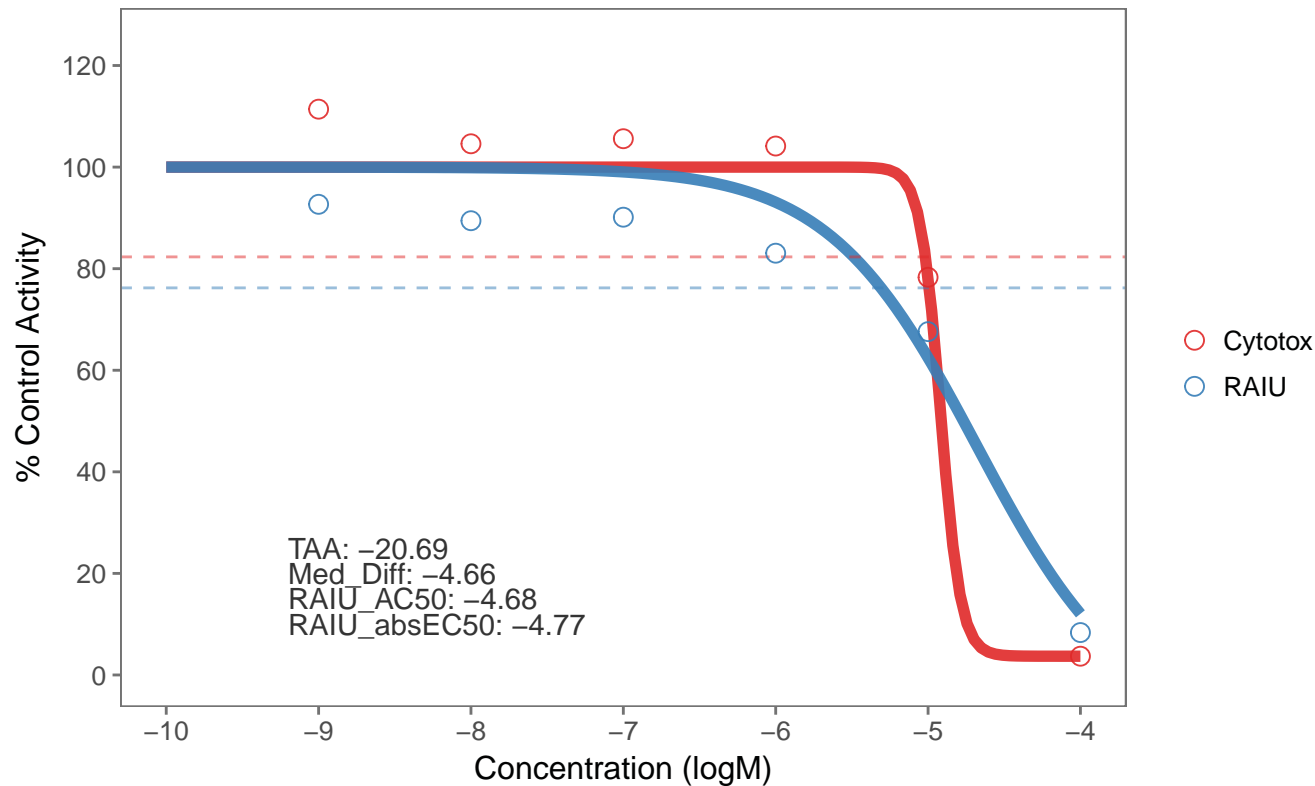

31 . SPID: DCNQ\_Plate\_2\_rep1

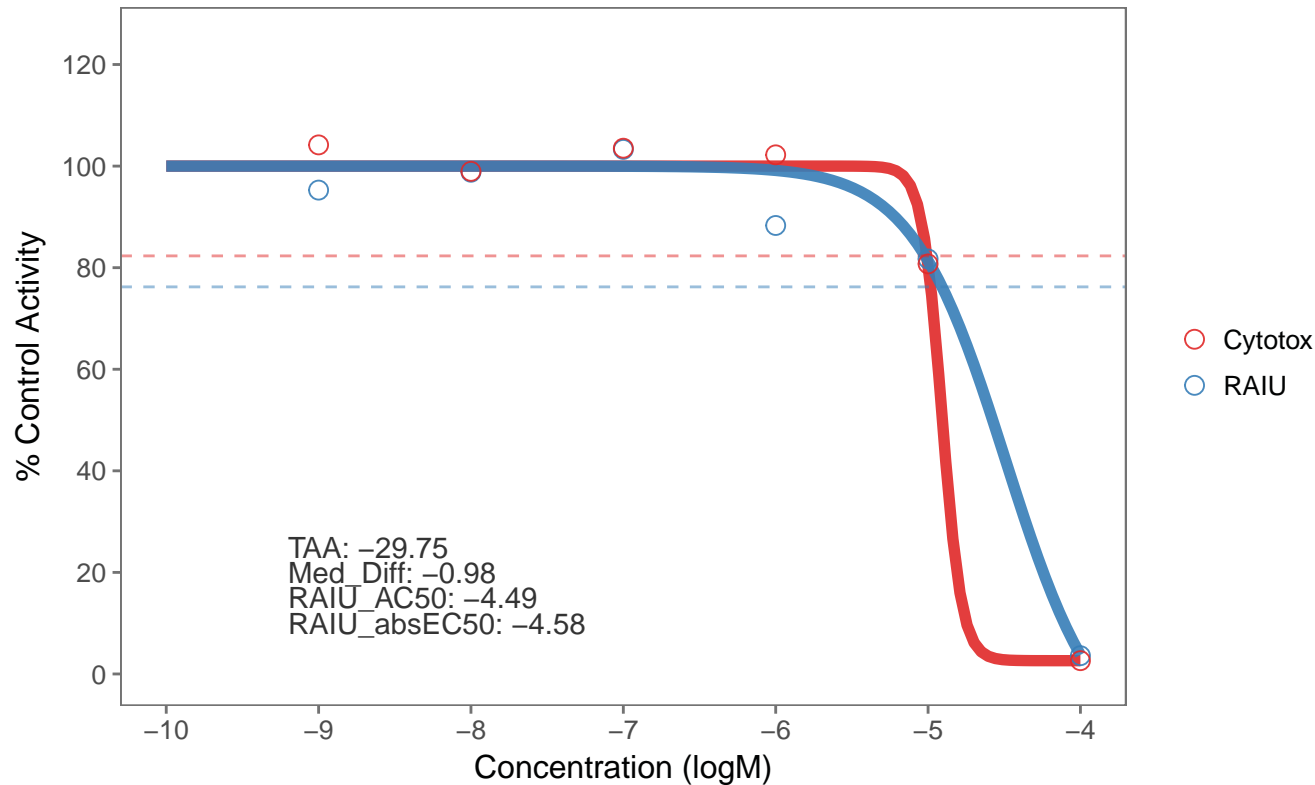

32 . SPID: DCNQ\_Plate\_2\_rep2

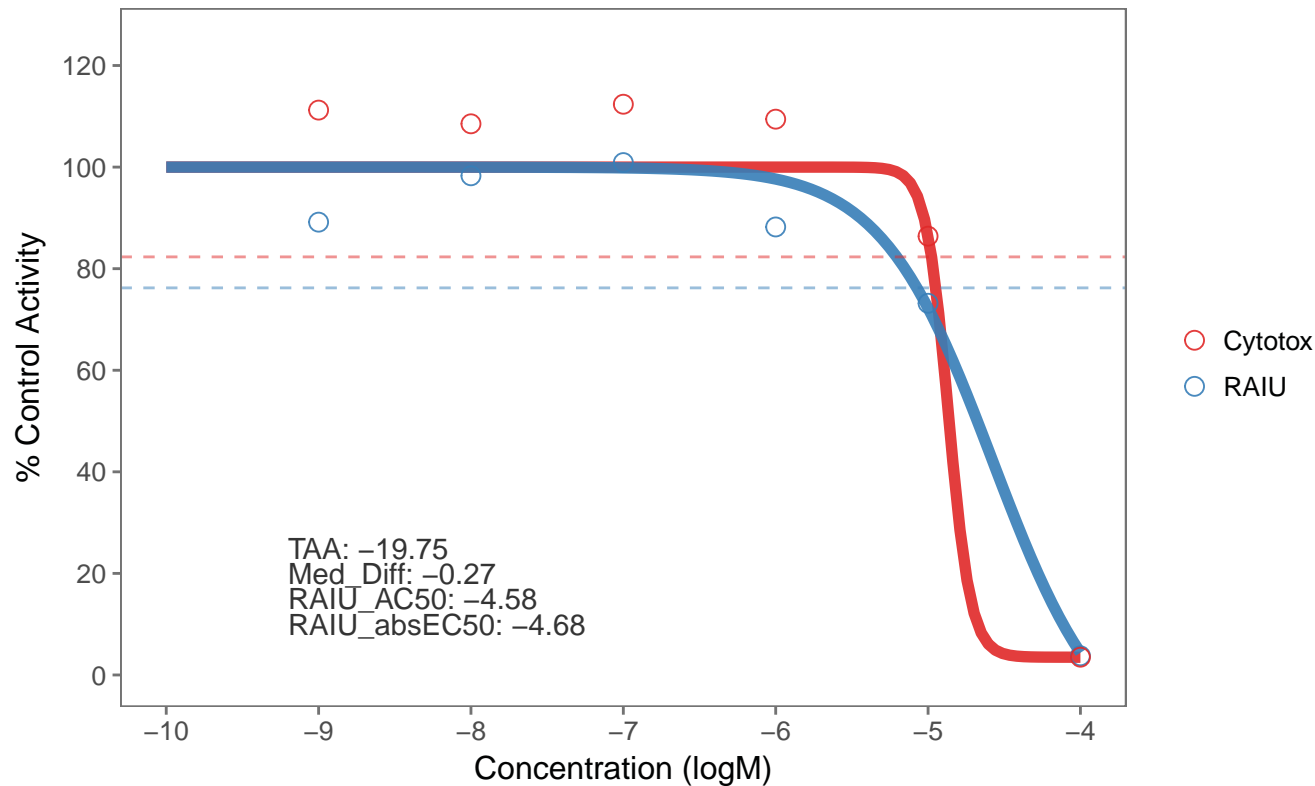

33 . SPID: DCNQ\_Plate\_2\_rep3

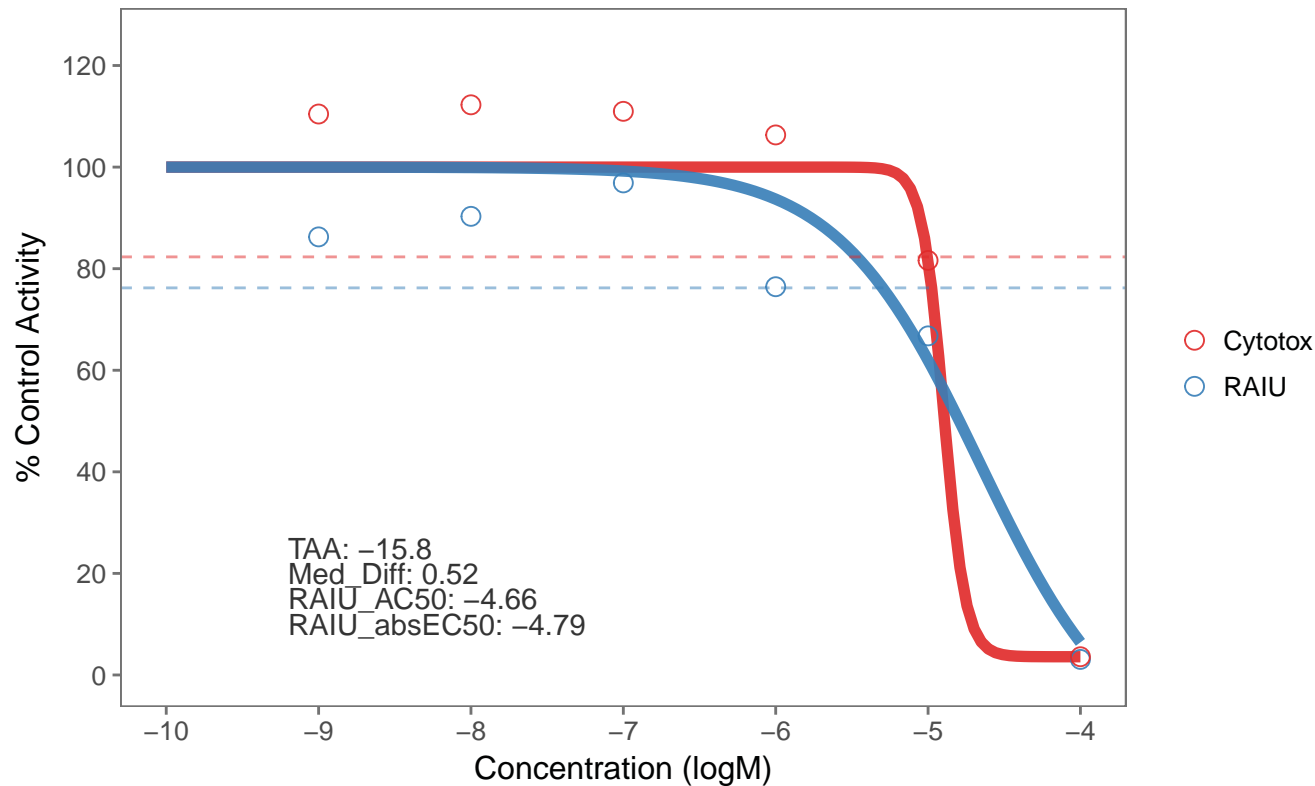

34 . SPID: DCNQ\_Plate\_3\_rep1

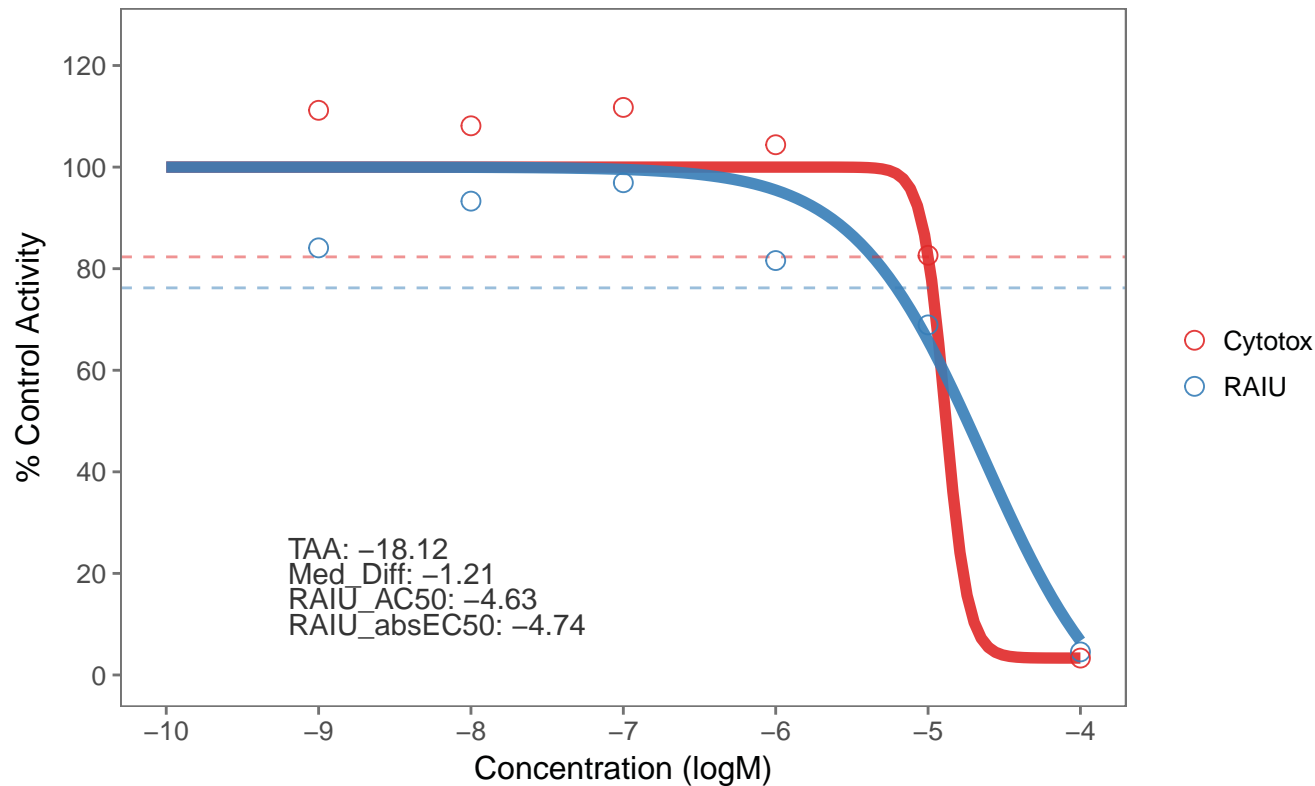

35 . SPID: DCNQ\_Plate\_3\_rep2

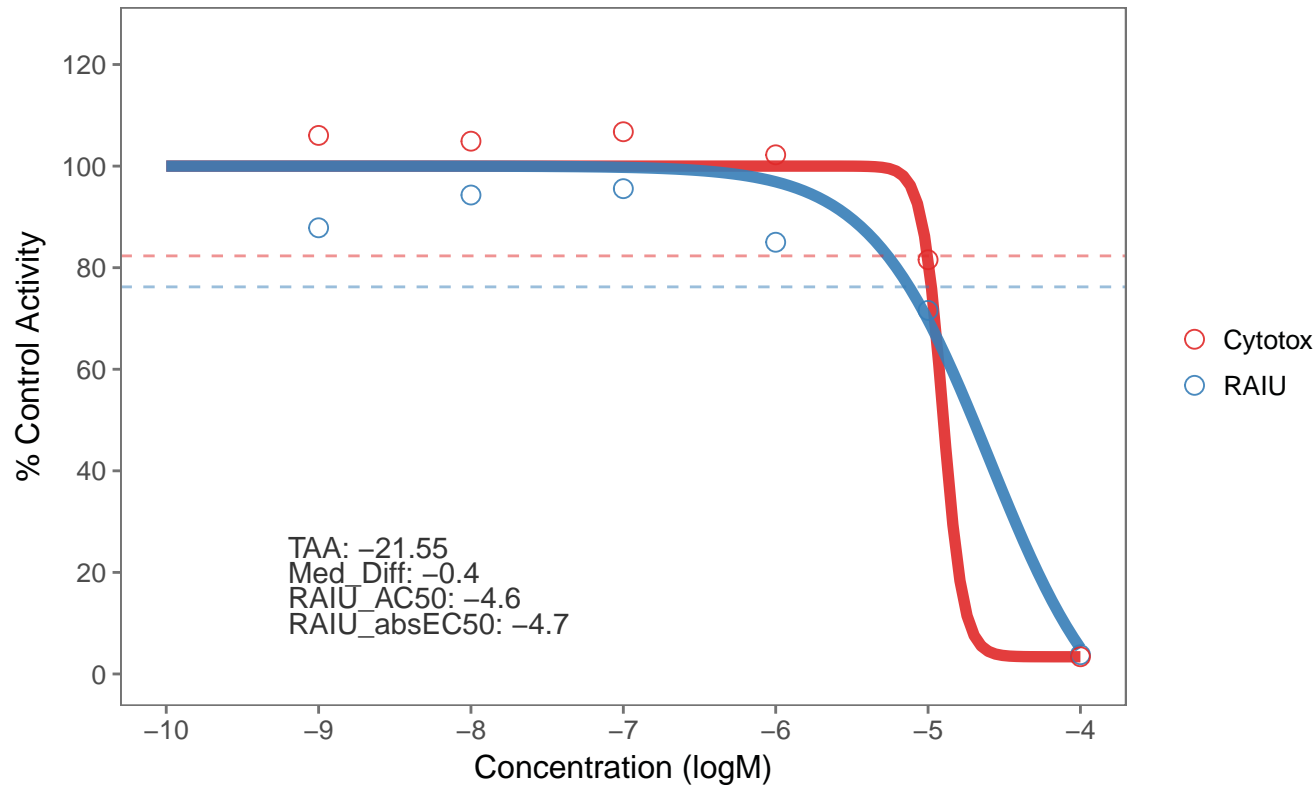



36 . SPID: DCNQ\_Plate\_3\_rep3

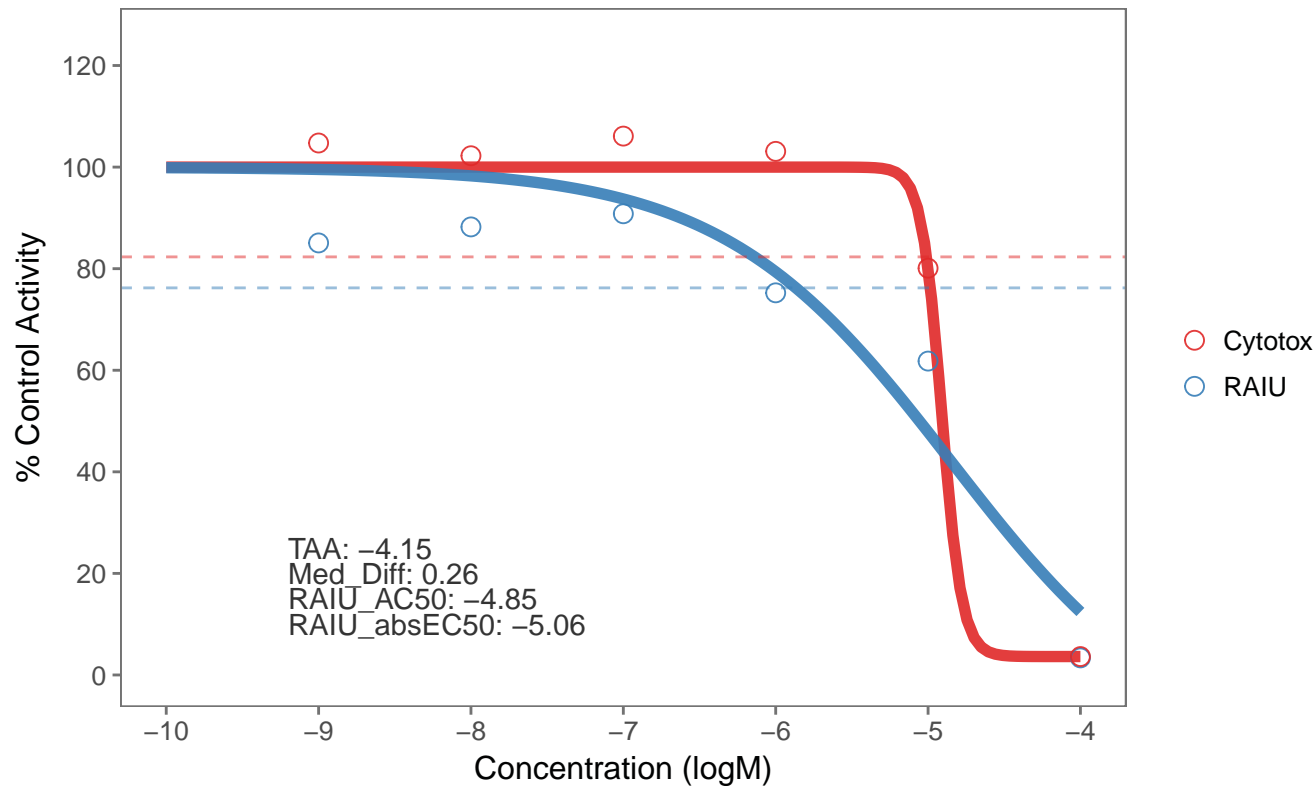

37 . SPID: DCNQ\_Plate\_4\_rep1

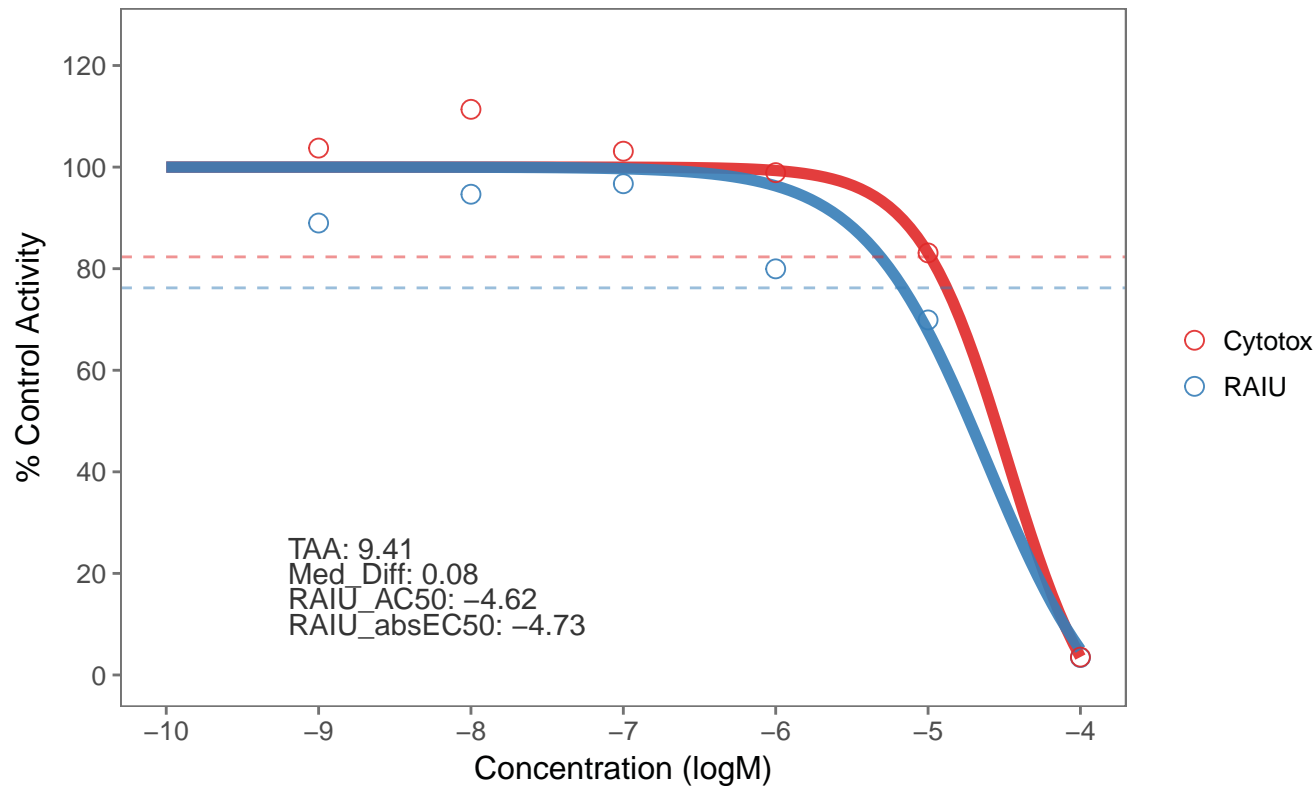

38 . SPID: DCNQ\_Plate\_4\_rep2

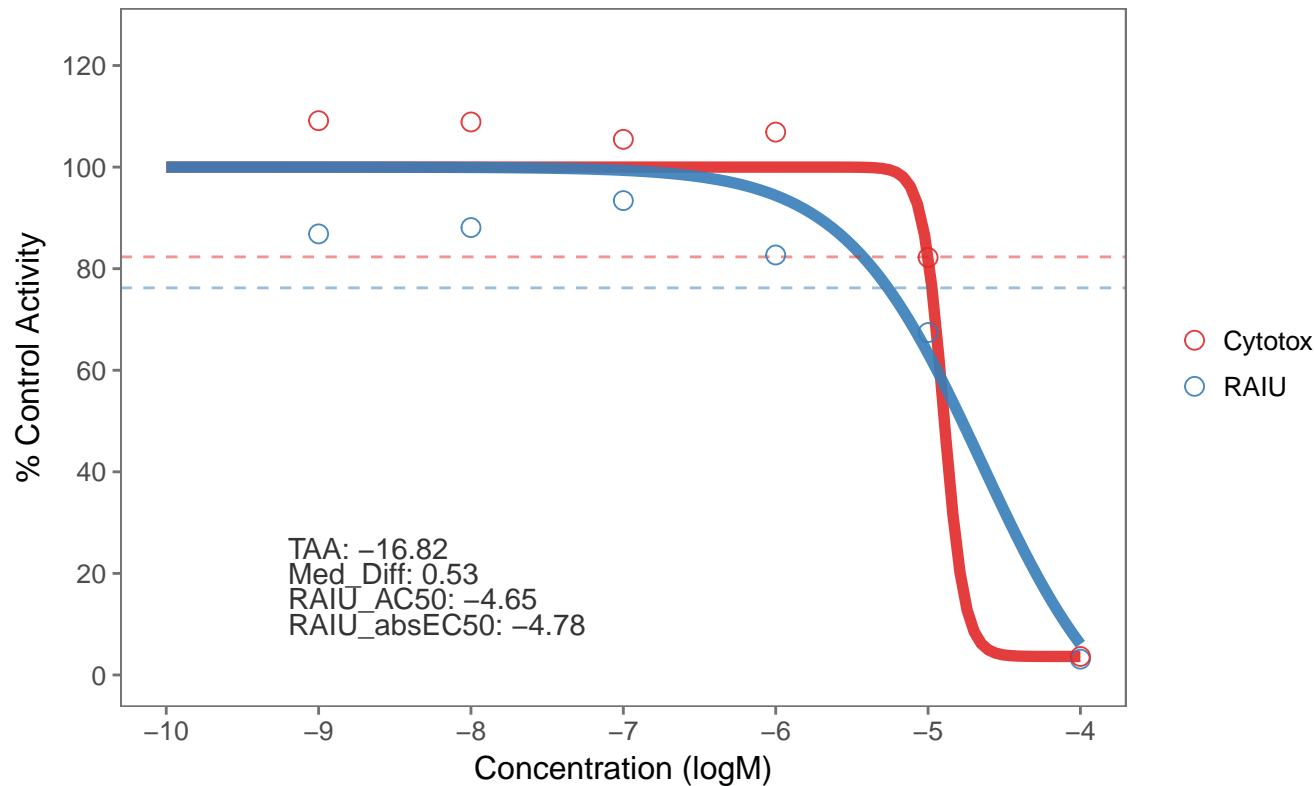

39 . SPID: DCNQ\_Plate\_4\_rep3

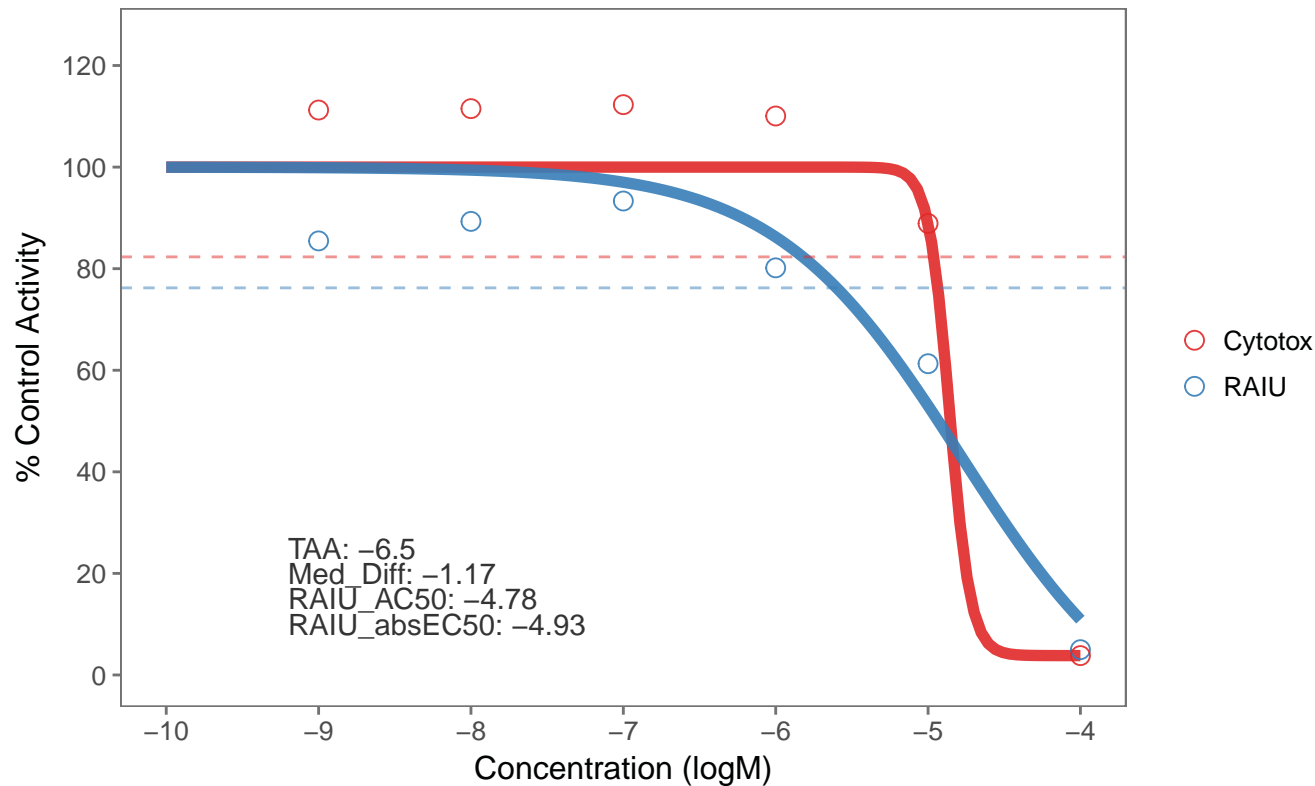

40 . SPID: DCNQ\_Plate\_5\_rep1

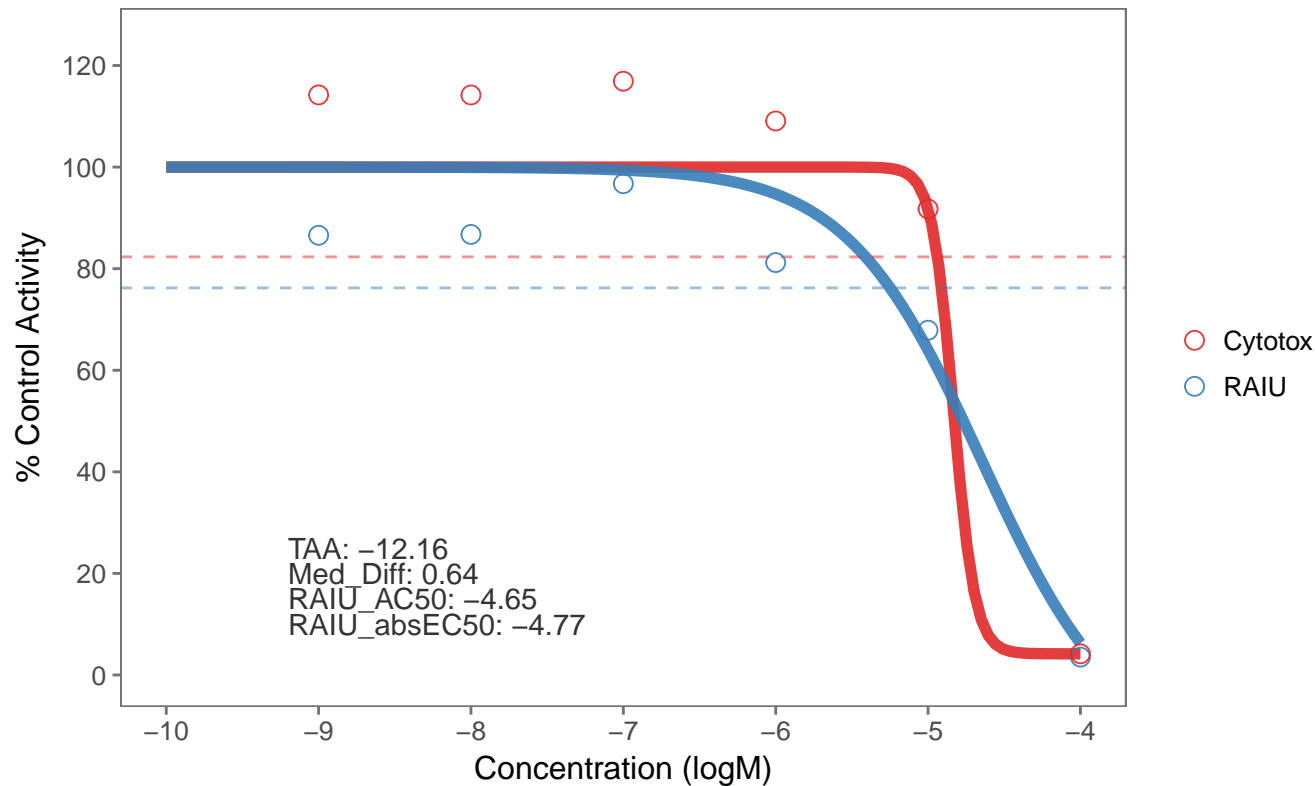

41 . SPID: DCNQ\_Plate\_5\_rep2

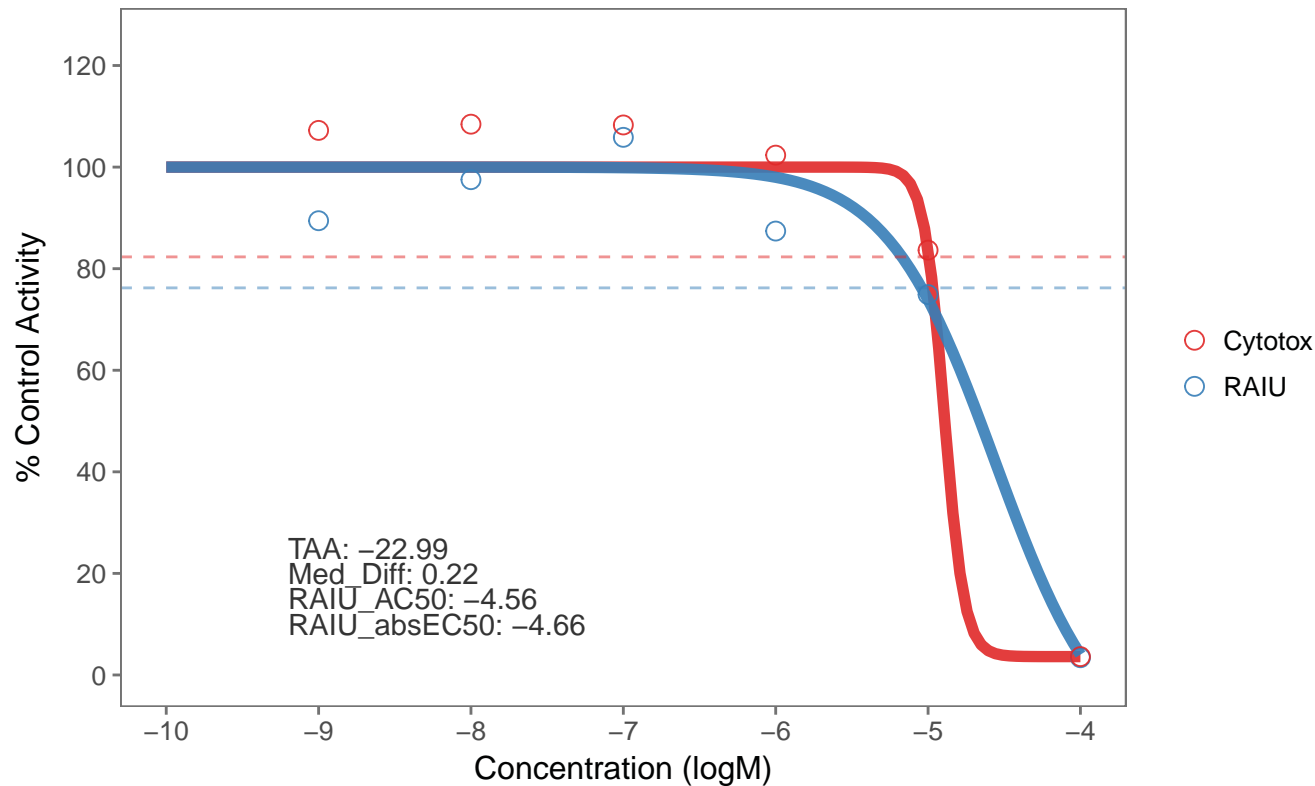

42 . SPID: DCNQ\_Plate\_5\_rep3

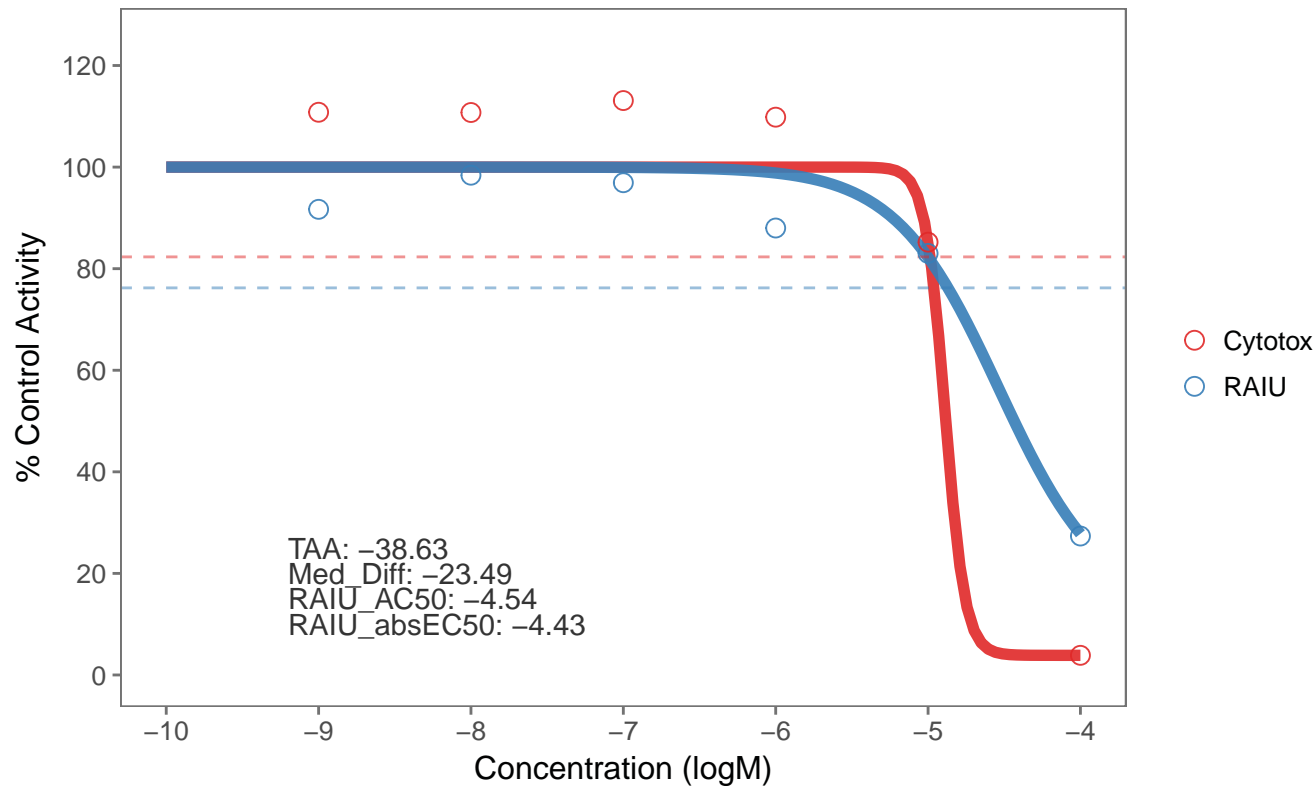

43 . SPID: DCNQ\_Plate\_6\_rep1

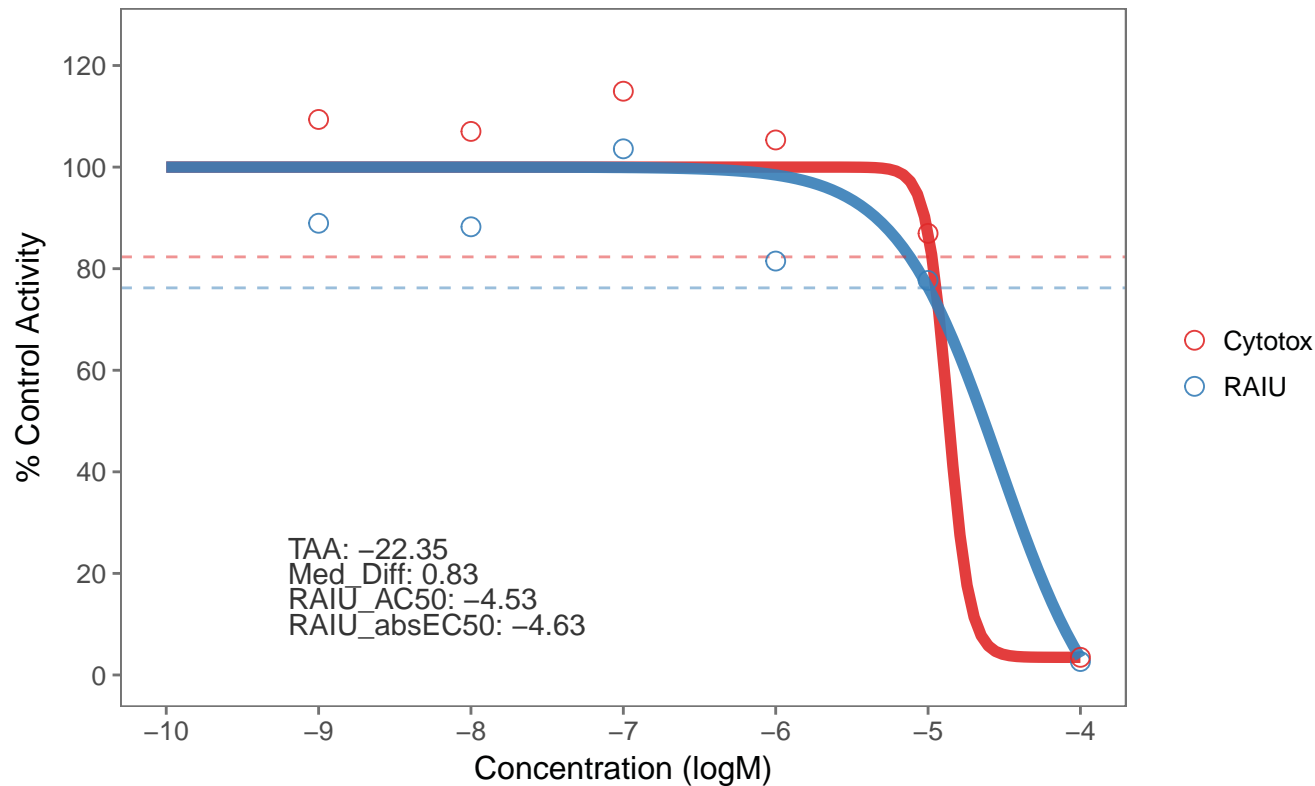



44 . SPID: DCNQ\_Plate\_6\_rep2

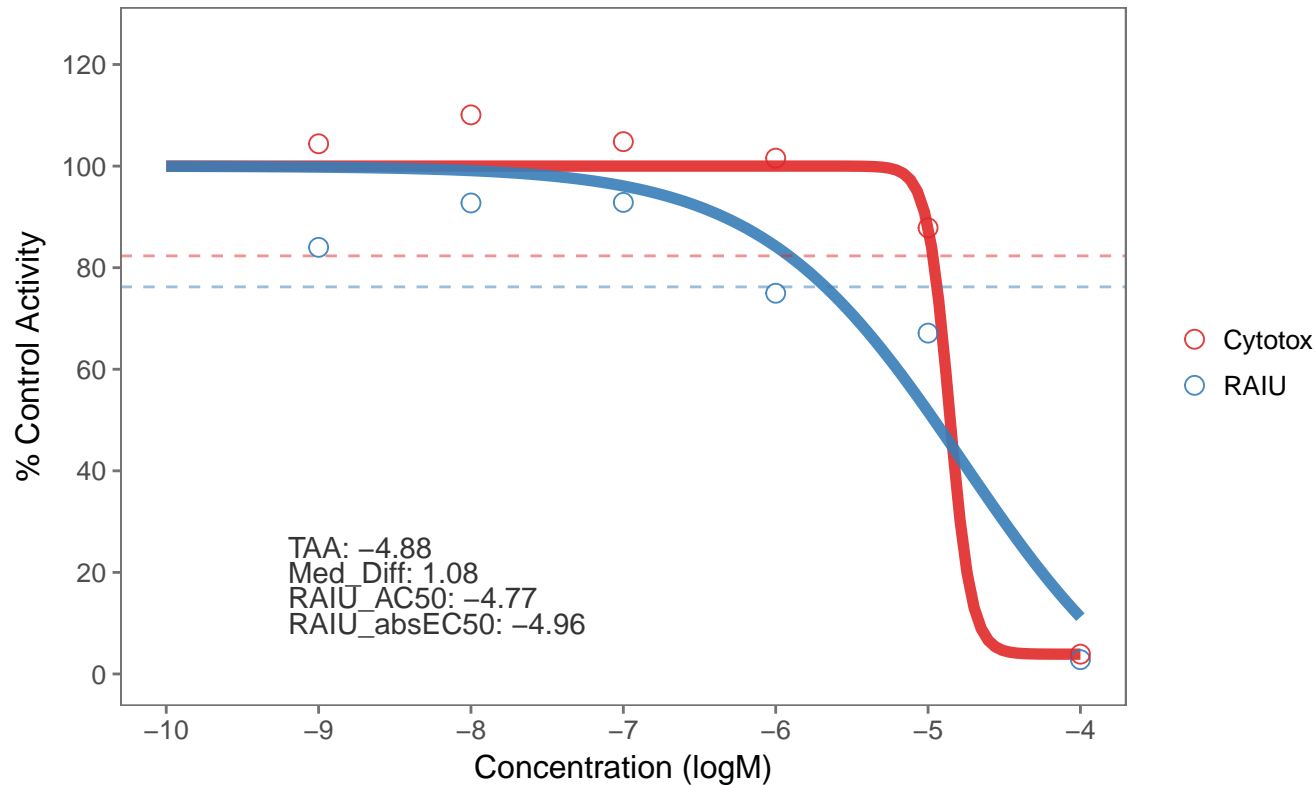

45 . SPID: DCNQ\_Plate\_6\_rep3

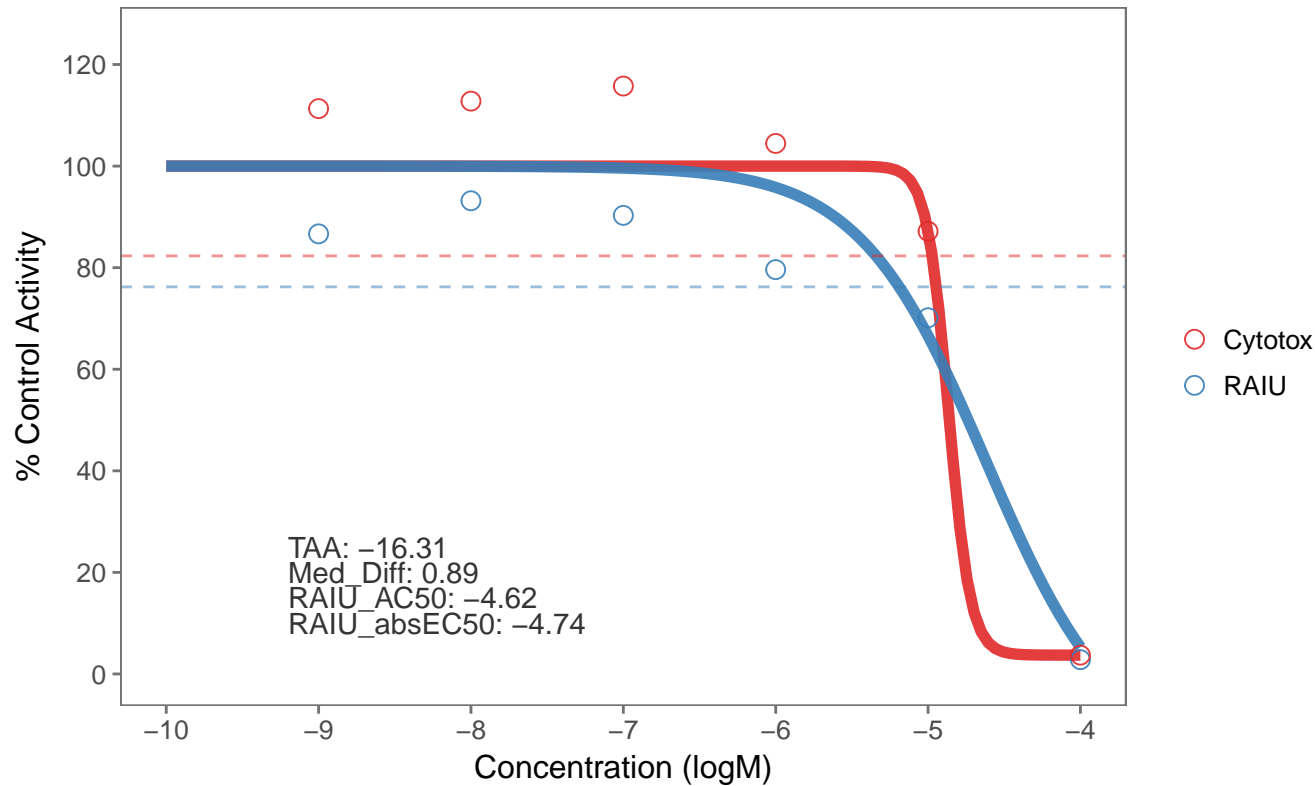

46 . SPID: DCNQ\_Plate\_7\_rep1

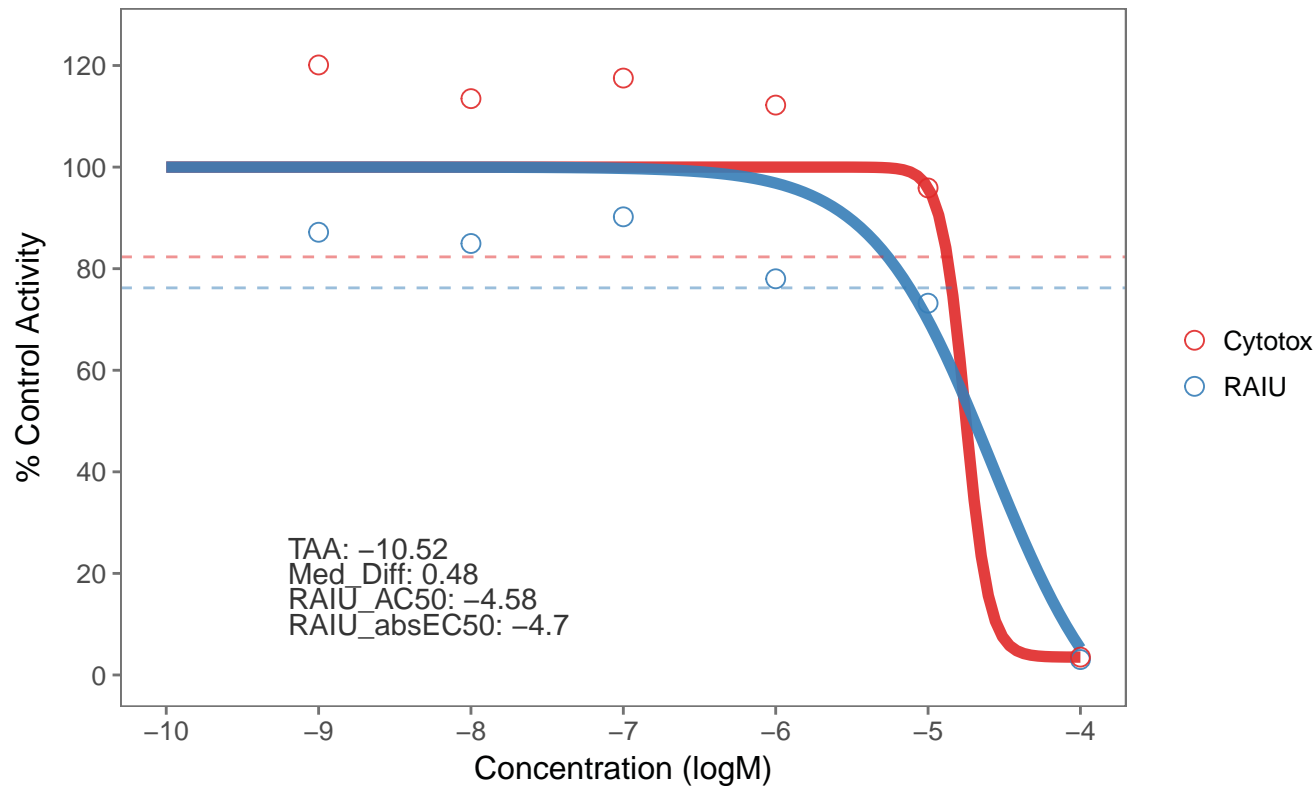

47 . SPID: DCNQ\_Plate\_7\_rep2

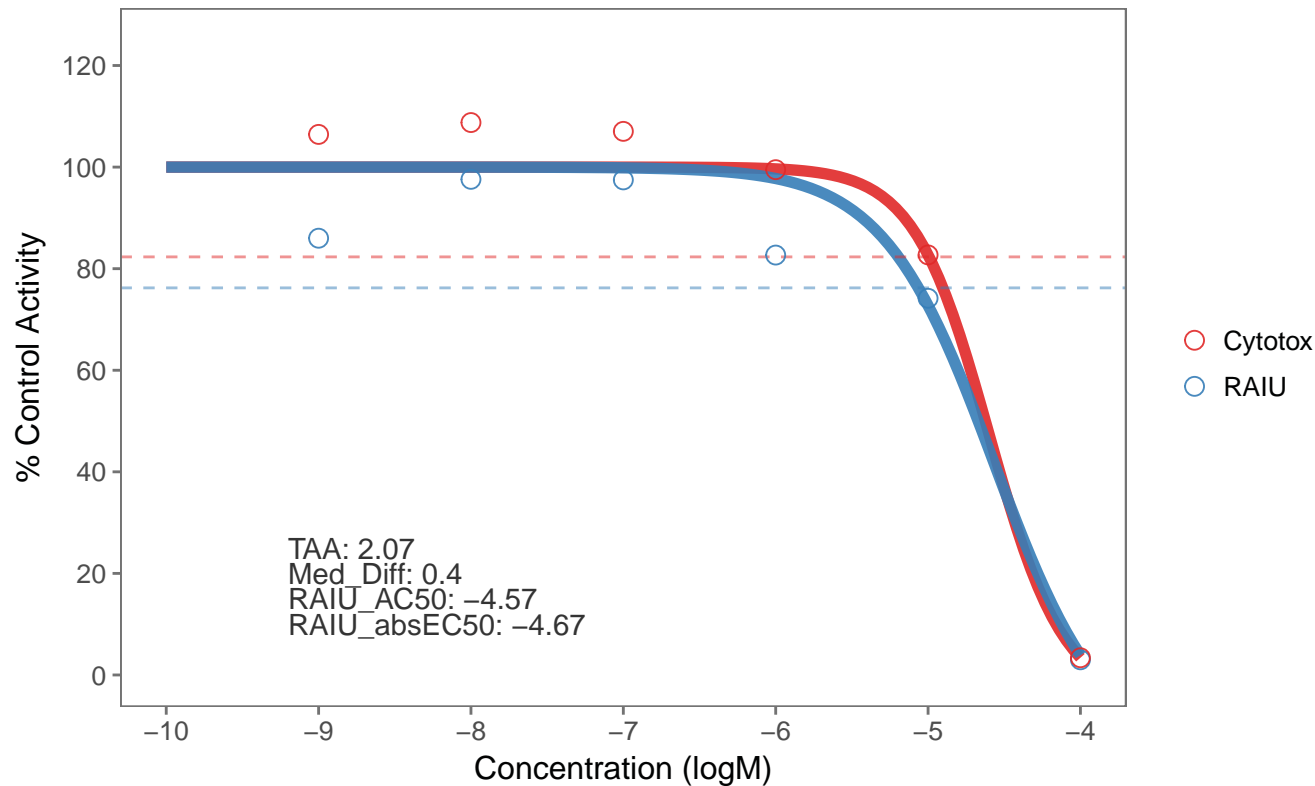

48 . SPID: DCNQ\_Plate\_7\_rep3

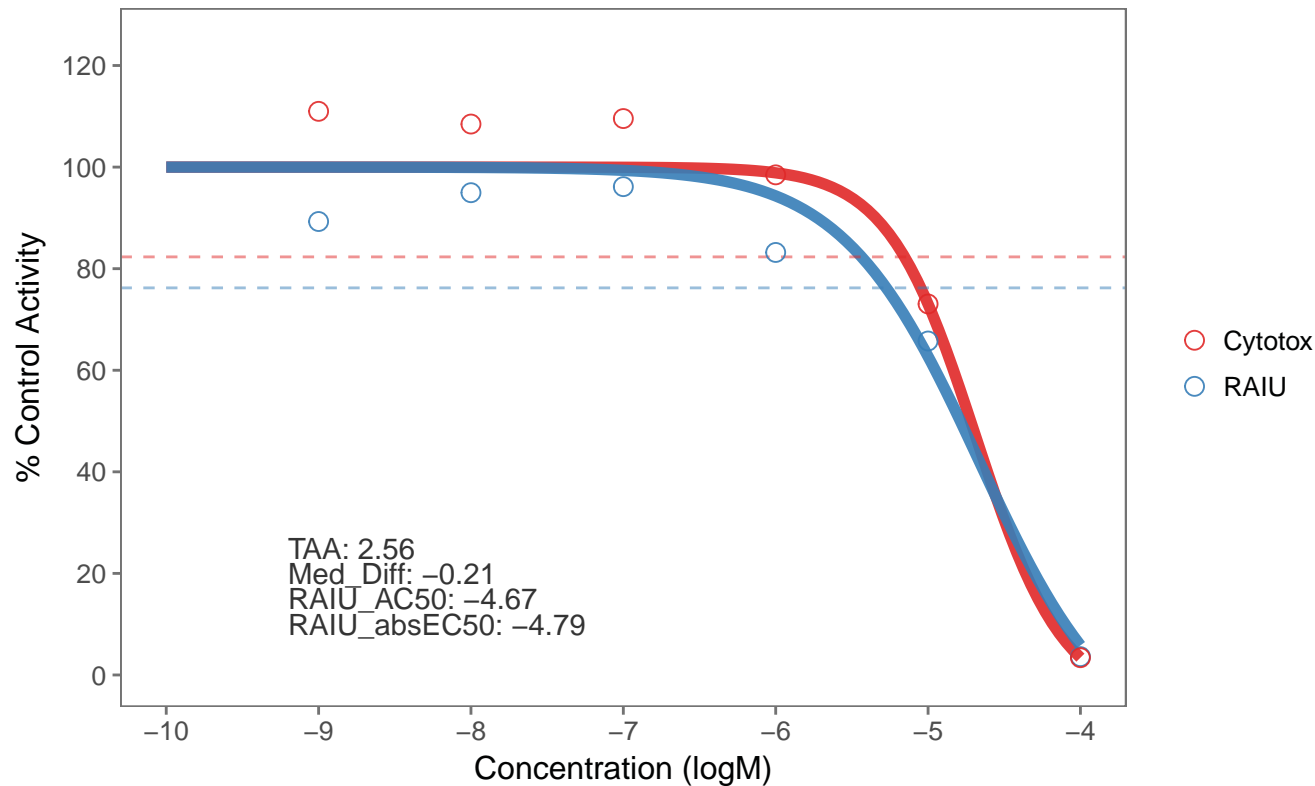

49 . SPID: DCNQ\_Plate\_8\_rep1

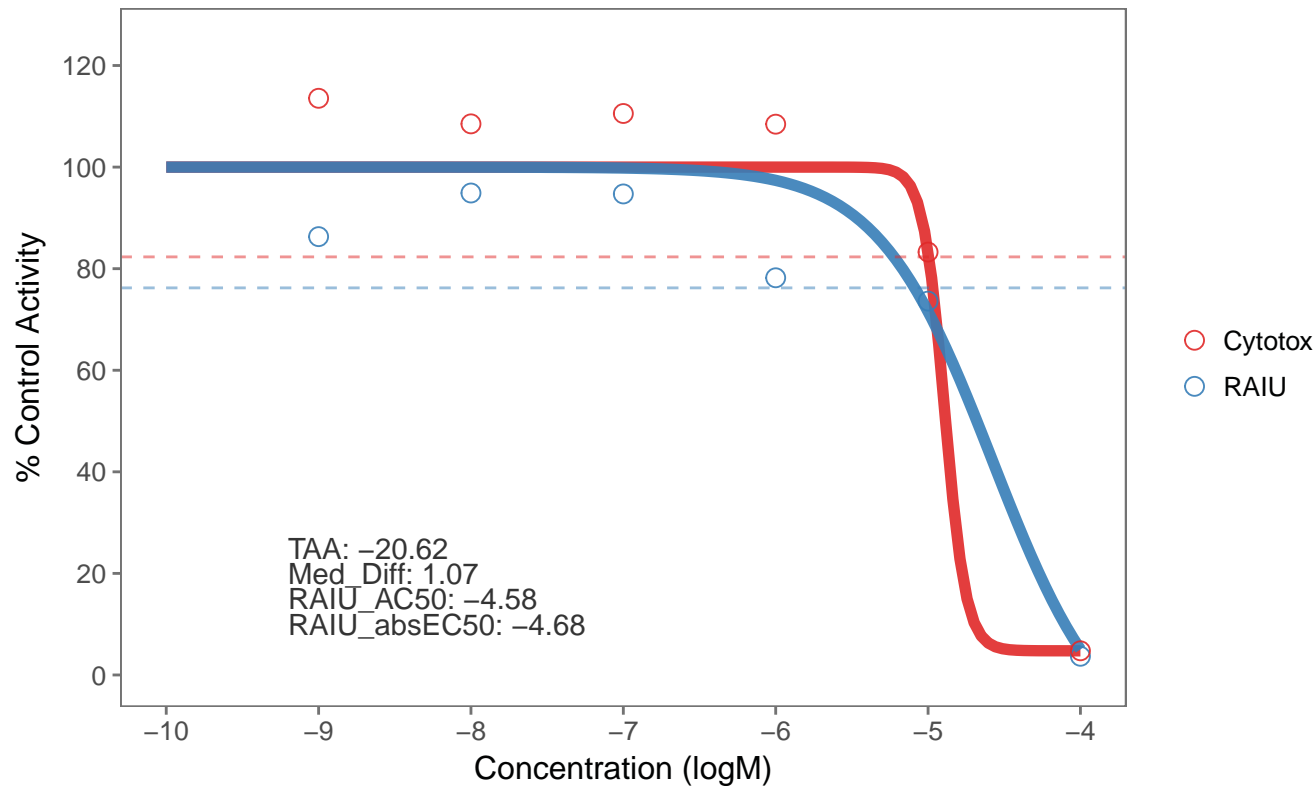

50 . SPID: DCNQ\_Plate\_8\_rep2

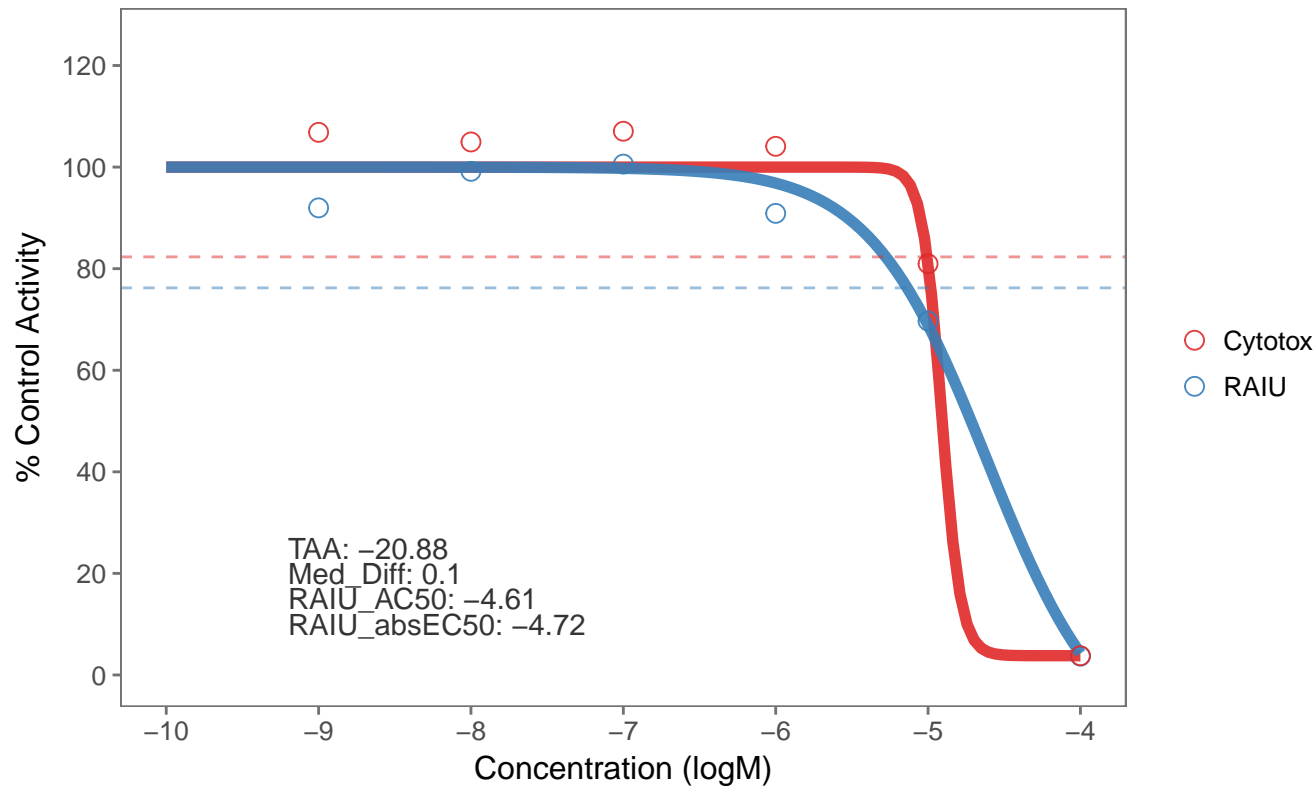

51 . SPID: DCNQ\_Plate\_8\_rep3

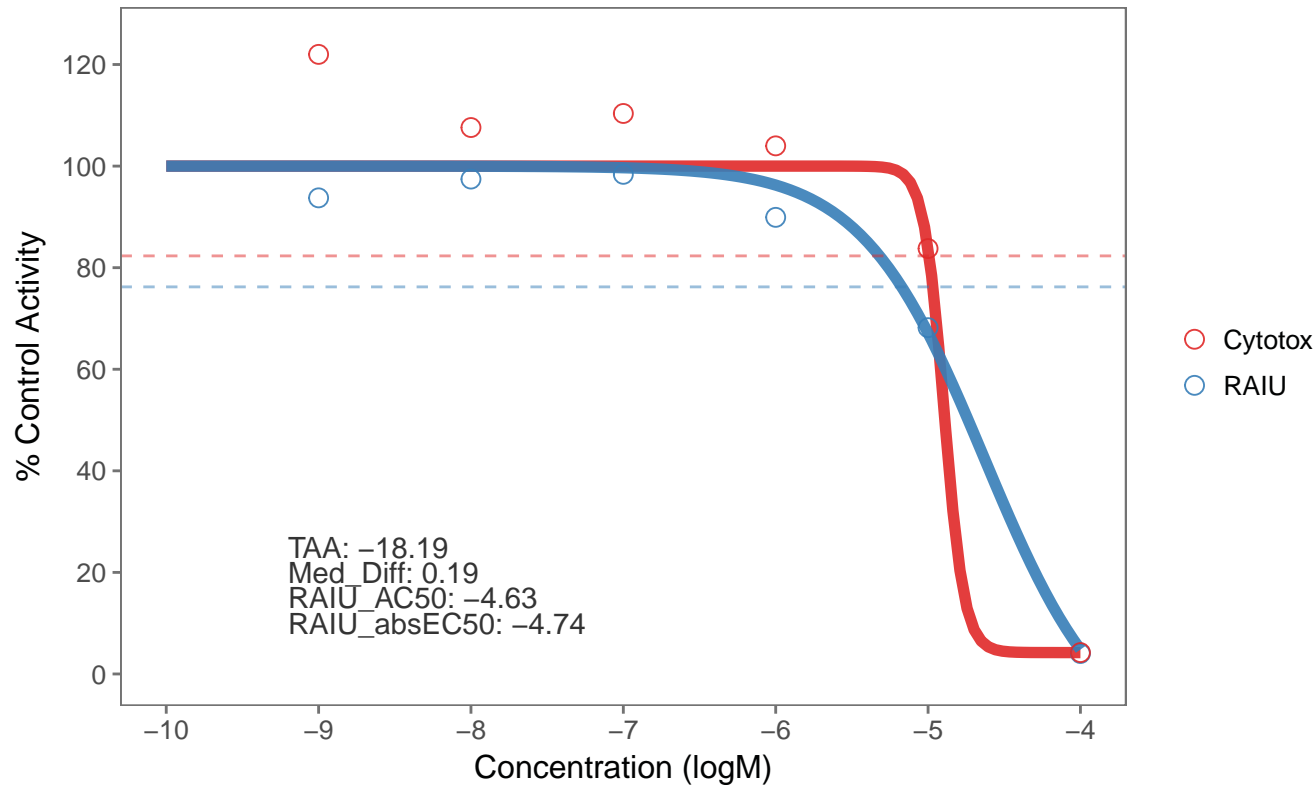



52 . SPID: DCNQ\_Plate\_9\_rep1

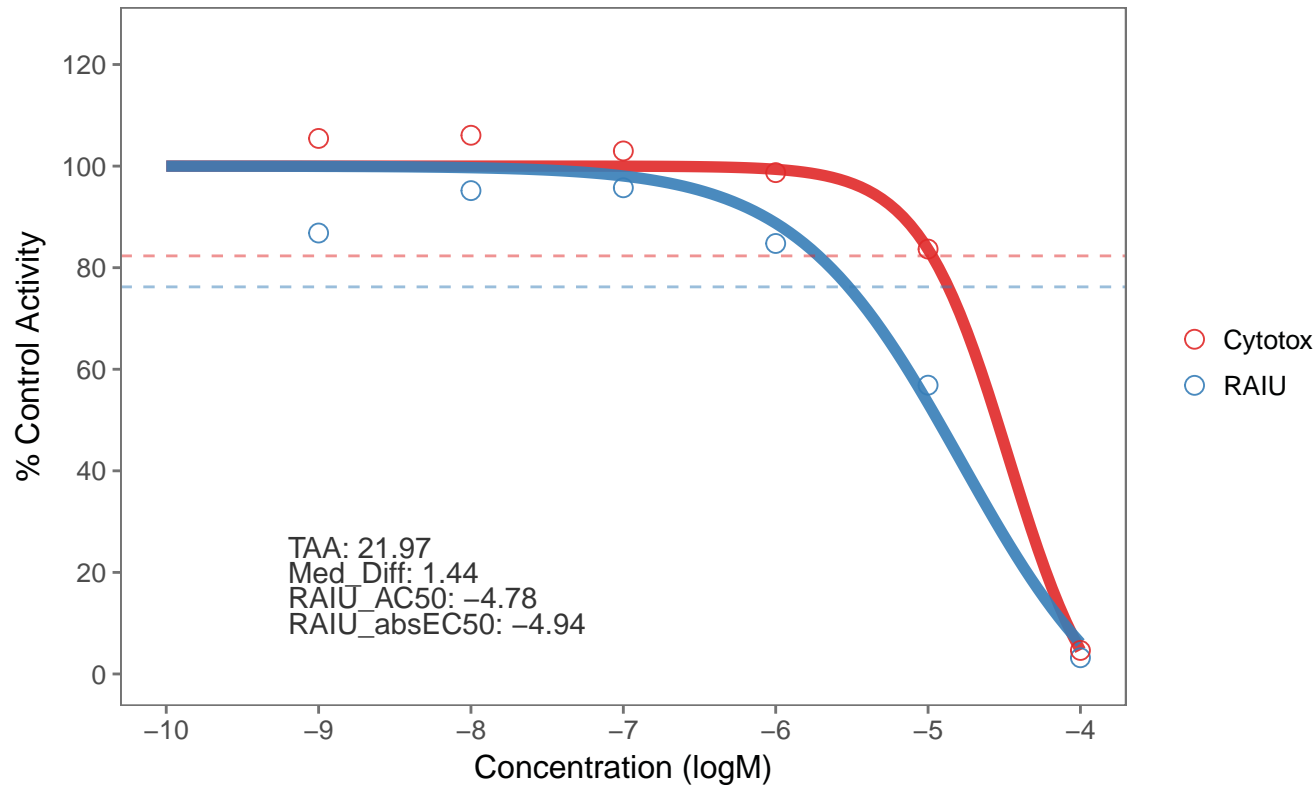

53 . SPID: DCNQ\_Plate\_9\_rep2

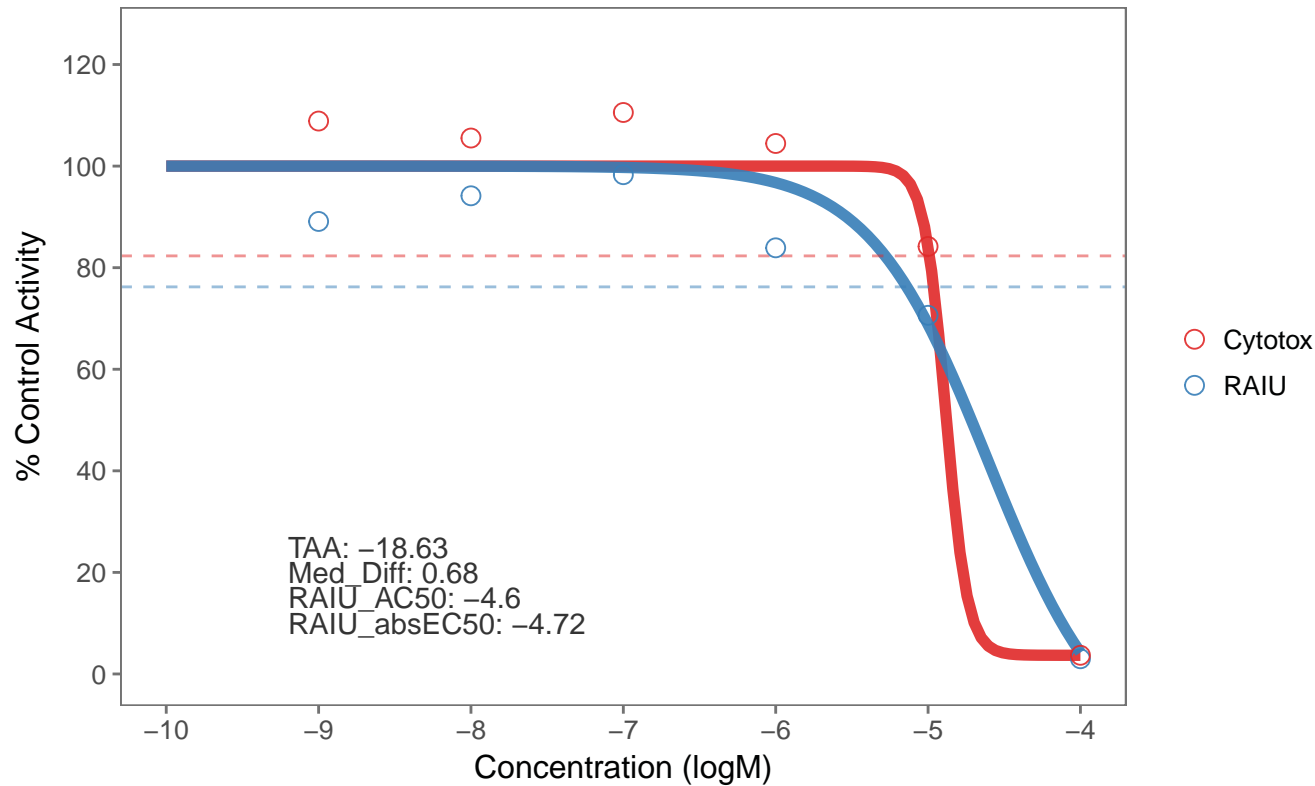

54 . SPID: DCNQ\_Plate\_9\_rep3

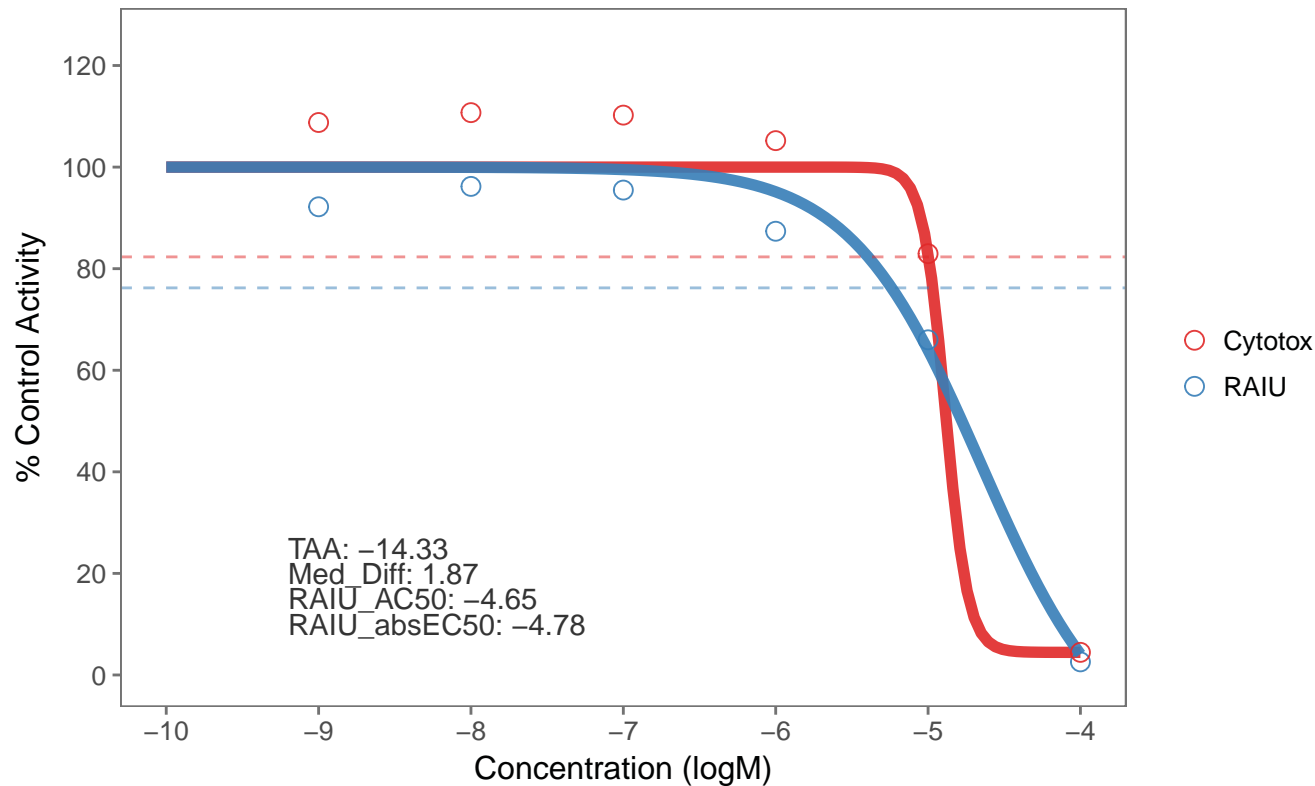

**Part V. Dose-response of reanalyzed reference chemicals**

### KPF6

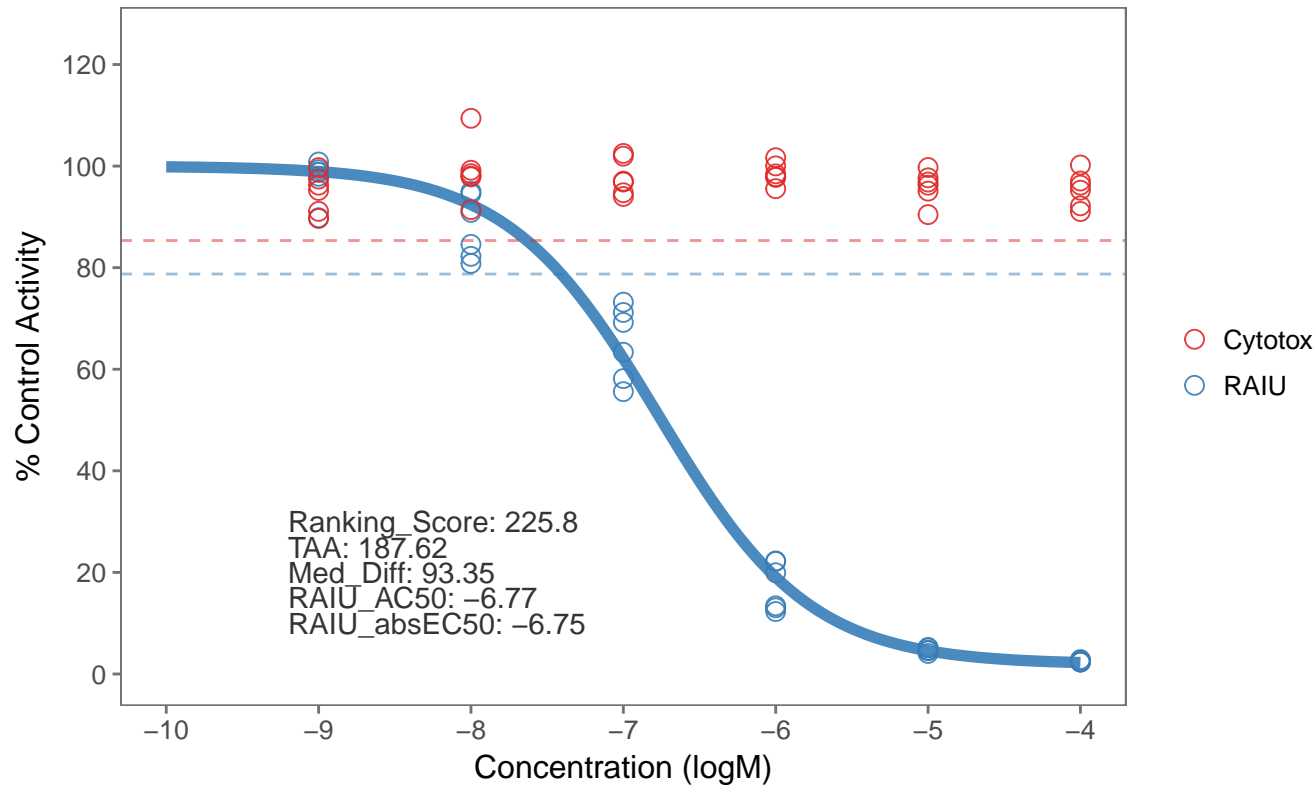

### KClO4

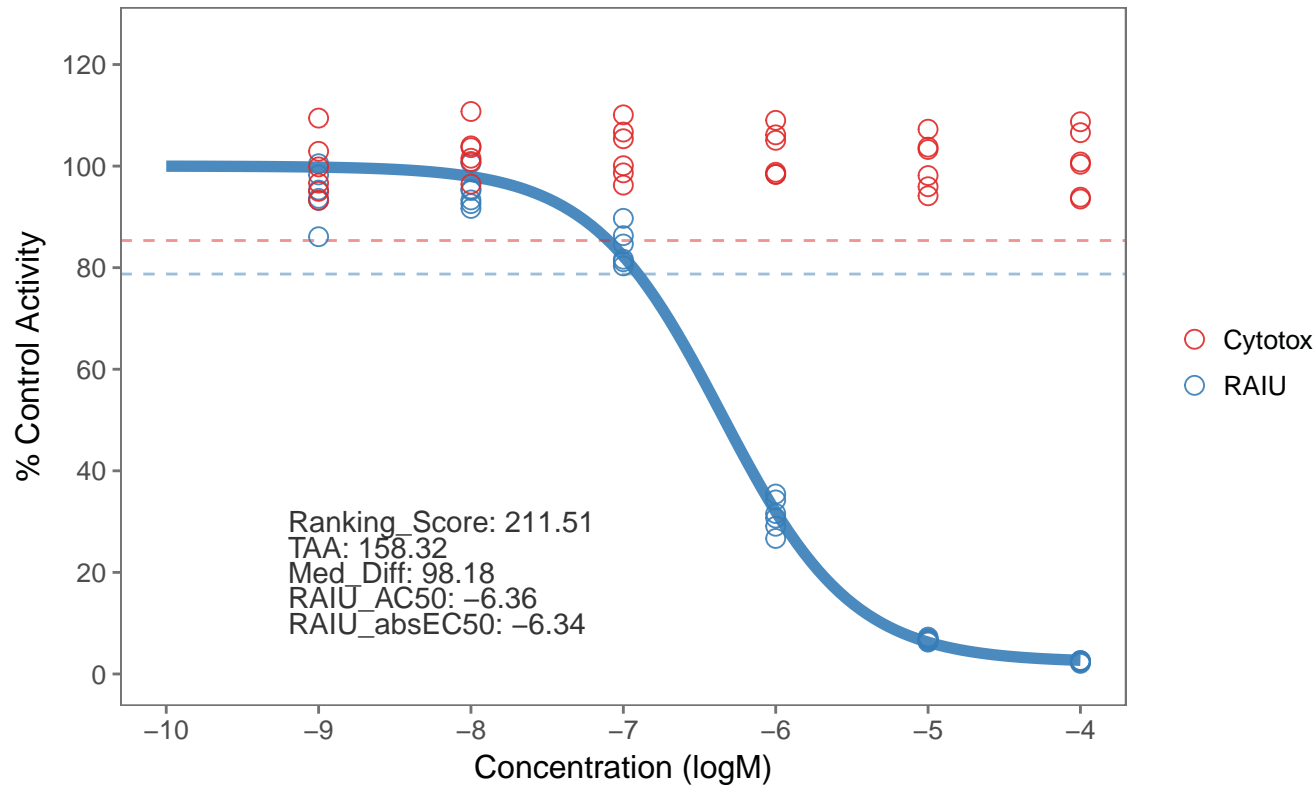

### NaBF<sub>4</sub>

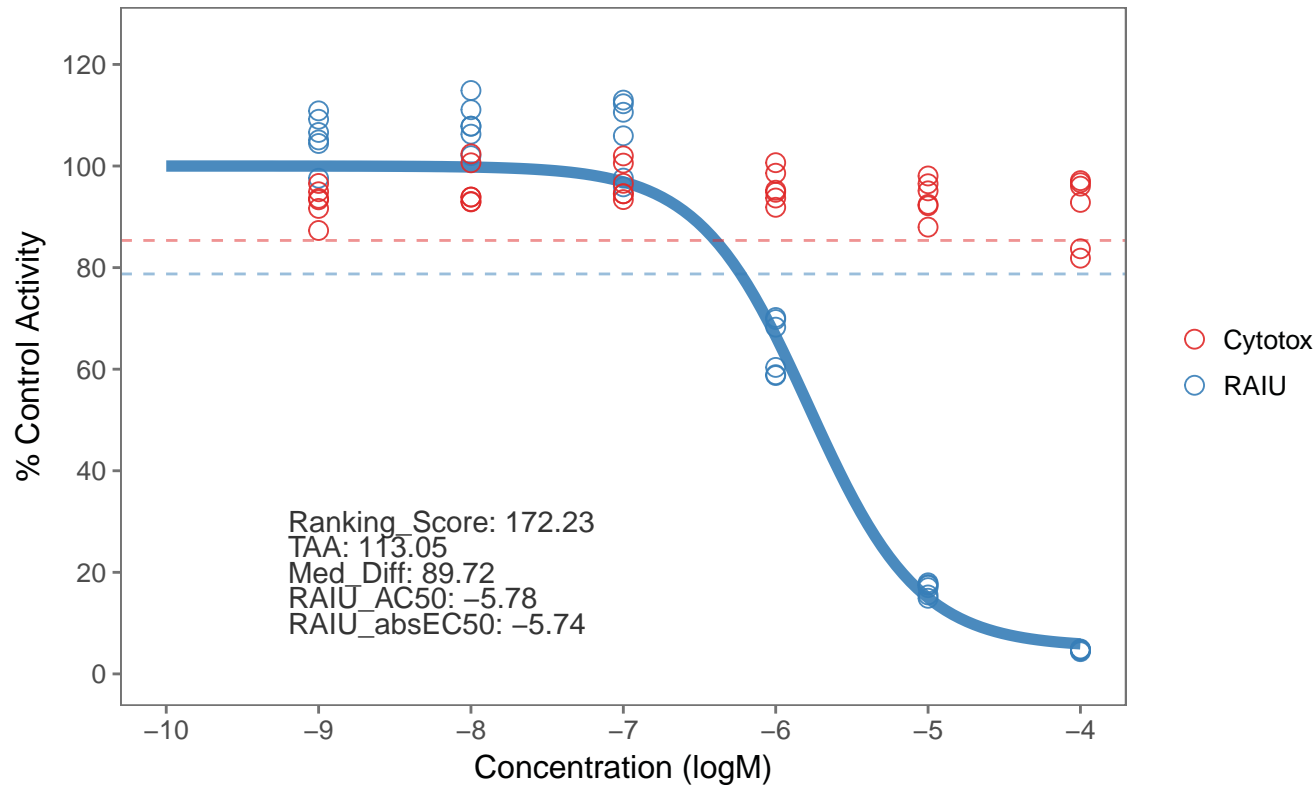

### NaSCN

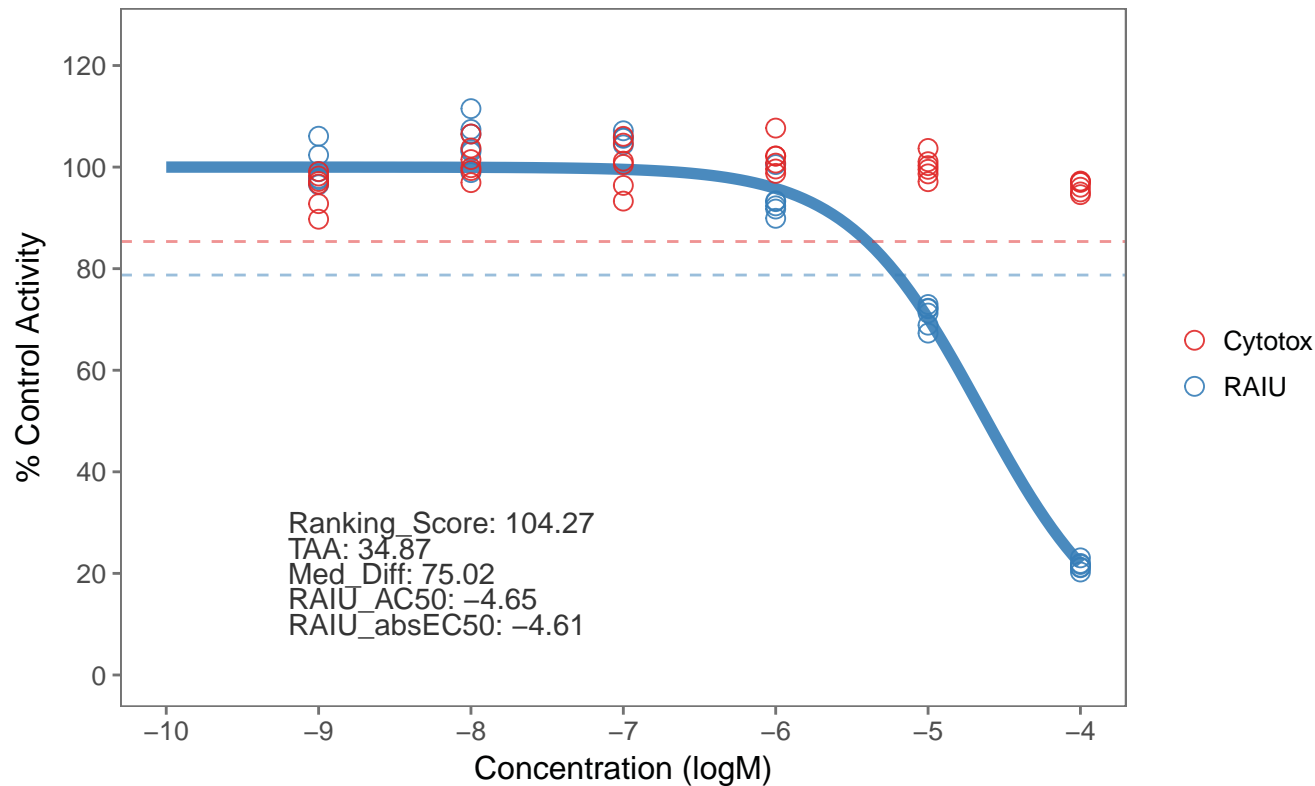



## **Part VI. Documented data analysis in R markdown**

# Part VI. Documented Data Analysis in R

## Introduction

This report includes all the R code in the analysis of ToxCast Phase 1\_v2 chemical library screening results from the NIS radioactive iodide uptake (RAIU) assay. With the aim of reproducible data analysis, this document was written in rmarkdown format and generated by R's `knitr` and `bookdown` package.

A web book version of this document (easier to navigate), in addition with interactive dose-response plots is also available [at this link:https://njekin.github.io/NIS-RAIU-assay-ToxCast-Phase1\\_v2-screening-analysis/index.html](https://njekin.github.io/NIS-RAIU-assay-ToxCast-Phase1_v2-screening-analysis/index.html).

Key R functions written in this analysis were compiled as an R package `toxplot`, and version 0.1.0 is available on [CRAN](#). To get the most up-to-date source code please go to [github](#). At the **end of this document** the source code of these functions used in this analysis is also provided.

## Single-Conc Analysis

```
rm(list=ls())
library(plotly)
library(ggthemes)
library(RColorBrewer)
library(stringr)
library(readxl)
library(grid)
library(gridExtra)
library(devtools)
load_all("../..../toxplot")
library(tidyverse)
session_info()
```

```
## setting value
## version R version 3.3.0 (2016-05-03)
## system x86_64, mingw32
## ui RTerm
## language (EN)
## collate English_United States.1252
## tz America/New_York
## date 2018-03-29
##
## package * version date source
## assertthat 0.1 2013-12-06 CRAN (R 3.3.0)
## backports 1.1.2 2017-12-13 CRAN (R 3.3.3)
## base64enc 0.1-3 2015-07-28 CRAN (R 3.3.0)
## chron 2.3-47 2015-06-24 CRAN (R 3.3.1)
## colorspace 1.2-6 2015-03-11 CRAN (R 3.3.0)
## data.table 1.9.6 2015-09-19 CRAN (R 3.3.1)
## DBI 0.5-1 2016-09-10 CRAN (R 3.3.1)
## devtools * 1.12.0 2016-06-24 CRAN (R 3.3.1)
## digest 0.6.10 2016-08-02 CRAN (R 3.3.1)
## dplyr * 0.5.0 2016-06-24 CRAN (R 3.3.1)
```

```

## evaluate      0.9      2016-04-29 CRAN (R 3.3.1)
## formatR      1.4      2016-05-09 CRAN (R 3.3.1)
## ggplot2      * 2.2.1   2016-12-30 CRAN (R 3.3.3)
## ggthemes     * 3.2.0   2016-07-11 CRAN (R 3.3.1)
## gridExtra    * 2.2.1   2016-02-29 CRAN (R 3.3.0)
## gtable       0.2.0   2016-02-26 CRAN (R 3.3.0)
## htmltools    0.3.5   2016-03-21 CRAN (R 3.3.0)
## htmlwidgets  0.7      2016-08-02 CRAN (R 3.3.1)
## httr         1.2.1   2016-07-03 CRAN (R 3.3.1)
## jsonlite     1.1      2016-09-14 CRAN (R 3.3.1)
## knitr        1.14    2016-08-13 CRAN (R 3.3.1)
## lazyeval    0.2.0   2016-06-12 CRAN (R 3.3.1)
## magrittr    1.5      2014-11-22 CRAN (R 3.3.1)
## memoise     1.0.0   2016-01-29 CRAN (R 3.3.0)
## munsell     0.4.3   2016-02-13 CRAN (R 3.3.0)
## numDeriv    2016.8-1 2016-08-27 CRAN (R 3.3.1)
## plotly      * 3.6.0   2016-05-18 CRAN (R 3.3.1)
## plyr        1.8.4   2016-06-08 CRAN (R 3.3.0)
## purrr       * 0.2.2   2016-06-18 CRAN (R 3.3.1)
## R6          2.1.3   2016-08-19 CRAN (R 3.3.1)
## RColorBrewer * 1.1-2   2014-12-07 CRAN (R 3.3.0)
## Rcpp        0.12.7  2016-09-05 CRAN (R 3.3.1)
## readr       * 1.0.0   2016-08-03 CRAN (R 3.3.1)
## readxl     * 0.1.1   2016-03-28 CRAN (R 3.3.1)
## rmarkdown   1.8      2017-11-17 CRAN (R 3.3.3)
## RMySQL      0.10.9  2016-05-08 CRAN (R 3.3.1)
## roxygen2    5.0.1   2015-11-11 CRAN (R 3.3.1)
## rprojroot   1.3-2   2018-01-03 CRAN (R 3.3.3)
## RSQLite     1.0.0   2014-10-25 CRAN (R 3.3.1)
## scales     0.5.0   2017-08-24 CRAN (R 3.3.3)
## stringi    1.1.6   2017-11-17 CRAN (R 3.3.3)
## stringr    * 1.1.0   2016-08-19 CRAN (R 3.3.1)
## tcpl       1.2.2   2016-05-18 CRAN (R 3.3.1)
## tibble     * 1.2     2016-08-26 CRAN (R 3.3.1)
## tidyr      * 0.6.0   2016-08-12 CRAN (R 3.3.1)
## tidyverse  * 1.0.0   2016-09-09 CRAN (R 3.3.2)
## toxplot    * 0.1.0   <NA>      local
## viridis    0.3.4   2016-03-12 CRAN (R 3.3.0)
## withr      1.0.2   2016-06-20 CRAN (R 3.3.1)
## yaml       2.1.13  2014-06-12 CRAN (R 3.3.0)

```

## Define basic assay info

```

#define the names of the primary and toxicity assay.
#names should match what's provided in the <assay> column of the input dataframe
assay_info <- list(
  prim_assay = "RAIU",
  toxi_assay = "Cytotox"
)

```

## Data Import

```
dt_sc <- read_csv("../input data files/NIS_ph1_v2_sc_lv10_for_tcpl.csv")
```

## Normalization

Each sample well is normalized as percentage of the DMSO median on each plate.

```
dt_sc_norm <- toxplot::normalize_per_plate(dt_sc, nctrl = "DMSO")
```

## Threshold of Significance

Now calculating 3bMAD and 3sigma value for the DMSO control in the single concentration assay as a whole.

```
sig_cutoff_sc <- dt_sc_norm %>%
  filter(spid == "DMSO") %>%
  summarize(bMAD = mad(nval_median, na.rm=TRUE),
            three_bMAD = 3*mad(nval_median, na.rm=TRUE))
knitr::kable(sig_cutoff_sc, digits = 2)
```

| bMAD | three_bMAD |
|------|------------|
| 6.83 | 20.5       |

## QC of Single-conc assay

Assay quality control measures were calculated by each 96-well plate.

To assess the quality of assay for each 96 well plate, the following metrics were used:

- CV of DMSO controls
- Z' score

The negative control DMSO wells' raw readings were used to calculate mean, standard deviation and CV for each plate.

Z' factor is calculated as follows:

$$Z' = 1 - \frac{3\sigma_{\text{positive control}} + 3\sigma_{\text{DMSO control}}}{|\mu_{\text{positive control}} - \mu_{\text{DMSO control}}|}$$

Note that in Z' calculation, because we only had one well of cytotox positive control, therefore sigma wasn't calculatable. Hence the Z' calculated for cytotox is unusable.

```
qc_sc <- qc_per_plate(dt_sc_norm, assay_info, resp = "nval_median")

qplot(unique_id, CV_DMSO, data = qc_sc$qc, color = assay) +
  ggtitle("CV of DMSO in Single-Con Assay") +
  xlab("Assay Plate ID") +
  scale_x_discrete(labels = NULL) +
  theme_bw()
```

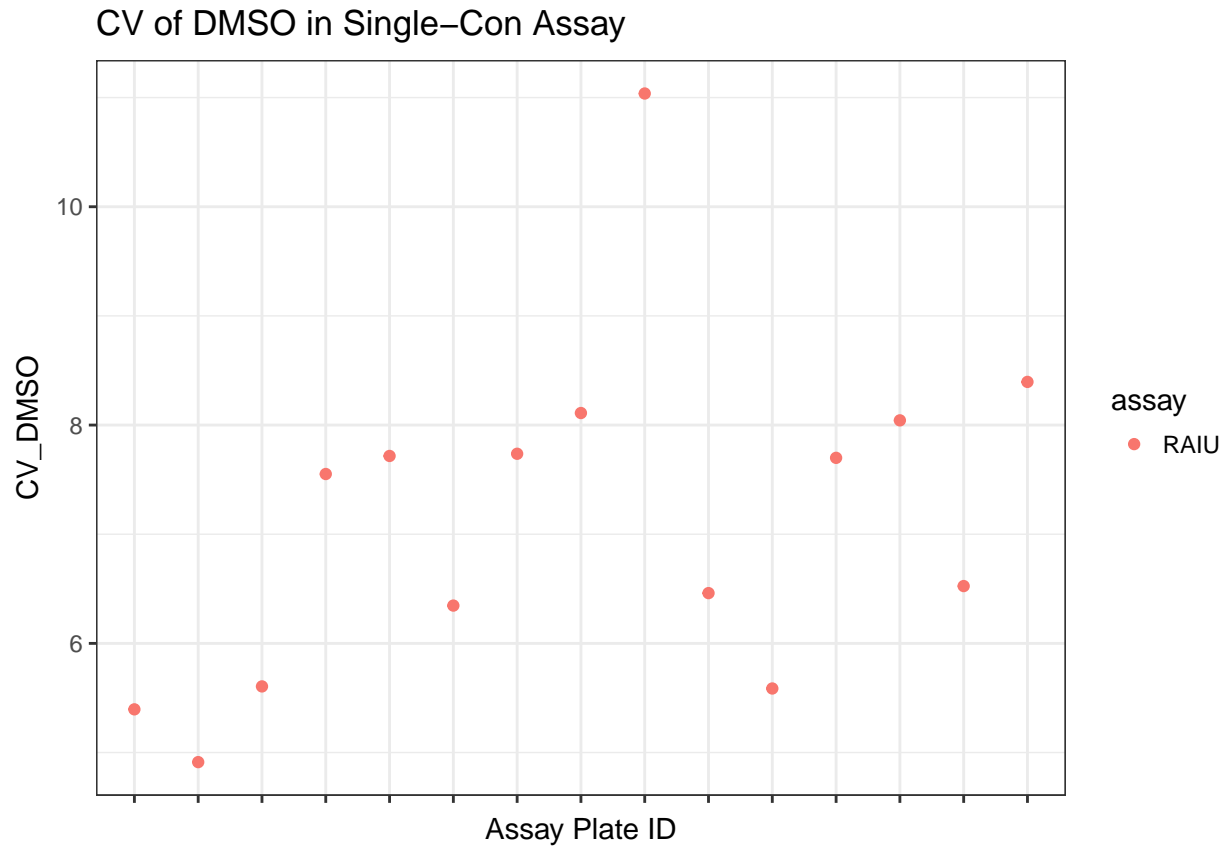

```
qplot(unique_id, Z_prime, data = qc_sc$qc, color = assay) +  
  ggtitle("Z' in Single-Con Assay") +  
  xlab("Assay Plate ID") +  
  scale_x_discrete(labels = NULL) +  
  theme_bw()
```

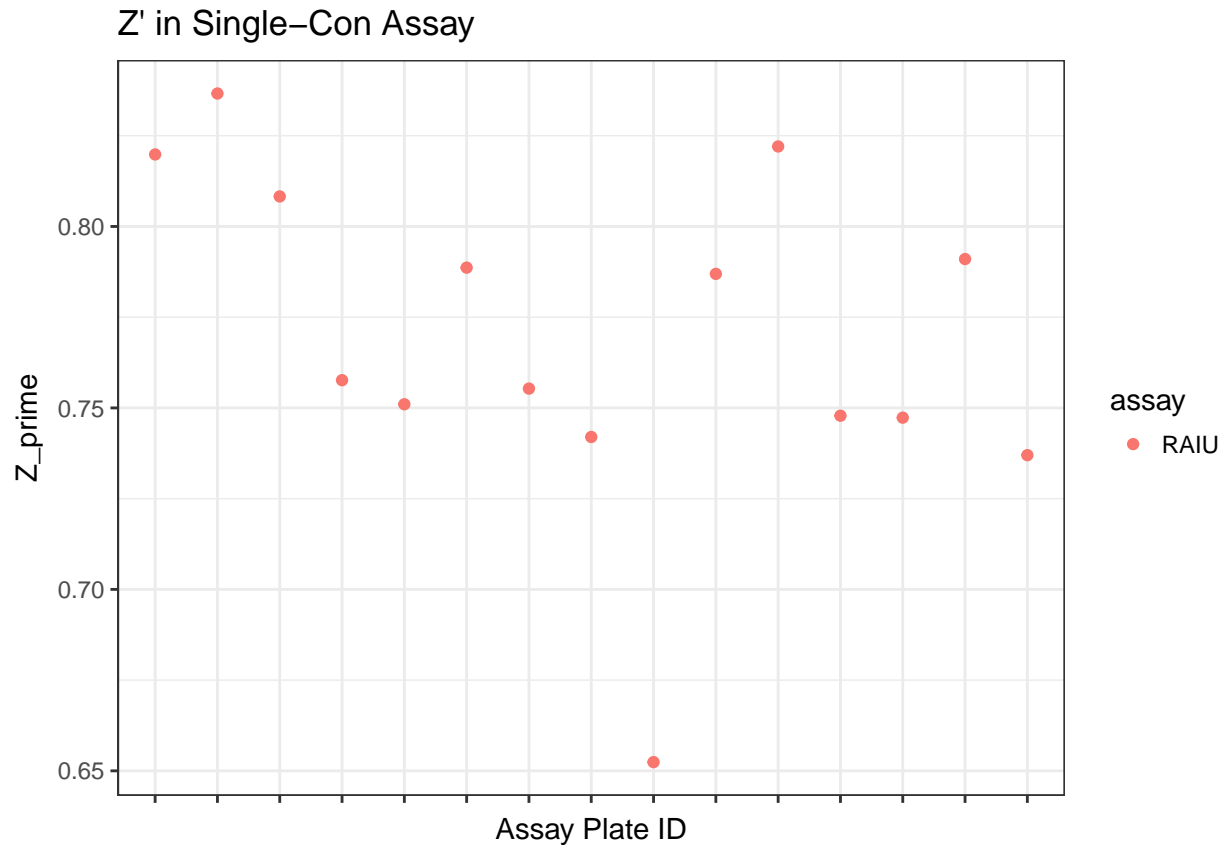

### QC Summary of Single-Con assay

```
library(psych)
qc_sc_t <- qc_sc$qc %>%
  dplyr::select(CV_DMSO, Z_prime) %>%
  describe
knitr::kable(qc_sc_t, digits = 2, caption = "Summary Single-Con Assay QC Metrics")
```

Table 2: Summary Single-Con Assay QC Metrics

|         | vars | n  | mean | sd   | median | trimmed | mad  | min  | max   | range | skew  | kurtosis | se   |
|---------|------|----|------|------|--------|---------|------|------|-------|-------|-------|----------|------|
| apid*   | 1    | 15 | NaN  | NA   | NA     | NaN     | NA   | Inf  | -Inf  | -Inf  | NA    | NA       | NA   |
| CV_DMSO | 2    | 15 | 7.14 | 1.56 | 7.55   | 7.01    | 1.52 | 4.91 | 11.04 | 6.13  | 0.68  | 0.19     | 0.40 |
| Z_prime | 3    | 15 | 0.77 | 0.05 | 0.76   | 0.77    | 0.04 | 0.65 | 0.84  | 0.18  | -0.72 | 0.40     | 0.01 |

All single-con QC metrics in a table

```
knitr::kable(dplyr::select(qc_sc$qc, apid, CV_DMSO, Z_prime),
  digits = 2,
  col.names = c("Plate", "CV of DMSO", "Z'"),
  caption = "QC metrics in Single-Conc Screening")
```

Table 3: QC metrics in Single-Conc Screening

| Plate          | CV of DMSO | Z'   |
|----------------|------------|------|
| TP0001498_rep1 | 5.40       | 0.82 |
| TP0001498_rep2 | 4.91       | 0.84 |
| TP0001498_rep3 | 5.61       | 0.81 |
| TP0001499_rep1 | 7.55       | 0.76 |
| TP0001499_rep2 | 7.72       | 0.75 |
| TP0001499_rep3 | 6.35       | 0.79 |
| TP0001500_rep1 | 7.74       | 0.76 |
| TP0001500_rep2 | 8.11       | 0.74 |
| TP0001500_rep3 | 11.04      | 0.65 |
| TP0001501_rep1 | 6.46       | 0.79 |
| TP0001501_rep2 | 5.59       | 0.82 |
| TP0001501_rep3 | 7.70       | 0.75 |
| TP0001502_rep1 | 8.04       | 0.75 |
| TP0001502_rep2 | 6.53       | 0.79 |
| TP0001502_rep3 | 8.40       | 0.74 |

### Single-Con Positive Control QC

```
## model single-con controls on each plate
sc_pos_raiu <- dt_sc_norm %>%
  filter(spid == "NaCl04") %>%
  mutate(spid = paste(spid, apid)) # change spid to distinguish NaCl04 on each plate.

sc_raiu_pos_md <- toxplot::fit_curve_tcpl(sc_pos_raiu,
                                         assay_info = list(prim_assay = "RAIU",
                                                            toxi_assay = NULL))
```

```
## Processing 15 samples(spid)....
## NaCl04 TP0001498_rep1 ||NaCl04 TP0001498_rep2 ||NaCl04 TP0001498_rep3 ||NaCl04 TP0001499_rep1 ||NaCl04 TP0001499_rep2 ||NaCl04 TP0001499_rep3 ||NaCl04 TP0001500_rep1 ||NaCl04 TP0001500_rep2 ||NaCl04 TP0001500_rep3 ||NaCl04 TP0001501_rep1 ||NaCl04 TP0001501_rep2 ||NaCl04 TP0001501_rep3 ||NaCl04 TP0001502_rep1 ||NaCl04 TP0001502_rep2 ||NaCl04 TP0001502_rep3
## Curve Fitting Completed!
## Calculation time: 1.7 secs
```

```
sc_raiu_pos_sum <- toxplot::summary_tcpl(sc_raiu_pos_md)
```

```
##plot AC50 for pos controls together
```

```
st <- sc_raiu_pos_sum %>%
  dplyr::select(AC50_prim, absEC50_prim, spid) %>%
  rename(AC50 = AC50_prim, absEC50 = absEC50_prim) %>%
  gather(key=Metric, value= value, AC50, absEC50)

ggplot(st, aes(spid, value)) +
  geom_point(aes(color=Metric), alpha=0.8, size=3)+
  #facet_grid(Metric~., scale="free")+
  scale_x_discrete(labels=NULL)+
  ggtitle("AC50 & absEC50 of Positive Control(NaCl04) in Single-Con Assay")+
  xlab("Assay Plate ID") +
  ylab("Concentration (logM)") +
  theme(plot.title = element_text(hjust=0.5)) +
  theme_bw()
```

AC50 & absEC50 of Positive Control(NaClO<sub>4</sub>) in Single-Con Assay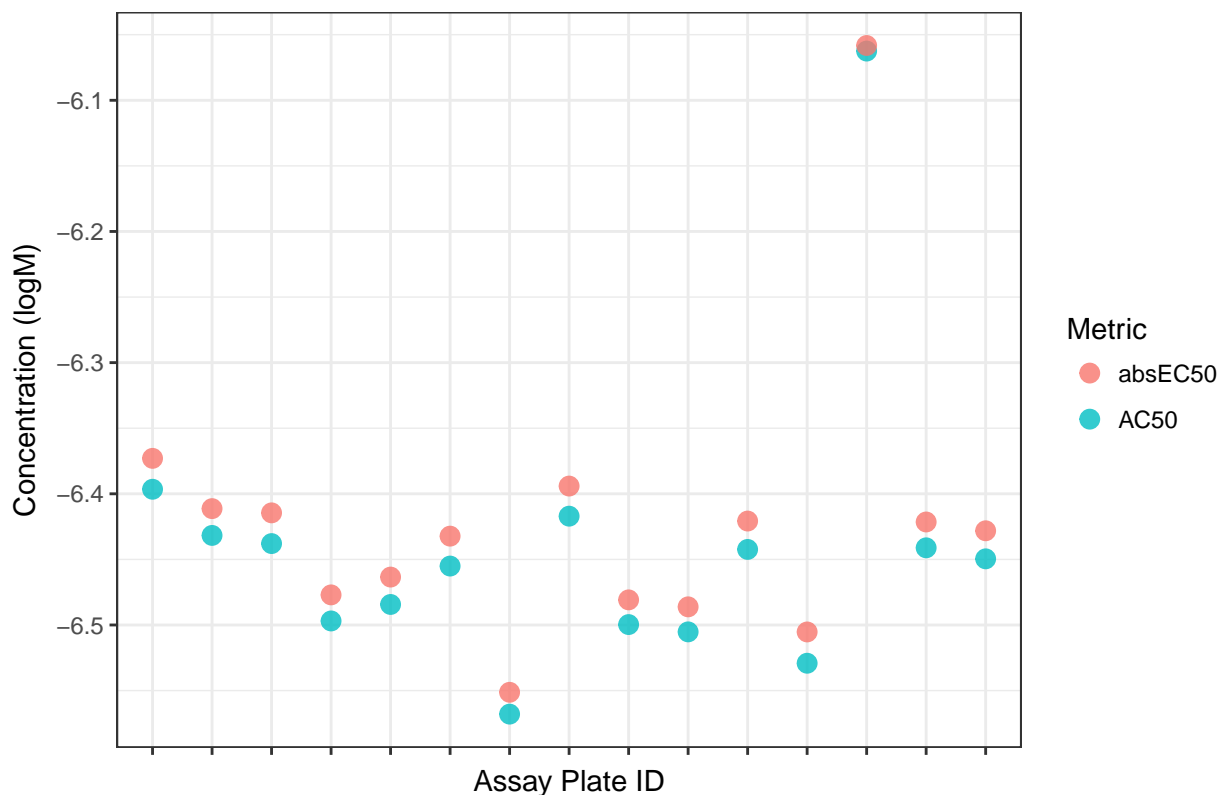

```
#theme(legend.position = "none")

#summary
library(psych)
sc_pos_sum_raiu <- sc_raiu_pos_sum %>%
  dplyr::select(AC50_prim, absEC50_prim) %>%
  rename(AC50=AC50_prim, absEC50 = absEC50_prim) %>%
  describe
knitr::kable(sc_pos_sum_raiu, digits = 2,
  caption="Summary of single-con RAIU positive control IC50s")
```

Table 4: Summary of single-con RAIU positive control IC50s

|         | vars | n  | mean  | sd   | median | trimmed | mad  | min   | max   | range | skew | kurtosis | se   |
|---------|------|----|-------|------|--------|---------|------|-------|-------|-------|------|----------|------|
| AC50    | 1    | 15 | -6.44 | 0.11 | -6.45  | -6.46   | 0.05 | -6.57 | -6.06 | 0.51  | 2.28 | 5.19     | 0.03 |
| absEC50 | 2    | 15 | -6.42 | 0.11 | -6.43  | -6.44   | 0.05 | -6.55 | -6.06 | 0.49  | 2.18 | 4.85     | 0.03 |

## Single-Con Controls

```
#only take the NaClO4 wells at 1E-4M
s1 <- dt_sc_norm %>% filter(wllt!="t", spid!="NaClO4")
s2 <- dt_sc_norm %>% filter(spid=="NaClO4", conc== 1E-4)
s3 <- bind_rows(s1, s2)
```



```

sc_ctrl_sum <- s3 %>%
  filter(wllt != "t") %>%
  mutate(resp=nval_median) %>%
  #rename("NaClO4(1E-4M)F"=NaClO4) %>%
  group_by(spид) %>%
  summarize(mean = mean(resp),
            sd = sd(resp),
            min = min(resp),
            max = max(resp),
            CV = sd/mean*100)
knitr::kable(sc_ctrl_sum, digits =2, caption="Single-Con control summary stats")

```

Table 5: Single-Con control summary stats

| spид   | mean   | sd   | min   | max    | CV    |
|--------|--------|------|-------|--------|-------|
| 2,4-D  | 92.41  | 4.24 | 83.91 | 100.71 | 4.59  |
| DMSO   | 100.63 | 7.11 | 71.69 | 116.19 | 7.06  |
| NaClO4 | 2.85   | 0.36 | 2.08  | 3.84   | 12.60 |
| NaNO3  | 81.25  | 7.56 | 63.47 | 93.21  | 9.31  |
| NaSCN  | 20.64  | 1.12 | 18.56 | 23.05  | 5.41  |

```

# plot all sc controls
ggplot(filter(s3, wllt != "t"), aes(apид, nval_median)) +
  geom_point(aes(color=apид), alpha=0.6) +
  facet_grid(spид~.) +
  scale_y_continuous(limits= c(-20,140), breaks= seq(from=-20, to=140, by=20)) +
  #scale_x_discrete(breaks=NULL)+
  scale_x_discrete(labels=NULL)+
  ylab("Normalized Response") +
  xlab("Assay Plate ID")+
  ggtitle("Response of controls in 15 Single-Conc assay plates")+
  theme_bw()+
  theme(legend.position = "none") +
  theme(plot.title=element_text(hjust=0.5))

```

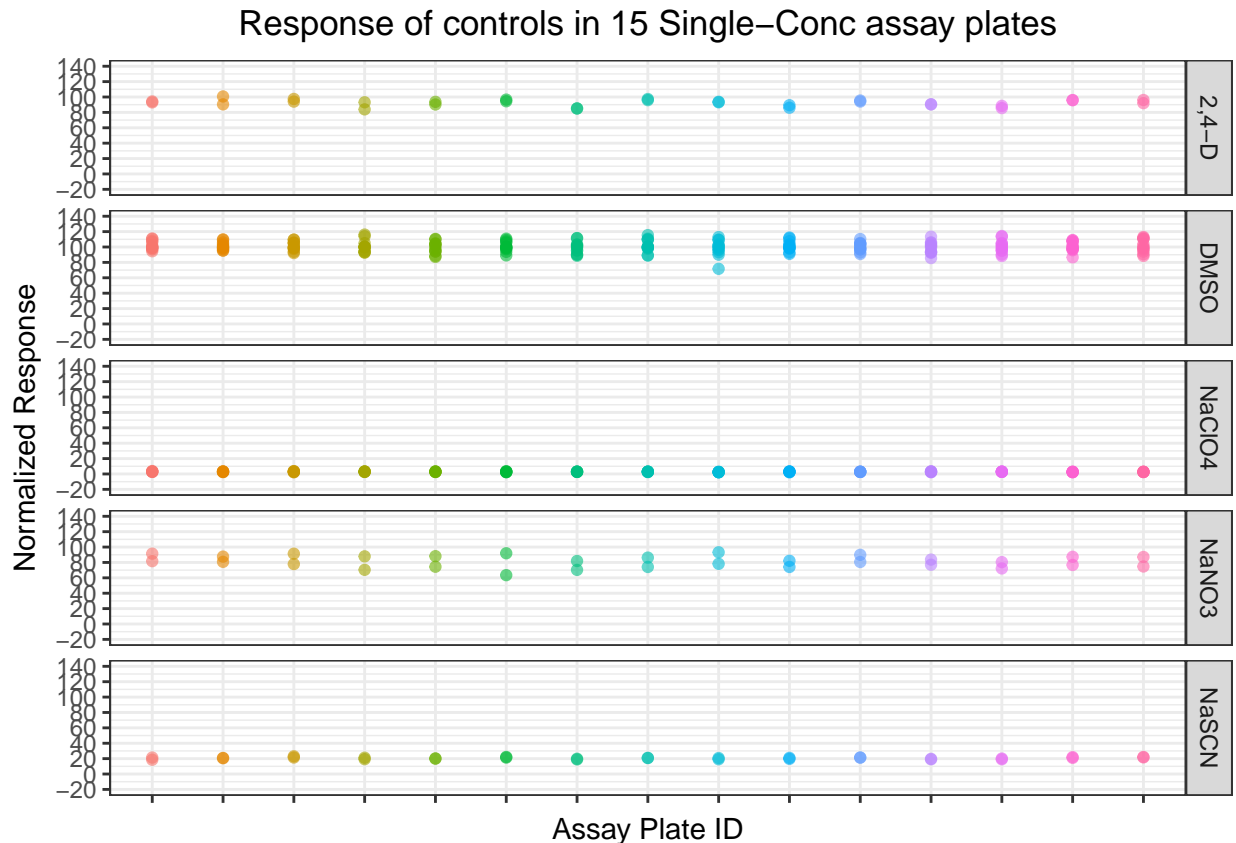

## Visualize the single concentration data

A total of 310 chemical samples was tested in the single-con and 169 were further tested in multi-concentration. The plot below showed the median, max, and min value for each tested chemical, and coloring shows which chemical were carried on to the multi-con assay. Because the assay has 3 replicates, so all three replicate's data are actually plotted in this figure.

```
#calculate median, max and min value
sc_median <- dt_sc_norm %>% ungroup() %>%
  filter(str_detect(dt_sc_norm$spid, "^TP*")) %>%
  mutate(welltype = "sample") %>%
  group_by(pid, spid) %>%
  summarize(
    median = median(nval_median),
    up_range = max(nval_median),
    lo_range = min(nval_median),
    range = max(nval_median) - min(nval_median)
  ) %>%
  ungroup() %>%
  mutate(mc_test = ifelse(median < 80, "Yes", "No")) %>%
  arrange(median)
##Plot single con median+range plot.

fig2 <- ggplot(sc_median, aes(x=reorder(spids, -median), y=median, color=mc_test)) +
```

```

geom_point(size=1.5, alpha=0.6) +
geom_errorbar(aes(ymax=up_range, ymin=lo_range), alpha=0.8, size = 0.5) +
xlab("Chemicals, ordered by increasing iodide uptake inhibition") +
ylab("Iodide Uptake (% of control)") + scale_x_discrete(breaks=NULL) +
#ggtitle("Median and Response of Test Chemicals") +
geom_hline(yintercept = 80, linetype="dashed", color="violetred1") +
geom_hline(yintercept = 100, alpha=0.8) +
geom_text(data = NULL, x = 270, y = 103, label = "DMSO Control", color = "grey30") +
geom_text(data = NULL, x = 270, y = 83, label = "20% Inhibition", color = "grey30") +
scale_y_continuous(breaks = seq(from = 0, to =100, by=20)) +
scale_color_brewer(palette="Set1", name= "Multi-Conc Assay", labels= c("No", "Yes")) +
theme_few(base_size = 12) +
theme(legend.position = c(0.15, 0.1), legend.background = element_blank())

```

fig2

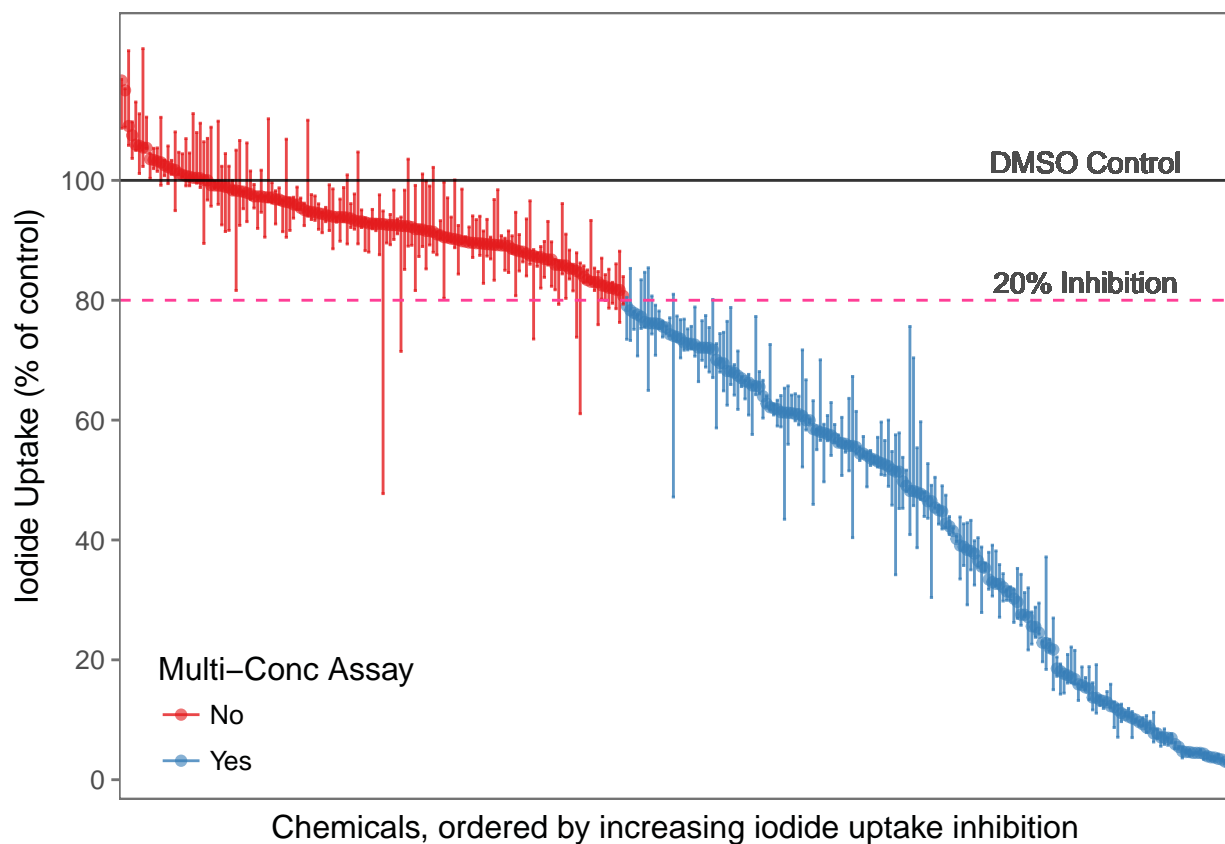

```
#ggsave("./output plots/fig2.tiff", fig2, dpi = 900, width = 7, height = 5, compression = "lzw")
```

## Multi-Conc Analysis

### Import MC data

```

#Get the spid of the 169 chemicals entering multi-con test.
dt_mc_ls <- read_csv("./input data files/NIS_ph1_v2_mc_lv10_for_tcp1_raiu.csv", na = "NA") %>%

```

```

  select(spид)
mc_chem_list <- unique(dt_mc_ls$spид)[- (1:6)]
ls169 <- sc_median %>%
  filter(mc_test=="Yes") %>%
  dplyr::select(spид)

ls11 <- data.frame(mc_chem_list) %>%
  mutate(flag = (mc_chem_list %in% ls169$spид)) %>%
  filter(flag==FALSE) %>%
  dplyr::select(mc_chem_list) %>% rename(spид=mc_chem_list)

spид_chnm_table <- read_excel("./raw data files/EPA_11700_EPA-SLaws_ph1v2_150ul_20170125_key.xlsx")

spид_chnm_table <- spид_chnm_table %>%
  dplyr::select(EPA_Sample_ID, CASRN, Preferred_Name)
# rename the column title to be compatible with tcpl package.
names(spид_chnm_table) <- c("spид", "casn", "chnm")

# Import MC data (look at the 169 chemicals)
mc_lv10_raiu_update <-
  read_csv("./input data files/NIS_ph1_v2_mc_lv10_for_tcpl_raiu.csv") %>%
  filter(!(spид %in% ls11$spид))

mc_lv10_cyto_update <-
  read_csv("./input data files/NIS_ph1_v2_mc_lv10_for_tcpl_cytotox.csv") %>%
  filter(!(spид %in% ls11$spид))

dt_mc <- bind_rows(mc_lv10_cyto_update, mc_lv10_raiu_update)

```

## Normalization

Normalize raw response to the median of DMSO controls, calculated per plate.

```
dt_mc_norm <- toxplot::normalize_per_plate(dt_mc)
```

## 3bMAD of MC

```

#create concentration index
dt_mc_norm <- dt_mc_norm %>%
  group_by(spид) %>%
  mutate(cndx = generate_index(conc)) %>%
  ungroup
sig_mc <- dt_mc_norm %>%
  mutate(neg_nval_median= 100 - nval_median) %>%
  group_by(assay) %>%
  dplyr::filter(wllt == "t") %>%
  dplyr::filter(cndx == 1 | cndx == 2) %>%
  summarise(bMAD = mad(neg_nval_median, na.rm = TRUE),
            three_bMAD=3*mad(neg_nval_median, na.rm = TRUE))
knitr::kable(sig_mc, digits =2)

```

| assay   | bMAD | three_bMAD |
|---------|------|------------|
| Cytotox | 5.89 | 17.68      |
| RAIU    | 7.93 | 23.78      |

## Multi-Con QC

```
##extract mc related data frame
d_pos_cyto <- dt_mc_norm %>% filter(assay == "Cytotox", wllt=="pc")
d_pos_raiu <- dt_mc_norm %>% filter(assay == "RAIU", wllt=="pr")

d_neg_cyto <- dt_mc_norm %>% filter(assay == "Cytotox", wllt=="nrc")
d_neg_raiu <- dt_mc_norm %>% filter(assay == "RAIU", wllt=="nrc")
d_ec80_raiu <- dt_mc_norm %>% filter(assay == "RAIU", wllt=="pr_ec80")
d_ec20_raiu <- dt_mc_norm %>% filter(assay == "RAIU", wllt=="pr_ec20")

##plot all DCNQ in multi-con
g_cyto_pos <- qplot(data=d_pos_cyto, x=log10(conc), y=nval_median) +
  labs(
    x = "Concentration (logM)",
    y = "% Control Activity"
  ) +
  geom_point(
    color = "#F8766D",
    shape = 1,
    alpha = 0.5,
    size = 1.8
  ) +
  coord_fixed(
    ylim = c(0, 125),
    xlim = c(-9, -4),
    ratio = 2 / 70
  ) +
  scale_y_continuous(breaks = seq(
    from = 0,
    to = 120,
    by = 20
  )) +
  theme_bw() +
  theme(legend.title = element_blank())+
  theme(plot.title=element_text(hjust=0.5))
g_cyto_pos
```

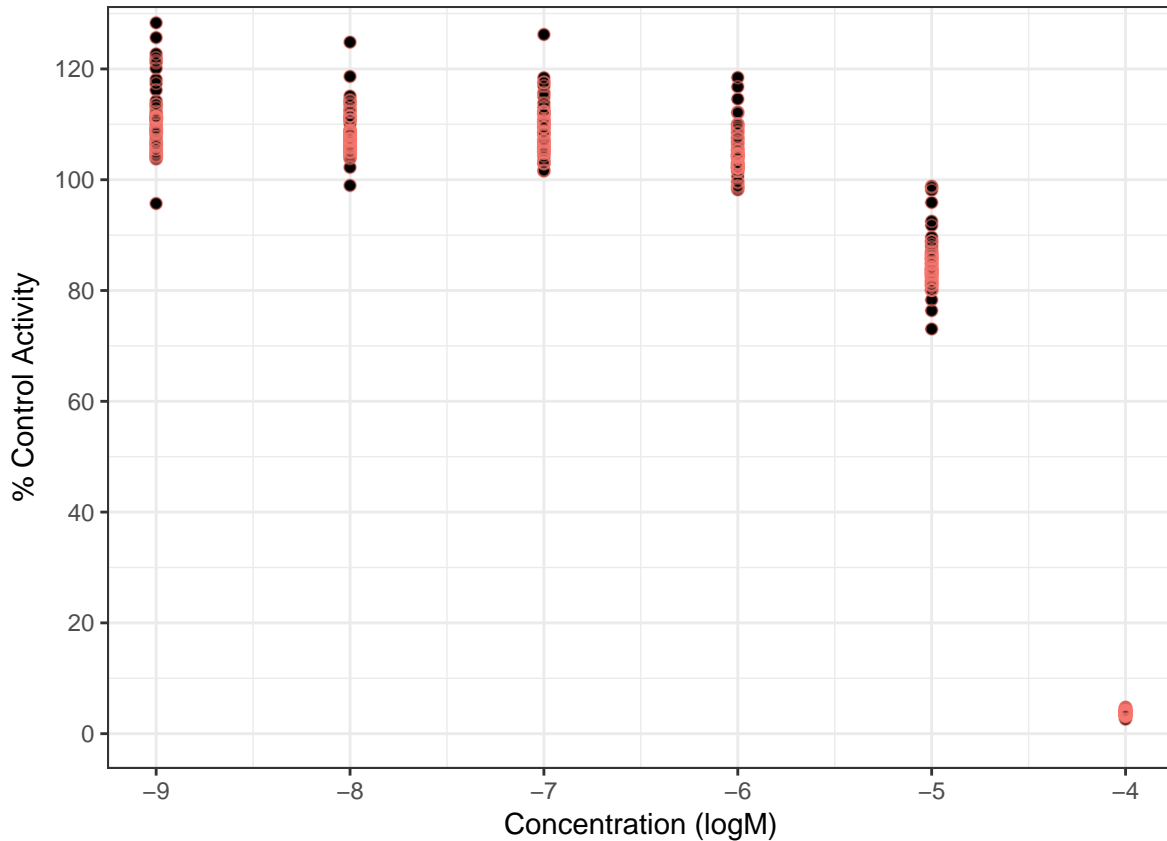

```
##plot all NaClO4 in multi-con
g_raiu_pos <- qplot(data=d_pos_raiu, x=log10(conc), y=nval_median) +
  labs(
    x = "Concentration (logM)",
    y = "% Control Activity"
  ) +
  geom_point(
    color = "#00BFC4",
    shape = 1,
    alpha = 0.5,
    size = 1
  ) +
  coord_fixed(
    ylim = c(0, 125),
    xlim = c(-9, -4),
    ratio = 2 / 70
  ) +
  scale_y_continuous(breaks = seq(
    from = 0,
    to = 120,
    by = 20
  )) +
  theme_bw() +
  theme(legend.title = element_blank()) +
  theme(plot.title=element_text(hjust=0.5))
g_raiu_pos
```

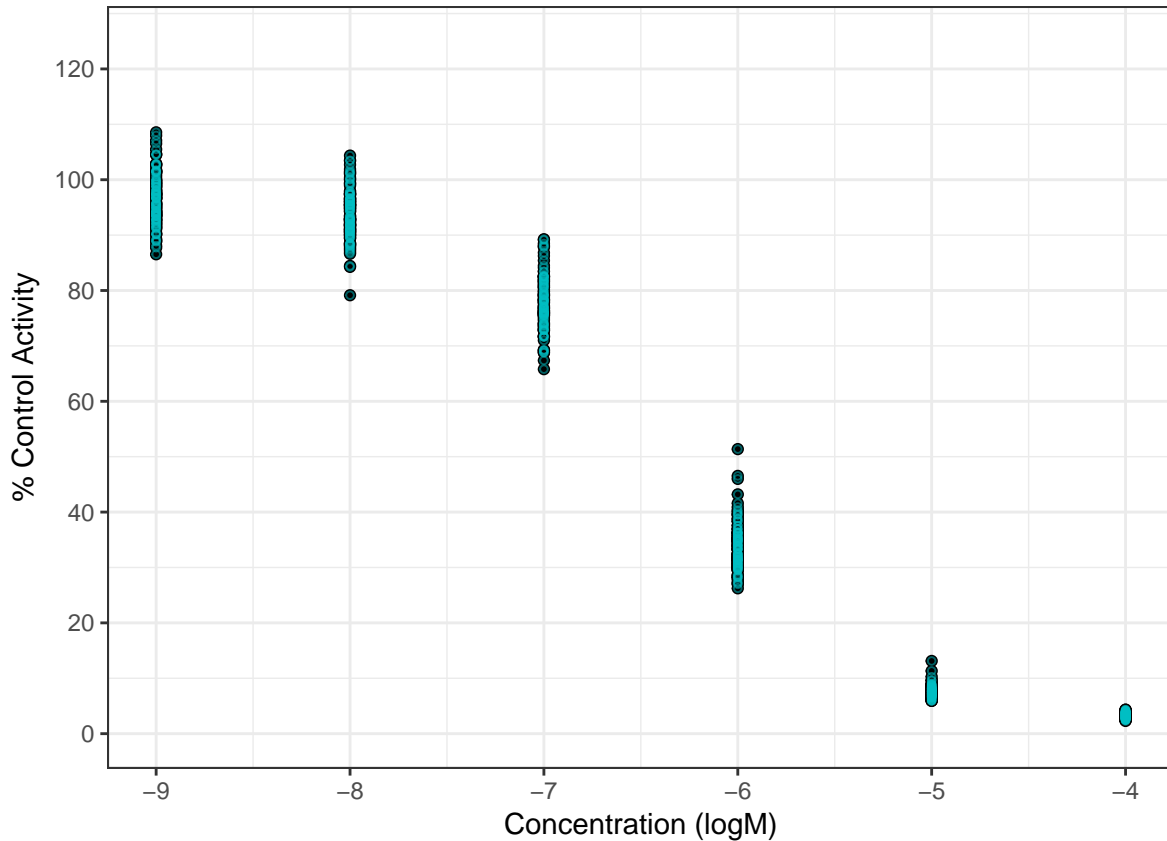

```
# Obtain AC50 and absEC50 for the positive controls
```

```
d_pos_raiu <- mutate(d_pos_raiu, spid = paste(spid, apid, sep = "_"))
pos_raiu_md <- toxplot::fit_curve_tcpl(df = d_pos_raiu,
                                     assay_info = list(prim_assay = "RAIU",
                                                       toxi_assay = NULL))
```

```
## Processing 54 samples(spid)....
## NaCl04_Plate_1_rep1 ||NaCl04_Plate_1_rep2 ||NaCl04_Plate_1_rep3 ||NaCl04_Plate_10_rep1 ||NaCl04_Plate_10_rep2
## Curve Fitting Completed!
## Calculation time: 7.2 secs
```

```
raiu_pos_tbl <- toxplot::summary_tcpl(pos_raiu_md)
d_pos_cyto <- mutate(d_pos_cyto, spid = paste(spid, apid, sep = "_"))
pos_cyto_md <- toxplot::fit_curve_tcpl(df = d_pos_cyto,
                                       assay_info = list(prim_assay = NULL,
                                                         toxi_assay = "Cytotox"))
```

```
## Processing 54 samples(spid)....
## DCNQ_Plate_1_rep1 ||DCNQ_Plate_1_rep2 ||DCNQ_Plate_1_rep3 ||DCNQ_Plate_10_rep1 ||DCNQ_Plate_10_rep2
## Curve Fitting Completed!
## Calculation time: 3.9 secs
```

```
cyto_pos_tbl <- toxplot::summary_tcpl(pos_cyto_md)
#this is the modelling results for all mc positive
pos_tbl <- bind_rows(cyto_pos_tbl, raiu_pos_tbl)
```

Summarize AC50s of positive controls in multi-con assay.

```
##summarizing AC50s of positive controls.
library(psych)
pos_sum_raiu <- raiu_pos_tbl %>%
  dplyr::select(AC50_prim, absEC50_prim) %>%
  describe

pos_sum_cyto <- cyto_pos_tbl %>%
  dplyr::select(AC50_toxi, absEC50_toxi) %>%
  describe

knitr::kable(pos_sum_raiu, digits = 2,
             caption="Summary of RAIU positive control IC50s")
```

Table 7: Summary of RAIU positive control IC50s

|              | vars | n  | mean  | sd   | median | trimmed | mad  | min   | max   | range | skew | kurtosis | se   |
|--------------|------|----|-------|------|--------|---------|------|-------|-------|-------|------|----------|------|
| AC50_prim    | 1    | 54 | -6.38 | 0.13 | -6.41  | -6.40   | 0.11 | -6.57 | -6.04 | 0.53  | 1.04 | 0.83     | 0.02 |
| absEC50_prim | 2    | 54 | -6.36 | 0.13 | -6.39  | -6.38   | 0.10 | -6.54 | -6.04 | 0.51  | 0.89 | 0.52     | 0.02 |

```
knitr::kable(pos_sum_cyto, digits = 2,
             caption="Summary of Cytotox positive control IC50s")
```

Table 8: Summary of Cytotox positive control IC50s

|              | vars | n  | mean  | sd   | median | trimmed | mad  | min   | max   | range | skew | kurtosis | se   |
|--------------|------|----|-------|------|--------|---------|------|-------|-------|-------|------|----------|------|
| AC50_toxi    | 1    | 54 | -4.83 | 0.12 | -4.88  | -4.86   | 0.03 | -4.92 | -4.47 | 0.45  | 1.98 | 2.87     | 0.02 |
| absEC50_toxi | 2    | 54 | -4.83 | 0.10 | -4.88  | -4.85   | 0.03 | -4.92 | -4.55 | 0.37  | 1.75 | 1.74     | 0.01 |

## Multi-Con Controls

Visualize all controls in MC. NaClO<sub>4</sub> and DCNQ are plotted using the 1E-4M concentration wells.

```
m3 <- dt_mc_norm %>%
  filter(!wllt %in% c("t")) %>%
  filter(!(spid %in% c("NaClO4", "DCNQ")))

m4 <- dt_mc_norm %>%
  filter(spid %in% c("NaClO4", "DCNQ")) %>%
  filter(conc == 1e-4)

m31 <- bind_rows(m3, m4)

## facet plots of all controls' data points
ggplot(m31, aes(apid, nval_median)) +
  geom_point(aes(color=apid), alpha=0.7) +
  facet_grid(spid~assay) +
  scale_y_continuous(limits= c(-20,140), breaks= seq(from=-20, to=140, by=20)) +
  scale_x_discrete(labels=NULL)+
  ylab("% Control Activity") +
  xlab("Assay Plate ID")+
```



```
ggtitle("Response of controls in all 54 multi-conc assay plates")+
theme_bw()+
theme(legend.position = "none",
      plot.title=element_text(hjust=0.5))
```

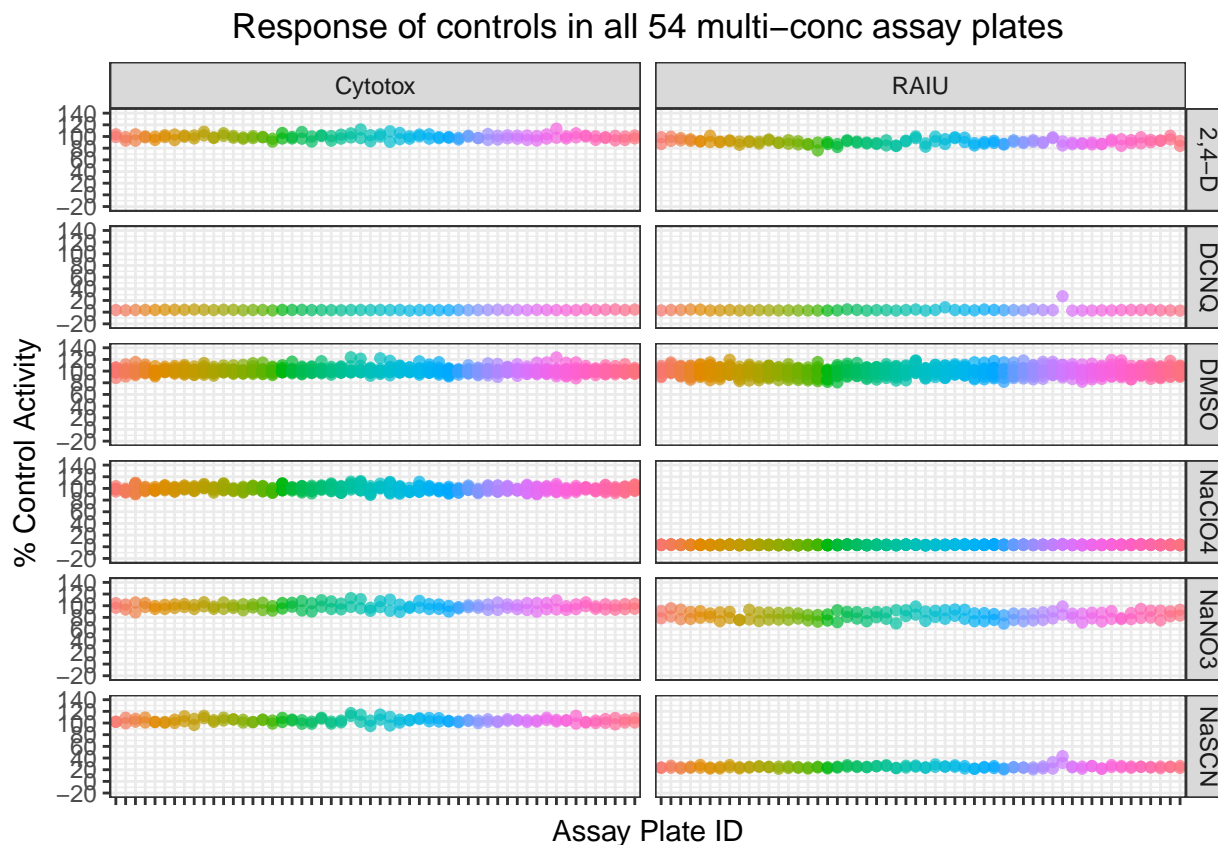

```
##print the control stats table.
mc_ctrl_sum <- m31 %>%
  filter(wllt != "t") %>%
  mutate(resp=nval_median) %>%
  group_by(assay, spid) %>%
  summarize(mean = mean(resp),
            sd = sd(resp),
            min = min(resp),
            max = max(resp),
            CV = sd/mean*100)
knitr::kable(mc_ctrl_sum, digits = 2,
             caption = "Multi-Conc Control Summary Stats")
```

Table 9: Multi-Conc Control Summary Stats

| assay   | spid   | mean   | sd   | min   | max    | CV    |
|---------|--------|--------|------|-------|--------|-------|
| Cytotox | 2,4-D  | 99.34  | 4.21 | 90.92 | 113.31 | 4.24  |
| Cytotox | DCNQ   | 3.72   | 0.38 | 2.62  | 4.76   | 10.33 |
| Cytotox | DMSO   | 100.92 | 5.41 | 87.82 | 123.66 | 5.36  |
| Cytotox | NaClO4 | 99.19  | 4.69 | 89.12 | 112.51 | 4.73  |
| Cytotox | NaNO3  | 98.95  | 5.43 | 88.64 | 112.92 | 5.49  |

| assay   | spid   | mean   | sd   | min   | max    | CV    |
|---------|--------|--------|------|-------|--------|-------|
| Cytotox | NaSCN  | 104.30 | 3.98 | 94.83 | 117.03 | 3.81  |
| RAIU    | 2,4-D  | 90.86  | 4.49 | 76.22 | 101.30 | 4.94  |
| RAIU    | DCNQ   | 3.92   | 3.37 | 2.58  | 27.36  | 85.98 |
| RAIU    | DMSO   | 99.50  | 8.28 | 80.77 | 119.46 | 8.32  |
| RAIU    | NaClO4 | 3.28   | 0.38 | 2.30  | 4.33   | 11.47 |
| RAIU    | NaNO3  | 83.08  | 7.17 | 69.45 | 98.80  | 8.63  |
| RAIU    | NaSCN  | 24.69  | 2.71 | 20.47 | 43.17  | 10.99 |

## Sodium Perchlorate & DCNQ

On each assay plate, sodium perchlorate and DCNQ were included in six concentrations to serve as positive controls for RAIU and Cytotox assay. Here they are modelled separately by each assay plate.

```
# perchlorate
dt_perchlorate <- dt_mc_norm %>% filter(spид == "NaClO4") %>%
  mutate(spид = paste(spид, pid, rep, sep = "_"))
#dt_perchlorate <- dt_mc_norm %>% filter(spид == "NaClO4")
perchlorate_md <- fit_curve_tcpl(dt_perchlorate,
  assay_info = list(prim_assay = "RAIU",
                    toxi_assay = "Cytotox"),
  prim_cutoff = 23.78165,
  toxi_cutoff = 17.68251)
```

```
## Processing 54 samples(spид)...
## NaClO4_Plate_1_rep1 ||NaClO4_Plate_1_rep2 ||NaClO4_Plate_1_rep3 ||NaClO4_Plate_10_rep1 ||NaClO4_Plate_10_rep2
## Curve Fitting Completed!
## Calculation time: 7.9 secs
```

```
perchlorate_rank <- rank_tcpl(perchlorate_md)
#perchlorate_rank$taa %>% median
perchlorate_plots <- plot_tcpl(perchlorate_md, perchlorate_rank, notation = T)
perchlorate_plots[[1]]
```

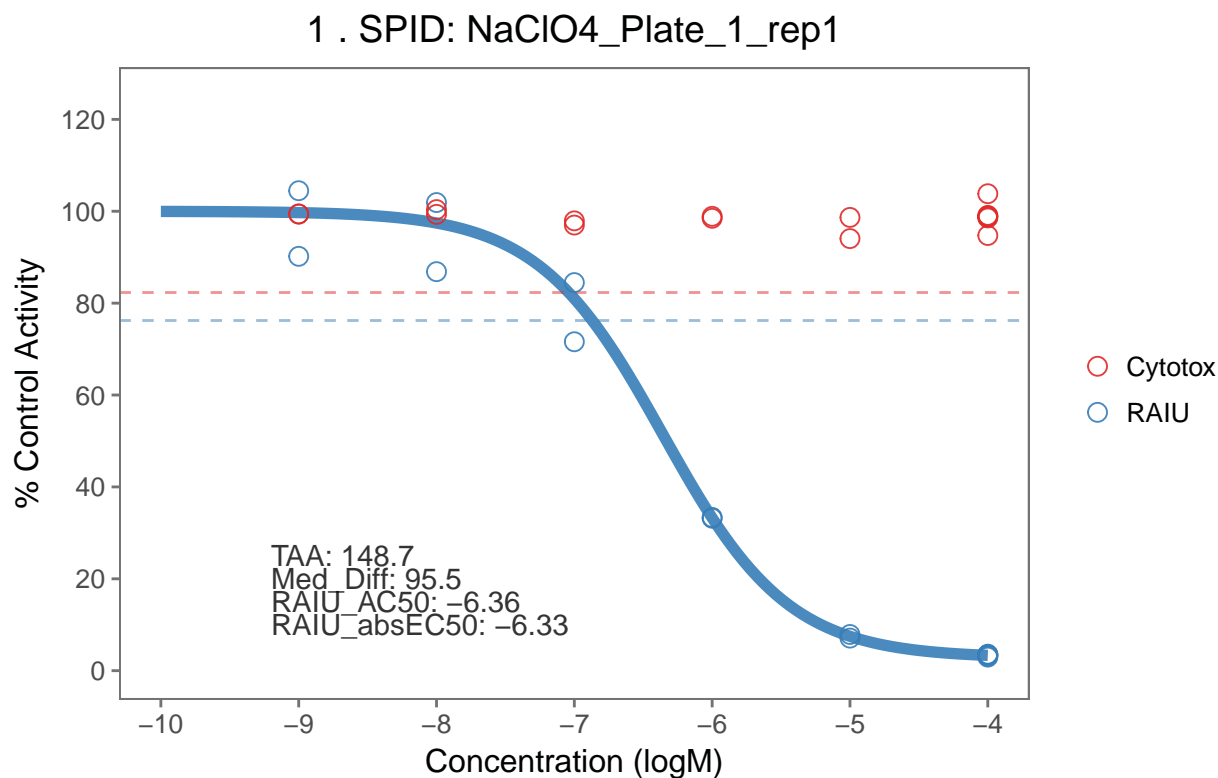

```
# DCNQ
dt_dcnq <- dt_mc_norm %>% filter(spid == "DCNQ") %>%
  mutate(spid = paste(spid, pid, rep, sep = "_"))
dcnq_md <- fit_curve_tcpl(dt_dcnq,
  assay_info = list(prim_assay = "RAIU",
                    toxi_assay = "Cytotox"),
  prim_cutoff = 23.78165,
  toxi_cutoff = 17.68251)
```

```
## Processing 54 samples(spid)....
## DCNQ_Plate_1_rep1 ||DCNQ_Plate_1_rep2 ||DCNQ_Plate_1_rep3 ||DCNQ_Plate_10_rep1 ||DCNQ_Plate_10_rep2
## Curve Fitting Completed!
## Calculation time: 8.5 secs
```

```
dcnq_rank <- rank_tcpl(dcnq_md)
dcnq_plots <- plot_tcpl(dcnq_md, dcnq_rank, notation = T)
dcnq_plots[[1]]
```

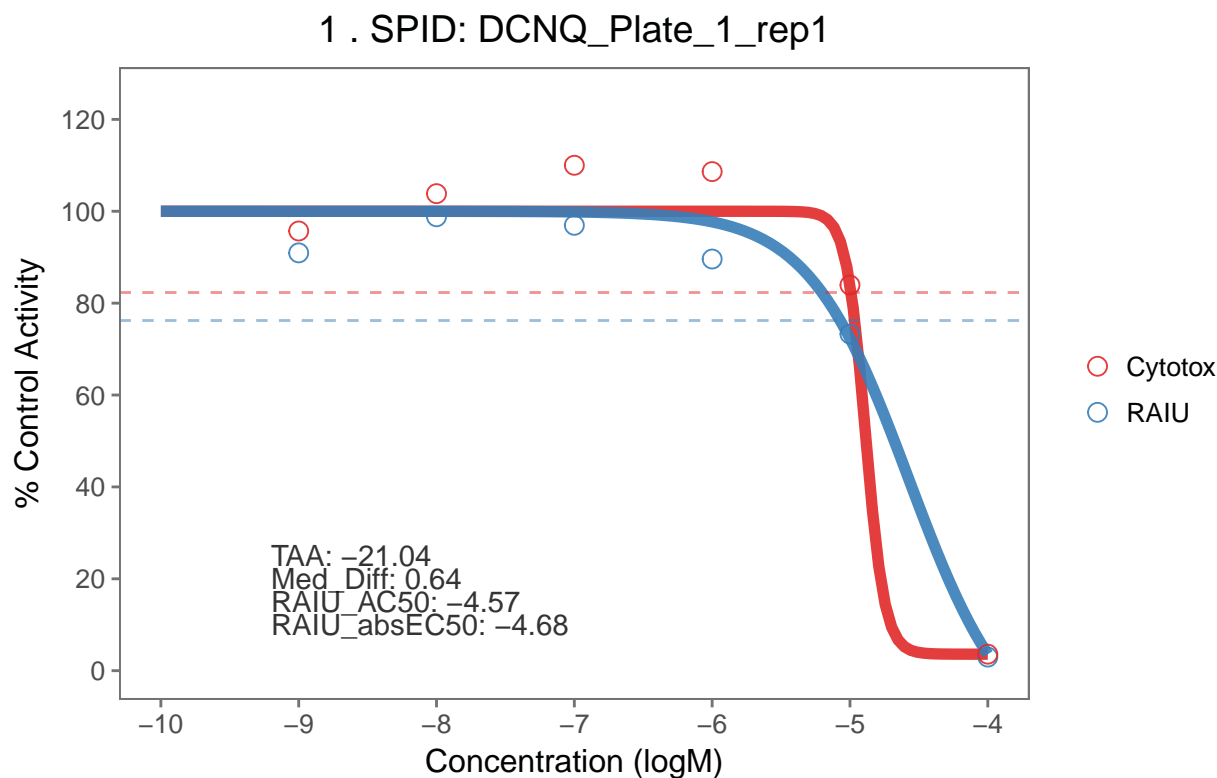

```
# Export all Sodium Perchlorate and DCNQ plots into one pdf supplemental file
l3 <- append(perchlorate_plots, dcnq_plots)
# save_plot_pdf(l3, "./output/plots/perchlorate_dcnq_curves.pdf")
```

## Dose-response modeling

The model used here is the Hill model provided in `tcpl` R package.

$$f(x) = \frac{tp}{1 + 10^{(ga-x)gw}}$$

Where  $x$  is the log concentration,  $tp$  is the top asymptote,  $ga$  is the AC50 (the log concentration where the modeled activity equals 50% of the top asymptote), and  $gw$  is the hill coefficient. The Hill model provided in the `tcpl` R package constrains the three parameters as following:

- (1)  $0 \leq tp \leq 1.2$  times the maximum response value
- (2)  $(\text{minimum log concentration} - 2) \leq ga \leq (\text{maximum log concentration} + 0.5)$
- (3)  $0.3 \leq gw \leq 8$

The modelling is done using a wrapper function `fit_curve_tcpl` in `ToxPlot` package, which serves as a convenient interface to use the `tcplFit` function in the `tcpl` package, and returns a list object containing all data and modeling results.

```
mc_model <- fit_curve_tcpl(df = filter(dt_mc_norm, wllt == "t"),
  assay_info = list(prim_assay = "RAIU", toxi_assay = "Cytotox"),
  prim_cutoff = 23.78165, toxi_cutoff = 17.68251)
```

```
## Processing 169 samples(spид)....
```

```
## TP0001498A01 ||TP0001498B02 ||TP0001498B05 ||TP0001498B07 ||TP0001498B08 ||TP0001498B09 ||TP0001498B
```

```
## Curve Fitting Completed!
```

```
## Calculation time: 26.5 secs
```

## Rank Chemicals

To prioritize the chemicals for potential NIS inhibition activity, a ranking score was calculated using two metrics that take into account the potential confounding impact of cytotoxicity on identifying RAIU inhibition activity: 1) toxicity-adjusted area (TAA) and 2) the difference of median responses of RAIU and cytotoxicity at maximum tested concentration (Median-Difference). TAA was defined by the maximum concentration vertical line (right border), the significant threshold horizontal line for RAIU assay (top border), and the dose-response curves of RAIU and cell viability results. The numeric value of TAA is penalized when a chemical demonstrates strong cytotoxicity. Median-Difference was calculated using the median of cell viability responses minus the median of RAIU responses at the maximum testing concentration (usually 100  $\mu$ M). Larger separations between RAIU and cytotoxicity are reflected in larger Median-Difference values. To rank test chemicals, NaClO<sub>4</sub> was used as the reference to normalize the TAA and Median-Difference of each test chemical. Specifically, the TAA and Median-Difference values of NaClO<sub>4</sub> positive control included on each of the 54 multi-concentration testing plates were first calculated to obtain the median of NaClO<sub>4</sub> TAA and Median-Difference (150.03 and 95.67 respectively). Then the TAA and Median-Difference of test chemicals were normalized as the percentage of the median NaClO<sub>4</sub> TAA and Median-Difference separately and then summed to obtain a chemical ranking score. The ranking score of 200 represents the potency of the referenced NaClO<sub>4</sub>.

```
median(perchlorate_rank$taa)
```

```
## [1] 151.0348
```

```
median(perchlorate_rank$med_diff)
```

```
## [1] 95.66618
```

```
# calculate ranking metrics, normalize to sodium perchlorate
```

```
sum_tbl <- toxplot::rank_tcpl(mc_model, spид_chnm_table,
  med_taa = median(perchlorate_rank$taa),
  med_med_diff = median(perchlorate_rank$med_diff))
```

```
#write_csv(sum_tbl, "./output data files/Phase1_rank_table.csv")
```

## Ranking Score Plot (Fig.2)

Use color to indicate chemicals that have significant RAIU but no significant cytotoxicity at any given concentration.

```
#check each concentration, find concentrations that have sig RAIU but no sig cytotoxicity.
#get the median response for each chemical on each concentration
```

```
median_responses <- dt_mc_norm %>%
  filter(wllt == "t") %>%
  group_by(spид, conc, assay) %>%
  summarize(med = median(nval_median)) %>% ungroup
```

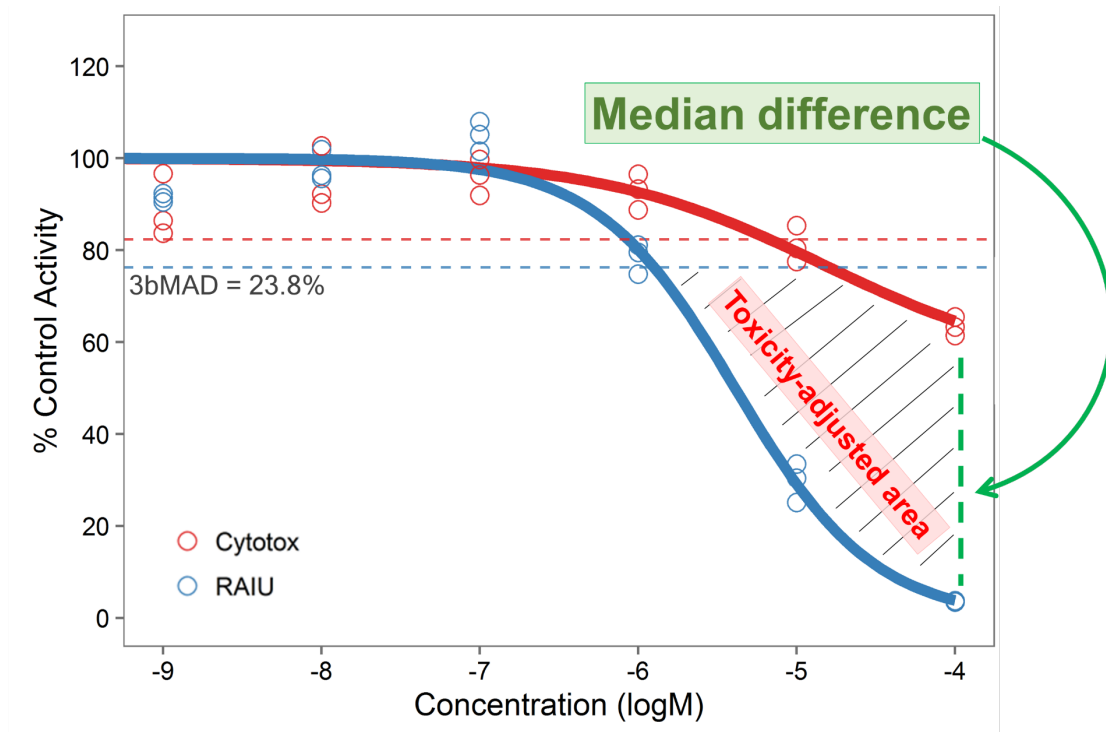

Figure 1: Demonstration of TAA and Median-Difference

```

cyto_positives <- median_responses %>%
  filter(assay == 'Cytotox') %>%
  mutate(positive_cyto = ifelse((med < 100 - sig_mc[[1,3]]), 1, 0))
raiu_positives <- median_responses %>%
  filter(assay == 'RAIU') %>%
  mutate(positive_raiu = ifelse((med < 100 - sig_mc[[2,3]]), 1, 0))

raiu_1_cyto_0 <- left_join(cyto_positives, raiu_positives, by = c("spid", "conc")) %>%
  mutate(separation = ifelse((positive_raiu == 1 & positive_cyto == 0), 1, 0))

separation_spid <- raiu_1_cyto_0 %>%
  filter(separation == 1) %>%
  select(spid) %>%
  unique %>%
  mutate(sep = "Yes")

sum_tbl5 <- left_join(sum_tbl, separation_spid, by = "spid") %>%
  mutate(sep = ifelse(is.na(sep), "No", "Yes")) %>%
  filter(!is.na(taa_norm))
sum_tbl6 <- left_join(sum_tbl, separation_spid, by = "spid") %>%
  mutate(sep = ifelse(is.na(sep), "-", "+")) %>%
  filter(!is.na(taa_norm))
write.csv(sum_tbl6, "./output data files/sum_tble_for_paper_new_ranking_add_separation.csv")

rs_plot2 <- ggplot(sum_tbl5) +
  geom_col(aes(x=reorder(spид, ranking_score), y = ranking_score, fill = sep),

```

```

    alpha = 0.9, linetype = "solid") +
  theme_light(base_size = 14) +
  xlab("Chemicals, ordered by ranking scores") +
  ylab("Ranking Score") +
  geom_hline(yintercept = 200, alpha = 0.8, size = 0.8,
            linetype = "dashed", color = "gray32") +
  theme(axis.text.y = element_blank(),
        axis.ticks.y = element_blank()) +
  scale_fill_manual(name = "",
                   values = c("gray20", "#21B321"),
                   breaks = c("", "Yes"),
                   labels = c("No", "Non-cytotoxic RAIU inhibition\nat 1 or 2 concentrations")
  )+
  theme(legend.justification = c(0,1), legend.position = c(0.28, 0.18),
        legend.title = element_text(size = rel(0.7)),
        legend.text = element_text(size = rel(0.6)),
        legend.background = element_blank()) +
  coord_flip() +
  scale_x_discrete(breaks = NULL) +
  scale_y_continuous(breaks = seq(-25, 200, by = 25))

```

rs\_plot2

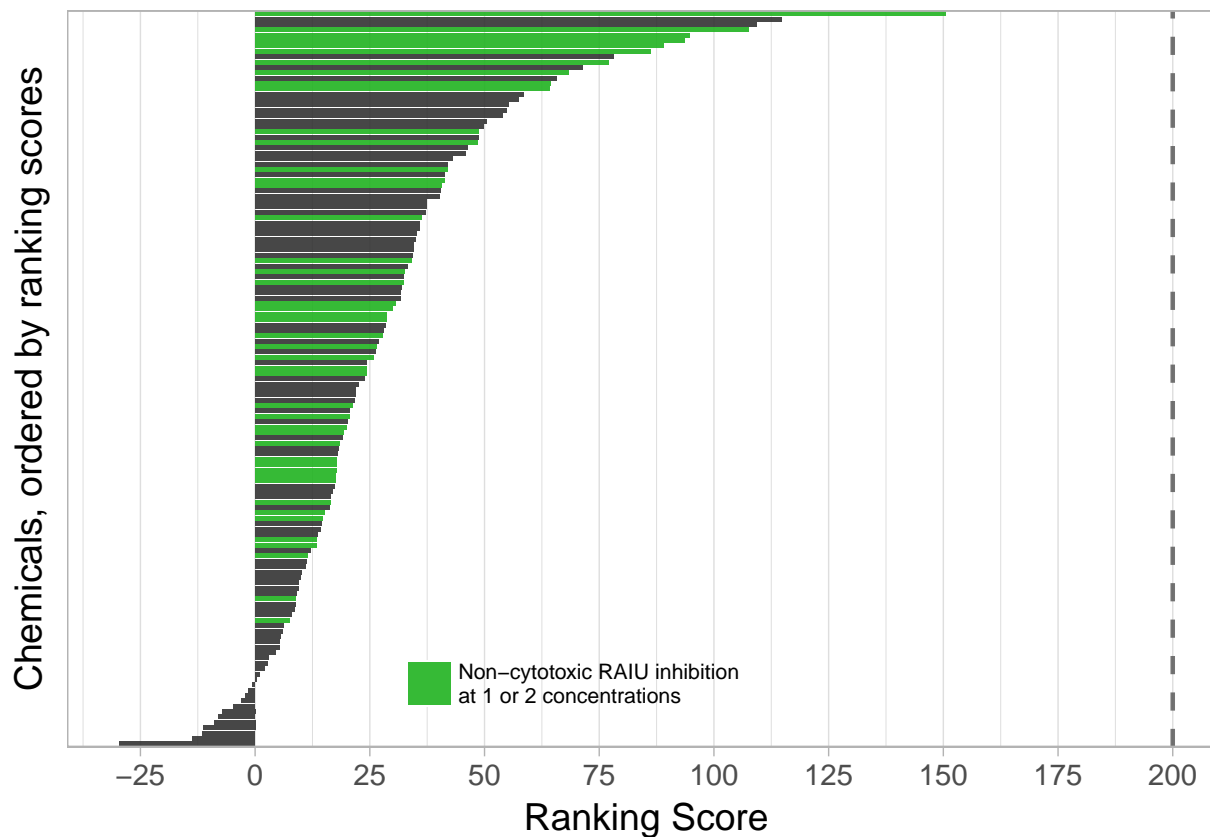

## Results Table for publication

Table S1

```

multi_results <- sum_tbl %>%
  dplyr::select(spид, chnm, casn, AC50_prim, absEC50_prim, cyto_lim, ranking_score)

## merge sum-tbl with spид_chnm_table, to include all single and multi-con results
spид_chnm_table <-
read_excel("./raw data files/EPA_11700_EPA-SLaws_ph1v2_150ul_20170125_key.xlsx")
#rename the column title to be compatible with tcpl package.

spид_chnm_table <-
  spид_chnm_table %>%
  dplyr::select(EPA_Sample_ID, Aliquot_Concentration, CASRN, Preferred_Name)
names(spид_chnm_table) <- c("spид", "aliquot_conc", "casn", "chnm")
#calculate the actual concentration tested in single-con screening
#the unit will be convert from mM to Molar
spид_chnm_table <- spид_chnm_table %>%
  mutate(test_conc = aliquot_conc / 2E5)
single_con_results <- spид_chnm_table %>%
  mutate(hitc = ifelse(spид %in% ls169$spид, "+", "-"))

final_sum_tbl <- full_join(single_con_results, multi_results,
  by = c("spид", "chnm", "casn")) %>%
  dplyr::select(spид, chnm, casn, test_conc, hitc, everything()) %>%
  dplyr::select(-aliquot_conc) %>%
  arrange(desc(ranking_score), desc(hitc))

colnames(final_sum_tbl) <- c("SPID", "Chemical", "CAS NO.", "Max Conc(M)",
  "Tested in Multi-Conc", "AC50", "absEC50",
  "Cytotox Point", "Ranking Score")
knitr::kable(final_sum_tbl, caption = "List of chemicals and screening results" )

```

Table 10: List of chemicals and screening results

| SPID         | Chemical                             | CAS NO.     | Max Conc(M) | T |
|--------------|--------------------------------------|-------------|-------------|---|
| TP0001500G04 | Etoxazole                            | 153233-91-1 | 1.0e-04     | + |
| TP0001502E10 | Triphenyltin hydroxide               | 76-87-9     | 1.0e-04     | + |
| TP0001501D03 | Niclosamide                          | 50-65-7     | 5.0e-05     | + |
| TP0001502G01 | 3-Iodo-2-propynyl-N-butylcarbamate   | 55406-53-6  | 1.0e-04     | + |
| TP0001501E07 | PFOS                                 | 1763-23-1   | 8.0e-05     | + |
| TP0001498G01 | PFOS                                 | 1763-23-1   | 8.0e-05     | + |
| TP0001498B02 | Cyprodinil                           | 121552-61-2 | 1.0e-04     | + |
| TP0001501G03 | Rotenone                             | 83-79-4     | 1.0e-04     | + |
| TP0001501C09 | Pyridaben                            | 96489-71-3  | 1.0e-04     | + |
| TP0001500E11 | Methoxyfenozide                      | 161050-58-4 | 1.0e-04     | + |
| TP0001500E05 | 2-(Thiocyanomethylthio)benzothiazole | 21564-17-0  | 1.0e-04     | + |
| TP0001500D09 | Oxyfluorfen                          | 42874-03-3  | 1.0e-04     | + |
| TP0001499D08 | Captan                               | 133-06-2    | 9.5e-05     | + |
| TP0001502F03 | Fipronil                             | 120068-37-3 | 1.0e-04     | + |
| TP0001502E07 | Fluroxypyr-meptyl                    | 81406-37-3  | 1.0e-04     | + |
| TP0001500D03 | Cyhalofop-butyl                      | 122008-85-9 | 9.5e-05     | + |



| SPID         | Chemical                   | CAS NO.     | Max Conc(M) | T |
|--------------|----------------------------|-------------|-------------|---|
| TP0001499A01 | Fenpyroximate (Z,E)        | 111812-58-9 | 1.0e-04     | + |
| TP0001498C01 | Thiobencarb                | 28249-77-6  | 1.0e-04     | + |
| TP0001500E07 | Emamectin benzoate         | 155569-91-8 | 1.0e-04     | + |
| TP0001499C08 | Diphenylamine              | 122-39-4    | 1.0e-04     | + |
| TP0001499G03 | Folpet                     | 133-07-3    | 1.0e-04     | + |
| TP0001499B03 | Endosulfan                 | 115-29-7    | 1.0e-04     | + |
| TP0001498C04 | Prometryn                  | 7287-19-6   | 1.0e-04     | + |
| TP0001502F02 | Zoxamide                   | 156052-68-5 | 1.0e-04     | + |
| TP0001499E01 | Cyazofamid                 | 120116-88-3 | 1.0e-04     | + |
| TP0001501E01 | Parathion                  | 56-38-2     | 1.0e-04     | + |
| TP0001498F01 | Fenthion                   | 55-38-9     | 1.0e-04     | + |
| TP0001499G11 | Mancozeb                   | 8018-01-7   | 5.0e-05     | + |
| TP0001502F04 | Bifenazate                 | 149877-41-8 | 1.0e-04     | + |
| TP0001502F09 | Clorophene                 | 120-32-1    | 1.0e-04     | + |
| TP0001499F10 | Trifloxystrobin            | 141517-21-7 | 1.0e-04     | + |
| TP0001500D07 | Triclosan                  | 3380-34-5   | 1.0e-04     | + |
| TP0001502B03 | Methoxychlor               | 72-43-5     | 9.5e-05     | + |
| TP0001499F01 | Quinoxifen                 | 124495-18-7 | 1.0e-04     | + |
| TP0001499G01 | Triflumizole               | 68694-11-1  | 1.0e-04     | + |
| TP0001501E11 | Prallethrin                | 23031-36-9  | 9.5e-05     | + |
| TP0001499C01 | S-Bioallethrin             | 28434-00-6  | 1.0e-04     | + |
| TP0001502B10 | Coumaphos                  | 56-72-4     | 1.0e-04     | + |
| TP0001502F07 | Chlorpyrifos-methyl        | 5598-13-0   | 1.0e-04     | + |
| TP0001498D10 | Fluoxastrobin              | 361377-29-9 | 1.0e-04     | + |
| TP0001501C11 | Triclosan                  | 3380-34-5   | 1.0e-04     | + |
| TP0001498H12 | Pyraclostrobin             | 175013-18-0 | 1.0e-04     | + |
| TP0001502G11 | Fenoxaprop-ethyl           | 66441-23-4  | 1.0e-04     | + |
| TP0001501D10 | Fenoxycarb                 | 72490-01-8  | 1.0e-04     | + |
| TP0001500G01 | Hexaconazole               | 79983-71-4  | 1.0e-04     | + |
| TP0001499E10 | Diclosulam                 | 145701-21-9 | 1.0e-04     | + |
| TP0001499D01 | Clorophene                 | 120-32-1    | 1.0e-04     | + |
| TP0001498D08 | Tebupirimfos               | 96182-53-5  | 1.0e-04     | + |
| TP0001501C02 | Abamectin                  | 71751-41-2  | 1.0e-04     | + |
| TP0001500E08 | Pyriproxyfen               | 95737-68-1  | 1.0e-04     | + |
| TP0001498B11 | Triclosan                  | 3380-34-5   | 1.0e-04     | + |
| TP0001502C11 | Carfentrazone-ethyl        | 128639-02-1 | 1.0e-04     | + |
| TP0001498A01 | Pirimiphos-methyl          | 29232-93-7  | 1.0e-04     | + |
| TP0001502G02 | Dibutyl phthalate          | 84-74-2     | 1.0e-04     | + |
| TP0001498C09 | Methylene bis(thiocyanate) | 6317-18-6   | 1.0e-04     | + |
| TP0001502D03 | Bisphenol A                | 80-05-7     | 1.0e-04     | + |
| TP0001498B08 | Dithiopyr                  | 97886-45-8  | 9.5e-05     | + |
| TP0001500D05 | Tebufenpyrad               | 119168-77-3 | 1.0e-04     | + |
| TP0001502D04 | Diclofop-methyl            | 51338-27-3  | 1.0e-04     | + |
| TP0001500G11 | Dibutyl phthalate          | 84-74-2     | 1.0e-04     | + |
| TP0001498G03 | Lactofen                   | 77501-63-4  | 1.0e-04     | + |
| TP0001500C09 | Piperonyl butoxide         | 51-03-6     | 1.0e-04     | + |
| TP0001500B08 | Buprofezin                 | 69327-76-0  | 1.0e-04     | + |
| TP0001502G03 | Cloprop                    | 101-10-0    | 1.0e-04     | + |
| TP0001498C10 | Flutolanil                 | 66332-96-5  | 1.0e-04     | + |
| TP0001500G03 | Cinmethylin                | 87818-31-3  | 1.0e-04     | + |
| TP0001502D09 | Chlorpropham               | 101-21-3    | 1.0e-04     | + |
| TP0001499C09 | Clodinafop-propargyl       | 105512-06-9 | 1.0e-04     | + |

| SPID         | Chemical                                       | CAS NO.     | Max Conc(M) | T |
|--------------|------------------------------------------------|-------------|-------------|---|
| TP0001501G11 | Phosalone                                      | 2310-17-0   | 1.0e-04     | + |
| TP0001502F05 | Allethrin                                      | 584-79-2    | 1.0e-04     | + |
| TP0001501G10 | Disulfoton                                     | 298-04-4    | 1.0e-04     | + |
| TP0001502B05 | Flumiclorac-pentyl                             | 87546-18-7  | 1.0e-04     | + |
| TP0001502D11 | Forchlorfenuron                                | 68157-60-8  | 1.0e-04     | + |
| TP0001500F07 | Flumetralin                                    | 62924-70-3  | 1.0e-04     | + |
| TP0001501E03 | Ethalfuralin                                   | 55283-68-6  | 1.0e-04     | + |
| TP0001500B09 | Lindane                                        | 58-89-9     | 1.0e-04     | + |
| TP0001500G08 | Fluazinam                                      | 79622-59-6  | 9.0e-05     | + |
| TP0001501D02 | Cyfluthrin                                     | 68359-37-5  | 1.0e-04     | + |
| TP0001499D02 | Tri-allate                                     | 2303-17-5   | 1.0e-04     | + |
| TP0001502G07 | Imazalil                                       | 35554-44-0  | 1.0e-04     | + |
| TP0001502E08 | Cypermethrin                                   | 52315-07-8  | 1.0e-04     | + |
| TP0001500F09 | Amitraz                                        | 33089-61-1  | 1.0e-04     | + |
| TP0001499E11 | Tetraconazole                                  | 112281-77-3 | 9.5e-05     | + |
| TP0001502C07 | Thiazopyr                                      | 117718-60-2 | 1.0e-04     | + |
| TP0001502E02 | Trifluralin                                    | 1582-09-8   | 1.0e-04     | + |
| TP0001500F11 | Tebufenozide                                   | 112410-23-8 | 1.0e-04     | + |
| TP0001502B07 | Azoxystrobin                                   | 131860-33-8 | 1.0e-04     | + |
| TP0001501B01 | Mancozeb                                       | 8018-01-7   | 5.0e-05     | + |
| TP0001500F01 | Fluazifop-butyl                                | 69806-50-4  | 1.0e-04     | + |
| TP0001502F10 | Fenarimol                                      | 60168-88-9  | 1.0e-04     | + |
| TP0001499B11 | Allethrin                                      | 584-79-2    | 1.0e-04     | + |
| TP0001498E08 | Maneb                                          | 12427-38-2  | 1.0e-04     | + |
| TP0001498D07 | Flusilazole                                    | 85509-19-9  | 1.0e-04     | + |
| TP0001499B01 | Bisphenol A                                    | 80-05-7     | 1.0e-04     | + |
| TP0001498G05 | Ametryn                                        | 834-12-8    | 1.0e-04     | + |
| TP0001499G10 | Fluazifop-P-butyl                              | 79241-46-6  | 1.0e-04     | + |
| TP0001500E10 | Diniconazole                                   | 83657-24-3  | 1.0e-04     | + |
| TP0001501G09 | Pendimethalin                                  | 40487-42-1  | 1.0e-04     | + |
| TP0001501F07 | Fenitrothion                                   | 122-14-5    | 1.0e-04     | + |
| TP0001502B04 | Isazofos                                       | 42509-80-8  | 1.0e-04     | + |
| TP0001502B01 | Oxadiazon                                      | 19666-30-9  | 1.0e-04     | + |
| TP0001498D11 | Hexythiazox                                    | 78587-05-0  | 1.0e-04     | + |
| TP0001500E09 | Fenamidone                                     | 161326-34-7 | 1.0e-04     | + |
| TP0001498F05 | Difenoconazole                                 | 119446-68-3 | 1.0e-04     | + |
| TP0001501F01 | Azoxystrobin                                   | 131860-33-8 | 1.0e-04     | + |
| TP0001502C04 | Fluthiacet-methyl                              | 117337-19-6 | 1.0e-04     | + |
| TP0001498E01 | Oryzalin                                       | 19044-88-3  | 1.0e-04     | + |
| TP0001501E05 | Thidiazuron                                    | 51707-55-2  | 1.0e-04     | + |
| TP0001500B05 | Famoxadone                                     | 131807-57-3 | 1.0e-04     | + |
| TP0001502E04 | Dicofol                                        | 115-32-2    | 1.0e-04     | + |
| TP0001500F02 | Propargite                                     | 2312-35-8   | 1.0e-04     | + |
| TP0001501E02 | 2,2-Bis(4-hydroxyphenyl)-1,1,1-trichloroethane | 2971-36-0   | 1.0e-04     | + |
| TP0001502G09 | Propiconazole                                  | 60207-90-1  | 1.0e-04     | + |
| TP0001498E11 | Chlorethoxyfos                                 | 54593-83-8  | 1.0e-04     | + |
| TP0001502G04 | Thiodicarb                                     | 59669-26-0  | 1.0e-04     | + |
| TP0001500D04 | Ethofumesate                                   | 26225-79-6  | 1.0e-04     | + |
| TP0001498F07 | Bensulide                                      | 741-58-2    | 1.0e-04     | + |
| TP0001500G09 | Prodiamine                                     | 29091-21-2  | 1.0e-04     | + |
| TP0001501D04 | Bensulide                                      | 741-58-2    | 1.0e-04     | + |
| TP0001500C04 | Bisphenol A                                    | 80-05-7     | 1.0e-04     | + |

| SPID         | Chemical                                                     | CAS NO.     | Max Conc(M) | T |
|--------------|--------------------------------------------------------------|-------------|-------------|---|
| TP0001500G05 | Flumioxazin                                                  | 103361-09-7 | 1.0e-04     | + |
| TP0001502A01 | Methidathion                                                 | 950-37-8    | 1.0e-04     | + |
| TP0001498B05 | Azoxystrobin                                                 | 131860-33-8 | 1.0e-04     | + |
| TP0001498B09 | Butralin                                                     | 33629-47-9  | 1.0e-04     | + |
| TP0001498D01 | Dicloran                                                     | 99-30-9     | 1.0e-04     | + |
| TP0001500D11 | Oryzalin                                                     | 19044-88-3  | 1.0e-04     | + |
| TP0001501B10 | Fenbuconazole                                                | 114369-43-6 | 1.0e-04     | + |
| TP0001499E09 | Thiram                                                       | 137-26-8    | 1.0e-04     | + |
| TP0001500B02 | Tetramethrin                                                 | 7696-12-0   | 1.0e-04     | + |
| TP0001498D05 | Profenofos                                                   | 41198-08-7  | 5.0e-05     | + |
| TP0001501D01 | Quizalofop-ethyl                                             | 76578-14-8  | 8.5e-05     | + |
| TP0001498D03 | Prochloraz                                                   | 67747-09-5  | 1.0e-04     | + |
| TP0001501C04 | Milbemectin (mixture of 70% Milbemcin A4, 30% Milbemycin A3) | NOCAS_34742 | 9.5e-05     | + |
| TP0001498B07 | Captafol                                                     | 2425-06-1   | 1.0e-04     | + |
| TP0001499G02 | Tribufos                                                     | 78-48-8     | 1.0e-04     | + |
| TP0001499C07 | Benfluralin                                                  | 1861-40-1   | 1.0e-04     | + |
| TP0001500E01 | MGK-264                                                      | 113-48-4    | 1.0e-04     | + |
| TP0001498D02 | Chlorothalonil                                               | 1897-45-6   | 1.0e-04     | + |
| TP0001498G02 | Propanil                                                     | 709-98-8    | 1.0e-04     | + |
| TP0001498C03 | Bromoxynil                                                   | 1689-84-5   | 8.0e-05     | + |
| TP0001498F03 | Napropamide                                                  | 15299-99-7  | 1.0e-04     | + |
| TP0001498E04 | Nitrapyrin                                                   | 1929-82-4   | 1.0e-04     | + |
| TP0001498G08 | Propetamphos                                                 | 31218-83-4  | 1.0e-04     | + |
| TP0001498G09 | Myclobutanil                                                 | 88671-89-0  | 1.0e-04     | + |
| TP0001498C11 | Malathion                                                    | 121-75-5    | 1.0e-04     | + |
| TP0001499E02 | Resmethrin                                                   | 10453-86-8  | 1.0e-04     | + |
| TP0001499E03 | Fenpropathrin                                                | 39515-41-8  | 1.0e-04     | + |
| TP0001499B05 | Picloram                                                     | 1918-02-1   | 1.0e-04     | + |
| TP0001499B07 | Fludioxonil                                                  | 131341-86-1 | 1.0e-04     | + |
| TP0001500A01 | Acibenzolar-S-methyl                                         | 135158-54-2 | 1.0e-04     | + |
| TP0001500G02 | Azinphos-methyl                                              | 86-50-0     | 1.0e-04     | + |
| TP0001500F03 | Mancozeb                                                     | 8018-01-7   | 5.0e-05     | + |
| TP0001500F04 | Boscalid                                                     | 188425-85-6 | 1.0e-04     | + |
| TP0001500C05 | Butachlor                                                    | 23184-66-9  | 1.0e-04     | + |
| TP0001500B07 | Tefluthrin                                                   | 79538-32-2  | 1.0e-04     | + |
| TP0001500G07 | Butafenacil                                                  | 134605-64-4 | 1.0e-04     | + |
| TP0001501A01 | Tralkoxydim                                                  | 87820-88-0  | 1.0e-04     | + |
| TP0001501C01 | Pyraflufen-ethyl                                             | 129630-19-9 | 1.0e-04     | + |
| TP0001501G02 | Prometon                                                     | 1610-18-0   | 1.0e-04     | + |
| TP0001501C03 | Vinclozolin                                                  | 50471-44-8  | 1.0e-04     | + |
| TP0001501F04 | 2-Phenylphenol                                               | 90-43-7     | 1.0e-04     | + |
| TP0001501G04 | Clomazone                                                    | 81777-89-1  | 1.0e-04     | + |
| TP0001501B05 | Flufenpyr-ethyl                                              | 188489-07-8 | 1.0e-04     | + |
| TP0001501D05 | Chlorpyrifos oxon                                            | 5598-15-2   | 9.5e-05     | + |
| TP0001501B08 | Fenhexamid                                                   | 126833-17-8 | 1.0e-04     | + |
| TP0001501B11 | Cycloate                                                     | 1134-23-2   | 1.0e-04     | + |
| TP0001502E01 | Naled                                                        | 300-76-5    | 1.0e-04     | + |
| TP0001502E03 | Linuron                                                      | 330-55-2    | 1.0e-04     | + |
| TP0001502C09 | EPTC                                                         | 759-94-4    | 1.0e-04     | + |
| TP0001498B01 | Bifenthrin                                                   | 82657-04-3  | 1.0e-04     | - |
| TP0001498C02 | Bentazone                                                    | 25057-89-0  | 1.0e-04     | - |
| TP0001498E02 | Mesotrione                                                   | 104206-82-8 | 1.0e-04     | - |

| SPID         | Chemical                       | CAS NO.     | Max Conc(M) | T |
|--------------|--------------------------------|-------------|-------------|---|
| TP0001498F02 | Esfenvalerate                  | 66230-04-4  | 1.0e-04     | - |
| TP0001498B03 | Thiophanate-methyl             | 23564-05-8  | 1.0e-04     | - |
| TP0001498E03 | Trichlorfon                    | 52-68-6     | 1.0e-04     | - |
| TP0001498B04 | Carbaryl                       | 63-25-2     | 1.0e-04     | - |
| TP0001498D04 | 2,4-Dichlorophenoxyacetic acid | 94-75-7     | 1.0e-04     | - |
| TP0001498F04 | Boric acid                     | 10043-35-3  | 1.0e-04     | - |
| TP0001498G04 | Dichlorprop                    | 120-36-5    | 1.0e-04     | - |
| TP0001498C05 | Dicrotophos                    | 141-66-2    | 1.0e-04     | - |
| TP0001498E05 | Butylate                       | 2008-41-5   | 1.0e-04     | - |
| TP0001498C07 | Dimethylarsinic acid           | 75-60-5     | 1.0e-04     | - |
| TP0001498E07 | Dichlorvos                     | 62-73-7     | 5.0e-05     | - |
| TP0001498G07 | Malaoxon                       | 1634-78-2   | 1.0e-04     | - |
| TP0001498C08 | Cyanazine                      | 21725-46-2  | 1.0e-04     | - |
| TP0001498F08 | Methomyl                       | 16752-77-5  | 1.0e-04     | - |
| TP0001498D09 | PFOA                           | 335-67-1    | 1.0e-04     | - |
| TP0001498E09 | Propoxur                       | 114-26-1    | 1.0e-04     | - |
| TP0001498F09 | Imazethapyr                    | 81335-77-5  | 1.0e-04     | - |
| TP0001498B10 | Imidacloprid                   | 138261-41-3 | 1.0e-04     | - |
| TP0001498E10 | Fenamiphos                     | 22224-92-6  | 1.0e-04     | - |
| TP0001498F10 | Clopyralid                     | 1702-17-6   | 1.0e-04     | - |
| TP0001498G10 | Metalaxyl                      | 57837-19-1  | 1.0e-04     | - |
| TP0001498F11 | Monocrotophos                  | 6923-22-4   | 1.0e-04     | - |
| TP0001498G11 | Indoxacarb                     | 173584-44-6 | 8.0e-05     | - |
| TP0001499B02 | Acephate                       | 30560-19-1  | 1.0e-04     | - |
| TP0001499C02 | Anilazine                      | 101-05-3    | 1.0e-04     | - |
| TP0001499F02 | Diuron                         | 330-54-1    | 1.0e-04     | - |
| TP0001499C03 | Clofentezine                   | 74115-24-5  | 1.0e-04     | - |
| TP0001499D03 | Methamidophos                  | 10265-92-6  | 1.0e-04     | - |
| TP0001499F03 | Thiamethoxam                   | 153719-23-4 | 1.0e-04     | - |
| TP0001499B04 | Formetanate hydrochloride      | 23422-53-9  | 1.0e-04     | - |
| TP0001499C04 | Fluometuron                    | 2164-17-2   | 1.0e-04     | - |
| TP0001499D04 | Difenzoquat metilsulfate       | 43222-48-6  | 1.0e-04     | - |
| TP0001499E04 | Bendiocarb                     | 22781-23-3  | 1.0e-04     | - |
| TP0001499F04 | Alachlor                       | 15972-60-8  | 1.0e-04     | - |
| TP0001499G04 | Dimethenamid                   | 87674-68-8  | 1.0e-04     | - |
| TP0001499C05 | 2,4-Dichlorophenoxyacetic acid | 94-75-7     | 1.0e-04     | - |
| TP0001499D05 | Ethylene thiourea              | 96-45-7     | 1.0e-04     | - |
| TP0001499E05 | Azamethiphos                   | 35575-96-3  | 1.0e-04     | - |
| TP0001499F05 | Dazomet                        | 533-74-4    | 1.0e-04     | - |
| TP0001499G05 | Pyrimethanil                   | 53112-28-0  | 1.0e-04     | - |
| TP0001499D07 | Propyzamide                    | 23950-58-5  | 1.0e-04     | - |
| TP0001499E07 | Triadimenol                    | 55219-65-3  | 1.0e-04     | - |
| TP0001499F07 | Pirimicarb                     | 23103-98-2  | 1.0e-04     | - |
| TP0001499G07 | Isoxaben                       | 82558-50-7  | 1.0e-04     | - |
| TP0001499B08 | Acetochlor                     | 34256-82-1  | 1.0e-04     | - |
| TP0001499E08 | Acifluorfen                    | 50594-66-6  | 1.0e-04     | - |
| TP0001499F08 | Tepraloxydim                   | 149979-41-9 | 1.0e-04     | - |
| TP0001499G08 | Clopyralid-olamine             | 57754-85-5  | 1.0e-04     | - |
| TP0001499B09 | 2,4-DB                         | 94-82-6     | 1.0e-04     | - |
| TP0001499D09 | Hexazinone                     | 51235-04-2  | 1.0e-04     | - |
| TP0001499F09 | Tebuthiuron                    | 34014-18-1  | 1.0e-04     | - |
| TP0001499G09 | Iprodione                      | 36734-19-7  | 1.0e-04     | - |

| SPID         | Chemical                           | CAS NO.     | Max Conc(M) | T |
|--------------|------------------------------------|-------------|-------------|---|
| TP0001499B10 | Dicamba                            | 1918-00-9   | 1.0e-04     | - |
| TP0001499C10 | Methyl parathion                   | 298-00-0    | 1.0e-04     | - |
| TP0001499D10 | Fluroxypyr                         | 69377-81-7  | 1.0e-04     | - |
| TP0001499C11 | Dimethomorph                       | 110488-70-5 | 1.0e-04     | - |
| TP0001499D11 | Benomyl                            | 17804-35-2  | 1.0e-04     | - |
| TP0001499F11 | Monomethyl phthalate               | 4376-18-5   | 1.0e-04     | - |
| TP0001499H12 | Diazinon                           | 333-41-5    | 1.0e-04     | - |
| TP0001500B01 | Cyclanilide                        | 113136-77-9 | 1.0e-04     | - |
| TP0001500C01 | Cyanamide                          | 420-04-2    | 1.0e-04     | - |
| TP0001500D01 | Ethoprop                           | 13194-48-4  | 1.0e-04     | - |
| TP0001500C02 | Penoxsulam                         | 219714-96-2 | 1.0e-04     | - |
| TP0001500D02 | Clothianidin                       | 210880-92-5 | 1.0e-04     | - |
| TP0001500E02 | Di(2-ethylhexyl) phthalate         | 117-81-7    | 1.0e-04     | - |
| TP0001500B03 | Acetamiprid                        | 135410-20-7 | 1.0e-04     | - |
| TP0001500C03 | Novaluron                          | 116714-46-6 | 1.0e-04     | - |
| TP0001500E03 | Isoxaflutole                       | 141112-29-0 | 1.0e-04     | - |
| TP0001500B04 | Imazamox                           | 114311-32-9 | 1.0e-04     | - |
| TP0001500E04 | Sulfentrazone                      | 122836-35-5 | 1.0e-04     | - |
| TP0001500F05 | Cyproconazole                      | 94361-06-5  | 9.5e-05     | - |
| TP0001500C07 | Pymetrozine                        | 123312-89-0 | 1.0e-04     | - |
| TP0001500C08 | Spiroxamine                        | 118134-30-8 | 1.0e-04     | - |
| TP0001500D08 | Quinclorac                         | 84087-01-4  | 1.0e-04     | - |
| TP0001500F08 | Triclopyr                          | 55335-06-3  | 1.0e-04     | - |
| TP0001500B10 | Propamocarb hydrochloride          | 25606-41-1  | 1.0e-04     | - |
| TP0001500C10 | Monobutyl phthalate                | 131-70-4    | 1.0e-04     | - |
| TP0001500D10 | Pentachloronitrobenzene            | 82-68-8     | 1.0e-04     | - |
| TP0001500F10 | Flufenacet                         | 142459-58-3 | 1.0e-04     | - |
| TP0001500G10 | Imazapyr                           | 81334-34-1  | 1.0e-04     | - |
| TP0001500B11 | Trifloxysulfuron-sodium            | 199119-58-9 | 1.0e-04     | - |
| TP0001500C11 | Propazine                          | 139-40-2    | 1.0e-04     | - |
| TP0001500H12 | Thiacloprid                        | 111988-49-9 | 1.0e-04     | - |
| TP0001501G01 | 2-Methoxyethanol                   | 109-86-4    | 1.0e-04     | - |
| TP0001501B02 | Chloridazon                        | 1698-60-8   | 1.0e-04     | - |
| TP0001501F02 | Asulam                             | 3337-71-1   | 1.0e-04     | - |
| TP0001501B03 | Pyriithiobac-sodium                | 123343-16-8 | 1.0e-04     | - |
| TP0001501F03 | Deisopropylatrazine                | 1007-28-9   | 1.0e-04     | - |
| TP0001501B04 | Molinate                           | 2212-67-1   | 1.0e-04     | - |
| TP0001501E04 | Oxytetracycline dihydrate          | 6153-64-6   | 1.0e-04     | - |
| TP0001501C05 | Spirodiclofen                      | 148477-71-8 | 1.0e-04     | - |
| TP0001501F05 | Carboxin                           | 5234-68-4   | 1.0e-04     | - |
| TP0001501G05 | Oxamyl                             | 23135-22-0  | 1.0e-04     | - |
| TP0001501B07 | Symclosene                         | 87-90-1     | 1.0e-04     | - |
| TP0001501C07 | Fosthiazate                        | 98886-44-3  | 1.0e-04     | - |
| TP0001501D07 | Sethoxydim                         | 74051-80-2  | 1.0e-04     | - |
| TP0001501G07 | Dimethoate                         | 60-51-5     | 1.0e-04     | - |
| TP0001501C08 | MCPA                               | 94-74-6     | 1.0e-04     | - |
| TP0001501D08 | Paclobutrazol                      | 76738-62-0  | 1.0e-04     | - |
| TP0001501E08 | Dipropyl 2,5-pyridinedicarboxylate | 136-45-8    | 1.0e-04     | - |
| TP0001501F08 | Methyl isothiocyanate              | 556-61-6    | 1.0e-04     | - |
| TP0001501G08 | DEET                               | 134-62-3    | 1.0e-04     | - |
| TP0001501B09 | Cyromazine                         | 66215-27-8  | 1.0e-04     | - |
| TP0001501D09 | Imazaquin                          | 81335-37-7  | 1.0e-04     | - |

| SPID         | Chemical                       | CAS NO.     | Max Conc(M) | T |
|--------------|--------------------------------|-------------|-------------|---|
| TP0001501E09 | Metribuzin                     | 21087-64-9  | 1.0e-04     | - |
| TP0001501F09 | Flumetsulam                    | 98967-40-9  | 1.0e-04     | - |
| TP0001501C10 | Triadimefon                    | 43121-43-3  | 1.0e-04     | - |
| TP0001501E10 | Metolachlor                    | 51218-45-2  | 1.0e-04     | - |
| TP0001501F10 | Permethrin                     | 52645-53-1  | 1.0e-04     | - |
| TP0001501D11 | Terbacil                       | 5902-51-2   | 1.0e-04     | - |
| TP0001501F11 | Triadimenol                    | 55219-65-3  | 1.0e-04     | - |
| TP0001501H12 | Etridiazole                    | 2593-15-9   | 1.0e-04     | - |
| TP0001502C01 | Propoxycarbazone-sodium        | 181274-15-7 | 1.0e-04     | - |
| TP0001502D01 | Mevinphos                      | 7786-34-7   | 1.0e-04     | - |
| TP0001502F01 | Bromacil                       | 314-40-9    | 1.0e-04     | - |
| TP0001502B02 | Metam-sodium hydrate           | 6734-80-1   | 1.0e-04     | - |
| TP0001502C02 | 2,4-Dichlorophenoxyacetic acid | 94-75-7     | 1.0e-04     | - |
| TP0001502D02 | Thiabendazole                  | 148-79-8    | 1.0e-04     | - |
| TP0001502C03 | Atrazine                       | 1912-24-9   | 1.0e-04     | - |
| TP0001502C05 | 2-Phenoxyethanol               | 122-99-6    | 1.0e-04     | - |
| TP0001502D05 | Icaridin                       | 119515-38-7 | 1.0e-04     | - |
| TP0001502E05 | Imazapic                       | 104098-48-8 | 1.0e-04     | - |
| TP0001502G05 | Aldicarb                       | 116-06-3    | 1.0e-04     | - |
| TP0001502D07 | Triticonazole                  | 131983-72-7 | 9.5e-05     | - |
| TP0001502B08 | Diazoxon                       | 962-58-3    | 1.0e-04     | - |
| TP0001502C08 | Maleic hydrazide               | 123-33-1    | 1.0e-04     | - |
| TP0001502D08 | Daminozide                     | 1596-84-5   | 1.0e-04     | - |
| TP0001502F08 | Mepiquat chloride              | 24307-26-4  | 1.0e-04     | - |
| TP0001502G08 | Norflurazon                    | 27314-13-2  | 1.0e-04     | - |
| TP0001502B09 | Chloroneb                      | 2675-77-6   | 1.0e-04     | - |
| TP0001502E09 | Ethephon                       | 16672-87-0  | 1.0e-04     | - |
| TP0001502C10 | Iodosulfuron-methyl-sodium     | 144550-36-7 | 1.0e-04     | - |
| TP0001502D10 | Simazine                       | 122-34-9    | 1.0e-04     | - |
| TP0001502G10 | MEHP                           | 4376-20-9   | 1.0e-04     | - |
| TP0001502B11 | Cymoxanil                      | 57966-95-7  | 1.0e-04     | - |
| TP0001502E11 | Diquat dibromide monohydrate   | 6385-62-2   | 5.0e-05     | - |
| TP0001502F11 | Dimethyl phthalate             | 131-11-3    | 1.0e-04     | - |
| TP0001502H12 | Dichlobenil                    | 1194-65-6   | 1.0e-04     | - |

Export supplemental summary table that includes all potency metrics.

```

sup_sum_tbl <- full_join(single_con_results, sum_tbl, by = c("spid", "chnm", "casn")) %>%
  dplyr::select(spid, chnm, casn, test_conc, hitc, everything()) %>%
  dplyr::select(-aliquot_conc, -index) %>%
  arrange(desc(ranking_score), desc(hitc))

colnames(sup_sum_tbl) <- c("Sample ID", "Chemical", "CAS NO.", "Max Conc(M)",
  "Hit Call", "TAA", "Median_Difference", "AC50_Cytotox",
  "AC50_RAIU", "absEC80_Cytotox", "absEC50_Cytotox",
  "absEC80_RAIU", "absEC50_RAIU", "Cytotox_point",
  "TAA_Normalized", "Median_Difference_Normalized",
  "Ranking Score")

#write_csv(sup_sum_tbl, "./output data files/Supplemental_summary_table.csv")

```

## ToxCast Internal Replicates

### Single-con internal Replicate performance

ToxCast Ph1\_v2 library included internal replicates. They are the same chemical but under different sample id, therefore tested blindly with each sample replicated three times. .

There are 12 chemicals been repeated, showed in the following table

```
name_code <- spid_chnm_table %>% dplyr::select(spid, casn, chnm)
#check which chemical is repeated in toxcast ph1_v2 library
chnm_freq <- data.frame(table(name_code$chnm)) %>% arrange(desc(Freq))
internal_rep <- head(chnm_freq, 12)
knitr::kable(internal_rep)
```

| Var1                           | Freq |
|--------------------------------|------|
| 2,4-Dichlorophenoxyacetic acid | 3    |
| Azoxystrobin                   | 3    |
| Bisphenol A                    | 3    |
| Mancozeb                       | 3    |
| Triclosan                      | 3    |
| Allethrin                      | 2    |
| Bensulide                      | 2    |
| Clorophene                     | 2    |
| Dibutyl phthalate              | 2    |
| Oryzalin                       | 2    |
| PFOS                           | 2    |
| Triadimenol                    | 2    |

```
##add chnm to sc data
sc_unblind <- left_join(dt_sc_norm, name_code, by= "spid")
## get sc data for interval replicates
sc_rep <- sc_unblind %>% dplyr::filter(chnm %in% internal_rep$Var1)
sc_rep$chnm <- str_replace(sc_rep$chnm, "2,4-Dichlorophenoxyacetic acid", "2,4-D")

library(RColorBrewer)
ggplot(sc_rep, aes(x=reorder(chnm, -nval_median), y=nval_median) ) +
  geom_point(size=2, alpha = 0.8, aes(shape=pid, color=chnm),
            position = position_jitter(width=0.3)) +
  xlab("") +
  ylab("Iodide Uptake (% of Control)") +
  geom_hline(yintercept = 80, linetype="dashed", color="violetred1") +
  geom_hline(yintercept = 100, alpha=0.8) +
  scale_y_continuous(breaks = seq(from = 0, to =100, by=20)) +
  theme_bw(base_size = 12) +
  theme(axis.text.x = element_text(angle=35, vjust=1, hjust=1),
        axis.title = element_text(size = rel(0.8))) +
  theme(legend.position="none")
```

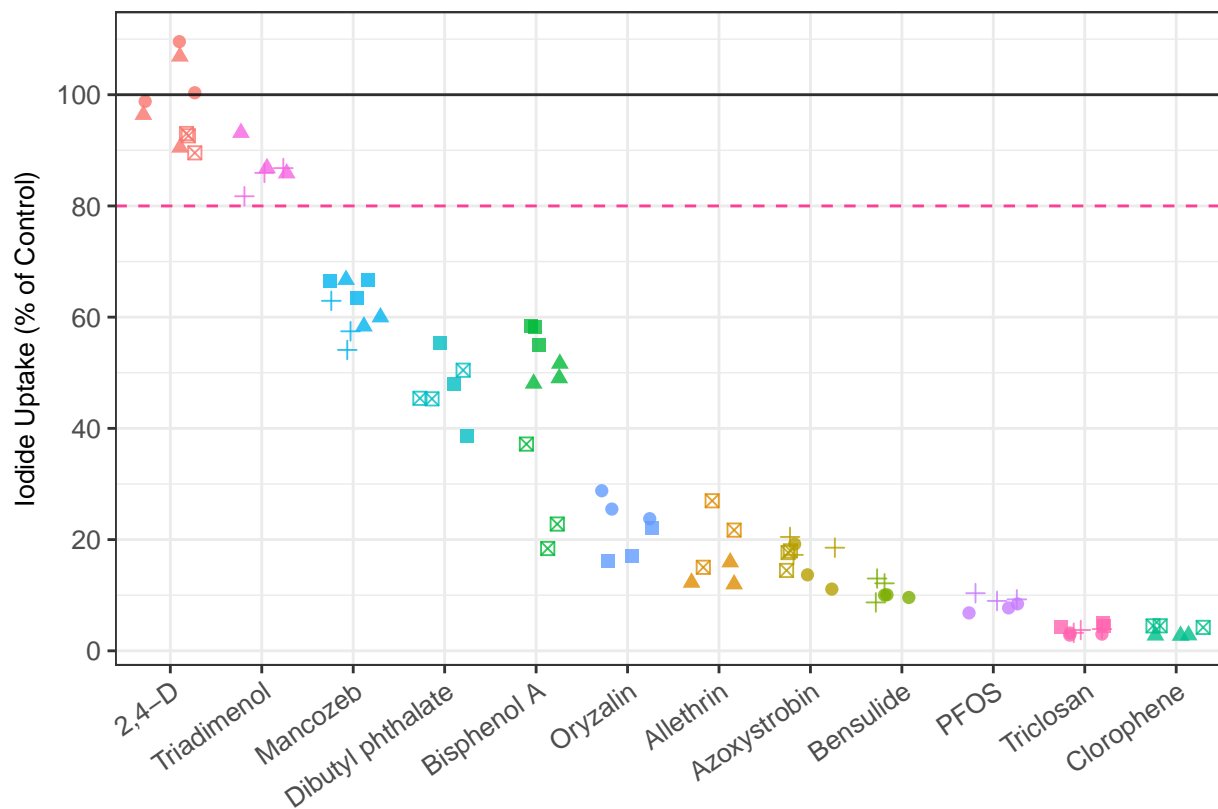

### Multi-con internal controls replication performance

```
##add chnm to mc data
mc_unblind <- left_join(dt_mc_norm, name_code, by= c("spid"="spid"))

##getting reps's metrics
mc_rep_sum <-
  sum_tbl %>% filter(chnm %in% internal_rep$Var1)

## getting range of ac50s
mc_rep_sum %>%
  filter(!is.na(AC50_prim)) %>%
  group_by(chnm) %>%
  summarize(min = min(AC50_prim),
            max= max(AC50_prim),
            range = min - max) %>%
  arrange(desc(range)) %>%
  knitr::kable(digits = 2, caption = "Range of AC50 for internal replicates")
```

Table 12: Range of AC50 for internal replicates

| chnm              | min   | max   | range |
|-------------------|-------|-------|-------|
| Dibutyl phthalate | -4.54 | -4.53 | -0.02 |
| PFOS              | -4.75 | -4.72 | -0.02 |



| chnm         | min   | max   | range |
|--------------|-------|-------|-------|
| Oryzalin     | -4.38 | -4.35 | -0.03 |
| Bisphenol A  | -4.36 | -4.30 | -0.06 |
| Bensulide    | -4.42 | -4.31 | -0.11 |
| Triclosan    | -5.06 | -4.92 | -0.14 |
| Mancozeb     | -4.92 | -4.75 | -0.17 |
| Azoxystrobin | -4.58 | -4.39 | -0.19 |
| Clorophene   | -4.87 | -4.64 | -0.22 |
| Allethrin    | -4.52 | -4.27 | -0.24 |

```
##plot all points of ac50
ggplot(mc_rep_sum, aes(x=reorder(chnm, AC50_prim), y=AC50_prim) ) +
  geom_point(size = 2, alpha = 0.6, shape = 16) +
  xlab("") +
  ylab("AC50 (logM)") +
  ylim(-6, -4) +
  theme_bw(base_size = 12) +
  theme(axis.text.x = element_text(angle=30, vjust=1, hjust=1),
        #axis.text.y = element_text(size = 5),
        legend.position = "none",
        axis.title = element_text(size = rel(0.8))
        #plot.margin = NULL
  )
```

```
## Warning: Removed 1 rows containing missing values (geom_point).
```

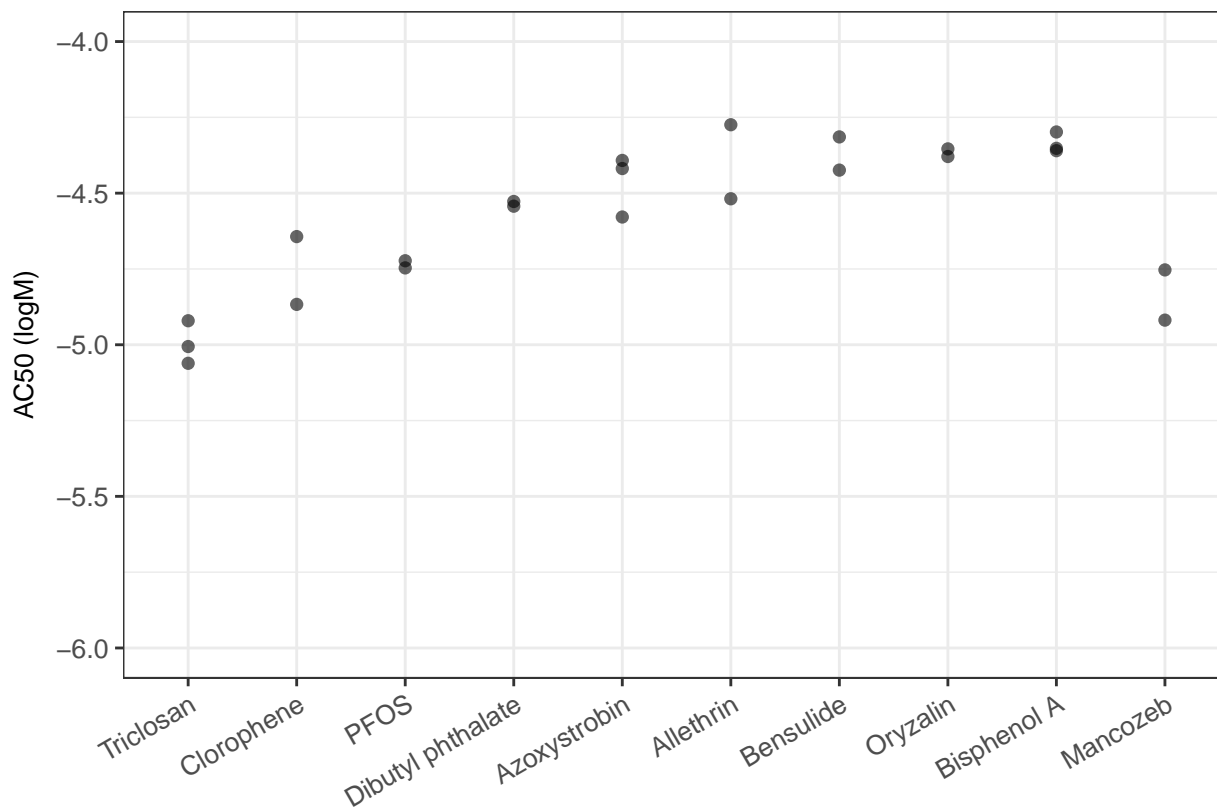

## Export Dose-Response Curve

### Make plots

```
#plot all
allplot <- toxplot::plot_tcpl(mc_model, sum_tbl, spid_chnm_table, notation = T)
# allplot[[1]] + scale_color_manual(values=c("#e02929", "#377eb8"),
#                                   labels = c("Cell Viability", "RAIU"))

for (i in 1:length(allplot)) {
  allplot[[i]] <- allplot[[i]] + scale_color_manual(values=c("#e02929", "#377eb8"),
                                                    labels = c("Cell Viability", "RAIU"))
}

allplot[[1]]
```

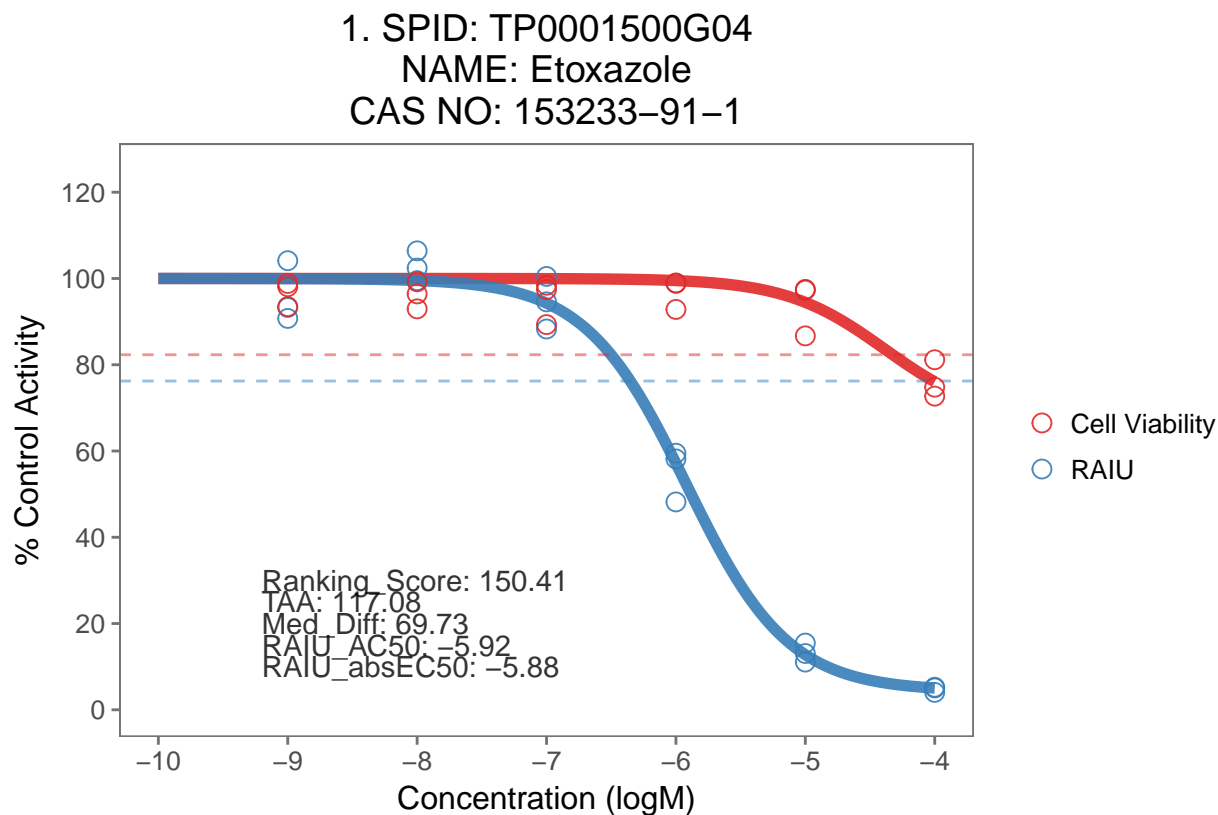

Export as PDF file.

```
# Export plots as pdf file
save_plot_pdf(allplot, "./output/plots/ranked_dose_response_plots.pdf")
```

Fig. 3

```

# Top 15 samples graphs group
ap_mini <- toxplot::plot_tcpl_minimal(mc_model, sum_tbl, spid_chnm_table, notation = T)

tiff('./output plots/top15v6.tiff', units="px",
      width=750*12.5, height=1000*12.5, res=900, compression = "lzw")
multiplot(ap_mini[[1]],ap_mini[[2]],ap_mini[[3]],
          ap_mini[[4]],ap_mini[[5]],ap_mini[[6]],
          ap_mini[[7]],ap_mini[[8]],ap_mini[[9]],
          ap_mini[[10]],ap_mini[[11]],ap_mini[[12]],
          ap_mini[[13]],ap_mini[[14]],ap_mini[[15]],
          layout = matrix(c(1,2,3,4,5,6,7,8,9,10,11,12,13,14,15), nrow=5, byrow=TRUE))
dev.off()

# three graphs for ETC disruption
tiff('./output plots/3_ETC_Disruption.tiff', units="px",
      width=750*12.5, height=200*12.5, res=900, compression = "lzw")
multiplot(ap_mini[[17]],ap_mini[[58]], ap_mini[[42]],
          layout = matrix(c(1,2,3), nrow=1, byrow=TRUE))
dev.off()

```

## R source code in ToxPlot package

Main R functions written for this analysis were compiled as an R package ToxPlot, and version 0.1.0 is available on [CRAN](#).

For the most up-to-date version please go to the [github link](#).

Below is the source code of ToxPlot ver.0.1.0 used in this analysis.

```

#' normalize per plate
#'
#' normalize raw readings as percent of median vehicle control wells
#'
#' @param dt data.frame contains essential columns with the raw data.
#' @param nctrl the name (spid) of the vehicle/solvent control used for calculation
#'
#' @return data.frame with normalized value columns. 'nval_mean' column is the normalized value
#' calculated using the mean of vehicle control wells, 'nval_median' column is the normalized value
#' calculated using the median of vehicle control wells.
#' @import dplyr
#'
#' @examples
#' ## normalize demo data
#' demo_mc_norm <- normalize_per_plate(demo_mc, nctrl = "DMSO")
#'
#' @export

normalize_per_plate <- function(dt, nctrl = "DMSO") {

  # claim variables for passing R CMD Check
  assay <- spid <- apid <- rval <- NULL

  output <- data.frame()

```

```

#iterate through each assay, calculate separately
for (as in unique(dt$assay)) {
  df_t <- normalize_single_assay(dplyr::filter(dt, assay == as), nctrl)
  output <- dplyr::bind_rows(output, df_t)
}

return(output)
}

#' normalize per plate (from single assay data)
#'
#' normalize raw readings as percent of median/mean vehicle control wells, per assay, per plate.
#' This function is called by normalize_per_plate, should not be called directly by user.
#' #'
#' @param dt data.frame contains essential columns with the raw data.
#' @param nctrl the name (spid) of the vehicle/solvent control used for calculation
#'
#' @return data.frame with normalized value columns. 'nval_mean' column is the normalized value
#' calculated using the mean of vehicle control wells, 'nval_median' column is the normalized value
#' calculated using the median of vehicle control wells.
#' @import dplyr
#
normalize_single_assay <- function(dt, nctrl) {

  # claim variables for passing R CMD Check
  assay <- spid <- apid <- rval <- NULL

  #calculate the mean and median value for negative control
  ctrl_avg <- dt %>%
    dplyr::filter(spid == nctrl) %>%
    dplyr::group_by(apid) %>%
    dplyr::summarize(mean_DMSO = mean(rval, na.rm = TRUE),
                     median_DMSO = stats::median(rval, na.rm = TRUE))

  #iterate through the data table to calculate normalized percent activity
  #normalization was done using both mean and median separately.

  temp <- data.frame()
  for (id in ctrl_avg$apid){
    med <- dplyr::filter(ctrl_avg, apid == id)$median_DMSO
    avg <- dplyr::filter(ctrl_avg, apid == id)$mean_DMSO
    t <- dplyr::filter(dt, apid == id) %>%
      mutate(nval_mean = 100 * rval/avg,
             nval_median = 100 * rval/med)
    temp <- bind_rows(temp, t)
  }
  return(temp)
}

#' Quality-control metrics calculation
#'

```

```

#' Calculate QC metrics, including Z' score, CV of DMSO negative control, per assay plate.
#'
#' @param d data.frame contains essential columns with the raw data.
#' @param resp response type, specify either 'nval_median' or 'nval_mean' for QC calculation
#' @param assay_info assay_info list, contains names of primary and cytotox assay, names must match
#' what are provided in the raw data, under the column 'assay'.
#'
#' @examples
#' ## calculate QC measures from demo data
#' assay_info <- list(prim_assay = "Primary",toxi_assay = "Cytotox")
#' demo_mc_norm <- normalize_per_plate(demo_mc, nctrl = "DMSO")
#' qc <- qc_per_plate(demo_mc_norm, assay_info)
#'
#' @return three dataframe each representing negative control stats, positive control stats and QC metrics
#' @export
# QC measures are calculated per 96-well plate. 'apid' plus 'assay' column can serve as the ID to distinguish
qc_per_plate <- function(d, assay_info, resp = "nval_median") {

  # claim variables for passing R CMD Check
  assay <- apid <- wllt <- conc <- CV_DMSO <- SSMD <- Z_prime <- logc <- mean_DMSO <- mean_positive <-
  sd_positive <- sd_DMSO <- unique_id <- NULL

  # choose which normalized value to use (median based or mean based)
  if (resp == "nval_mean") {
    d$resp <- d$nval_mean
  } else if (resp == "nval_median") {
    d$resp <- d$nval_median
  } else {
    stop("specify either nval_median or nval_mean for QC calculation")
  }

  # create unique ID for each plate (apid + assay)
  # (can also distinguish between primary and cytotox assays)
  # group by the unique ID.
  d <- d %>% #dplyr::mutate(uid = paste(apid, assay)) %>%
    # dplyr::group_by(pid, assay, repi)
    dplyr::group_by(apid, assay)

  # calculate vehicle control (e.g., DMSO etc.) qc stats
  # use welltype = n to identify vehicle control
  n_ctrl_sum <- d %>%
    dplyr::filter(wllt == "n") %>%
    dplyr::summarize(count_DMSO = n(), #count of DMSO control wells on each plate
                     count_DMSO_NA = sum(is.na(resp)), #count of DMSO control wells with missing va
                     mean_DMSO = mean(resp, na.rm = TRUE),
                     sd_DMSO = stats::sd(resp, na.rm = TRUE),
                     CV_DMSO = 100 * stats::sd(resp, na.rm = TRUE) / mean(resp, na.rm = TRUE)
                     # median_DMSO= median(resp, na.rm=TRUE),
                     # mad_DMSO= mad(resp, constant = 1, na.rm=TRUE),
                     # bmad_DMSO= mad(resp, constant = 1.4826, na.rm=TRUE),

```

```

        # three_bmad = 3*bmad_DMSO
        )

# calculate positive control stats
pctrl_prim <- d %>%
  dplyr::filter(assay == assay_info$prim_assay,
               wlt == "pr") %>%
  dplyr::filter(conc == max(conc)) %>%
  dplyr::summarize(sd_positive = stats::sd(resp, na.rm = TRUE),
                  mean_positive = mean(resp, na.rm = TRUE))

pctrl_toxi <- d %>%
  dplyr::filter(assay == assay_info$toxi_assay,
               wlt == "pc") %>%
  dplyr::filter(conc == max(conc)) %>%
  dplyr::summarize(sd_positive = stats::sd(resp, na.rm = TRUE),
                  mean_positive = mean(resp, na.rm = TRUE))

p_ctrl_sum <- bind_rows(pctrl_prim, pctrl_toxi)
remove(pctrl_toxi, pctrl_prim)

# calculate Z', SSMD

qc <- dplyr::left_join(p_ctrl_sum, n_ctrl_sum,
                      by=c("apid"="apid", "assay"="assay")) %>%
  #replace NaN with 0 in sd_positive
  dplyr::mutate(sd_positive = (ifelse(is.na(sd_positive), 0, sd_positive))) %>%
  dplyr::mutate(Z_prime = 1 - 3*(sd_positive + sd_DMSO) / (abs(mean_positive - mean_DMSO)),
               SSMD = (abs(mean_positive - mean_DMSO) / sqrt(sd_positive^2 + sd_DMSO^2))) %>%
  dplyr::mutate(unique_id = paste(apid, assay, sep = "_")) %>%
  dplyr::select(unique_id, apid, assay, CV_DMSO, Z_prime, SSMD)

list(neg_ctrl_sum = n_ctrl_sum,
     pos_ctrl_sum = p_ctrl_sum,
     qc = qc)
}

#' save plots in pdf
#'
#' save ggplot2 plots generated in a list to a pdf file
#'
#' @param plot_list the r list object contains all ggplot2 objects
#' @param filename the output file name, including the file directory
#'
#' @examples
#' ## start from raw data
#' # define assay

```

```

#' assay_info <- list(prim_assay = "Primary",toxi_assay = "Cytotox")
#' # data normalization
#' demo_mc_norm <- normalize_per_plate(demo_mc, nctrl = "DMSO")
#' # filter out two test chemicals
#' demo_mc_norm <- dplyr::filter(demo_mc_norm, spid %in% c("TP0001502B05", "TP0001502B01"))
#' # fit curve with default 20% threshold
#' demo_md <- fit_curve_tcpl(demo_mc_norm, assay_info)
#' # calculate TAA and Med_diff only
#' demo_rank <- rank_tcpl(demo_md, med_taa = NULL, med_med_diff = NULL)
#' #produce plots with notations
#' demo_plots <- plot_tcpl_minimal(demo_md, demo_rank, notation = TRUE)
#'
#' ## save all the plots as pdf
#' # save_plot_pdf(demo_plots, ".\output plots\all_plots.pdf")
#'
#' ## save the 1st plot as pdf
#' # save_plot_pdf(demo_plots[1], ".\output plots\plot1.pdf")
#'
#'
#'
#' @export
#'

save_plot_pdf <- function(plot_list, filename) {
  # claim variables for passing R CMD Check
  assay <- spid <- apid <- rval <- NULL

  grDevices::pdf(filename)
  cat("Preparing file...\n")
  invisible(lapply(plot_list, print))
  grDevices::dev.off()
  cat("Finished!")
}

#' round digits of numbers
#'
#' round numbers in a dataframe to specified digits
#'
#' @param df the dataframe input
#' @param digits the specified number of digits
#' @return a dataframe
#'
#'
round_df <- function(df, digits) {
  nums <- vapply(df, is.numeric, FUN.VALUE = logical(1))
  df[,nums] <- round(df[,nums], digits = digits)
  df
}

# -----

```

```

# function to scale dataset from 0 to 100
# -----

rescale_0_100 <- function(x) {
  y <- scale(x, center = min(x, na.rm = T), scale = diff(range(x, na.rm = T)))
  as.vector(y) * 100
}

## function to generate index for concentrations

## both are targeting unique(x), 'match' provide the position of each x value on the list of unique(x),
## while 'rank' provide the ordering index that is exported for each component of unique(x)

generate_index <- function(x) {
  uls <- unique(x)
  index <- rank(uls)[match(x, uls)]
  return(as.integer(index))
}

#' hill mode in ToxCast tcpl package
#'
#' @param p a vector containing the Hill model parameters: top, log AC50, hill coefficient
#' @param x a vector of log concentrations
#' @return calculated y value based on the x and model parameters
#'
hill_model <- function(p, x) {
  y <- p[1] / (1 + 10 ^ ((p[2] - x) * p[3]))
  return(y)
}

# ##=====inversed hill model (using 100- the Y value)=====##
# hill_model_inverse <- function(p, x) {
#   ### p: a numeric vector of length 4 containg the starting values for
#   ### the hill model, in order: top, log AC50, hill
#   ### coefficient
#   ### x: a numeric vector containing the log concentration values
#   #
#   y <- 100 - (p[1] / (1 + 10 ^ ((p[2] - x) * p[3])))
#   return(y)
# }

#' calculate absolute EC_anything based on tcpl hill model
#'
#' @param p a vector containing the Hill model parameters: top, log AC50, hill coefficient
#' @param y the y value
#' @return calculated x value

log_abs_ec <- function(p, y) {
  ## y value is the absolute response value
  ##p[1] is top parameter
  ##p[2] is ga, logac50

```



```

##p[3] is gw, hillslope
suppressWarnings(x <- p[2] - log10((p[1] - y) / y) / p[3])
if (is.nan(x)) {x <- NA}
return(x)
}

#' function to calculate Area Under the Curve (AUC) of the hill model
#'
#' @param p a vector containing the Hill model parameters: top, log AC50, hill coefficient
#' @param lower lower boundary of x for integration
#' @param upper upper boundary of x for integration
#' @return calculated area under the curve (AUC) value
#'
auc_hill_tcpl <- function(p, lower, upper) {
  # if (is.na(lower)){
  #   cat("lower boundary is NA")
  # } else if (is.nan(lower)){
  #   cat("lower boudary is NaN")
  # }
  #
  # if (is.na(upper)){
  #   cat("upper boundary is NA")
  # } else if (is.nan(upper)){
  #   cat("upper boudary is NaN")
  # }

  #define the hill model function
  hill <- function(x) {
    p[1] / (1 + 10 ^ ((p[2] - x) * p[3]))
  }
  a <- stats::integrate(hill, lower = lower, upper = upper)
  return(a[[1]])
}

#' fit dose-resopnse curve using tcpl hill model
#'
#' Curve fitting using the tcplFit function in `tcpl` package.
#' Chemicals are modelled based on spid.
#' If you want to model the same chemical (e.g. positive controls),
#' then assign different spid to this chemical so the function can separate them out.
#' Absolute IC20 and absolute IC50 are calculated as well.
#'
#' @param df input data contain normalized assay readings
#' @param assay_info predefined names for primary and cytotoxicity assays,
#' use NULL if either one of the assay does not need to be modeled.
#' @param prim_cutoff significance cutoff for primary assay (eg. 3sigma or 3bMAD)
#' @param toxi_cutoff significance cutoff for cytotoxicity assay (eg. 3sigma or 3bMAD)
#'
#' @return A list object containing modeling results, the corresponding data for each chemical.

```

```

#'
#' @examples
#' ## fit curve with default significant threshold 20
#'
#' demo_md <- fit_curve_tcpl(demo_mc_norm, assay_info =
#' list(prim_assay = "Primary", toxi_assay = "Cytotox"))
#'
#' ## start from raw data
#' # define assay
#' assay_info <- list(prim_assay = "Primary", toxi_assay = "Cytotox")
#' # data normalization
#' demo_mc_norm <- normalize_per_plate(demo_mc, nctrl = "DMSO")
#' # filter out two test chemicals
#' demo_mc_norm <- dplyr::filter(demo_mc_norm, spid %in% c("TP0001502B05", "TP0001502B01"))
#' # fit curve with default 20% threshold
#' demo_md <- fit_curve_tcpl(demo_mc_norm, assay_info)
#'
#' ## fit curve with specified significance threshold
#' demo_md <- fit_curve_tcpl(demo_mc_norm, assay_info, prim_cutoff = 25, toxi_cutoff = 25)
#'
#'
#' @import dplyr
#' @export

fit_curve_tcpl <- function(df, assay_info, prim_cutoff = 20, toxi_cutoff = 20) {

  # claim variables for passing R CMD Check
  conc <- spid <- assay <- apid <- NULL

  st_time <- Sys.time()
  r_list <- list()
  c_list <- list()
  bmad_prim <- prim_cutoff/3
  bmad_toxi <- toxi_cutoff/3
  # get log concentration
  df <- df %>% dplyr::mutate(logc = log10(conc))
  spid_list <- unique(df$spid)
  if (is.null(assay_info$prim) & is.null(assay_info$toxi_assay)) {
    stop("assay_info cannot be NULL for both primary and cytotoxicity assay")
  }
  n <- 1
  prim_md <- toxi_md <- model_list <- list()
  cat("Processing", length(unique(df$spid)), "samples(spids)...\n")
  # process by each spid
  for (id in unique(df$spid)) {
    #d <- df %>% dplyr::filter(spid == i)
    cat(id, "||")
    # model raiu data
    # check if toxi assay data is available, if not, skip modeling
    if (is.null(assay_info$prim_assay)) {
      prim_md <- NA
      prim_dt <- NA
    } else {

```

```

prim_dt <- df %>% dplyr::filter(spид == id, assay == assay_info$prim_assay)
m <- tcpl::tcplFit(logc = prim_dt$logc, resp = 100 - prim_dt$nval_median, bmad_prim)
absIC50 <- log_abs_ec(c(m$hill_tp, m$hill_ga, m$hill_gw), 50)
absIC20 <- log_abs_ec(c(m$hill_tp, m$hill_ga, m$hill_gw), 20)
m[["absIC20"]] <- absIC20
m[["absIC50"]] <- absIC50
m[["apid"]] <- prim_dt[[1,1]]
m[["assay"]] <- assay_info$prim_assay
m[["spид"]] <- id
#prim_md <- dplyr::bind_rows(prim_md, m)
# print(m)
prim_md <- data.frame(m) %>% dplyr::select(apid, assay, spид, everything())
}

# model cytotox data
# check if toxi assay data is available, if not, skip modeling
if (is.null(assay_info$toxi_assay)) {
  toxi_md <- NA
  toxi_dt <- NA
} else {
  toxi_dt <- df %>% dplyr::filter(spид == id, assay==assay_info$toxi_assay)
  m <- tcpl::tcplFit(logc = toxi_dt$logc, resp = 100 - toxi_dt$nval_median, bmad_toxi)
  absIC50 <- log_abs_ec(c(m$hill_tp, m$hill_ga, m$hill_gw), 50)
  absIC20 <- log_abs_ec(c(m$hill_tp, m$hill_ga, m$hill_gw), 20)
  m[["absIC20"]] <- absIC20
  m[["absIC50"]] <- absIC50
  m[["apid"]] <- toxi_dt[[1,1]]
  m[["assay"]] <- assay_info$toxi_assay
  m[["spид"]] <- id
  #toxi_md <- dplyr::bind_rows(toxi_md, m)

  toxi_md <- data.frame(m) %>% dplyr::select(apid, assay, spид, everything())
}

#build final model list
model_list[[n]] <- list(spид = id,
  model_prim = prim_md,
  model_toxi = toxi_md,
  data_prim = prim_dt,
  data_toxi = toxi_dt,
  cutoff_prim = prim_cutoff,
  cutoff_toxi = toxi_cutoff,
  assay_info = assay_info)

n <- n + 1
}

time <- difftime(Sys.time(), st_time) %>% round(1)
cat("\nCurve Fitting Completed!\nCalculation time:", paste(unclass(time), units(time)), "\n\n")

```

```

return(model_list)
}

#' function to calculate ranking score, TAA, med_diff, EC values based on tcpl hill model
#'
#' calculate ranking score, TAA, med_diff, absolute EC values, AC50, based on the hill model in tcpl pa
#'
#' @param tcpl_models the list object returned by 'fit_curve_tcpl' function
#' @param spid_chnm_table a reference table with 'spid' and the corresponding chemical name 'chnm' colu
#' and the CAS number 'casn' column.
#' @param med_taa the median TAA value from reference chemical, if not supplied, then ranking score won
#' @param med_med_diff the median Median-Difference from reference chemical, if not supplied, then rank
#' @return a dataframe containing ranking metrics for each chemical (spid)
#'
#' @examples
#' ## start with normalized data
#' demo_md <- fit_curve_tcpl(demo_mc_norm, assay_info =
#' list(prim_assay = "Primary", toxi_assay = "Cytotox"))
#' demo_rank <- rank_tcpl(demo_md)
#'
#' ## start from raw data
#' # define assay
#' assay_info <- list(prim_assay = "Primary", toxi_assay = "Cytotox")
#' # data normalization
#' demo_mc_norm <- normalize_per_plate(demo_mc, nctrl = "DMSO")
#' # filter out two test chemicals
#' demo_mc_norm <- dplyr::filter(demo_mc_norm, spid %in% c("TP0001502B05", "TP0001502B01"))
#' # fit curve with default 20% threshold
#' demo_md <- fit_curve_tcpl(demo_mc_norm, assay_info)
#' # calculate TAA and Med_diff only
#' demo_rank <- rank_tcpl(demo_md, med_taa = NULL, med_med_diff = NULL)
#'
#' ## calculate ranking score with specified median TAA and meidan Med_Difference
#' demo_rank <- rank_tcpl(demo_md, med_taa = 150, med_med_diff = 92)
#'
#' @export
rank_tcpl <- function(tcpl_models, spid_chnm_table = NULL, med_taa = NULL, med_med_diff = NULL) {

  # claim variables for passing R CMD Check
  taa_norm <- med_diff_norm <- ranking_score <- spid <- logc <- nval_median <- NULL

  df <- data.frame()
  ##iterate through each spid
  for (i in seq_along(tcpl_models)) {
    #get chemical sample id 'spid'
    .spid <- tcpl_models[[i]]$spid
    # print(i)
    # print(.spid)
    #get chnm

```

```

if (!is.null(spid_chnm_table)) {
  chnm <- dplyr::filter(spid_chnm_table, spid == .spid)$chnm
  casn <- dplyr::filter(spid_chnm_table, spid == .spid)$casn
} else {
  chnm <- NA
  casn <- NA
}

assay_info <- tcpl_models[[i]]$assay_info
if (is.null(assay_info$toxi_assay)) {
  stop("No toxi_assay, ranking score is not calculable!")
}
#extract modelling results
m_toxi <- tcpl_models[[i]]$model_toxi
m_prim <- tcpl_models[[i]]$model_prim

#cutoff
cutoff_prim <- tcpl_models[[i]]$cutoff_prim
cutoff_toxi <- tcpl_models[[i]]$cutoff_toxi

#
#calculate med_diff at max(logc)
max_prim <- tcpl_models[[i]]$data_prim %>%
  dplyr::filter(logc == max(logc)) %>%
  dplyr::summarize(median = stats::median(nval_median))
max_toxi <- tcpl_models[[i]]$data_toxi %>%
  dplyr::filter(logc == max(logc)) %>%
  dplyr::summarize(median = stats::median(nval_median))
med_diff <- max_toxi$median - max_prim$median

##get auc, logEC_3bmadprim, for prim
##first check if significant response was present and hill model was fitted
if (!is.na(m_prim$hill) & m_prim$hill == 1) {
  para_prim <- c(m_prim$hill_tp, m_prim$hill_ga, m_prim$hill_gw)
  #get auc
  ## check if the modeled curve pass through the cutoff line.
  ## if not, then assign 0 to area.
  if (hill_model(para_prim,m_prim$logc_max) >= cutoff_prim) {
    lr <- log_abs_ec(para_prim, cutoff_prim)
    aa_prim <-
      auc_hill_tcpl(para_prim, lower = lr, upper = m_prim$logc_max) - cutoff_prim * (m_prim$logc_max - lr)
  } else {
    aa_prim <- 0
    lr <- -3
  }
  # lr <- log_abs_ec(para_prim, cutoff_prim)
  #
  # aa_prim <-
  #   auc_hill_tcpl(para_prim, lower = lr, upper = m_prim$logc_max) - cutoff_prim * (m_prim$logc_max - lr)
  #get AC50
  AC50_prim <- m_prim$hill_ga
  #get absEC
  if (hill_model(para_prim,m_prim$logc_max) > 50) {

```

```

    absEC50_prim <- log_abs_ec(para_prim, 50)
    absEC80_prim <- log_abs_ec(para_prim, 20)
  } else if (hill_model(para_prim,m_prim$logc_max) > 20) {
    absEC50_prim <- NA
    absEC80_prim <- log_abs_ec(para_prim, 20)
  } else {
    absEC80_prim <- NA
    absEC50_prim <- NA
  }
} else {
  aa_prim <- NA
  lr <- NA
  absEC80_prim <- NA
  absEC50_prim <- NA
  AC50_prim <- NA
}

##get auc, logEC_3bmadprim, for tox
if (!is.na(m_toxi$hill) & m_toxi$hill == 1) {
  para_toxi <- c(m_toxi$hill_tp, m_toxi$hill_ga, m_toxi$hill_gw)
  #get AC50
  AC50_toxi <- m_toxi$hill_ga
  #get aa_toxi
  if (hill_model(para_toxi,m_prim$logc_max) > cutoff_prim) {
    lc <- log_abs_ec(para_toxi, cutoff_prim)
    aa_toxi <-
      auc_hill_tcpl(para_toxi,lower = lc, upper = m_prim$logc_max) - cutoff_prim * (m_prim$logc_max)
  } else {
    aa_toxi <- NA
    lc <- -3
  }
}

#calculate absEC
if (hill_model(para_toxi,m_prim$logc_max) > 50) {
  absEC50_toxi <- log_abs_ec(para_toxi, 50)
  absEC80_toxi <- log_abs_ec(para_toxi, 20)
} else if (hill_model(para_toxi,m_prim$logc_max) > 20) {
  absEC50_toxi <- NA
  absEC80_toxi <- log_abs_ec(para_toxi, 20)
} else {
  absEC80_toxi <- NA
  absEC50_toxi <- NA
}
#get cytotox limit (absEC_cutoff_toxi)
absEC_ct_toxi <- log_abs_ec(para_toxi, cutoff_toxi)
} else {
  aa_toxi <- NA
  lc <- -3
  absEC80_toxi <- NA
  absEC50_toxi <- NA
  AC50_toxi <- NA
  absEC_ct_toxi <- NA
}
}

```

```

##calculate taa
if (is.na(aa_prim)) {
  taa <- NA
} else if (is.na(aa_toxi)) {
  taa <- aa_prim
} else {
  taa <- aa_prim - aa_toxi
}

##calculate selectivity based logEC value at 3bmad of prim assay.
if (is.na(lr)) {
  selectivity_3bmad <- NA
} else {
  selectivity_3bmad <- lc - lr
}

##calculate selectivity based on logAC50 (original method)
if (is.na(m_prim$hill_ga)) {
  selectivity_AC50 <- NA
} else if (is.na(m_toxi$hill_ga)) {
  selectivity_AC50 <- -3 - m_prim$hill_ga
} else {
  selectivity_AC50 <- m_toxi$hill_ga - m_prim$hill_ga
}

##gather taa and selectivity into one table
t <- data.frame(
  index = i,
  spid = .spid,
  chnm = chnm,
  casn = casn,
  # aa_toxi = aa_toxi,
  # aa_prim = aa_prim,
  taa = taa,
  # sel_3bMAD = selectivity_3bmad,
  # sel_AC50 = selectivity_AC50,
  med_diff = med_diff,
  AC50_toxi = AC50_toxi,
  AC50_prim = AC50_prim,
  absEC80_toxi = absEC80_toxi,
  absEC50_toxi = absEC50_toxi,
  absEC80_prim = absEC80_prim,
  absEC50_prim = absEC50_prim,
  cyto_lim = absEC_ct_toxi
)

df <- base::rbind(df, t)
}

#calculate ranking_score
#this done by adding 0-100 rescaled TAA value an med_diff value
# df <- df %>%

```

```

#   dplyr::mutate(taa_rescale = rescale_0_100(taa),
#               med_diff_rescale = rescale_0_100(med_diff),
#               ranking_score = taa_rescale + med_diff_rescale ) %>%
#   dplyr::arrange(desc(ranking_score))
if (is.null(med_taa)&is.null(med_med_diff)) {
  df <- df %>%
  dplyr::mutate(ranking_score = NA)
} else {
  df <- df %>%
  dplyr::mutate(taa_norm = taa/med_taa*100,
               med_diff_norm = med_diff/med_med_diff*100,
               ranking_score = taa_norm + med_diff_norm ) %>%
  dplyr::arrange(desc(ranking_score))
}

return(df)
}

#' function to summarize curve fitting results
#'
#' @param tcpl_models the list object returned by 'fit_curve_tcpl' function
#' @param spid_chnm_table a reference table with 'spid' and the corresponding chemical name 'chnm' column
#' and the CAS number 'casn' column.
#' @return a data.frame contains summarized metrics for each chemical (spid)
#'
#' @examples
#' ## supply models as the essential argument. spid_chnm_table is optional.
#' demo_md <- fit_curve_tcpl(demo_mc_norm, assay_info =
#' list(prim_assay = "Primary", toxi_assay = "Cytotox"))
#' demo_sum <- summary_tcpl(demo_md)
#'
#' ## start from raw data
#' # define assay
#' assay_info <- list(prim_assay = "Primary", toxi_assay = "Cytotox")
#' # data normalization
#' demo_mc_norm <- normalize_per_plate(demo_mc, nctrl = "DMSO")
#' # filter out two test chemicals
#' demo_mc_norm <- dplyr::filter(demo_mc_norm, spid %in% c("TP0001502B05", "TP0001502B01"))
#' # fit curve with default 20% threshold
#' demo_md <- fit_curve_tcpl(demo_mc_norm, assay_info)
#' # obtain summary table
#' demo_sum <- summary_tcpl(demo_md)
#'
#' @export
summary_tcpl <- function(tcpl_models, spid_chnm_table = NULL) {

```



```

# claim variables for passing R CMD Check
spid <- NULL

df <- data.frame()
##iterate through each spid
for (i in seq_along(tcpl_models)) {
  #get chemical sample id 'spid'
  .spid <- tcpl_models[[i]]$spid
  # print(i)
  # print(.spid)
  #get chnm
  if (!is.null(spid_chnm_table)) {
    chnm <- dplyr::filter(spid_chnm_table, spid == .spid)$chnm
    casn <- dplyr::filter(spid_chnm_table, spid == .spid)$chnm
  } else {
    chnm <- NA
  }

  #extract modelling results
  m_toxi <- tcpl_models[[i]]$model_toxi
  m_prim <- tcpl_models[[i]]$model_prim

  #cutoff
  cutoff_prim <- tcpl_models[[i]]$cutoff_prim
  cutoff_toxi <- tcpl_models[[i]]$cutoff_toxi

  #get assay_info
  assay_info <- tcpl_models[[i]]$assay_info

  ##get metrics for prim
  if (is.null(assay_info$prim_assay)) {
    absEC80_prim <- NA
    absEC50_prim <- NA
    AC50_prim <- NA
  } else {
    if (!is.na(m_prim$hill) & m_prim$hill == 1) {
      para_prim <- c(m_prim$hill_tp, m_prim$hill_ga, m_prim$hill_gw)
      #get AC50
      AC50_prim <- m_prim$hill_ga
      #get absEC
      if (hill_model(para_prim, m_prim$logc_max) > 50) {
        absEC50_prim <- log_abs_ec(para_prim, 50)
        absEC80_prim <- log_abs_ec(para_prim, 20)
      } else if (hill_model(para_prim, m_prim$logc_max) > 20) {
        absEC50_prim <- NA
        absEC80_prim <- log_abs_ec(para_prim, 20)
      } else {
        absEC80_prim <- NA
        absEC50_prim <- NA
      }
    }
  } else {
    absEC80_prim <- NA
  }
}

```

```

    absEC50_prim <- NA
    AC50_prim <- NA
  }
}

##get metrics for toxi

if (is.null(assay_info$toxi_assay)) {
  absEC80_toxi <- NA
  absEC50_toxi <- NA
  AC50_toxi <- NA
} else {
  if (!is.na(m_toxi$hill) & m_toxi$hill == 1) {
    para_toxi <- c(m_toxi$hill_tp, m_toxi$hill_ga, m_toxi$hill_gw)
    #get AC50
    AC50_toxi <- m_toxi$hill_ga
    #calculate absEC
    if (hill_model(para_toxi,m_toxi$logc_max) > 50) {
      absEC50_toxi <- log_abs_ec(para_toxi, 50)
      absEC80_toxi <- log_abs_ec(para_toxi, 20)
    } else if (hill_model(para_toxi,m_toxi$logc_max) > 20) {
      absEC50_toxi <- NA
      absEC80_toxi <- log_abs_ec(para_toxi, 20)
    } else {
      absEC80_toxi <- NA
      absEC50_toxi <- NA
    }
  } else {
    absEC80_toxi <- NA
    absEC50_toxi <- NA
    AC50_toxi <- NA
  }
}

##gather taa and selectivity into one table
t <- data.frame(
  index = i,
  spid = .spid,
  chnm = chnm,
  AC50_toxi = AC50_toxi,
  AC50_prim = AC50_prim,
  absEC80_toxi = absEC80_toxi,
  absEC50_toxi = absEC50_toxi,
  absEC80_prim = absEC80_prim,
  absEC50_prim = absEC50_prim
)

df <- base::rbind(df, t)
}

```

```

return(df)
}

#' Plot dose-resonse curves based on the tcpl hill model
#'
#' Produce the plot for the dose-response curves and data points for both primary and toxicity assay.
#' The direction of the data and dose-resonse curves are presented as the original data, rather than
#' the uptrend direction required by the 'tcpl' function. Plots are sorted by the ranking_score.
#'
#' @param tcpl_models the list object created by 'fit_curve_tcpl' function
#' @param rank_table the data.frame output from 'rank_tcpl' function
#' @param spid_chnm_table the spid, chnm, casn info table
#' @param notation value can be TRUE or FALSE, determine whehter to show potency metrics on the plot
#' @param cunit the unit of concentration, on default is "M" (molar).
#'
#' @return list of ggplot2 objects, each corresponding to one spid.
#' @import ggthemes ggplot2
#'
#' @examples
#' ## produce plots without notations
#' demo_md <- fit_curve_tcpl(demo_mc_norm, assay_info =
#' list(prim_assay = "Primary", toxi_assay = "Cytotox"))
#' plots <- plot_tcpl(demo_md)
#'
#' ## start from raw data
#' # define assay
#' assay_info <- list(prim_assay = "Primary", toxi_assay = "Cytotox")
#' # data normalization
#' demo_mc_norm <- normalize_per_plate(demo_mc, nctrl = "DMSO")
#' # filter out two test chemicals
#' demo_mc_norm <- dplyr::filter(demo_mc_norm, spid %in% c("TP0001502B05", "TP0001502B01"))
#' # fit curve with default 20% threshold
#' demo_md <- fit_curve_tcpl(demo_mc_norm, assay_info)
#' # calculate TAA and Med_diff only
#' demo_rank <- rank_tcpl(demo_md, med_taa = NULL, med_med_diff = NULL)
#' #produce plots with notations
#' demo_plots <- plot_tcpl(demo_md, demo_rank, notation = TRUE)
#'
#' ##produce plots with notations, with changed concentration unit displayed on the plot
#' demo_plots <- plot_tcpl(demo_md, demo_rank, notation = TRUE, cunit = "uM")
#'
#' @export
#'
#'
plot_tcpl <-
function(tcpl_models, rank_table=NULL, spid_chnm_table = NULL, notation = FALSE, cunit = "M") {
  # claim variables for passing R CMD Check
  spid <- nval_median <- logc <- resp <- pred <- assay <- NULL

```

```

#initiate empty output plot list
plot_list <- list()
#reorder if rank is available
if (!is.null(rank_table)) {
  tcpl_models <- tcpl_models[rank_table$index]
}

#loop through tcpl_models's unique spid.
#note tcpl_models is the level 4 output from tcpl package, including all the modelling results
for (i in seq_along(tcpl_models)) {
  #get chemical sample id and chemical name
  .spid <- tcpl_models[[i]]$spid
  #print(.spid)
  if (!is.null(spid_chnm_table)) {
    chnm <- dplyr::filter(spid_chnm_table, spid == .spid)$chnm
    casn <- dplyr::filter(spid_chnm_table, spid == .spid)$casn
  } else {
    chnm <- NA
    casn <- NA
  }

  #cutoff
  cutoff_prim <- tcpl_models[[i]]$cutoff_prim
  cutoff_toxi <- tcpl_models[[i]]$cutoff_toxi
  #assay_info
  assay_info <- tcpl_models[[i]]$assay_info

  #get normalized resonse value (cytotox and raiu together)
  #and use 100 minus the response value (inverse the plot)
  d <- dplyr::bind_rows(tcpl_models[[i]]$data_prim, tcpl_models[[i]]$data_toxi) %>%
    dplyr::mutate(resp = nval_median) %>%
    #mutate(assay = ifelse(aeid == 1, assay_info$toxi_assay, assay_info$prim_assay))

  #determine left and right x boundary of the plot
  if ( round(max(d$logc)) < max(d$logc) ) {
    rb <- round(max(d$logc)) + 1
  } else { rb <- round(max(d$logc))}

  lb <- round(min(d$logc))-1

  #initiate basic plot with data points.
  g <- ggplot(d, aes(x = logc, y = resp))

  if (!is.null(spid_chnm_table)){
    g <- g + labs(
      title = paste(i, ". SPID: ", .spid, "\nNAME: ", chnm, "\nCAS NO: ", casn, sep = ""),
      x = paste("Concentration (log", cunit, ")", sep = ""),
      y = "% Control Activity"
    )
  } else {
    g <- g + labs(
      title = paste(i, ". SPID:" , .spid),
      x = paste("Concentration (log", cunit, ")", sep = ""),

```

```

    y = "% Control Activity"
  )
}

# labs(
#   title = paste(i, "\nSPID: ", .spid, "\nNAME: ", chnm, "\nCAS NO: ", casn, sep = ""),
#   x = "Concentration (logM)",
#   y = "% Control Activity"
# )

#extract modelling results
m_toxi <- tcpl_models[[i]]$model_toxi
m_prim <- tcpl_models[[i]]$model_prim

#create 100 concentrations
s <- expand.grid(logc = seq(lb, rb, length = 130))

#test and plot cytotox model
if (!is.na(m_toxi$hill) & m_toxi$hill == 1) {
  para_cyto <- c(m_toxi$hill_tp, m_toxi$hill_ga, m_toxi$hill_gw)
  p1 <- 100 - hill_model(para_cyto, s)
  p1 <- dplyr::bind_cols(s, data.frame(p1))
  names(p1) <- c("logc", "pred")
  g <- g + geom_line(
    data = p1,
    aes(x = logc, y = pred),
    size = 2,
    alpha = 0.9,
    color = "#e02929"
  )
  #plot the vertical line at 3bmad cutoff
  #g <- g + geom_vline(xintercept = log_abs_ec(para_cyto, 3*m_toxi$bmad) )
}

#test and plot raiu model
if (!is.na(m_prim$hill) & m_prim$hill == 1) {
  para_raiu <- c(m_prim$hill_tp, m_prim$hill_ga, m_prim$hill_gw)

  p2 <- 100 - hill_model(para_raiu, s)
  p2 <- bind_cols(s, data.frame(p2))
  names(p2) <- c("logc", "pred")
  g <- g + geom_line(
    data = p2,
    aes(x = logc, y = pred),
    size = 2,
    alpha = 0.9,
    color = "#377eb8"
  )
}

#draw 3bmad cutoff line for cytotox and raiu respectively
g <- g +
  geom_hline(

```

```

    yintercept = 100 - cutoff_toxi,
    alpha = 0.5,
    size = 0.5,
    linetype = "dashed",
    color = "#e02929"
  )

g <- g +
  geom_hline(
    yintercept = 100 - cutoff_prim,
    alpha = 0.5,
    size = 0.5,
    linetype = "dashed",
    color = "#377eb8"
  )

#plot data points
#aesthetics fixes
g <- g +
  geom_point(
    aes(color = assay),
    shape = 21,
    alpha = 0.9,
    size = 3
  ) +
  coord_fixed(
    ylim = c(0, 125),
    #xlim = c(-10, -4),
    ratio = 4 / 120 #used to be 2/70, when x axis was from -9 to -4.
  ) +
  scale_y_continuous(breaks = seq(
    from = 0,
    to = 120,
    by = 20
  )) +
  scale_x_continuous(breaks = seq(
    from = lb,
    to = rb,
    by = 1
  )) +
  theme_few() +
  theme(legend.title = element_blank()) +
  scale_color_manual(values=c("#e02929", "#377eb8"))+
  theme(plot.title=element_text(hjust=0.5))

##adding annotations
if (!is.null(rank_table) & notation == TRUE) {
  #Get ec and ranking info
  ds <- rank_table %>% dplyr::filter(spid==.spid)
  ds <- round_df(ds, digits=2)

  #annotate with text info
  if (is.na(ds$ranking_score)) {

```

```

    line1 <- ""} else {
    line1 <- paste("Ranking_Score:", ds$ranking_score)
  }

  line2 <- paste("TAA:", ds$taa)
  line3 <- paste("Med_Diff:", ds$med_diff)
  line4 <- paste(assay_info$prim_assay, "_AC50: ", ds$AC50_prim, sep = "")
  line5 <- paste(assay_info$prim_assay, "_absEC50: ", ds$absEC50_prim, sep = "")
  #line6 <- paste(assay_info$prim_assay, "_absEC80: ", ds$absEC80_prim, sep = "")
  g <- g +
    annotate("text", x= lb + 0.8, y = 30, alpha = 0.8, hjust=0, label=line1) +
    annotate("text", x= lb + 0.8, y = 25, alpha = 0.8, hjust=0, label= line2) +
    annotate("text", x= lb + 0.8, y = 20, alpha = 0.8, hjust=0, label= line3) +
    annotate("text", x= lb + 0.8, y = 15, alpha = 0.8, hjust=0, label= line4) +
    annotate("text", x= lb + 0.8, y = 10, alpha = 0.8, hjust=0, label= line5)
  #annotate("text", x= lb + 0.8, y = 5, alpha = 0.8, hjust=0, label= line6)

  }

  #collect all plots into a list
  plot_list[[i]] <- g

}

return(plot_list)

}

#' Plot dose-resonse curves with minimal text annotation
#' This funciton plots dose-response curve with minimal text annotation,
#' no x and y axis label, 0 borders. Useful when need to present several plots
#' together.
#' @param tcpl_models the list object created by 'fit_curve_tcpl' function
#' @param rank_table the data.frame output from 'rank_tcpl' function
#' @param spid_chnm_table the spid, chnm, casn info table
#' @param notation value can be TRUE or FALSE, determine wheheter to show potency metrics on the plot
#' @param cunit the unit of concentration, on default is "M" (molar).
#'
#' @return list of ggplot2 objects, each corresponding to one spid.
#' @import ggthemes ggplot2
#'
#' @examples
#' ## produce plots without notations
#' demo_md <- fit_curve_tcpl(demo_mc_norm, assay_info =
#' list(prim_assay = "Primary", toxi_assay = "Cytotox"))
#' plots_minimal <- plot_tcpl_minimal(demo_md)
#'
#' ## start from raw data
#' # define assay
#' assay_info <- list(prim_assay = "Primary", toxi_assay = "Cytotox")
#' # data normalization

```

```

#' demo_mc_norm <- normalize_per_plate(demo_mc, nctrl = "DMSO")
#' # filter out two test chemicals
#' demo_mc_norm <- dplyr::filter(demo_mc_norm, spid %in% c("TP0001502B05", "TP0001502B01"))
#' # fit curve with default 20% threshold
#' demo_md <- fit_curve_tcpl(demo_mc_norm, assay_info)
#' # calculate TAA and Med_diff only
#' demo_rank <- rank_tcpl(demo_md, med_taa = NULL, med_med_diff = NULL)
#' #produce plots with notations
#' demo_plots <- plot_tcpl_minimal(demo_md, demo_rank, notation = TRUE)
#'
#' ##produce plots with notations, with changed concentration unit displayed on the plot
#' demo_plots <- plot_tcpl_minimal(demo_md, demo_rank, notation = TRUE, cunit = "uM")
#'
#'
#'
#' @export
#'
#'
plot_tcpl_minimal <-
  function(tcpl_models, rank_table = NULL, spid_chnm_table = NULL, notation = FALSE, cunit = "M") {

    # claim variables for passing R CMD Check
    spid <- nval_median <- logc <- resp <- pred <- assay <- NULL

    #initiate empty output plot list
    plot_list <- list()

    #reorder if rank is available
    if (!is.null(rank_table)) {
      tcpl_models <- tcpl_models[rank_table$index]
    }

    #loop through tcpl_models's unique spid.
    #note tcpl_models is the level 4 output from tcpl package, including all the modelling results
    for (i in seq_along(tcpl_models)) {
      #get chemical sample id and chemical name
      .spid <- tcpl_models[[i]]$spid
      #print(.spid)
      if (!is.null(spid_chnm_table)) {
        chnm <- dplyr::filter(spid_chnm_table, spid == .spid)$chnm
        casn <- dplyr::filter(spid_chnm_table, spid == .spid)$casn
      } else {
        chnm <- NA
        casn <- NA
      }

      #cutoff
      cutoff_prim <- tcpl_models[[i]]$cutoff_prim
      cutoff_toxi <- tcpl_models[[i]]$cutoff_toxi
      #assay_info
      assay_info <- tcpl_models[[i]]$assay_info
    }
  }

```



```

#get normalized response value (cytotox and raiu together)
#and use 100 minus the response value (inverse the plot)
d <- dplyr::bind_rows(tcpl_models[[i]]$data_prim, tcpl_models[[i]]$data_toxi) %>%
  dplyr::mutate(resp = nval_median) #>%
  #mutate(assay = ifelse(aeid == 1, assay_info$toxi_assay, assay_info$prim_assay))

#determine left and right x boundary of the plot
if ( round(max(d$logc)) < max(d$logc) ) {
  rb <- round(max(d$logc)) + 1
} else { rb <- round(max(d$logc))}

lb <- round(min(d$logc))-1

#initiate basic plot with data points.
g <- ggplot(d, aes(x = logc, y = resp))

if (!is.null(spid_chnm_table)){
  g <- g + labs(
    title = paste(chnm, sep = ""),
    x = paste("Concentration (log", cunit, ")", sep = ""),
    y = "% Control Activity"
  )
} else {
  g <- g + labs(
    title = paste(i, ". SPID:" , .spid),
    x = paste("Concentration (log", cunit, ")", sep = ""),
    y = "% Control Activity"
  )
}

# labs(
#   title = paste(i, "\nSPID: " , .spid, "\nNAME: ", chnm, "\nCAS NO: ", casn, sep = ""),
#   x = "Concentration (logM)",
#   y = "% Control Activity"
# )

#extract modelling results
m_toxi <- tcpl_models[[i]]$model_toxi
m_prim <- tcpl_models[[i]]$model_prim

#create 100 concentrations
s <- expand.grid(logc = seq(lb, rb, length = 130))

#test and plot cytotox model
if (!is.na(m_toxi$hill) & m_toxi$hill == 1) {
  para_cyto <- c(m_toxi$hill_tp, m_toxi$hill_ga, m_toxi$hill_gw)
  p1 <- 100 - hill_model(para_cyto, s)
  p1 <- dplyr::bind_cols(s, data.frame(p1))
  names(p1) <- c("logc", "pred")
  g <- g + geom_line(
    data = p1,
    aes(x = logc, y = pred),
    size = 2,

```

```

    alpha = 0.9,
    color = "#e02929"
  )
  #plot the vertical line at 3bmad cutoff
  #g <- g + geom_vline(xintercept = log_abs_ec(para_cyto, 3*m_toxi$bmad) )
}

#test and plot raiu model
if (!is.na(m_prim$hill) & m_prim$hill == 1) {
  para_raiu <- c(m_prim$hill_tp, m_prim$hill_ga, m_prim$hill_gw)

  p2 <- 100 - hill_model(para_raiu, s)
  p2 <- bind_cols(s, data.frame(p2))
  names(p2) <- c("logc", "pred")
  g <- g + geom_line(
    data = p2,
    aes(x = logc, y = pred),
    size = 2,
    alpha = 0.9,
    color = "#377eb8"
  )
}

#draw 3bmad cutoff line for cytotox and raiu respectively
g <- g +
  geom_hline(
    yintercept = 100 - cutoff_toxi,
    alpha = 0.5,
    size = 0.5,
    linetype = "dashed",
    color = "#e02929"
  )

g <- g +
  geom_hline(
    yintercept = 100 - cutoff_prim,
    alpha = 0.5,
    size = 0.5,
    linetype = "dashed",
    color = "#377eb8"
  )

#plot data points
#aesthetics fixes
g <- g +
  geom_point(
    aes(color = assay),
    shape = 21,
    alpha = 0.9,
    size = 3
  ) +
  coord_fixed(
    ylim = c(0, 125),

```

```

    xlim = c(-9, -4),
    ratio = 2 / 70 #used to be 2/70, when x axis was from -9 to -4.
  ) +
  scale_y_continuous(breaks = seq(
    from = 0,
    to = 120,
    by = 20
  )) +
  scale_x_continuous(breaks = seq(
    from = lb,
    to = rb,
    by = 1
  )) +
  theme_few() +
  theme(axis.title.x = element_blank()) +
  theme(axis.title.y = element_blank()) +
  theme(legend.title = element_blank(),
        legend.position = "none") +
  theme(legend.margin=unit(0, "null")) +
  scale_color_manual(values=c("#e02929", "#377eb8"))+
  theme(plot.title=element_text(hjust=0.5, size = 16))

##adding annotations
if (!is.null(rank_table) & notation == TRUE) {
  #Get ec and ranking info
  ds <- rank_table %>% dplyr::filter(spид==.spид)
  ds <- round_df(ds, digits=2)

  #annotate with text info
  line1 <- paste("Ranking_Score:", ds$ranking_score)
  # line2 <- paste("TAA:", ds$taa)
  # line3 <- paste("Med_Diff:", ds$med_diff)
  line4 <- paste("AC50: ", ds$AC50_prim, sep = "")
  line5 <- paste("absEC50: ", ds$absEC50_prim, sep = "")
  # line6 <- paste(assay_info$prim_assay, "_absEC80: ", ds$absEC80_prim, sep = "")
  g <- g +
    annotate("text", x= lb + 0.8, y = 34, alpha = 0.8, hjust=0, label=line1) +
    # annotate("text", x= lb + 0.8, y = 25, alpha = 0.8, hjust=0, label= line2) +
    # annotate("text", x= lb + 0.8, y = 20, alpha = 0.8, hjust=0, label= line3) +
    annotate("text", x= lb + 0.8, y = 22, alpha = 0.8, hjust=0, label= line4) +
    annotate("text", x= lb + 0.8, y = 10, alpha = 0.8, hjust=0, label= line5)
    # annotate("text", x= lb + 0.8, y = 5, alpha = 0.8, hjust=0, label= line6)

}

#collect all plots into a list
plot_list[[i]] <- g

}

return(plot_list)
}

```
